# Supplementary material for: Design, synthesis, anti-proliferative evaluation, docking, and MD simulations studies of new thiazolidine-2,4-diones targeting VEGFR-2 and apoptosis pathway
Source: PubMed Central journal article supplement (PMC9506633; doi:10.1371/journal.pone.0272362), 2022-09-23
Supplement: pone.0272362.s001.pdf [file pone.0272362.s001.pdf]

**Design, synthesis, anti-proliferative evaluation, docking, and MD simulations studies  
of new thiazolidine-2,4-diones targeting VEGFR-2 and apoptosis pathway**

Mohammed S. Taghour<sup>a</sup>, Hazem Elkady<sup>a</sup>, Wagdy M. Eldehna<sup>b</sup>, Nehal El-Deeb<sup>c,d</sup>, Ahmed M. Kenawy<sup>e</sup>, Eslam B. Elkaeed<sup>f</sup>, Bshra A. Alsouk<sup>g</sup>, Mohamed S. Alesawy<sup>a</sup>, Dalal Z. Husein<sup>h</sup>,  
Ahmed M. Metwaly<sup>i,d,\*</sup> Ibrahim H. Eissa<sup>a,\*</sup>

<sup>a</sup> Pharmaceutical Medicinal Chemistry & Drug Design Department, Faculty of Pharmacy (Boys), Al-Azhar University, Cairo11884, Egypt.

<sup>b</sup> Department of Pharmaceutical Chemistry, Faculty of Pharmacy, Kafrelsheikh University, P.O. Box 33516, Kafrelsheikh, Egypt.

<sup>c</sup> Biopharmaceutical Products Research Department, Genetic Engineering and Biotechnology Research Institute, City of Scientific Research and Technological Applications (SRTA-City), Alexandria 21934, Egypt.

<sup>d</sup> Pharmaceutical and Fermentation Industries Development Center, City of Scientific Research and Technological Applications (SRTA city), Alexandria 21934, Egypt.

<sup>e</sup> Nucleic Acids Research Department, Genetic Engineering and Biotechnology Research Institute. City of Scientific Research and Technological Applications (SRTA-City). Alexandria 21934, Egypt.

<sup>f</sup> Department of Pharmaceutical Sciences, College of Pharmacy, AlMaarefa University, Riyadh 13713, Saudi Arabia.

<sup>g</sup> Department of Pharmaceutical Sciences, College of Pharmacy, Princess Nourah bint Abdulrahman University, P.O. Box 84428, Riyadh 11671, Saudi Arabia.

<sup>h</sup> Chemistry Department, Faculty of Science, New Valley University, El-Kharja 72511, Egypt.

<sup>i</sup> Pharmacognosy and Medicinal Plants Department, Faculty of Pharmacy (Boys), Al-Azhar University, Cairo 11884, Egypt.

**\*Corresponding authors:**

**Ibrahim H. Eissa**

Medicinal Chemistry Department, Faculty of Pharmacy (Boys), Al-Azhar University, Cairo 11884, Egypt. **Email:** [Ibrahimeissa@azhar.edu.eg](mailto:Ibrahimeissa@azhar.edu.eg)

**Ahmed M. Metwaly**

Pharmacognosy and Medicinal Plants Department, Faculty of Pharmacy (Boys), Al-Azhar University, Cairo 11884, Egypt. **Email:** [ametwaly@azhar.edu.eg](mailto:ametwaly@azhar.edu.eg)

## Content

|            |                                                                                                                                                                                                                                                                                                                                    |
|------------|------------------------------------------------------------------------------------------------------------------------------------------------------------------------------------------------------------------------------------------------------------------------------------------------------------------------------------|
| <b>S.1</b> | <b>Biological testing</b><br>S.1.1. Safety assay<br>S.1.2. <i>In vitro</i> anti-proliferative activity.<br>S.1.3. <i>In vitro</i> VEGFR-2 kinase assay.<br>S.1.4. Selectivity index (SI)<br>S.1.5. Wound healing assay (Migration assay).<br>S.1.6. Gene expression pattern alternation of cancer cell after <b>14a</b> treatment. |
| <b>S.2</b> | <b><i>In silico</i> studies</b><br>S.2.1. Docking studies<br>S.2.2. ADMET studies<br>S.2.3. Toxicity studies<br>S.2.4. MD simulation<br>S.2.5. MMPBSA                                                                                                                                                                              |
| <b>S.3</b> | <b>Chemistry and materials</b>                                                                                                                                                                                                                                                                                                     |
| <b>S.4</b> | <b>Spectral data</b>                                                                                                                                                                                                                                                                                                               |
| <b>S.5</b> | <b>Raw data for biological testing</b>                                                                                                                                                                                                                                                                                             |
| <b>S.6</b> | <b><i>In silico</i> cytotoxicity report</b>                                                                                                                                                                                                                                                                                        |

## **S.1. Biological testing**

### **Mammalian cell lines culture**

CaCo-2, and A549 cell lines were cultured on DMEM media, meanwhile MDA-MB-231 and hepG-2 cell line were cultured on RBMI media. The cultured media were supplemented with 200 mM L-glutamine, 10.0% fetal bovine serum (Lonza), and 1.0% penicillin/streptomycin. Cells were seeded into 25.0 cm tissue culture flasks and incubated at 37°C in a 5.0% CO<sub>2</sub> incubator for 24 h or till confluency.

#### **S.1.1. Safety assay**

The safety profiles of the tested compounds were checked on one non-cancerous cell line (Vero) to determine the treatments concentrations that do not depict toxic effects against the tested cells. A portion of 100.0 µl of 6×10<sup>4</sup> cell/ml cells was seeded into each well of a 96-well plate and then the plates were incubated at 37°C in a humidified 5.0% CO<sub>2</sub> incubator for 24 h. At the end of incubation period, the exhausted medium was replaced with 100.0 µl of different concentrations of the designated treatment (prepared in RPMI medium starting from 1.0 mM). The inoculated plates were incubated at the same growth conditions for another 24 h. At the end of incubation, cellular viability was assessed using MTS assay kit (Promega) according to the manual instruction.

#### **S.1.2. *In-vitro* anticancer activity**

Anticancer activities of the tested compounds against CaCo-2, MDA-MB-231, and hepG-2 cell lines were quantified using MTS assay kit (Promega) as described by the Manufacturer.

#### **S.1.3. *In vitro* VEGFR-2 kinase assay**

All the synthesized compounds were tested for its inhibitory activity against VEGFR-2. Human VEGFR-2 ELISA kit (Enzyme-Linked Immunosorbent Assay) was utilized in this test. At first, specific antibody for VEGFR-2 was seeded on a 96-well plate and 100 µL of the standard solution or the tested compound was added, all were incubated at room temperature for 2.5 h. Then washed, 100 µL of the prepared biotin antibody was added, then incubated at room temperature for additional 1 h. and washed. Then, 100 µL of streptavidin solution was added and incubated for 45 min. at room temperature. Washed again, 100 µL of TMB Substrate reagent was added and incubated for 30 min. at room temperature. 50 µL of the stop solution was added, then read at 450 nm immediately. The standard curve was drawn, concentrations on the X-axis and the absorbance on the Y-axis.

#### S.1.4. Selectivity index (SI)

The selectivity index values of the tested compounds on cancer cells were calculated as described by Koch et al. [57], with slight modifications;  $SI = IC_{50nc}/IC_{50cc}$ , where  $IC_{50nc}$ : the  $IC_{50}$  value of the tested compound on normal cells and  $IC_{50cc}$ :  $IC_{50}$  of the tested compound on cancer cell line.

#### S.1.5. Wound healing assay (Migration assay)

CaCo-2 cells were grown to 95.0% confluency in a complete DMEM medium and then the wounds were formed using a plastic tip. After washing with pre-warmed PBS, the cells were incubated in the specific medium or the **14a** treatment. After incubation at 37°C and 5.0% CO<sub>2</sub> for 24h, the cells were washed with PBS and the wounds distance was determined as the scratch width of the treated and untreated groups using ImageJ software.

#### S.1.6. Gene expression pattern alternation of cancer cell after 14a treatment

The molecular anticancer mode of action of **14a** was investigated by screening their ability to affect the gene expression levels of Bcl2, Bcl-xl, TGF and Survivin genes using specific forward and reverse primers and RTq-PCR technique (Table 1) in CaCo-2 cells (chosen as the most sensitive cancer cell line). After cellular treatment, CaCo-2 cell line was cultured into 12 well plates ( $6 \times 10^3$  cell/ml) for 24 h. with the sub- $IC_{50}$  concentration of **14a**. After treatment, total RNA extraction was performed using RNA extraction kit (Qiagen, Germany). Then, 1 ug of the obtained RNA was used to synthesiz cDNA using cDNA synthesis kit (Promega Corp., Madison, WI) as recommended by the manufacturer. Simultaneously, GAPDH forward and reverse primers (Table 1) were used to amplify the house keeping gene as internal control for standardization of PCR products. The RTq-PCR was done using SYBR Green dye (QuantiTect SYBR Green PCR Kits) and Light Cycler fluorimeter (Bio-RAD S1000 Tm thermal cycler). The PCR cycling program was as follows: 95°C for 2 min, followed by 40 cycles of 95°C for 30s, 55°C for 30 s, and 60°C for 45s, and finally 60°C for 5 min.

#### -Sequence of the primers

| Primer ID | Sequence                         |
|-----------|----------------------------------|
| Bcl-F     | 5'-TATAAGCTGTTCGCAGAGGGGCTA-3'   |
| Bcl-R     | 5'-GTA CT CAGTCATCCACAGGGCGAT-3' |
| Bcl-Xlf   | 5'CAGAGCTTTGAACAGGTAG-3'         |
| Bcl-XIR   | 5'GCTCTCGGGTGCTGTATTG-3'         |



|                  |                                 |
|------------------|---------------------------------|
| Surv-F           | 5'-TGCCCCGACGTTGCC-3'           |
| Surv-R           | 5'-CAGTTCTTGAATGTAGAGATGCGGT-3' |
| TGF-F            | 5'CAAGGGCTACCATGCCAACT3'        |
| TGF-R            | 5'AGGGCCAGGACCTTGCTG3'          |
| $\beta$ -actin-F | 5'-GTGGGGCGCCCCAGGCACCA-3'      |
| $\beta$ -actin-R | 5'-CTCCTTAATGTACACGACGATTTC-3'  |

## S.2. *In silico* studies

### S.2.1. Docking studies

The docking studies were performed utilizing MOE.14 software to explore the binding mode of the synthesized compounds towards VEGFR-2. The 3D crystal structures of the target macromolecules VEGFR-2 were downloaded from the protein databank, <http://www.pdb.org> (PDB ID; 2OH4 and 4ASD). Sorafenib was used as reference ligand. To prepare the target protein, water molecules were removed, and the valances of atoms were corrected through protonation of the whole molecule. Then energy minimization was carried out by applying CHARMM and MMFF94 force fields. After that, the active binding site was defined and prepared for docking. The validation process was performed by redocking the co-crystallized ligand. The designed compounds together with sorafenib were drawn using ChemBioDraw Ultra 14.0 and saved as MDL-SD format. The sketched compounds were constructed from fragment libraries in MOE program, protonated, followed by energy minimization then prepared for docking. Docking process was carried through Triangle matcher placement inserted in compute window, and the scoring function was London dG. Ten conformers (poses) for each molecule were generated using genetic algorithm searches. The free energies and binding modes of the designed molecules against VEGFR-2 were determined. The most ideal pose was selected according to its binding free energy as well as its binding mode with target molecule.

S.2.1.1. The predicted binding pattern of **14b** with the active site of VEGFR-2

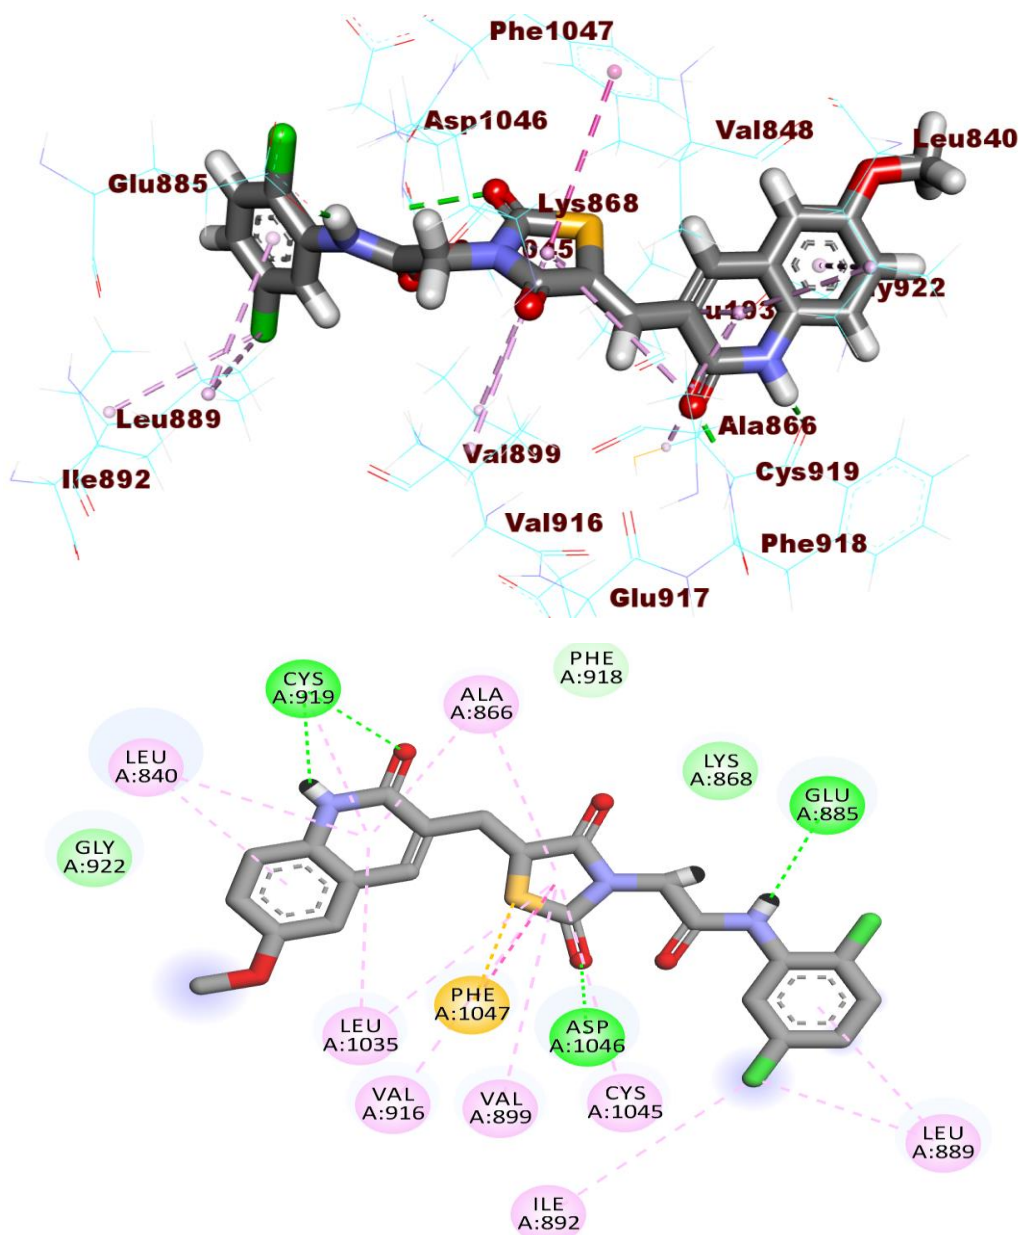

S2.1.2. The predicted binding pattern of **14c** with the active site of VEGFR-2

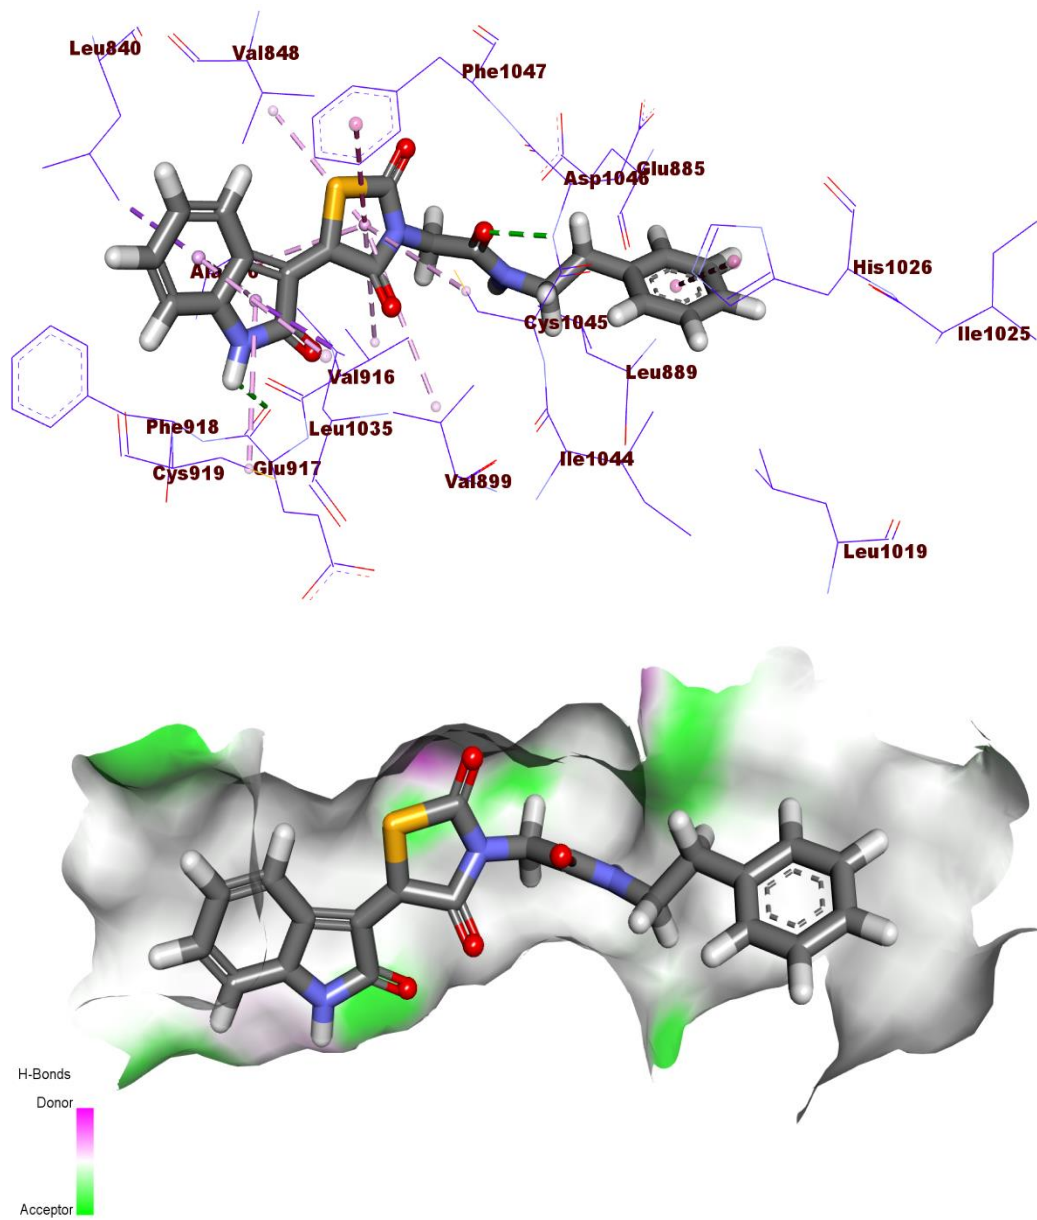

### **S.2.2. ADMET studies**

ADMET descriptors (absorption, distribution, metabolism, excretion and toxicity) of the synthesized compounds were determined using Discovery studio 4.0. At first, the CHARMM force field was applied then the compounds were prepared and minimized according to the preparation of small molecule protocol. Then ADMET descriptors protocol was applied to carry out these studies.

### **S.2.3. Toxicity studies**

The toxicity parameters of the synthesized compounds were calculated using Discovery studio 4.0. Sorafenib was used as a reference drug. At first, the CHARMM force field was applied then the compounds were prepared and minimized according to the preparation of small molecule protocol. Then different parameters were calculated from toxicity prediction (extensible) protocol.

### **S.2.4. Molecular dynamics simulation**

Molecular dynamics simulation of the protein-ligand complexes was performed using GROMACS 2021 and Linux 5.4 package. The GROMOS96 54a7 forcefield was selected as the force field for proteins and the ligand topologies were generated from the PRODRG server. All the complexes were solvated using simple point charge (SPC) water molecules in a rectangular box. To make the simulation system electrically neutral, required number of Na<sup>+</sup> and Cl<sup>-</sup> ions were added while 0.15 mol/L salt concentrations were set in all the systems. Using the steepest descent method, all the solvated systems were subjected to energy minimization for 5000 steps. Afterwards, NVT (constant number of particles, volume, and temperature) series, NPT (constant number of particles, pressure, and temperature) series, and the production run were conducted in the MD simulation. The NVT and the NPT series were conducted at a 300 K temperature and 1 atm pressure for the duration of 300 ps. V-rescale thermostat and Parrinello-Rahman barostat were selected of the performed simulation. Finally, the production run was performed at 300 K for a duration of 100 ns (nanoseconds). Thereafter, a comparative analysis was performed measuring root mean square deviation (RMSD), root mean square fluctuation (RMSF), radius of gyration (Rg), solvent accessible surface area (SASA) and hydrogen bonds to analyze their stability. The Xmgrace program was used to represent the analyses in the form of plots.

### S.2.5. MM/PBSA

The `g_mmpbsa` package of GROMACS was utilized to calculate the MM/PBSA (Molecular Mechanics/Poisson Boltzmann Surface Area) binding free energies followed by final MD production run to get a detailed overview of the molecular interactions between the protein and ligand. The free solvation energy (polar and nonpolar solvation energies) and potential energy (electrostatic and Van der Waals interactions) of each protein-ligand complex were analyzed to determine the total  $\Delta G_{\text{bind}}$  of the complex. The binding energies were calculated using the following equation in this method:

$$\Delta G_{\text{binding}} = G_{\text{complex}} - (G_{\text{protein}} + G_{\text{ligand}})$$

Here, the  $\Delta G_{\text{binding}}$  = the total binding energy of the protein-ligand complex,  $G_{\text{protein}}$  = the binding energy of free protein, and  $G_{\text{ligand}}$  = the binding energy of unbounded ligand.

### **S.3. Chemistry and material**

Melting points were measured with a Stuart melting point apparatus and were uncorrected. Infrared (IR) spectra were recorded as KBr disks using an FT-IR Spectrum BX apparatus (Perkin Elmer, CT, USA). NMR spectra were recorded on a Bruker NMR spectrometer (Bruker, Reinstetten, Germany).  $^1\text{H}$  spectra were run at 500 MHz and  $^{13}\text{C}$  spectra were run at 125 MHz in deuterated dimethyl sulfoxide (DMSO- $d_6$ ). Chemical shifts are expressed in values (ppm) using the solvent peak as an internal standard. All coupling constant ( $J$ ) values are given in Hz. The abbreviations used are as follows: s, singlet; d, doublet; m, multiplet. Analytical thin layer chromatography (TLC) on silica gel plates containing a UV indicator was employed routinely to follow the course of reactions and to check the purity of the products. All reagents and solvents were purified and dried by standard techniques. The microspheres were prepared with poly (D, L-lactide co-glycolide) PLGA (50:50, mol. wt 30,000–60,000), which was purchased from Sigma-Aldrich (St. Louis, USA). The emulsifier, low molecular weight polyvinyl alcohol (PVA) was obtained from Alfa Aesar (Karlsruhe, Germany). Dichloromethane (DCM) was purchased from Avonchem (United Kingdom). Dimethyl sulfoxide (DMSO) was obtained from Loba Chemie

(Mumbai, India). All ingredients used were of analytical grade. All cell lines have been purchased from the American Type Culture Collection (ATCC).

## S.4. Spectral data

### IR of compound 14a

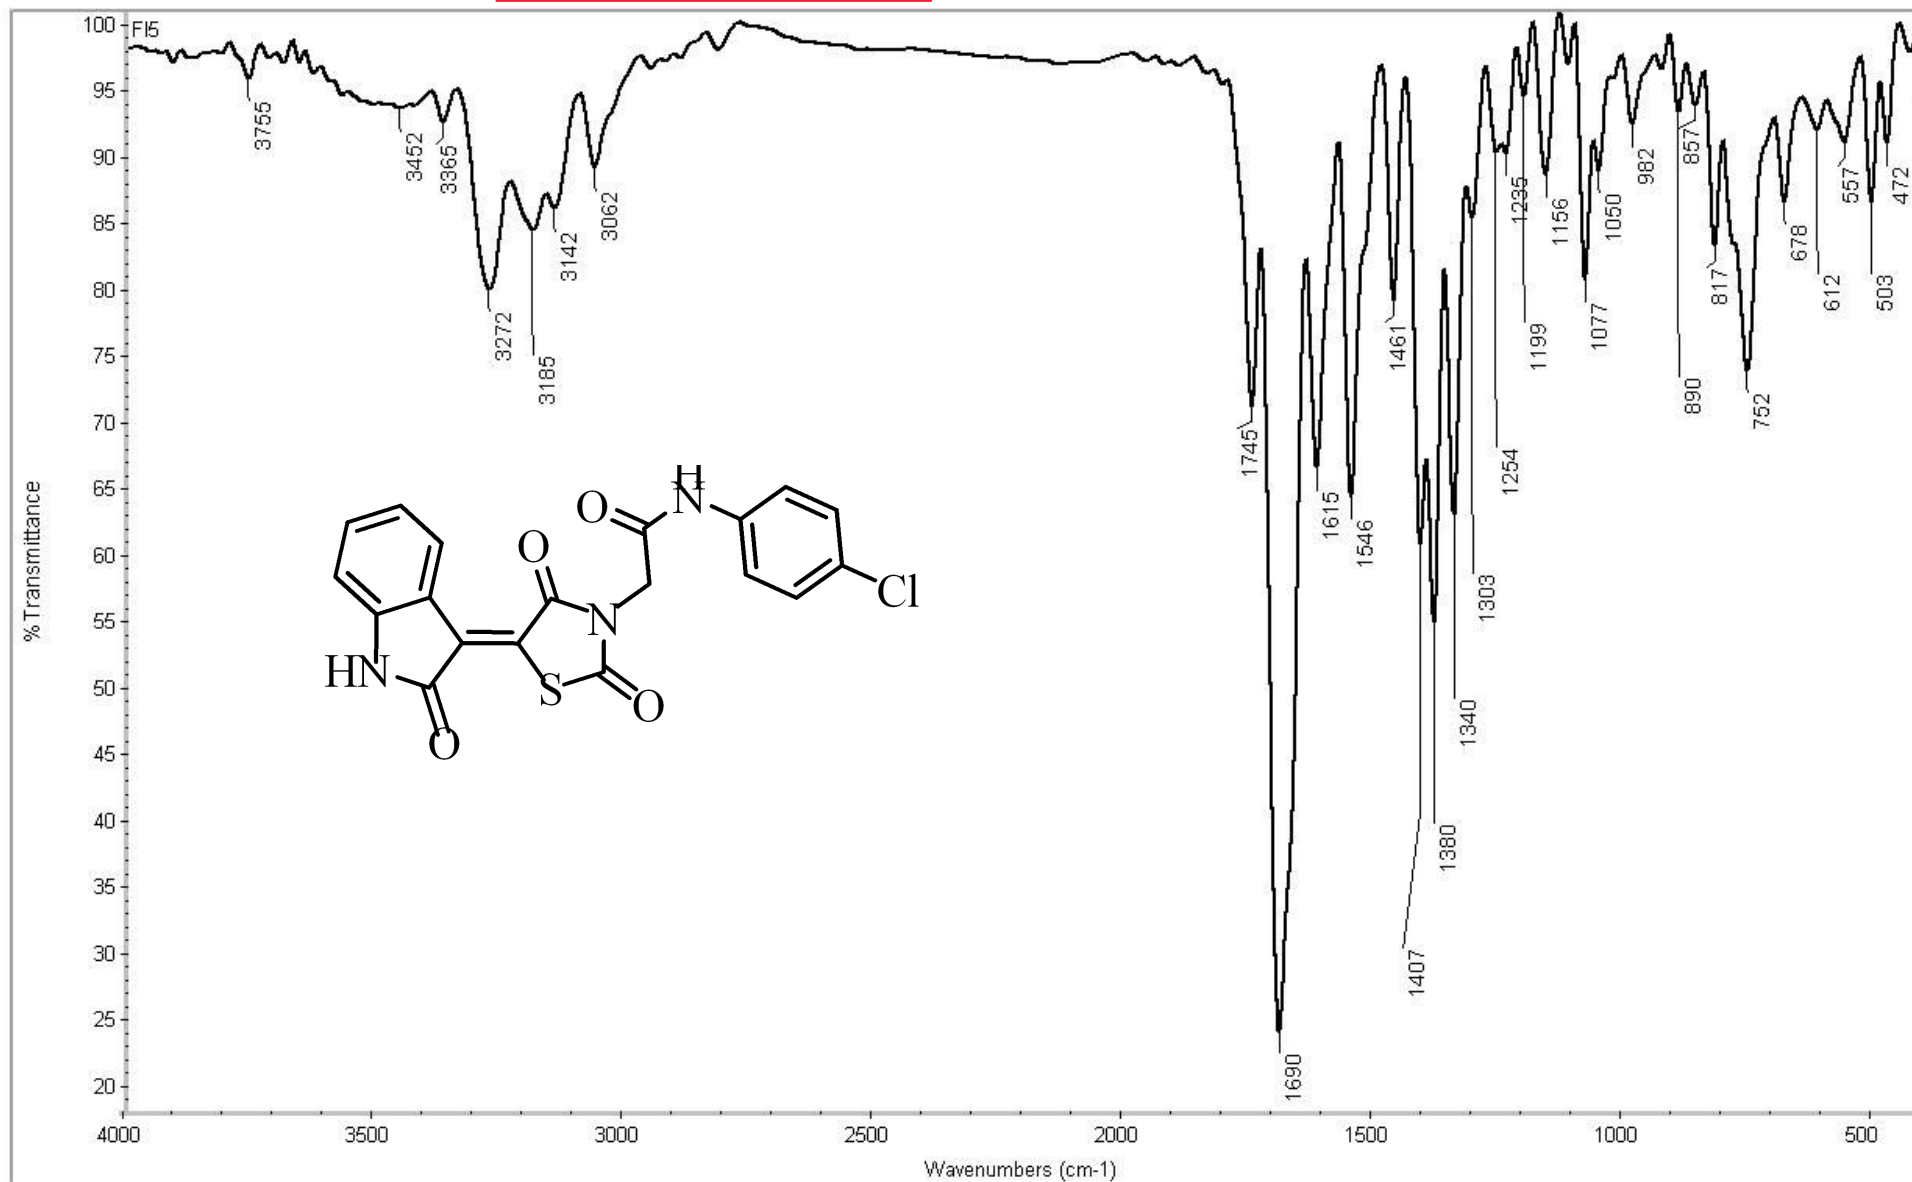

# IR of compound 14b

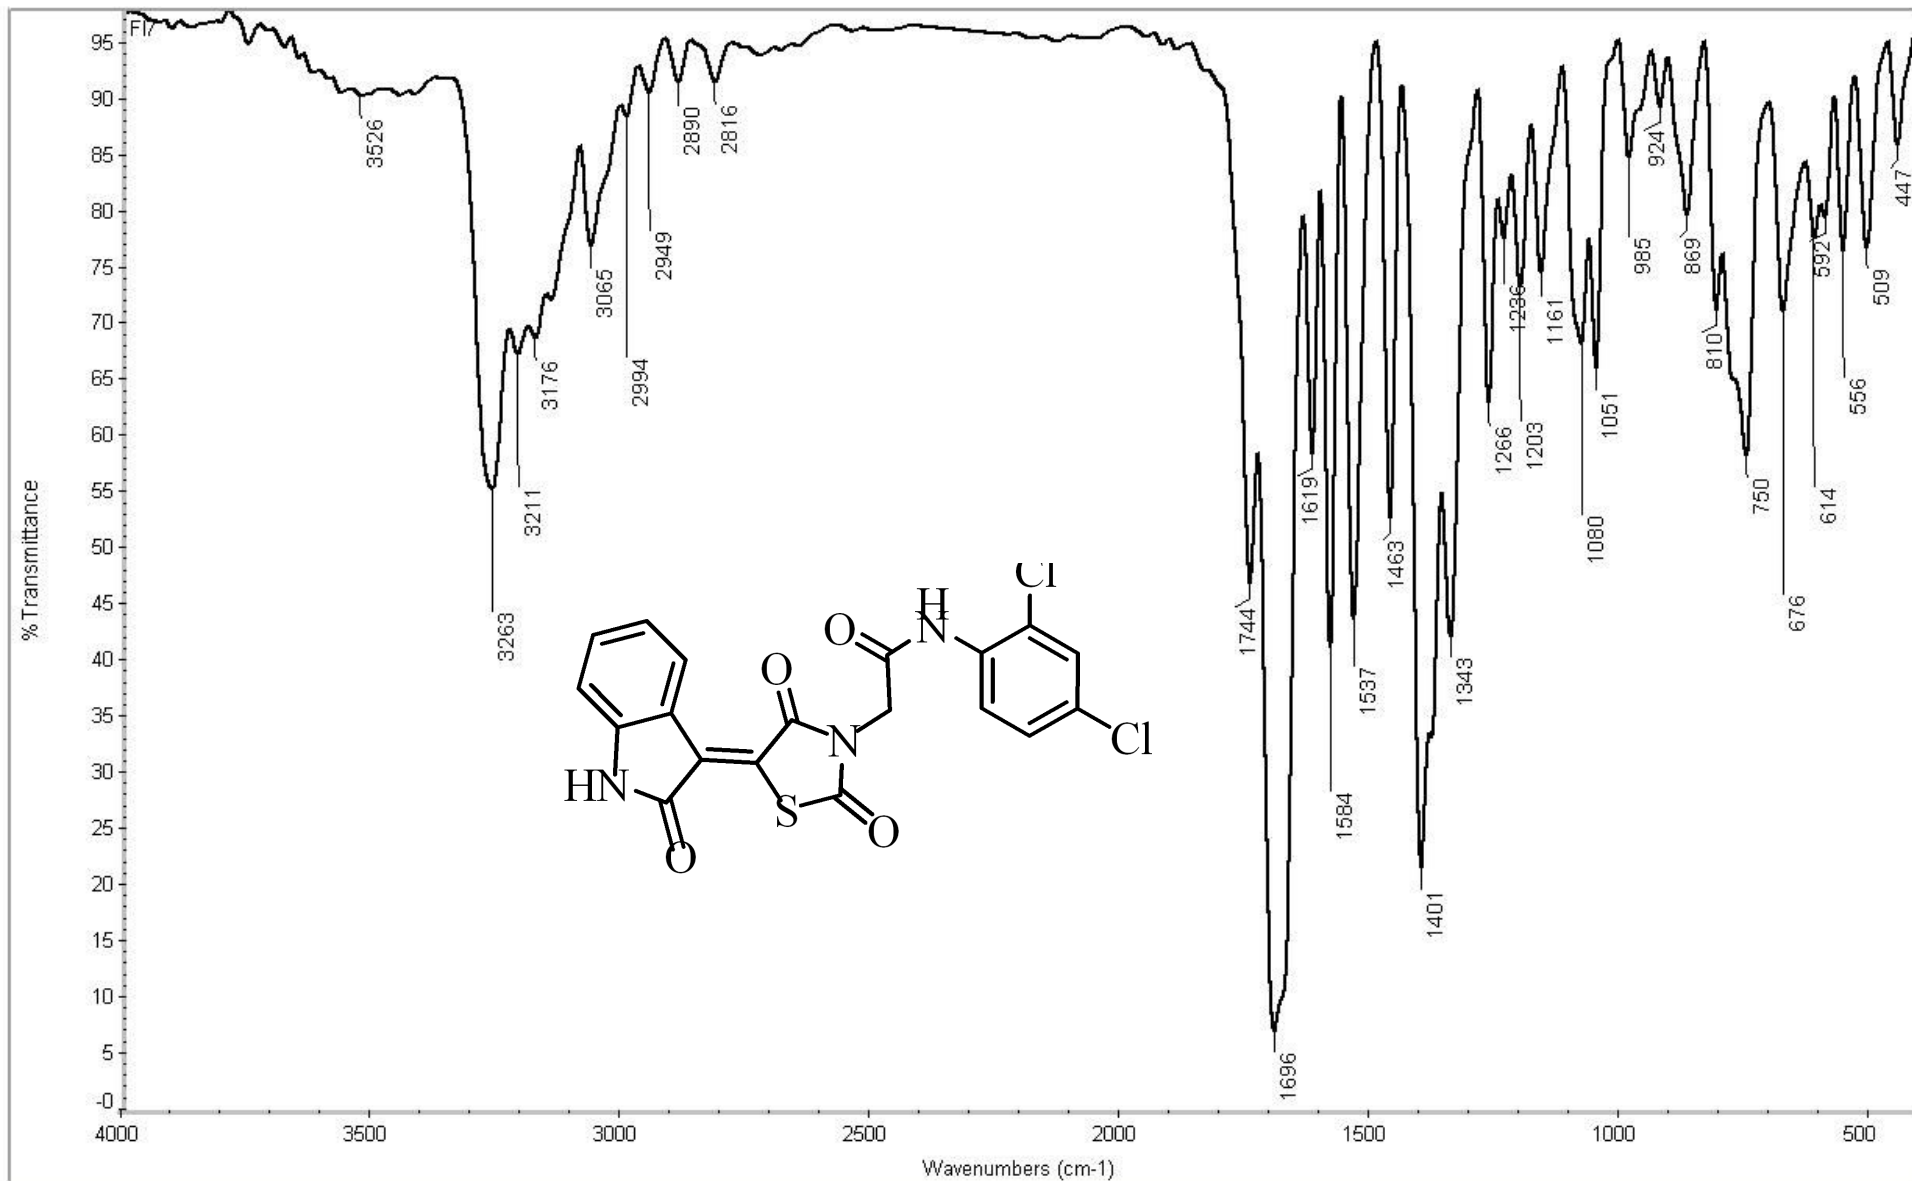



# IR of compound 14c

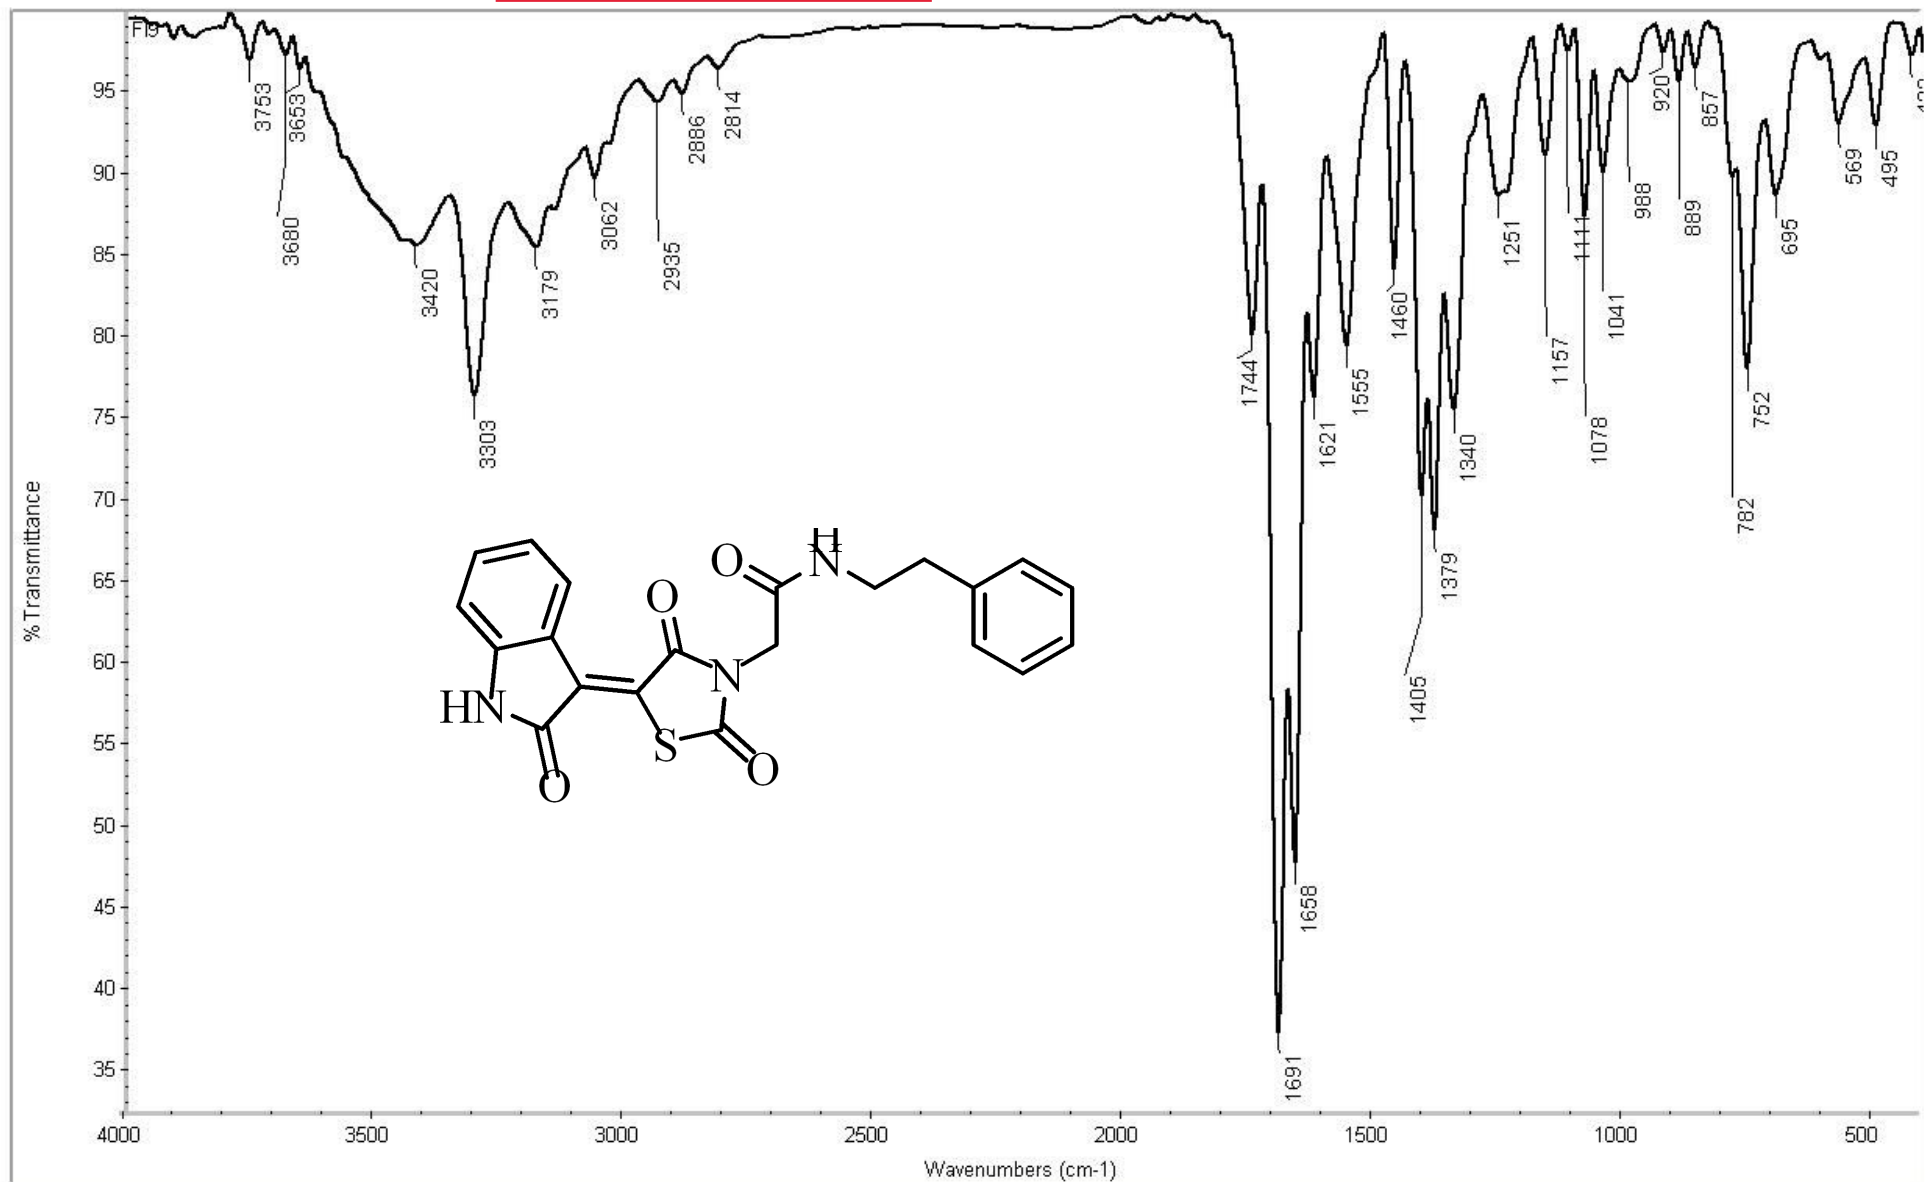

# IR of compound 10a

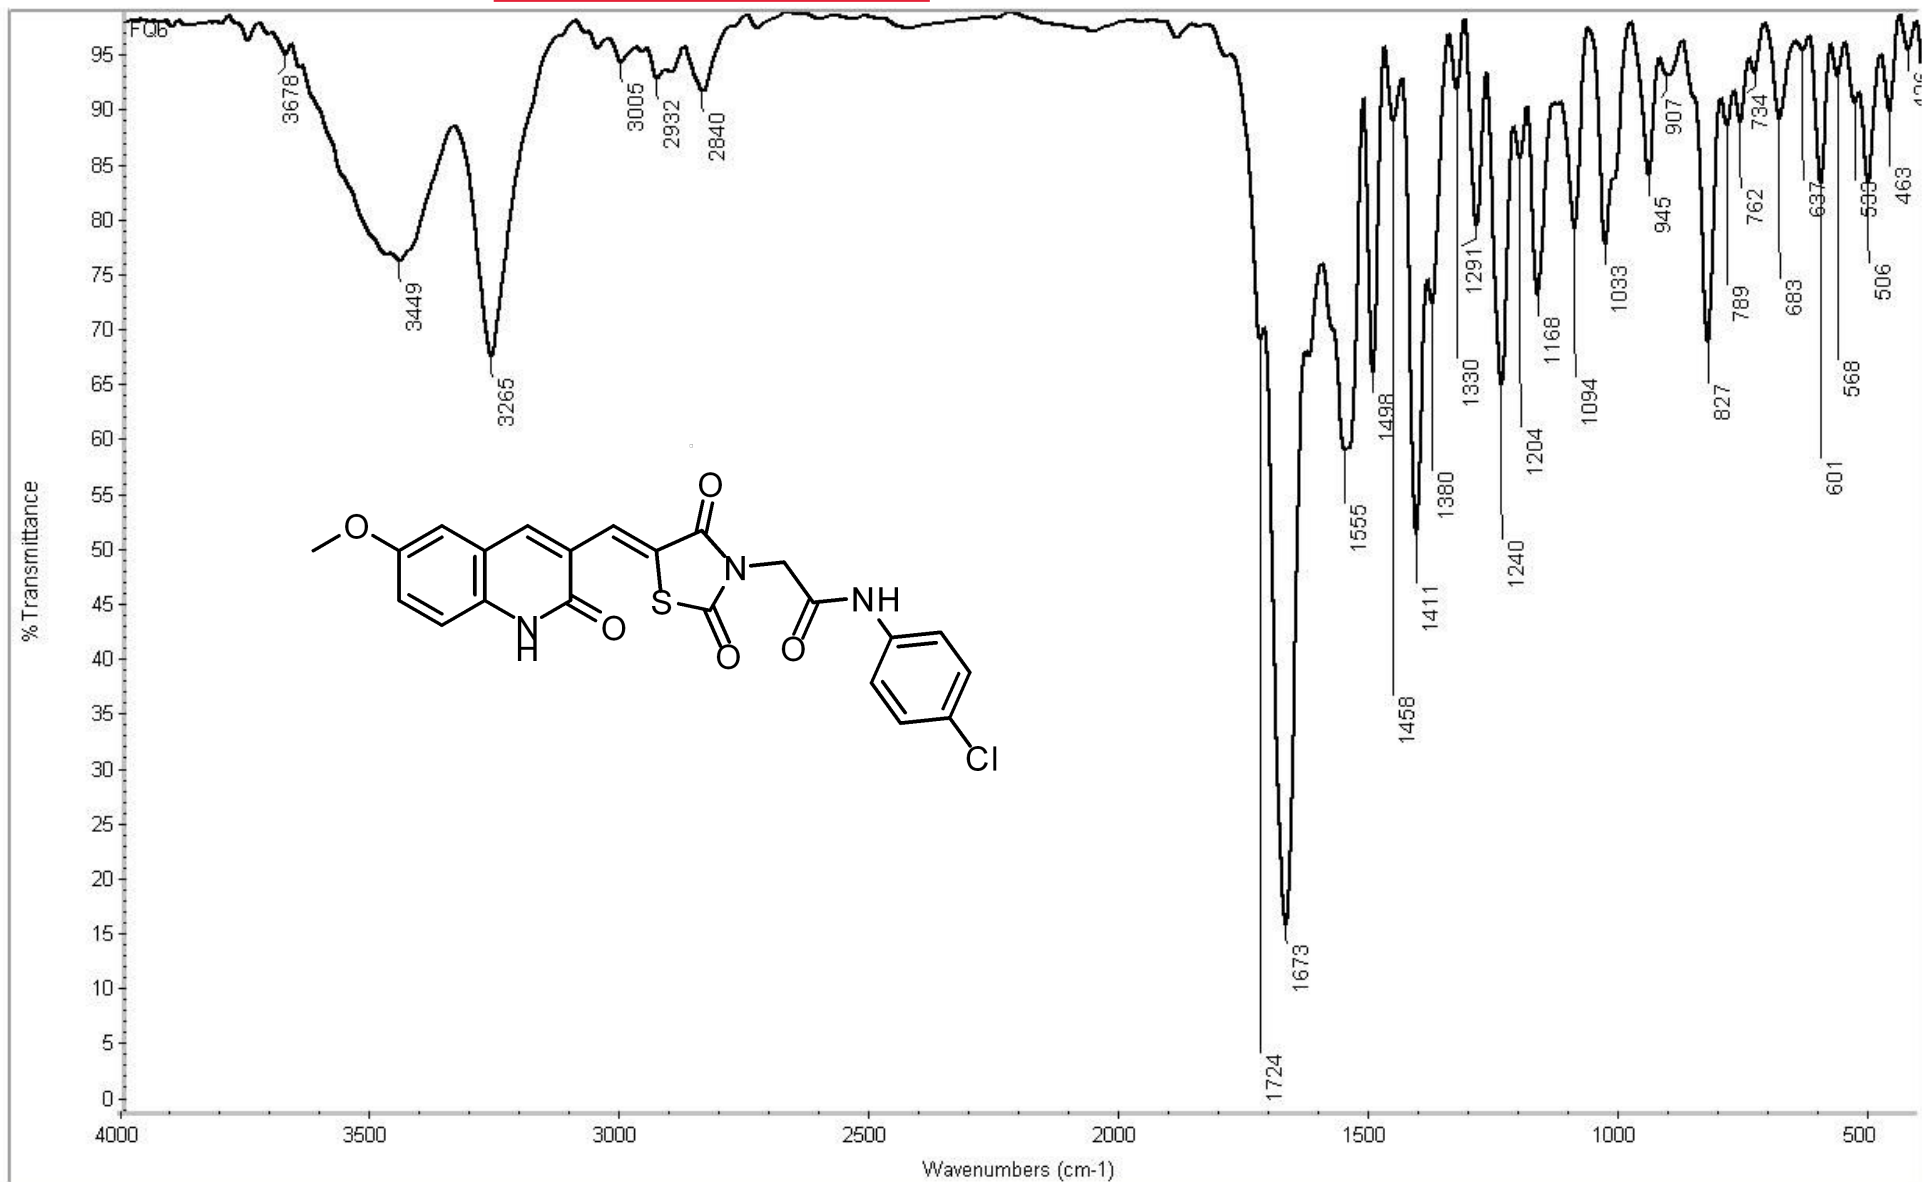

# IR of compound 10b

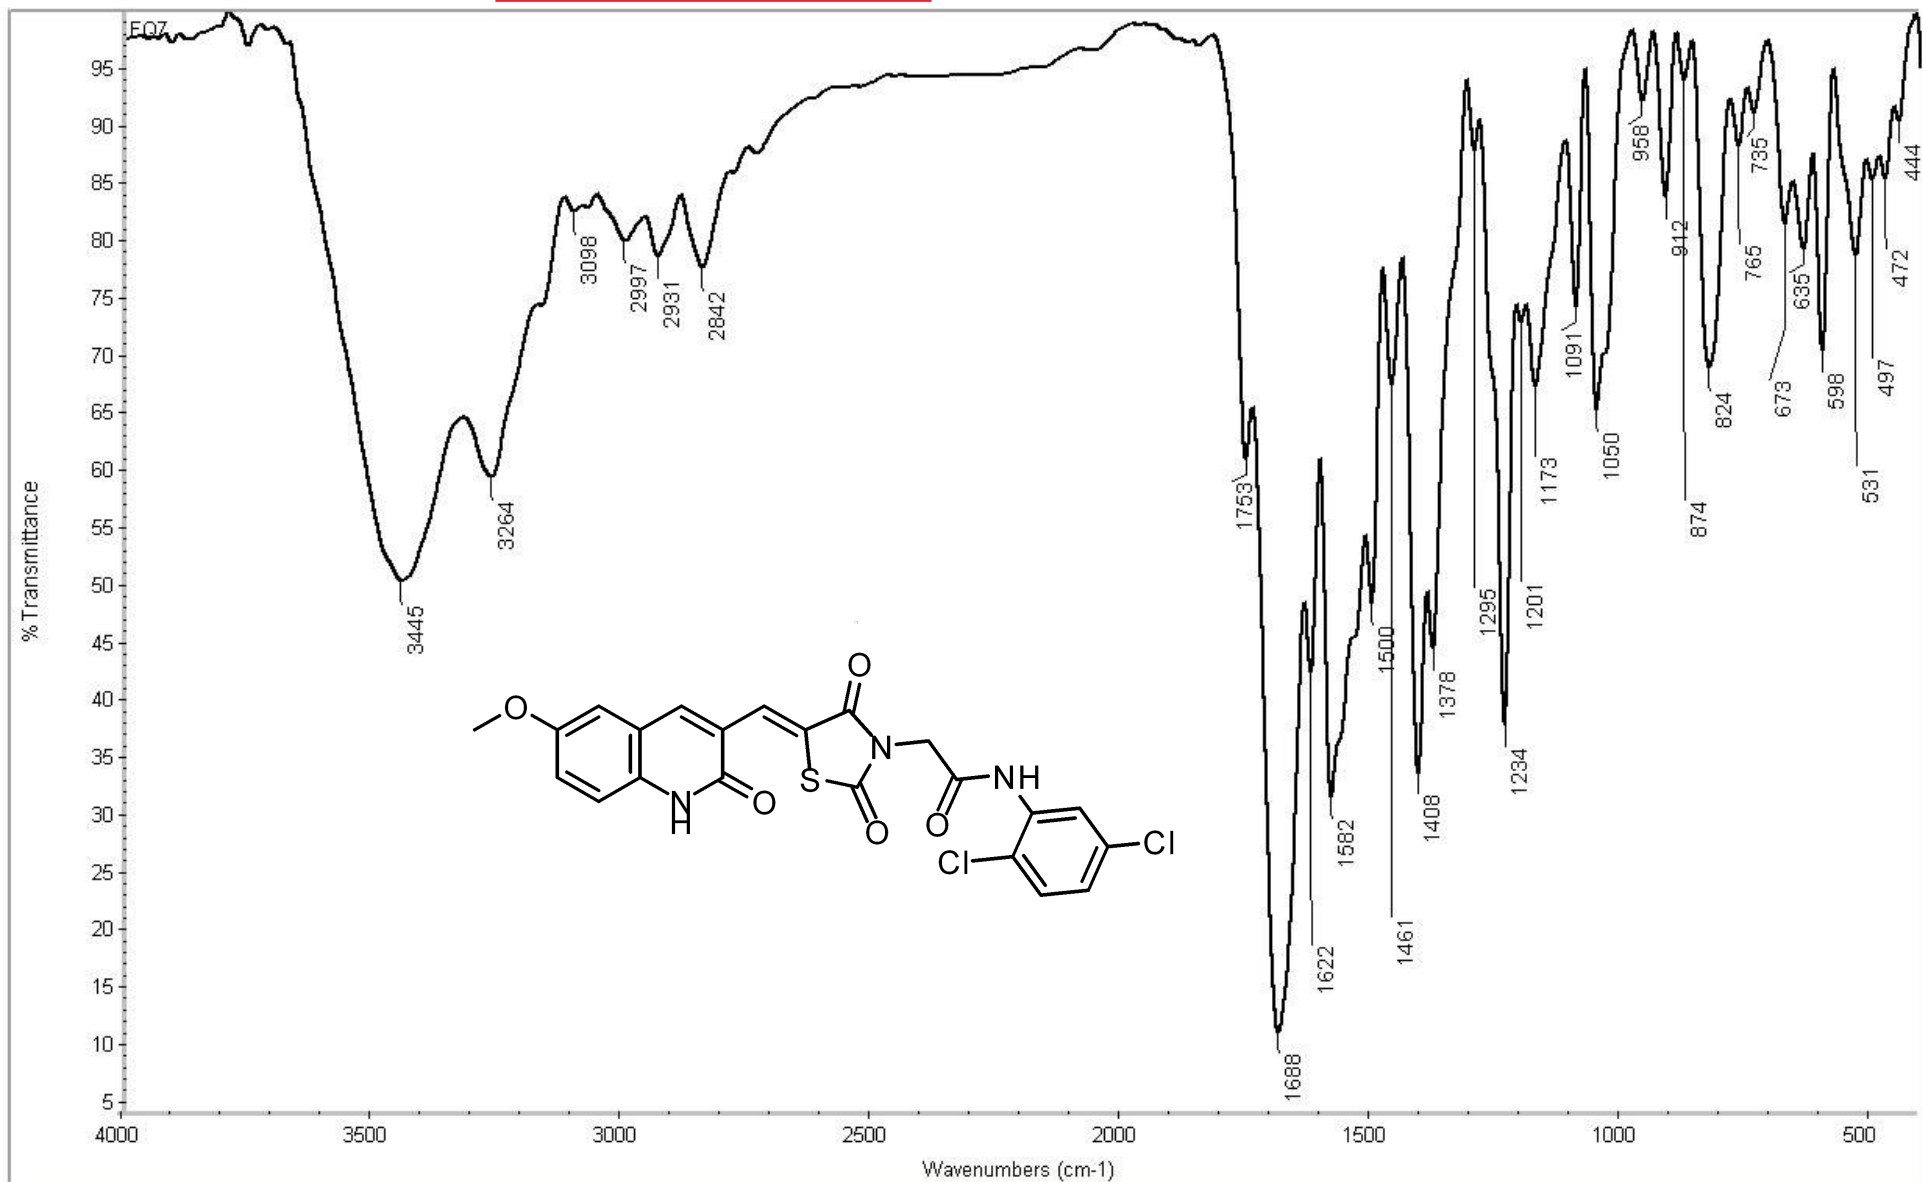

1H NMR of 14a

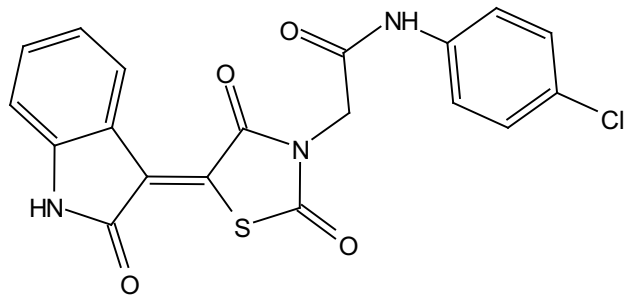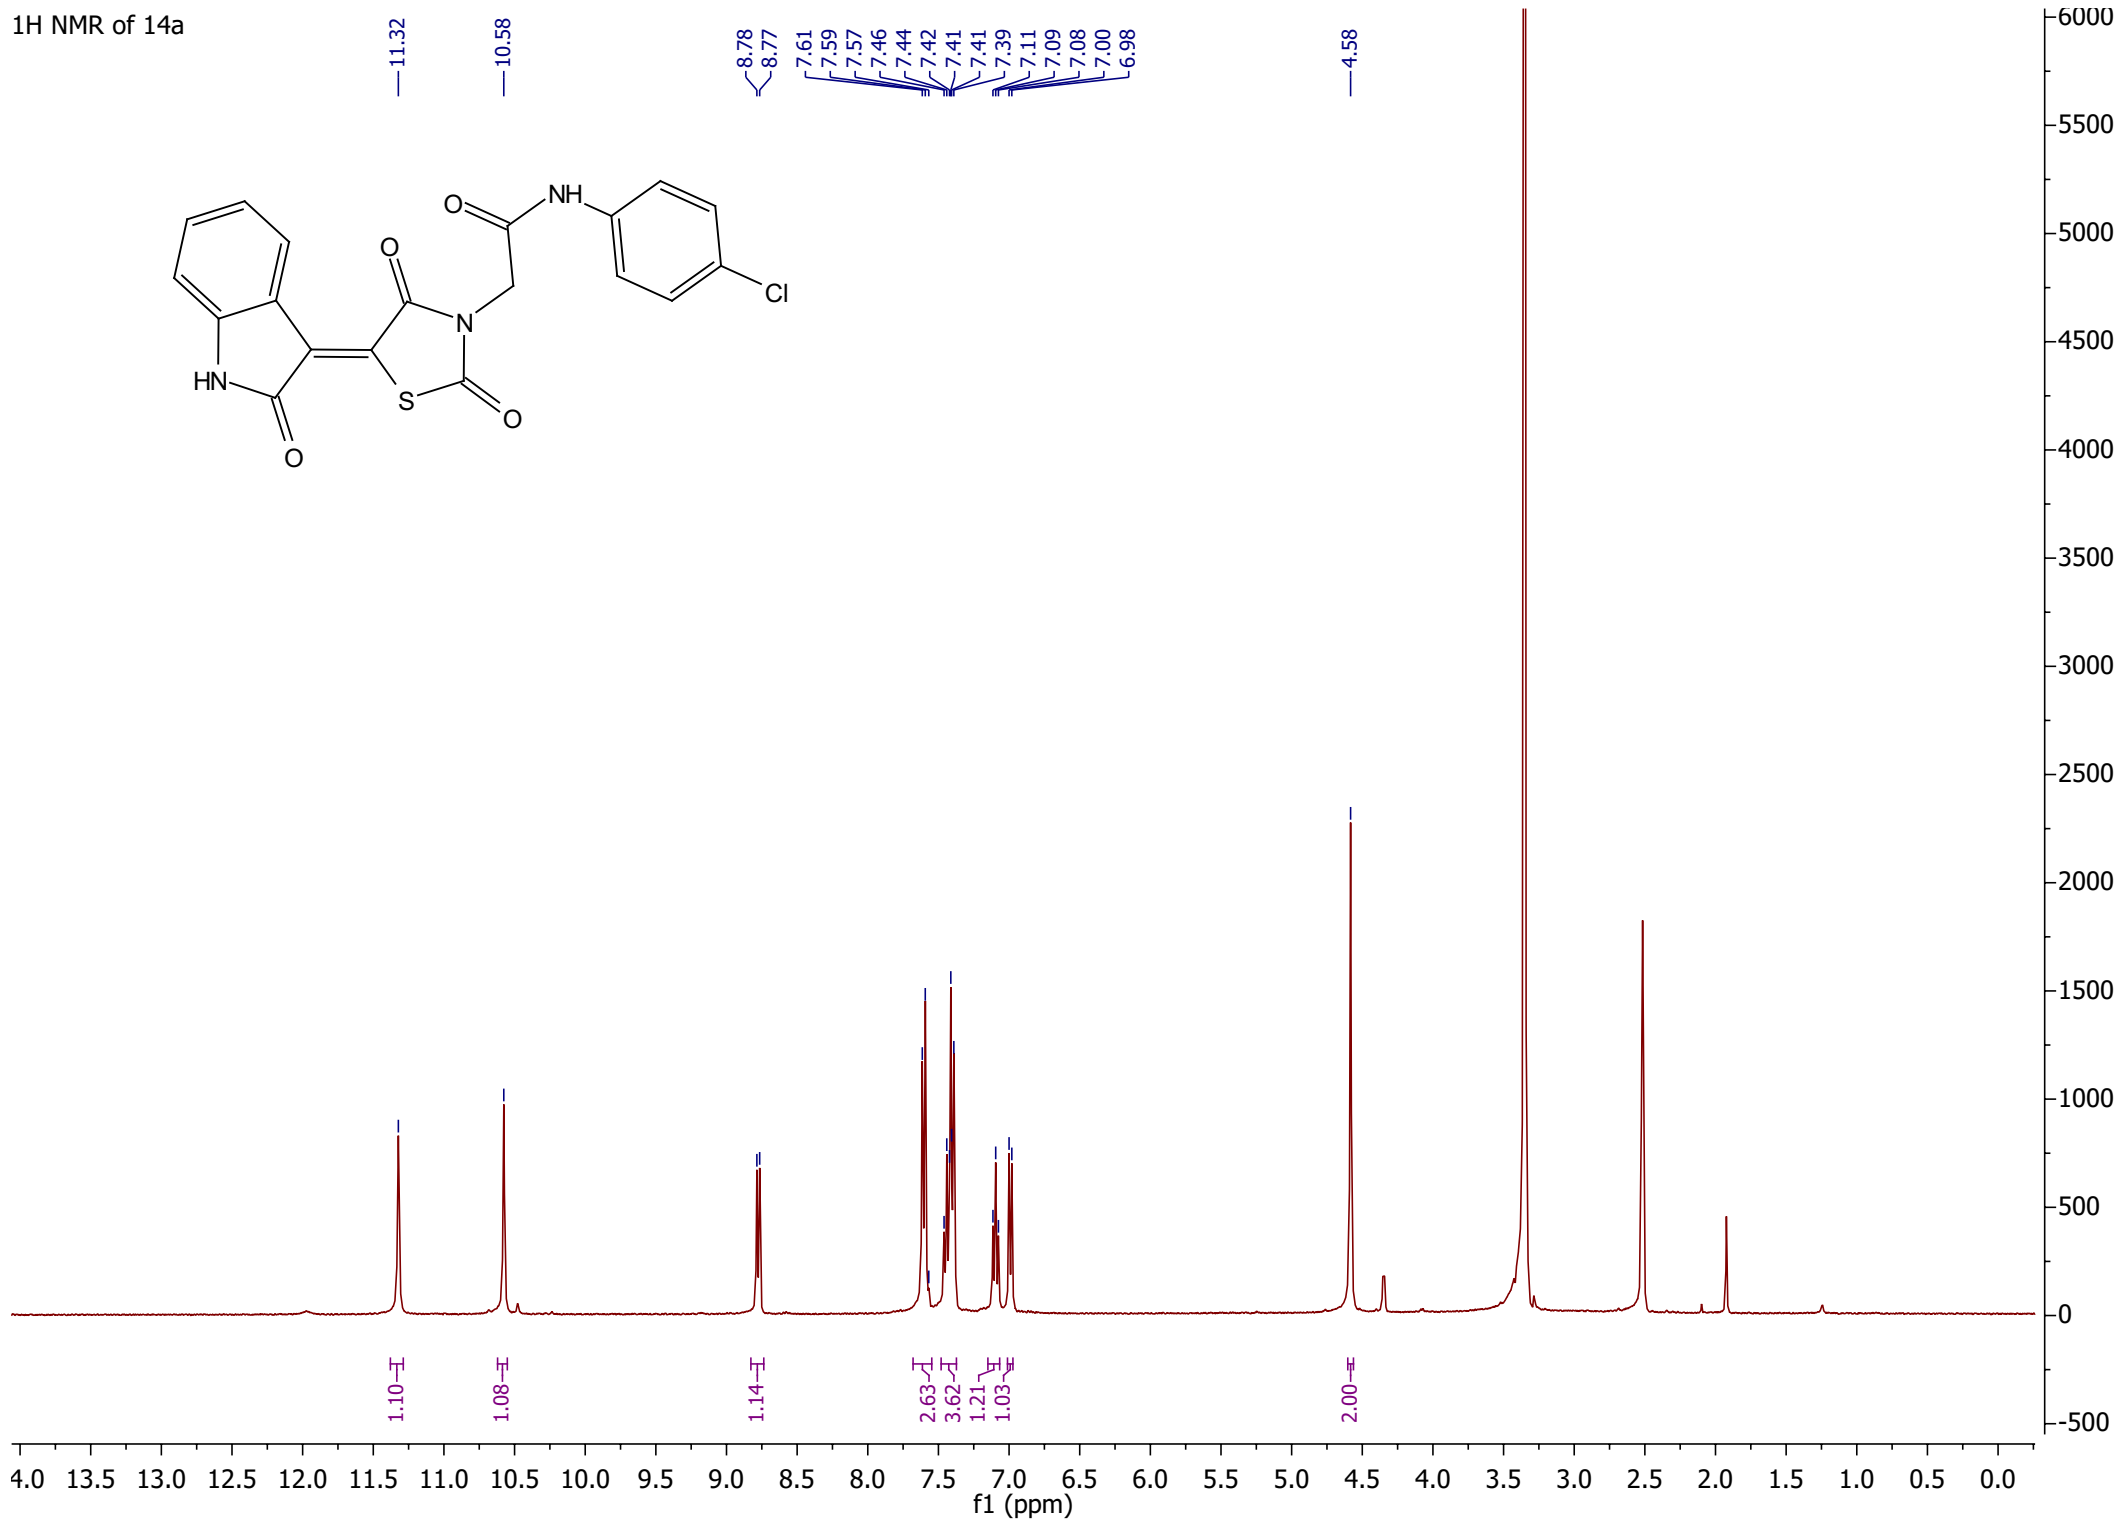

1H NMR of 14a



7.61  
7.59  
7.57  
7.46  
7.44  
7.42  
7.41  
7.41  
7.39  
7.11  
7.09  
7.08  
7.00  
6.98

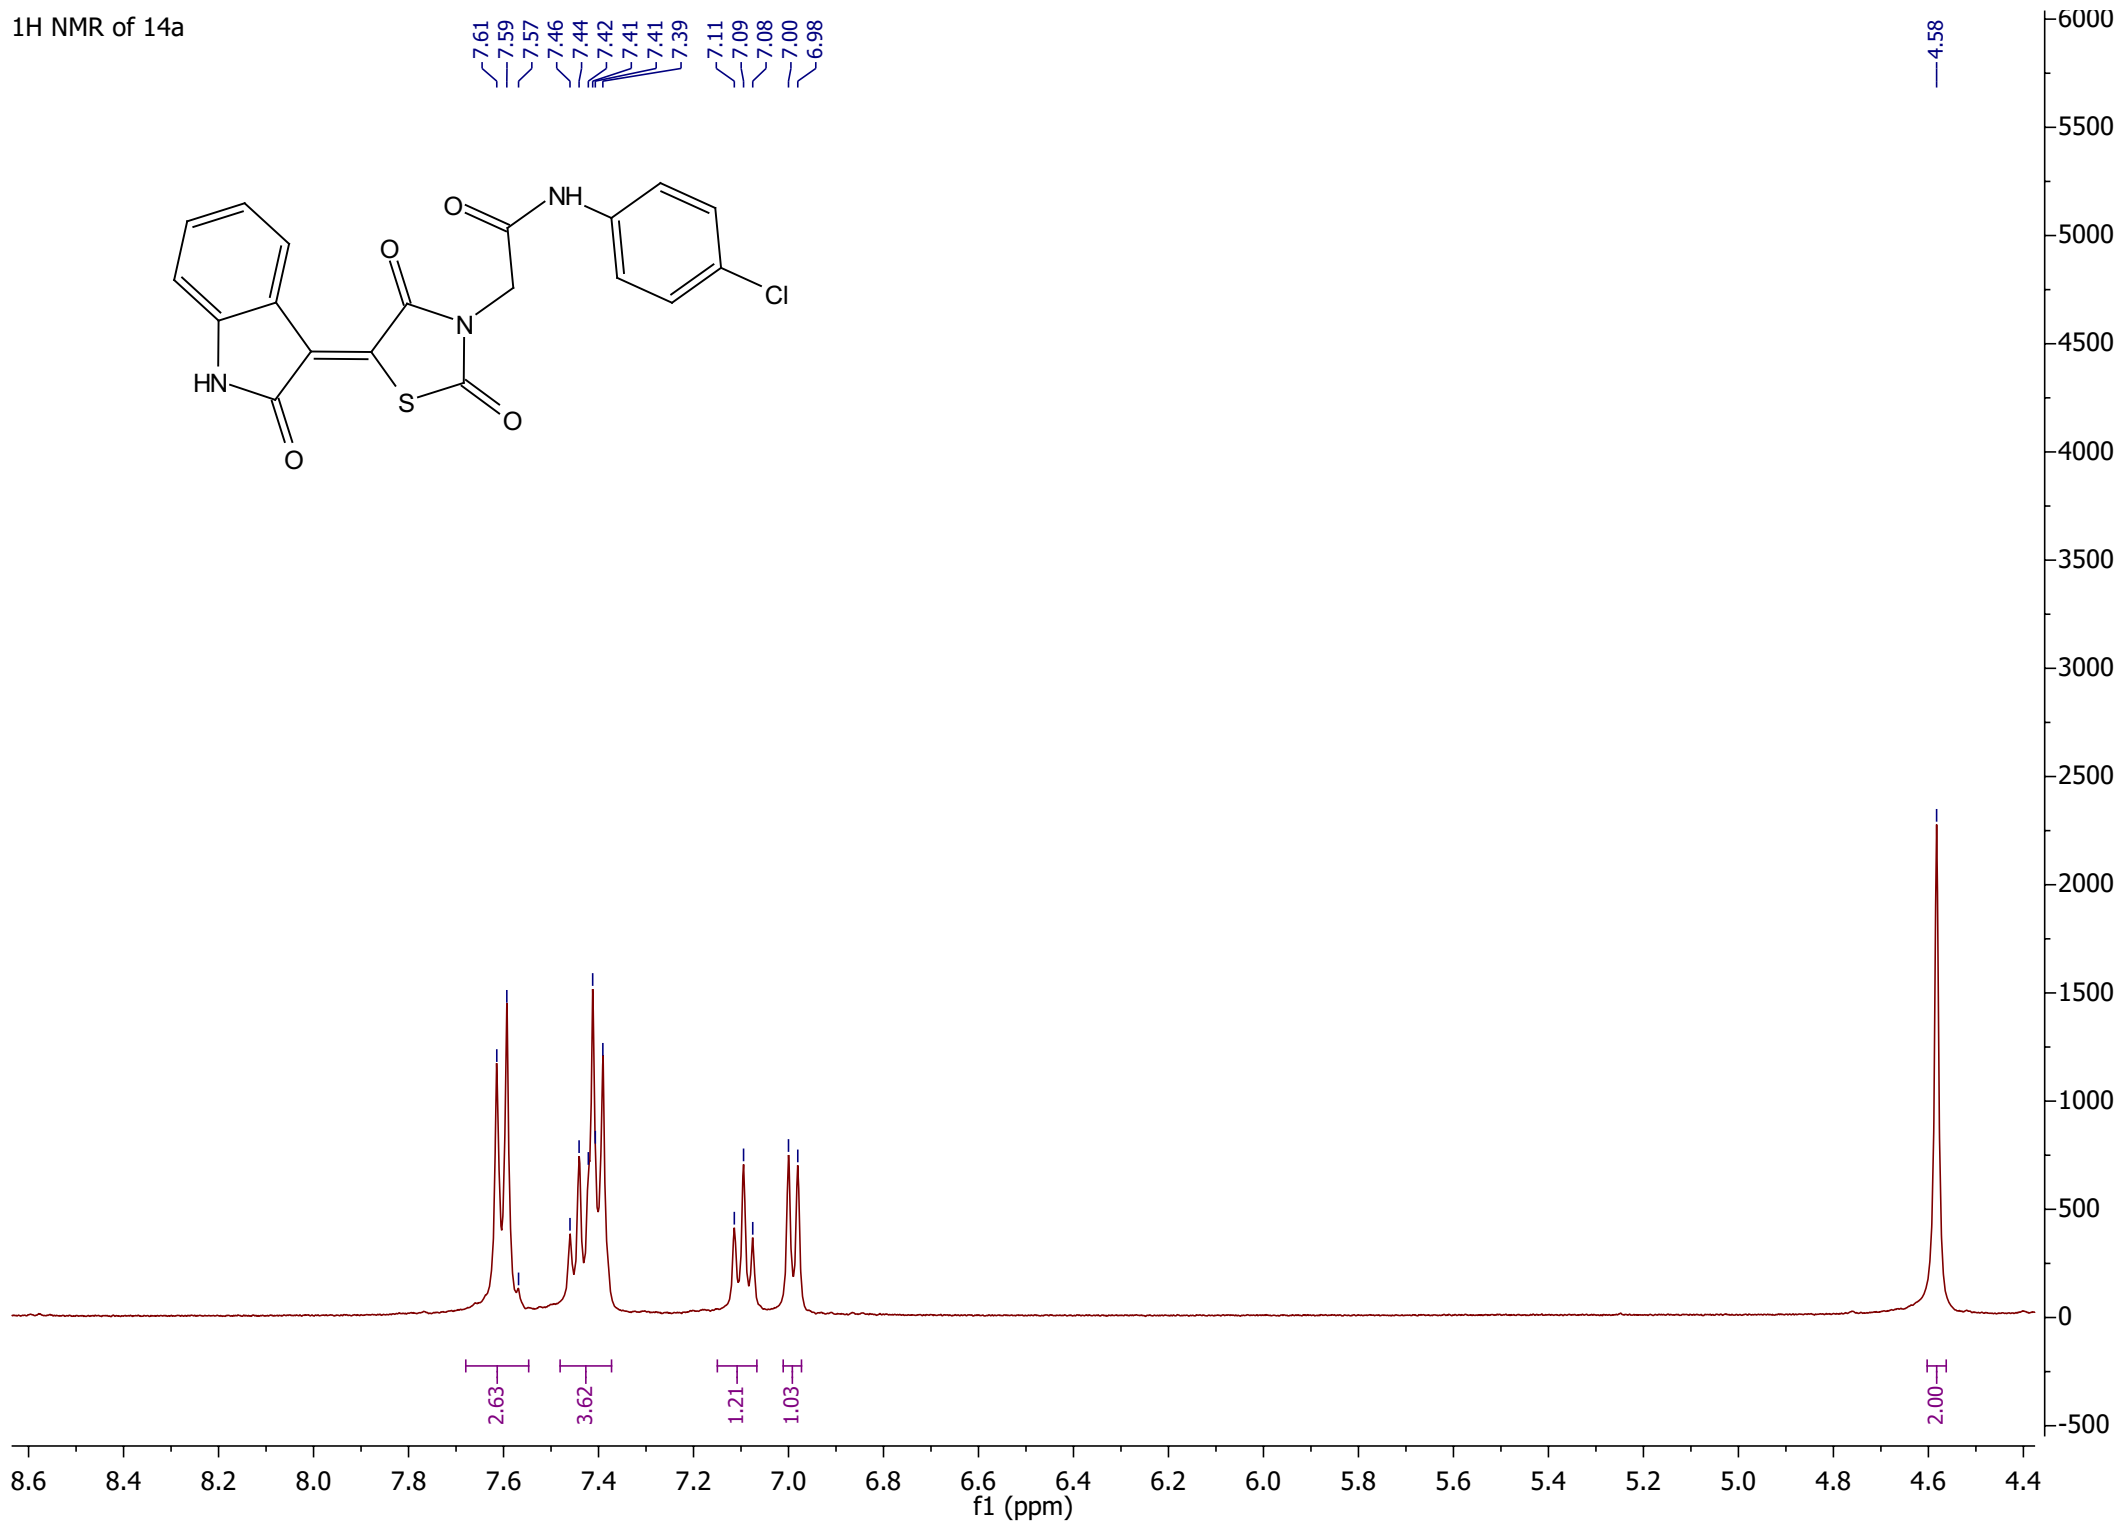

1H NMR of 14a

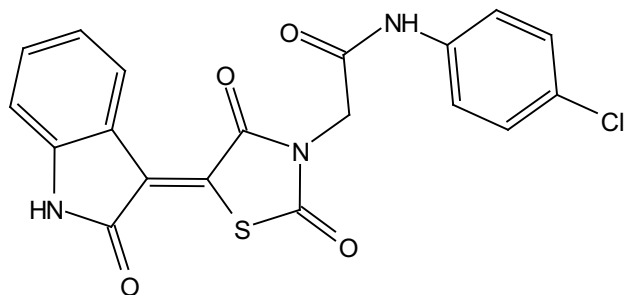

—11.32

—10.58

8.78  
8.77

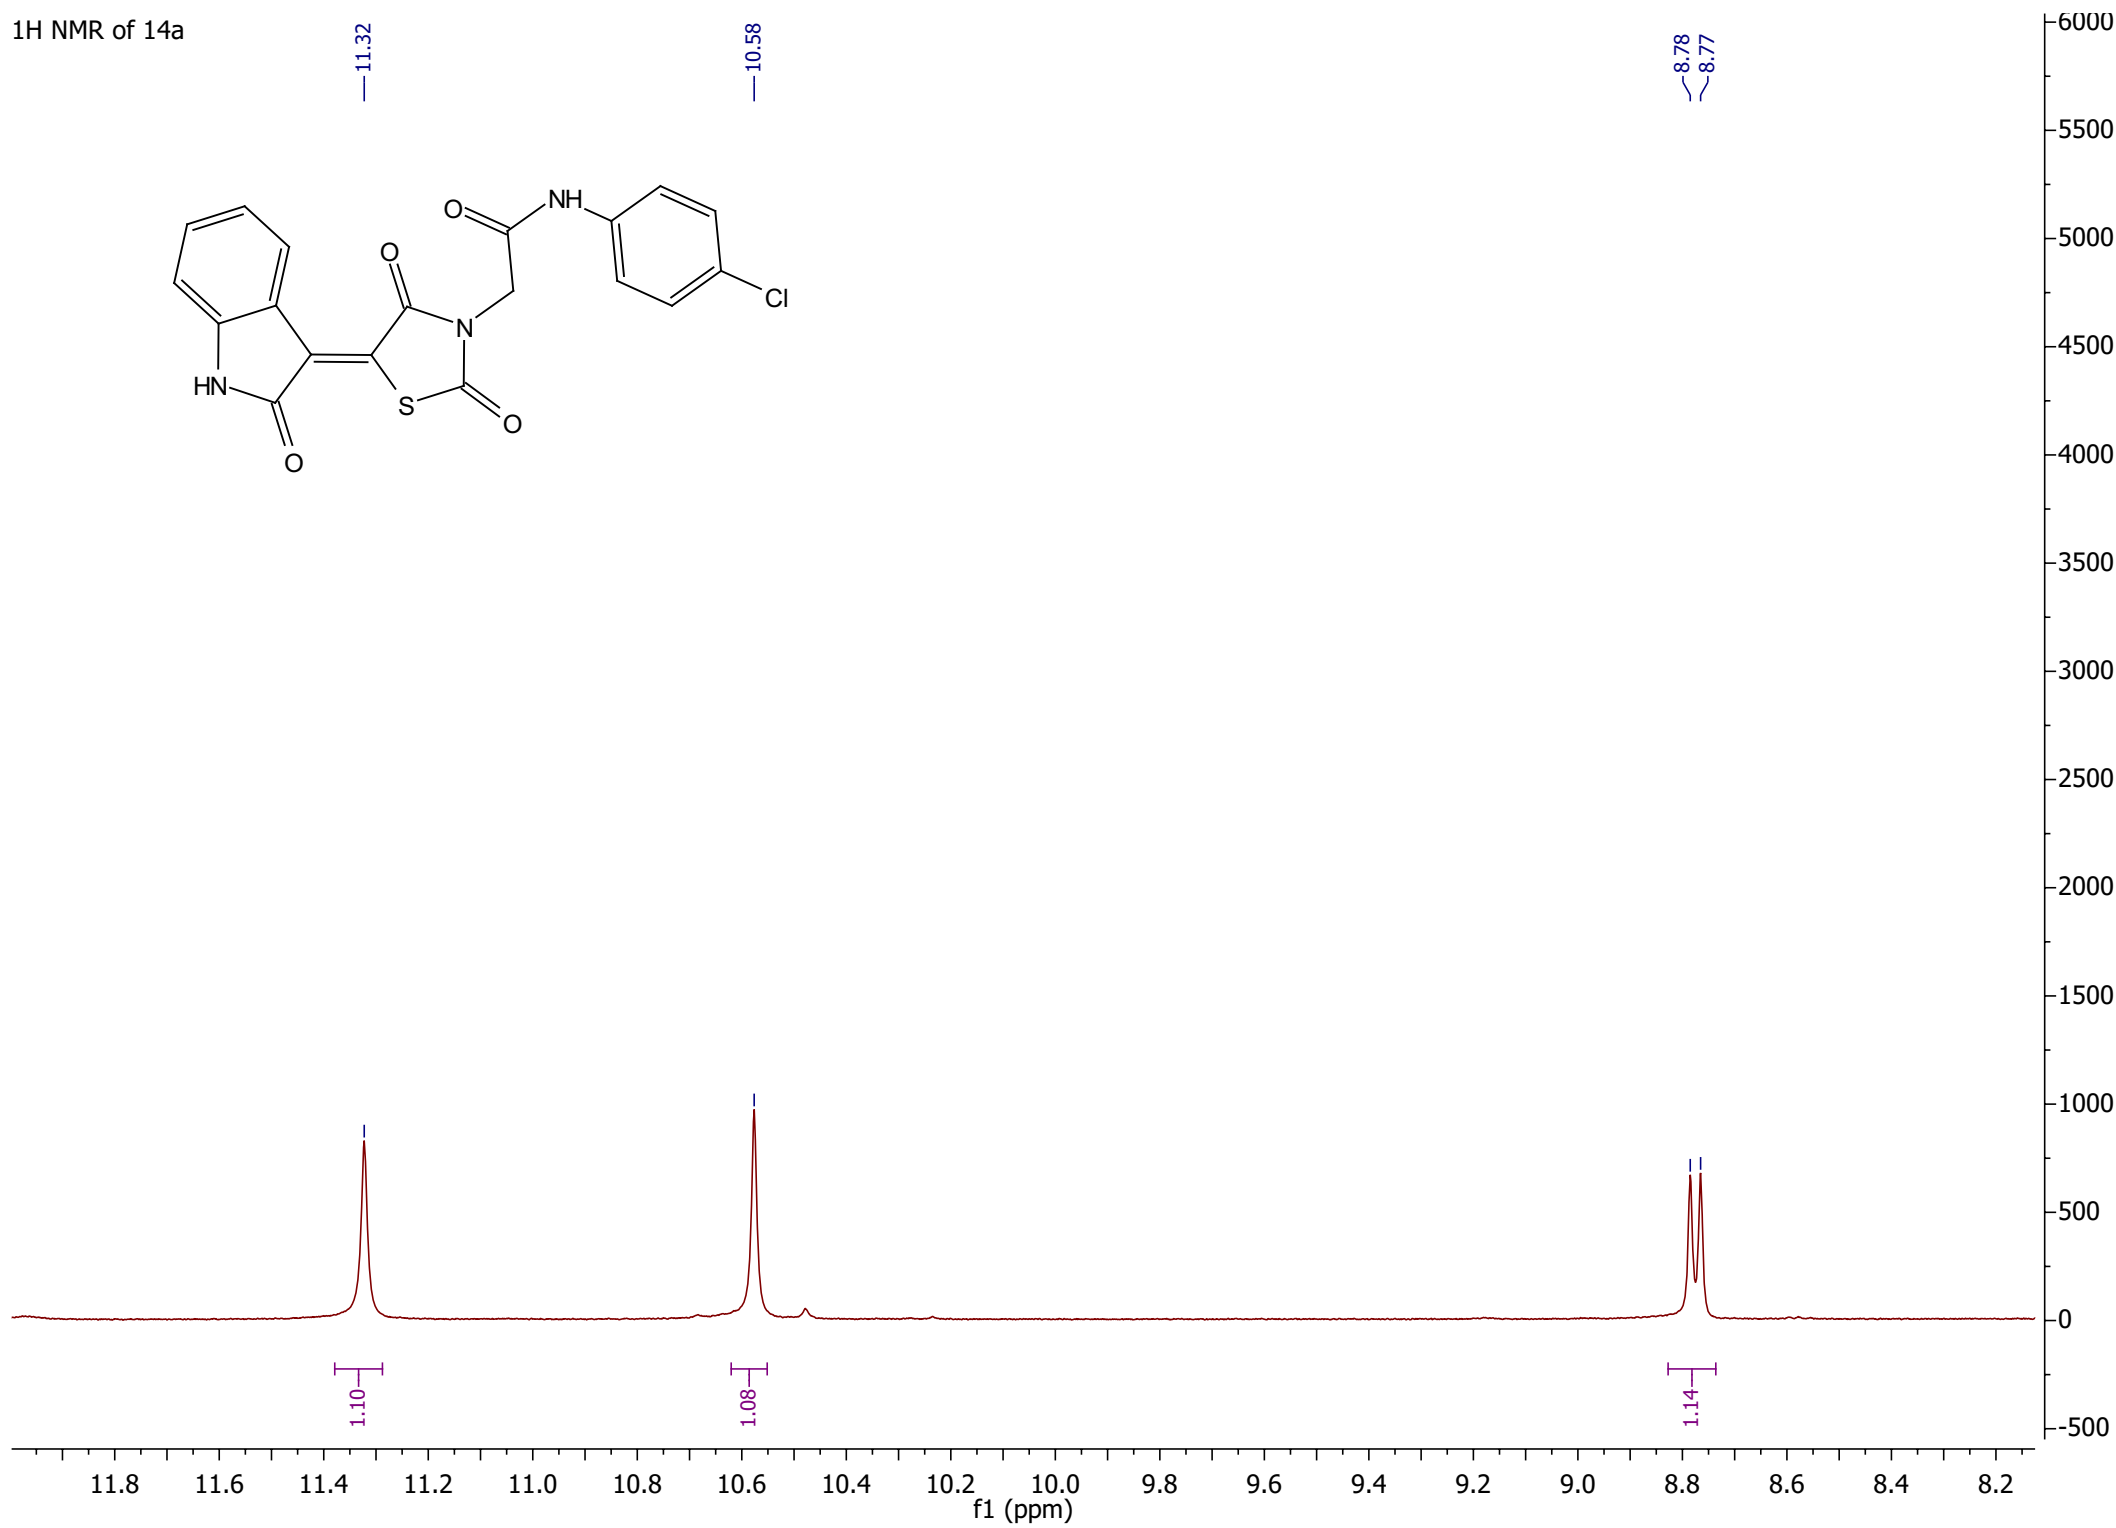

1H NMR of 14b

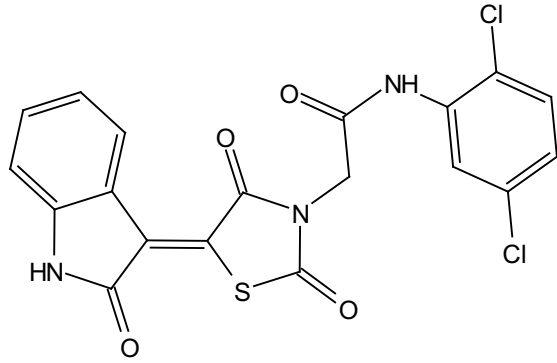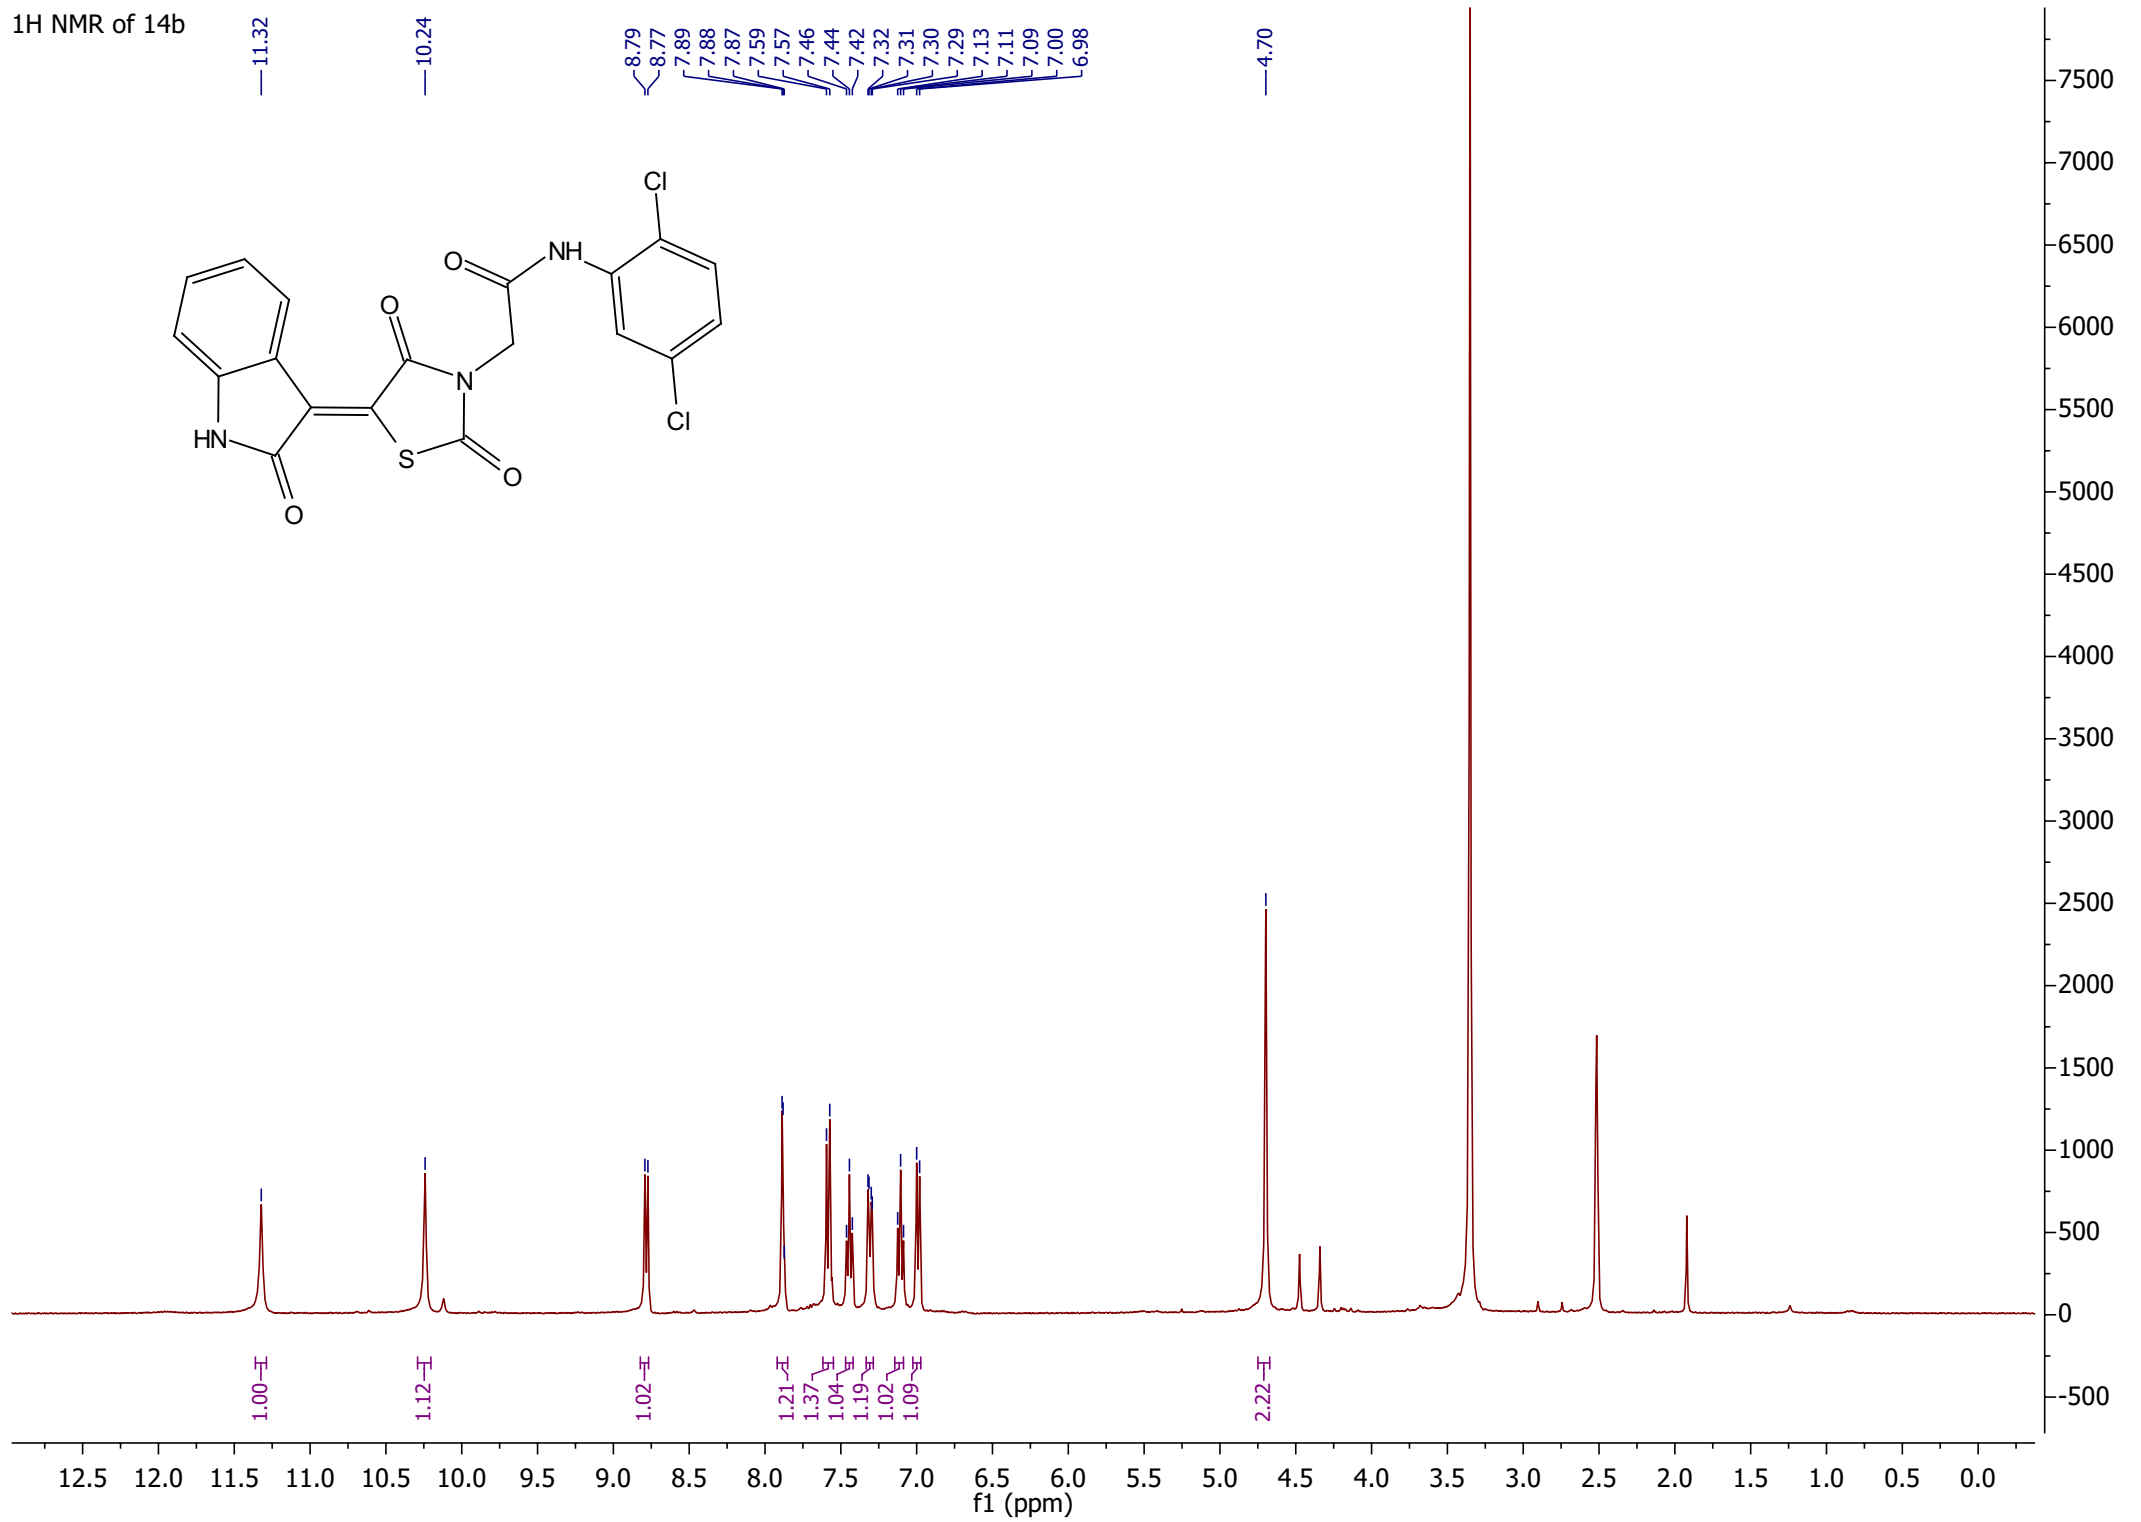

1H NMR of 14b



8.79  
8.77

7.89  
7.88  
7.87  
7.59  
7.57  
7.46  
7.44  
7.42  
7.32  
7.31  
7.30  
7.29  
7.13  
7.11  
7.09  
7.00  
6.98

4.70

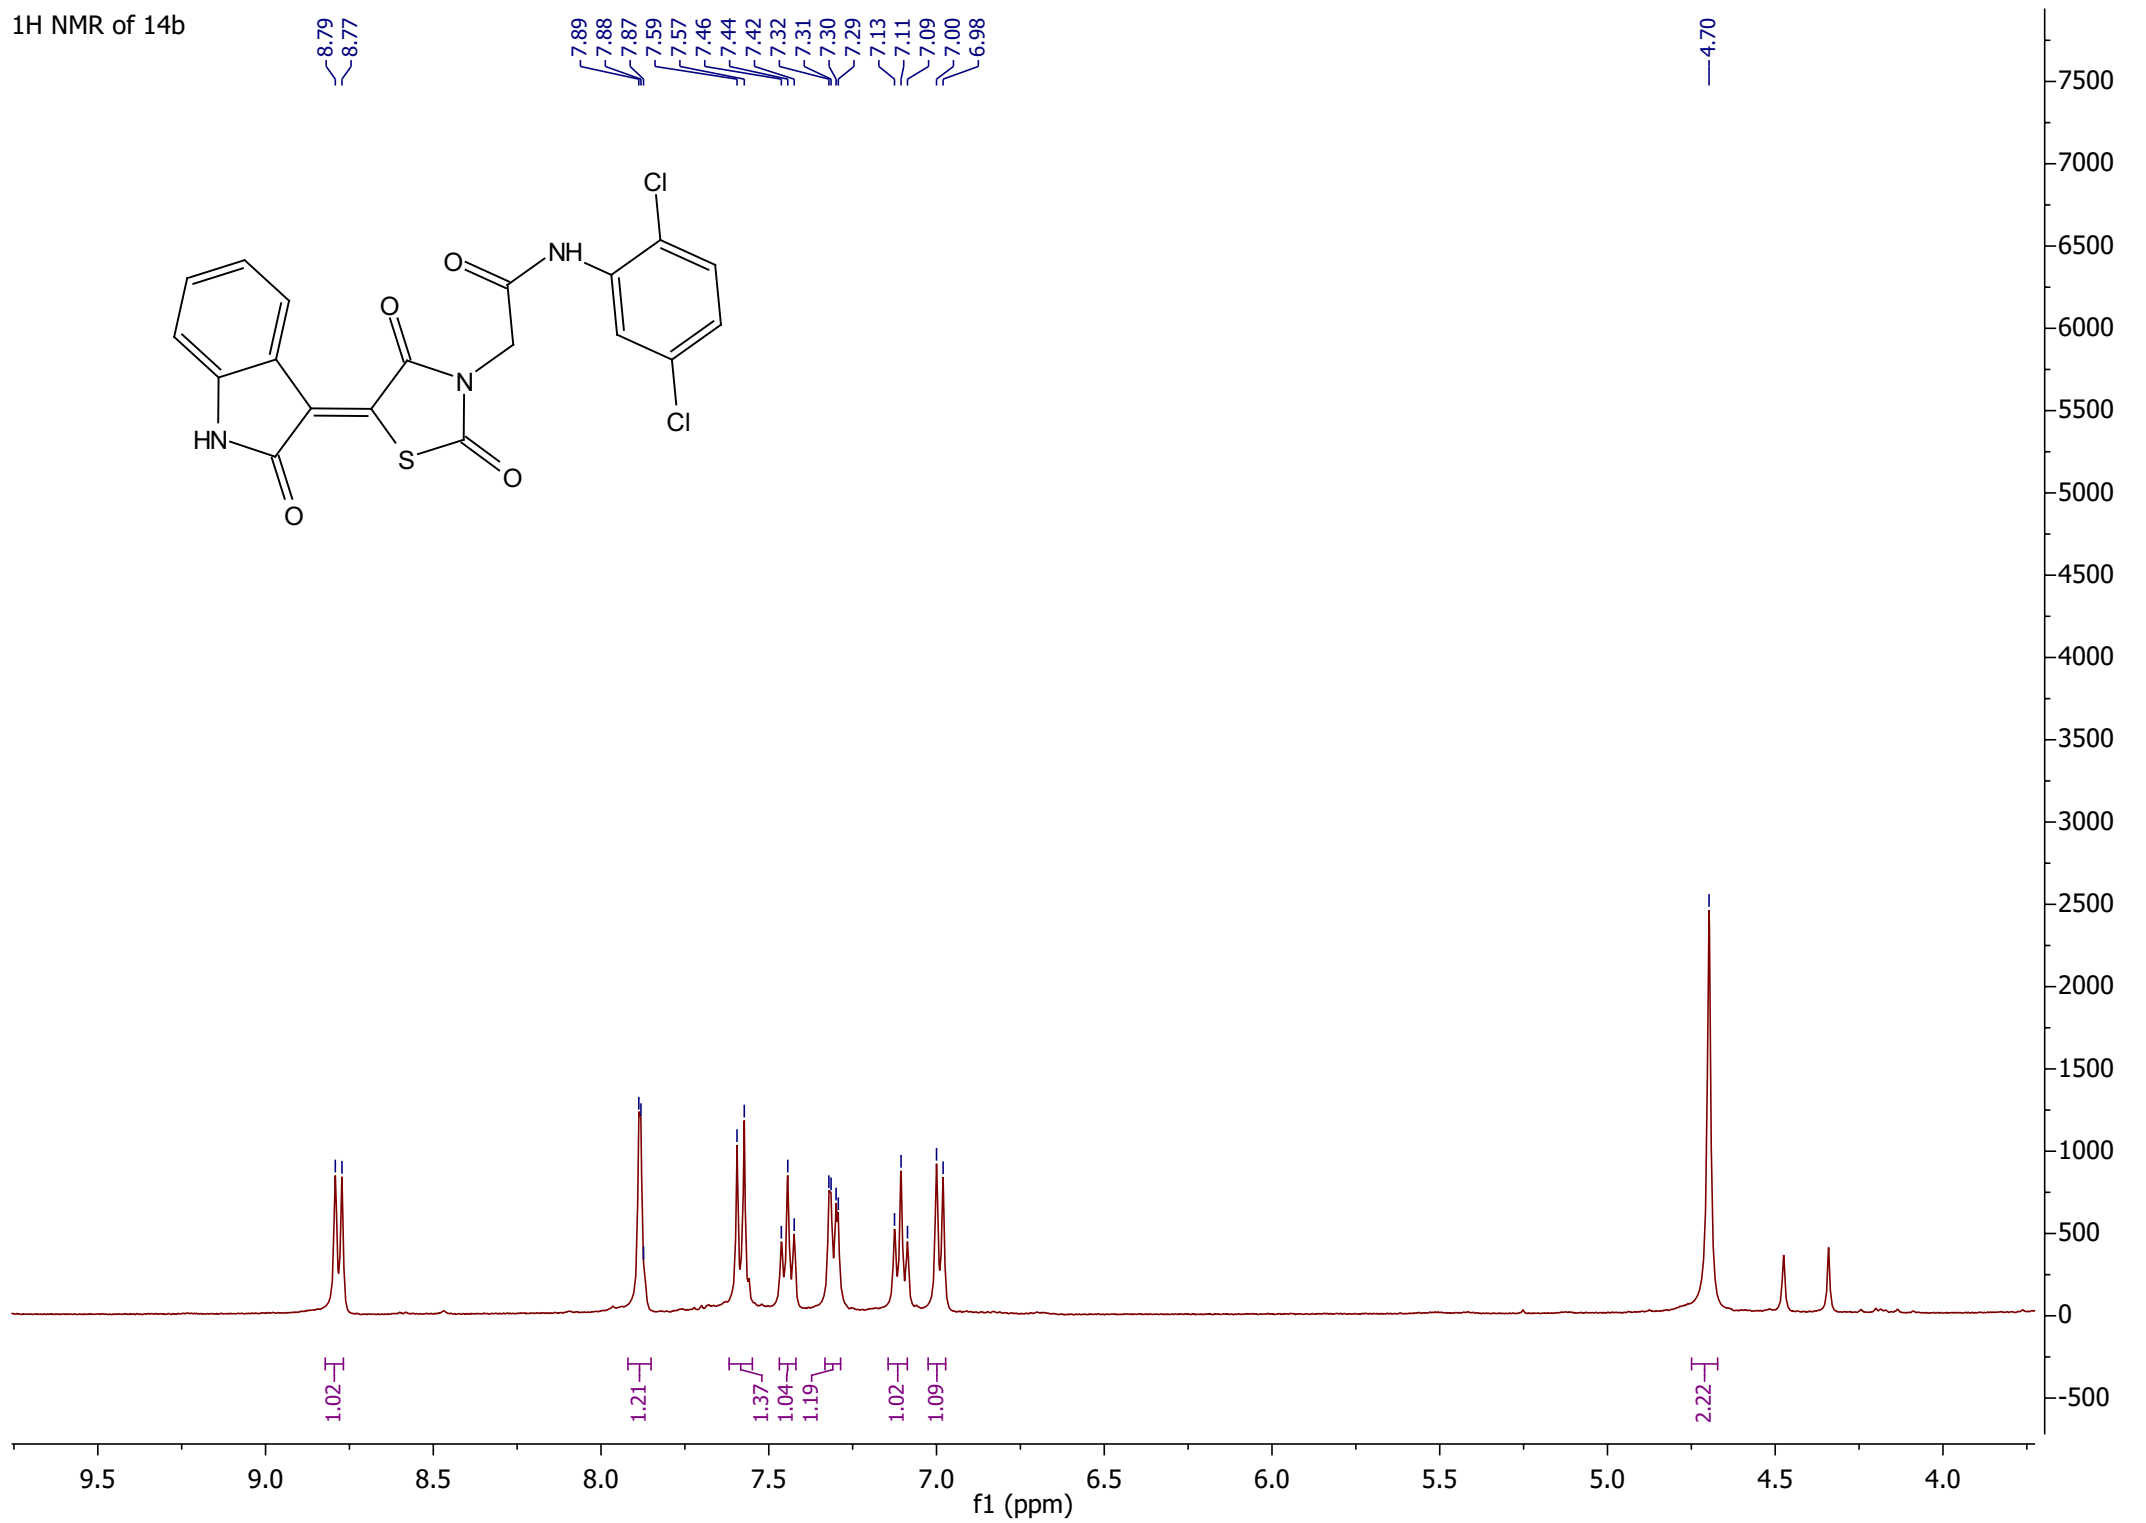



1H NMR of 14b

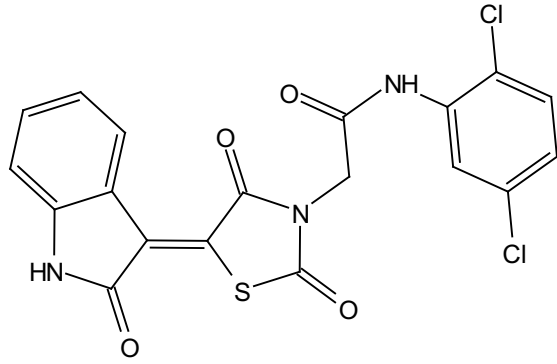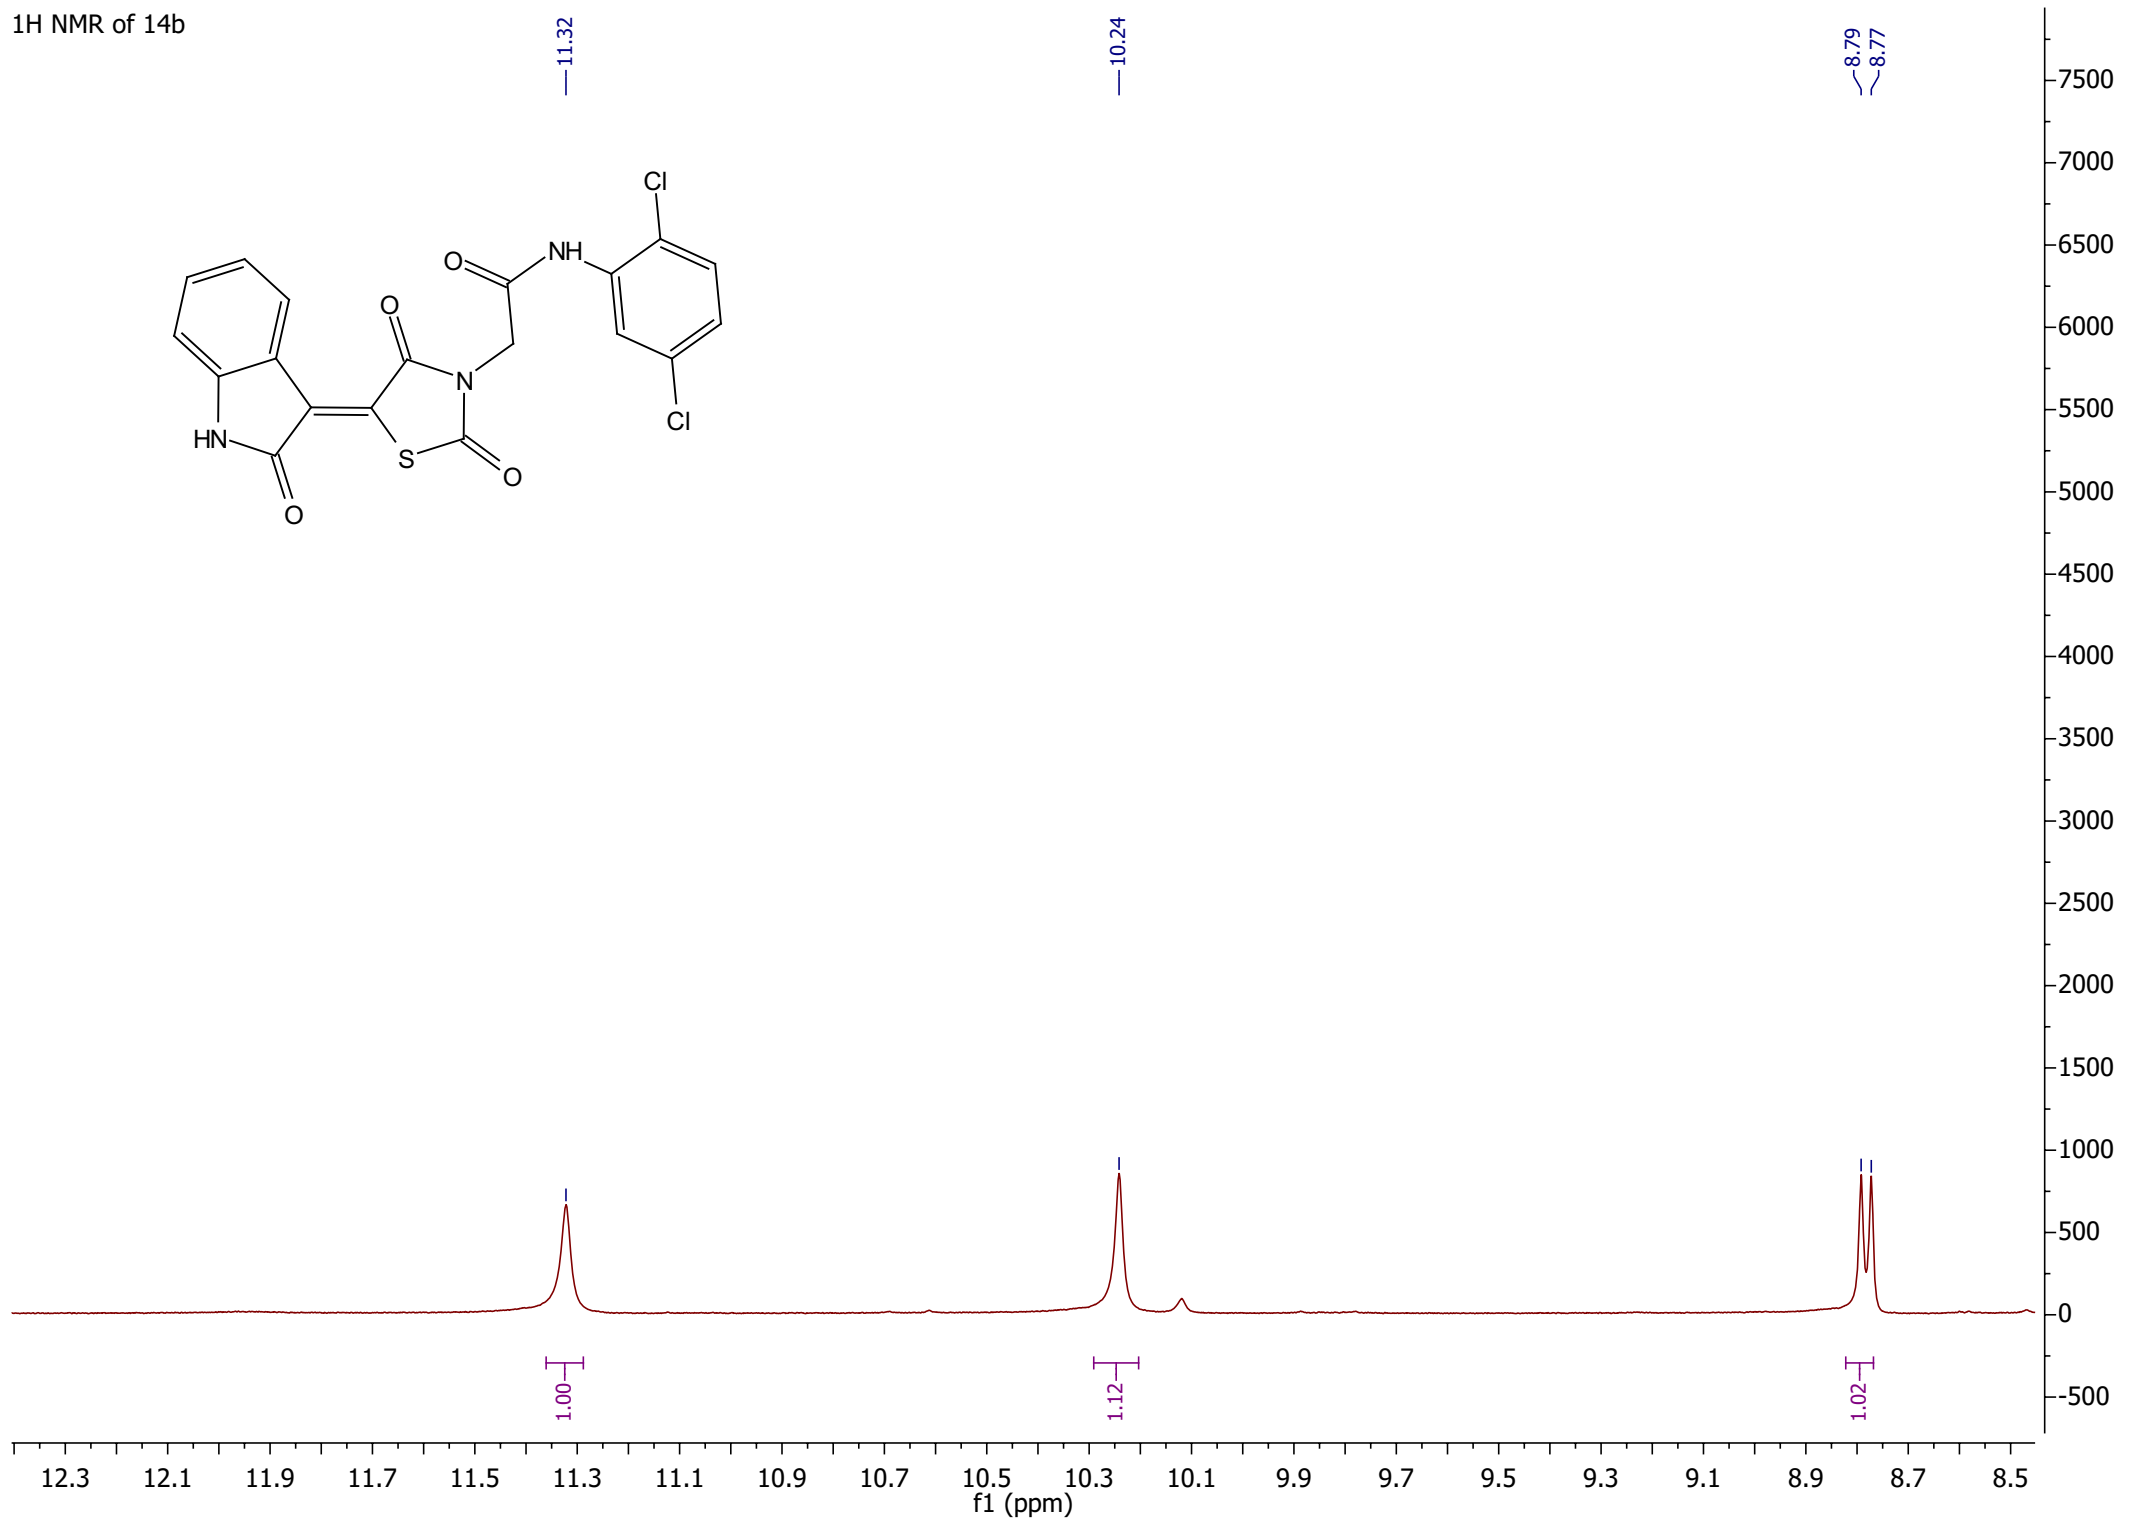

1H NMR of 14c

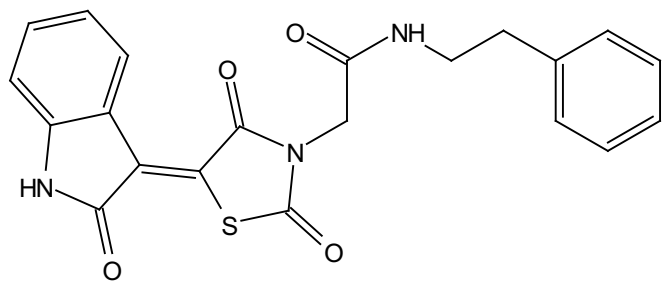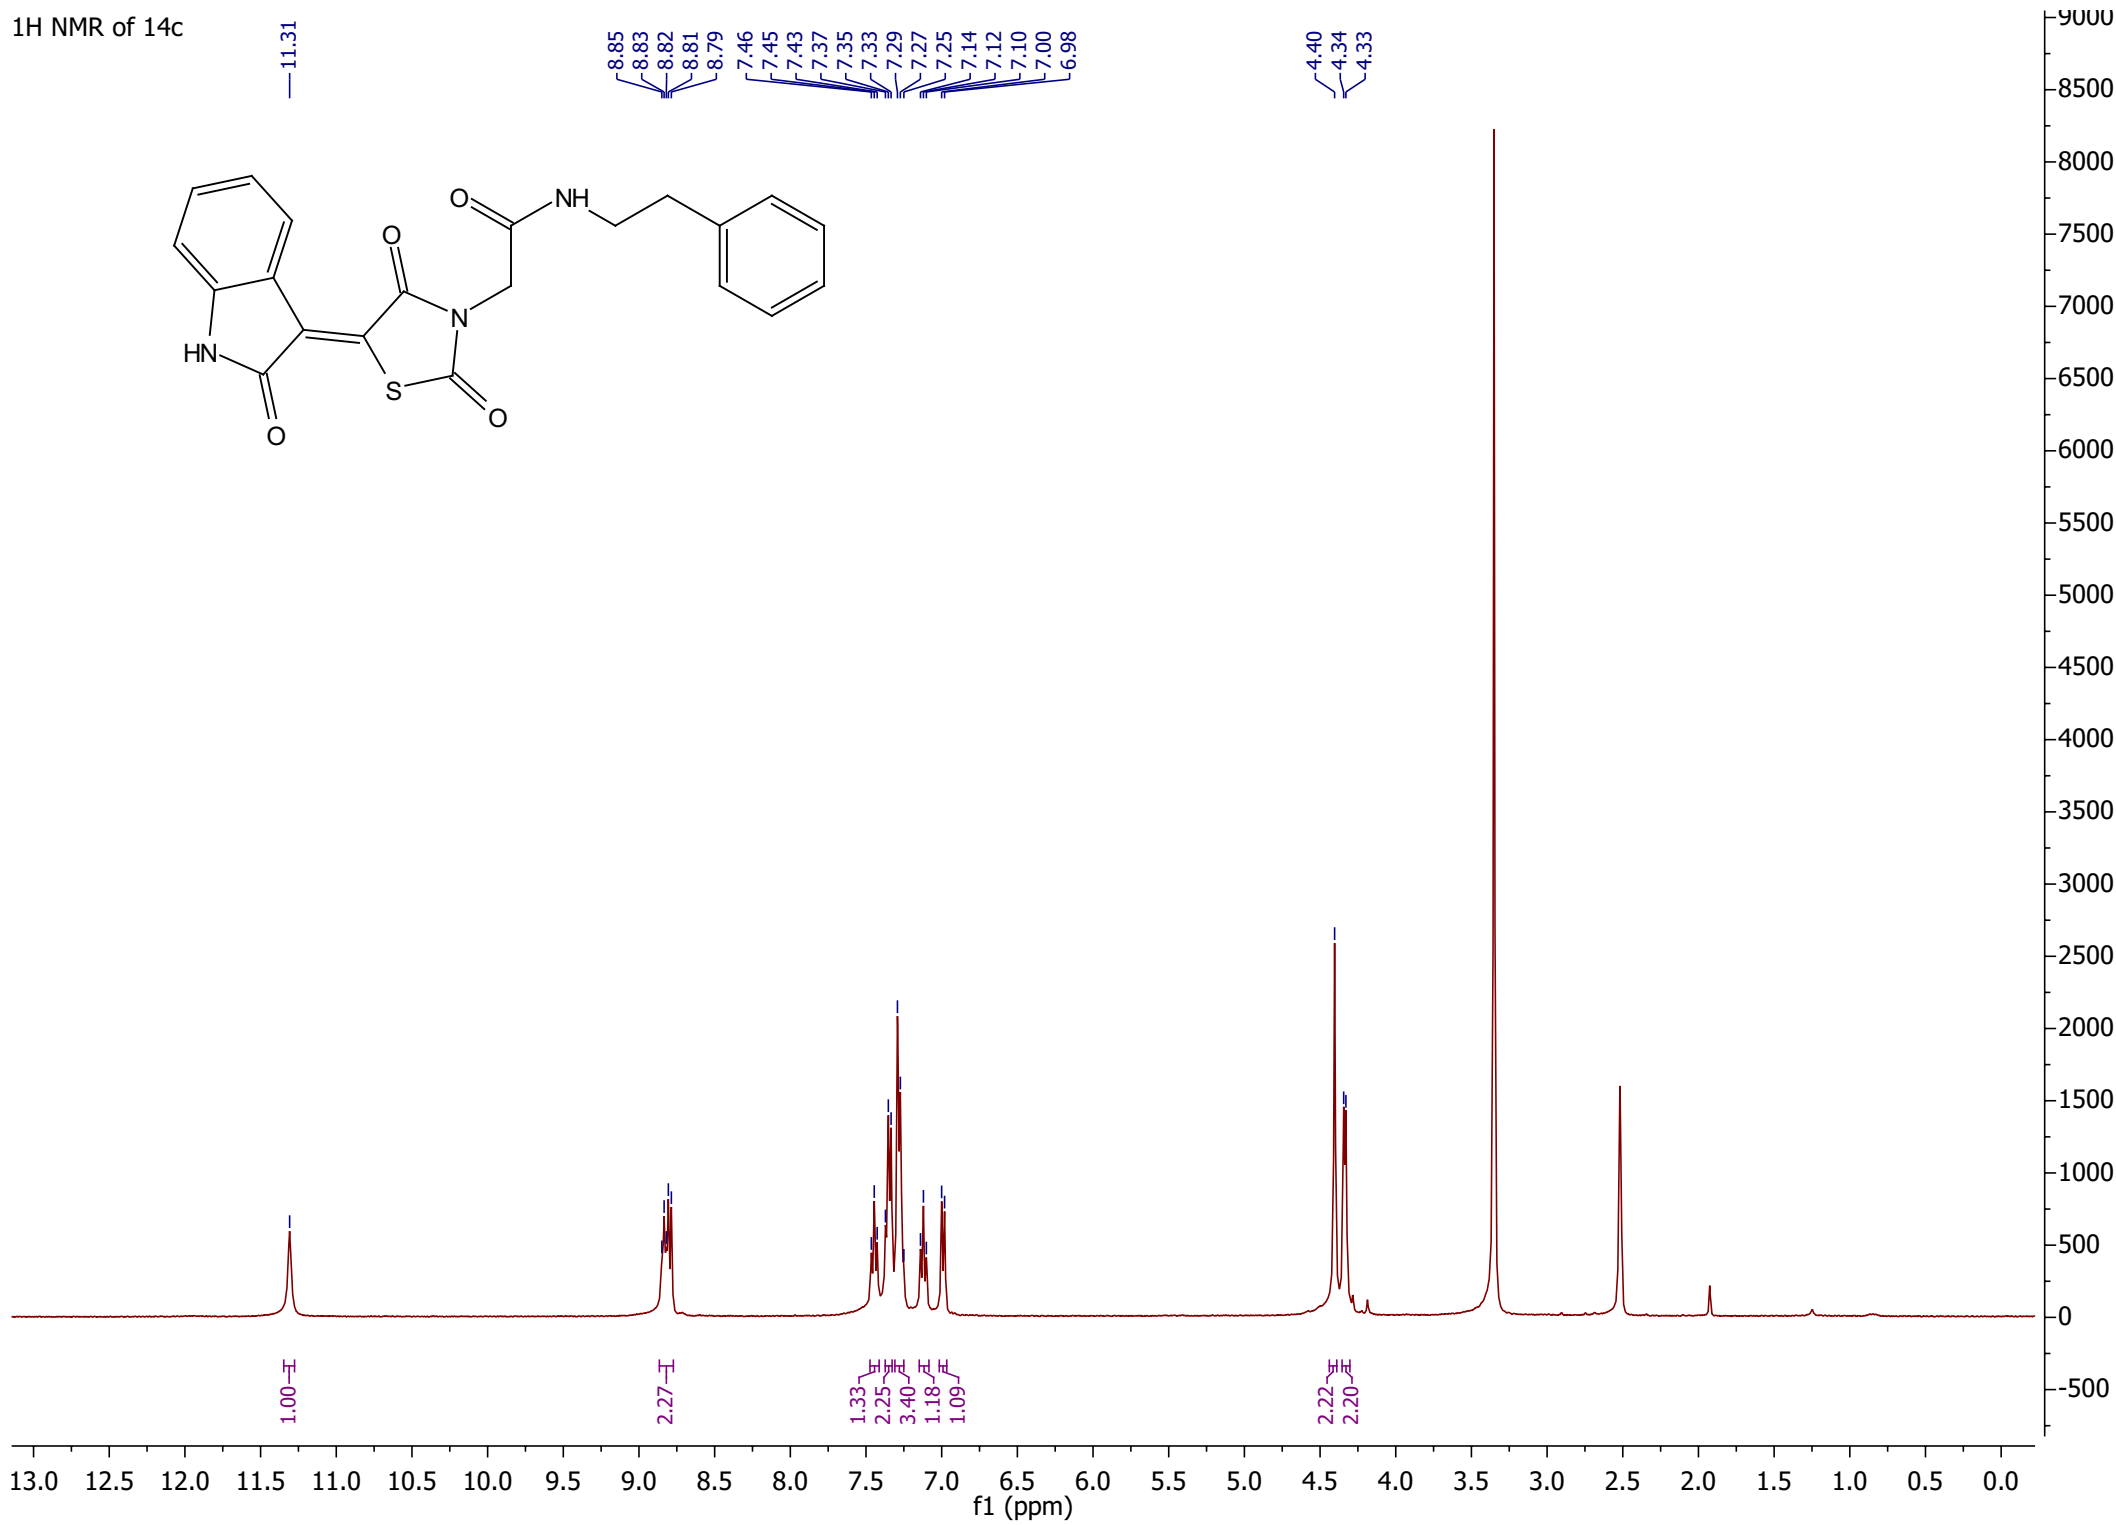

1H NMR of 14c

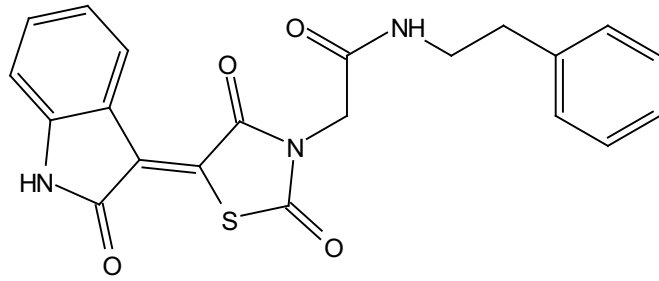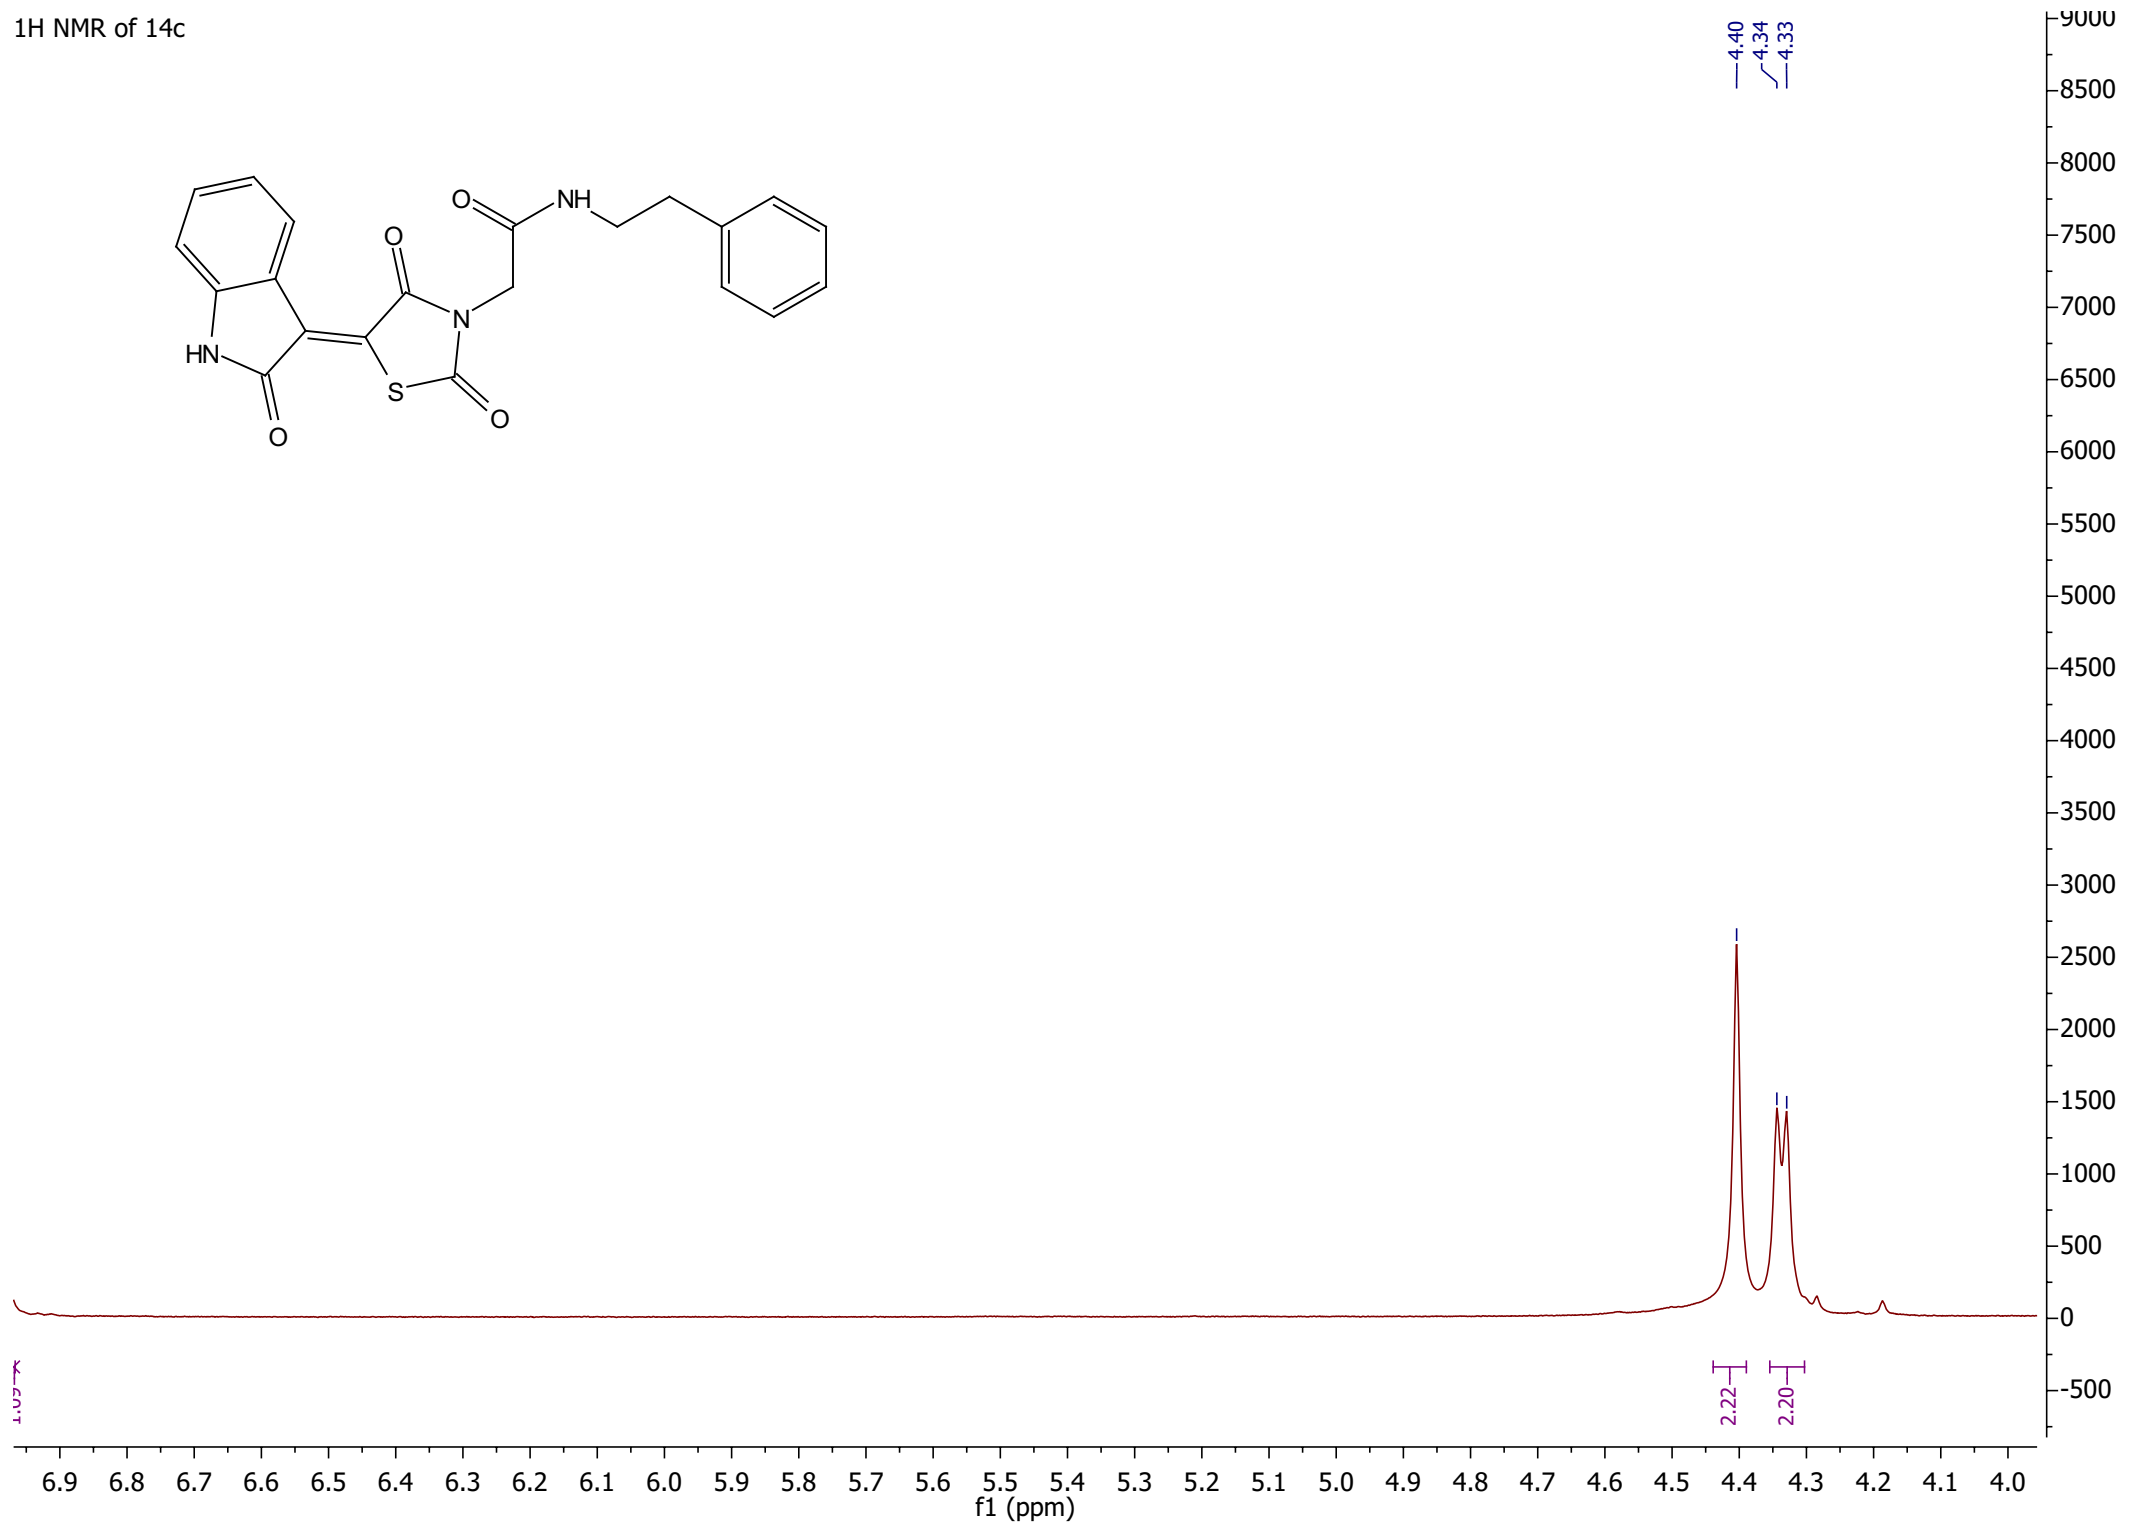

1H NMR of 14c



11.31

8.85  
8.83  
8.82  
8.81  
8.79

7.46  
7.45  
7.43  
7.37  
7.35  
7.33  
7.29  
7.27  
7.25  
7.14  
7.12  
7.10  
7.00  
6.98

1.00

2.27

1.33

2.25

3.40

1.18

1.09

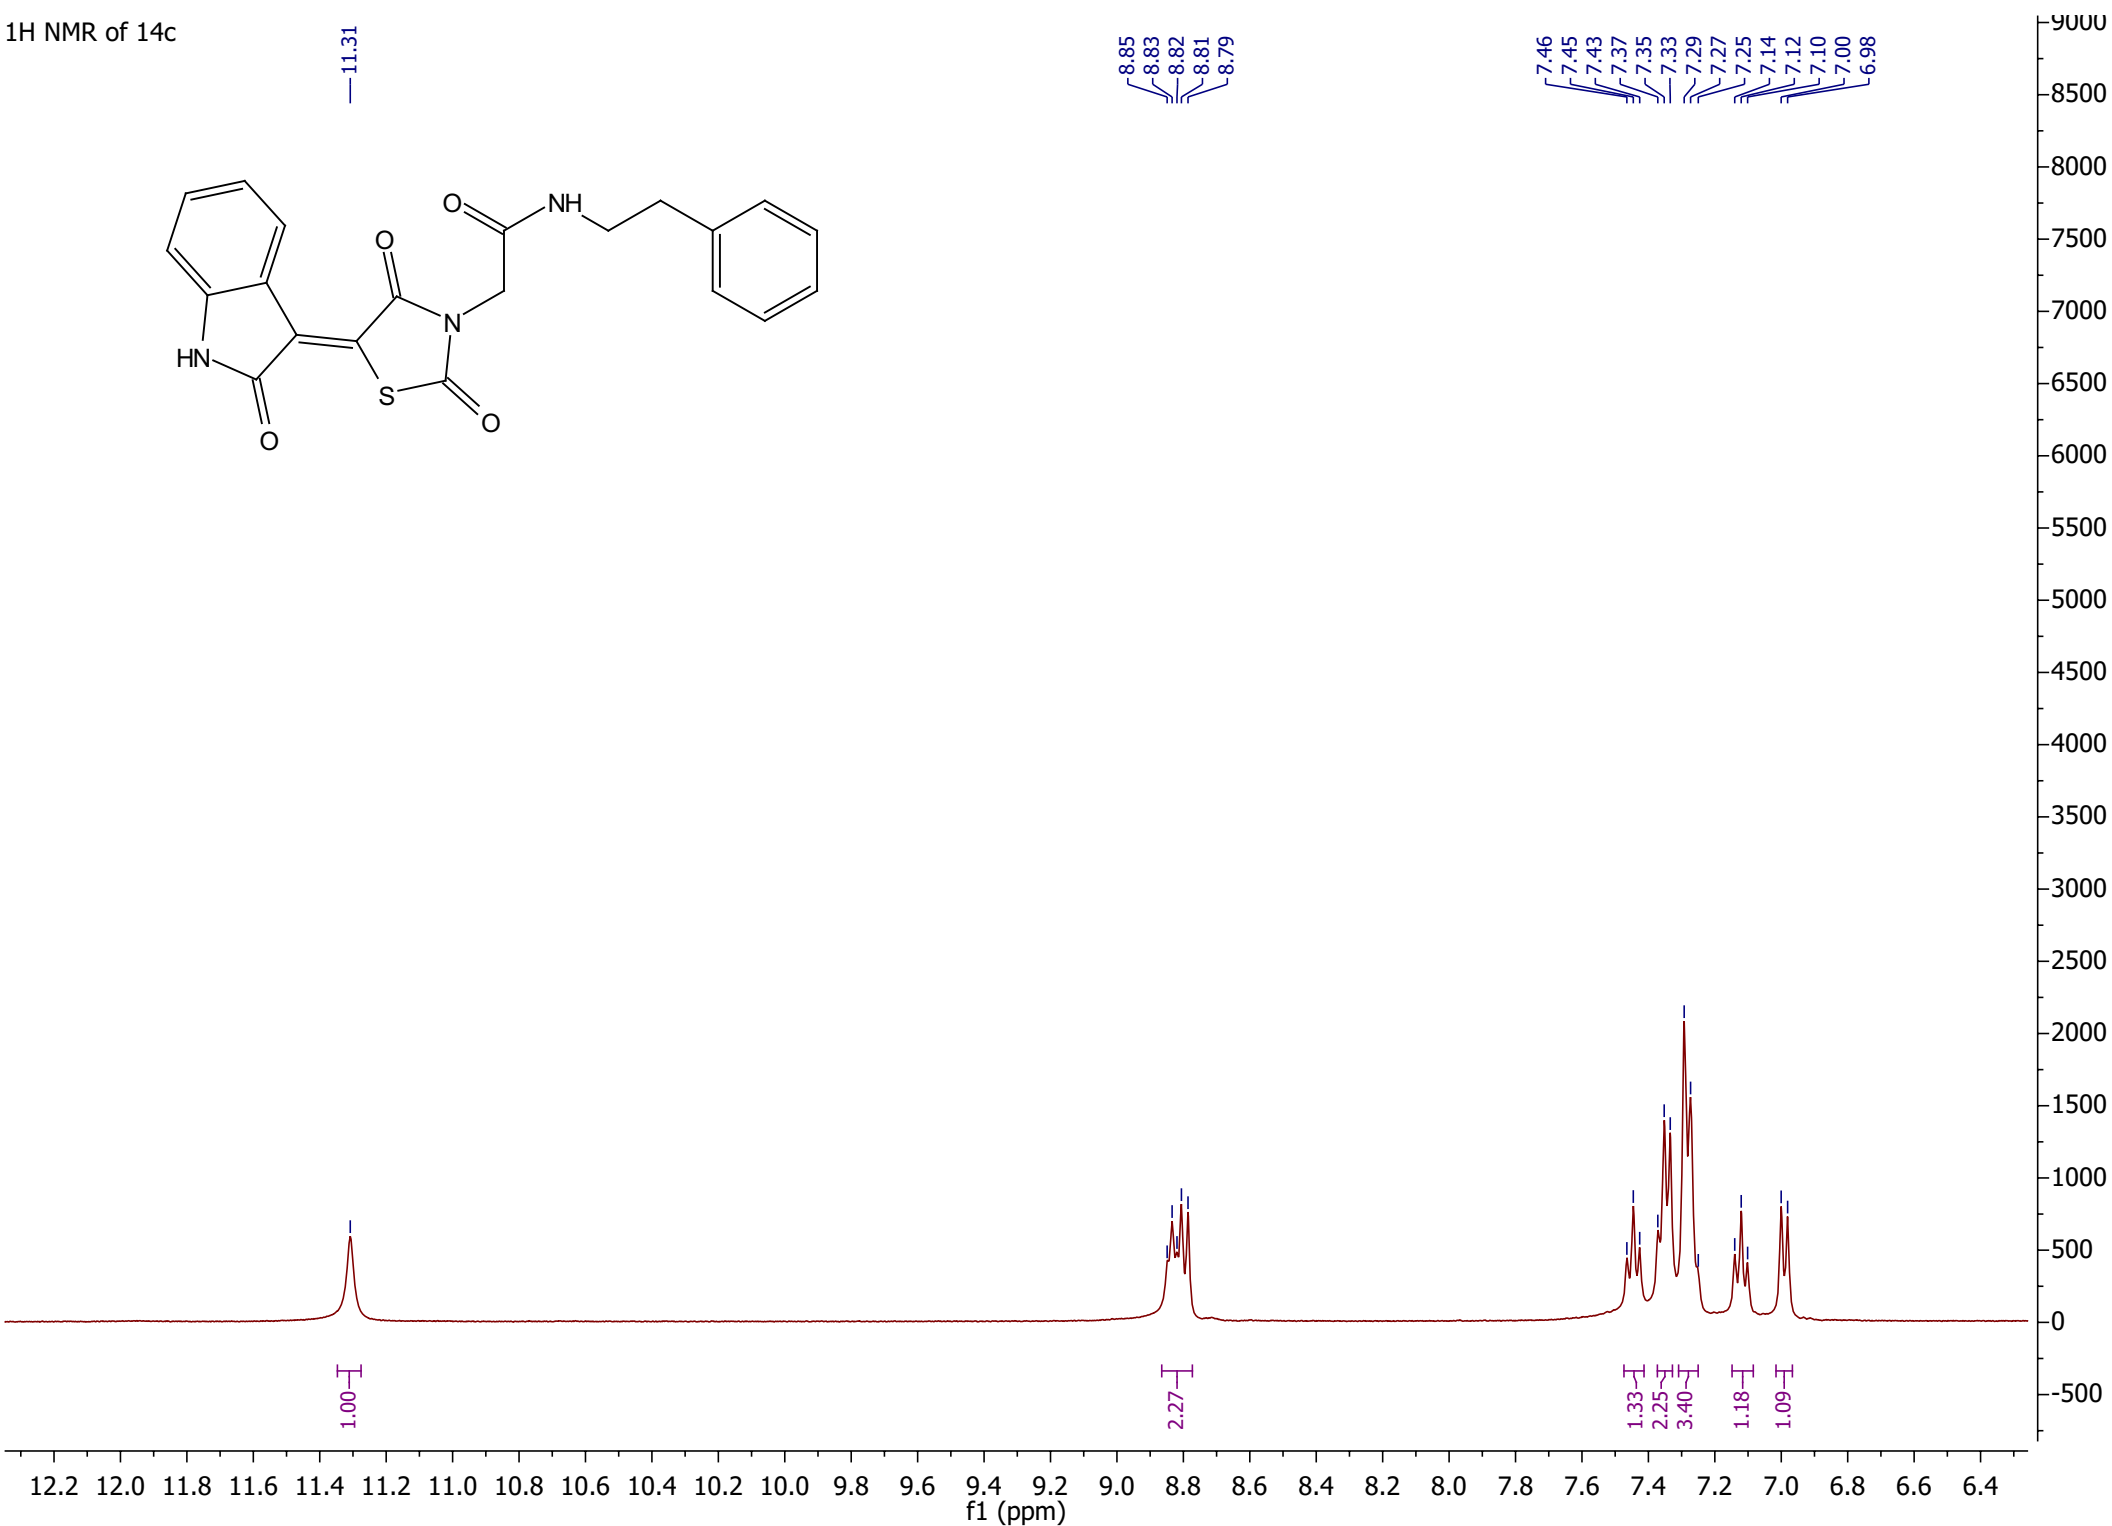

<sup>13</sup>C NMR of 14a

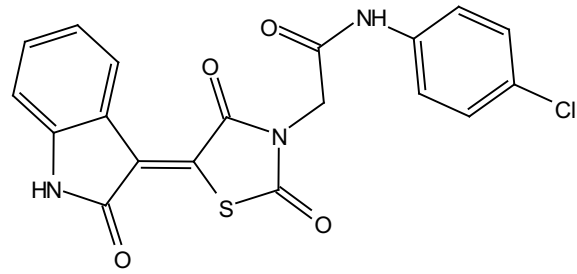

170.23  
168.72  
165.68  
164.47  
144.64  
137.78  
133.59  
129.31  
128.43  
128.25  
127.83  
122.68  
121.28  
120.22  
111.17

44.13  
40.60 DMSO  
40.39 DMSO  
40.18 DMSO  
39.93 DMSO  
39.77 DMSO  
39.56 DMSO  
39.35 DMSO

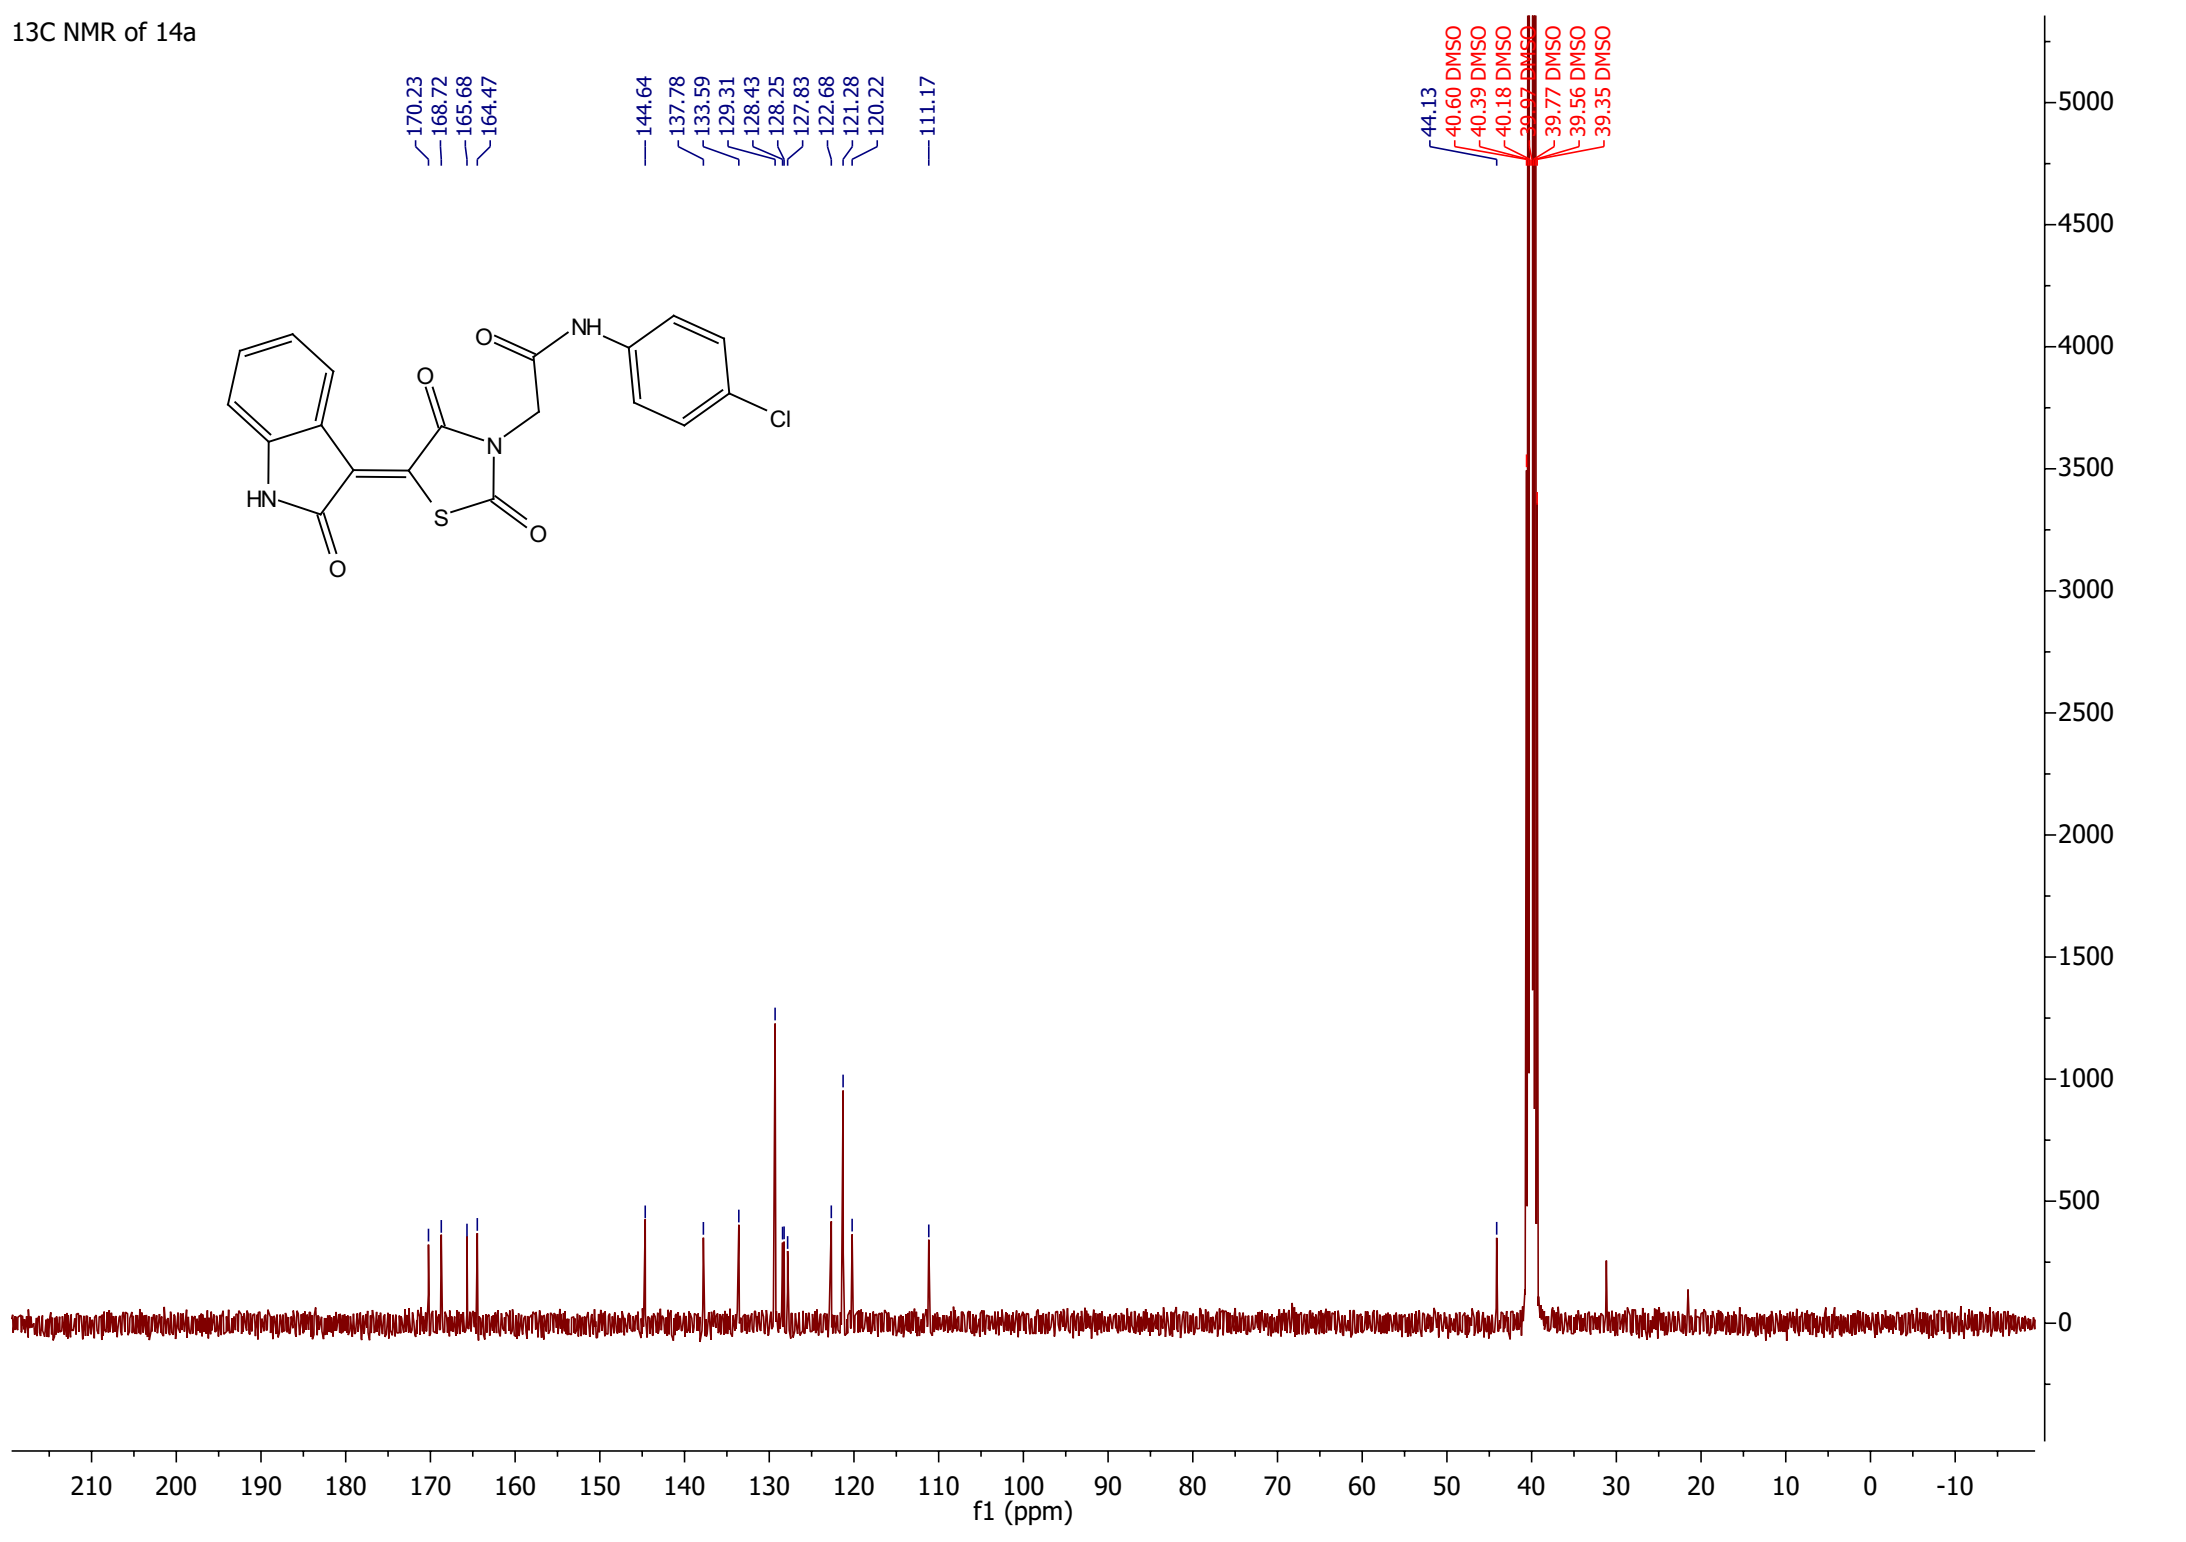

13C NMR of 14a

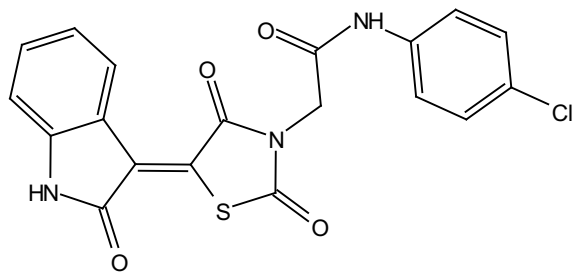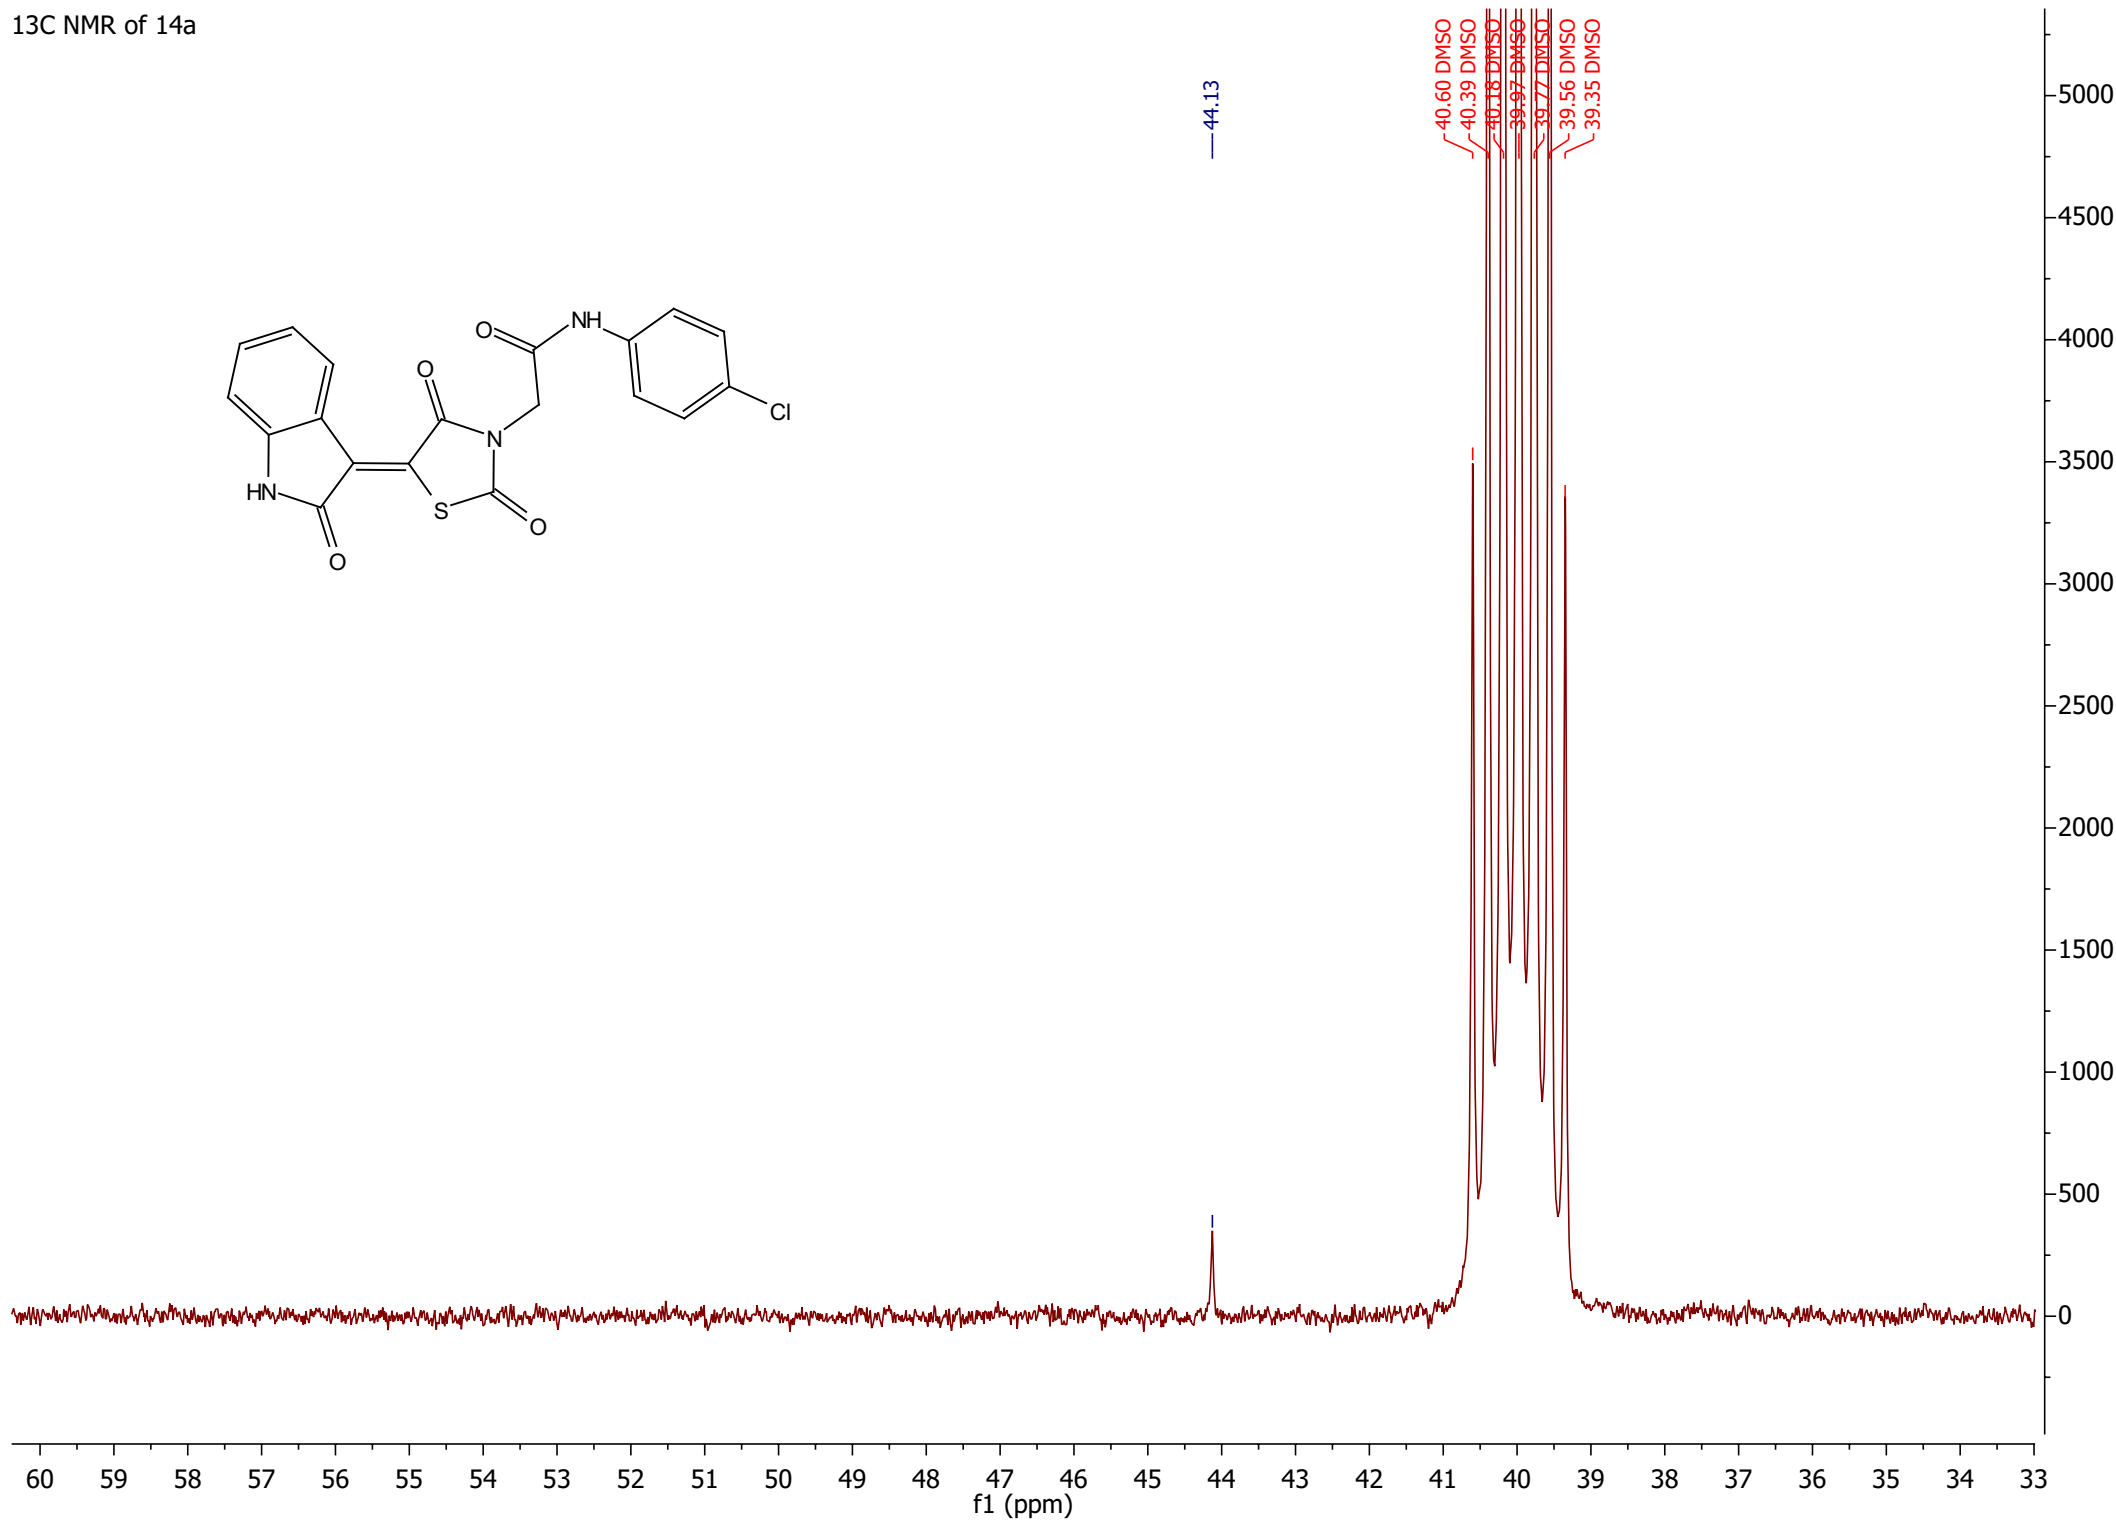

<sup>13</sup>C NMR of 14a

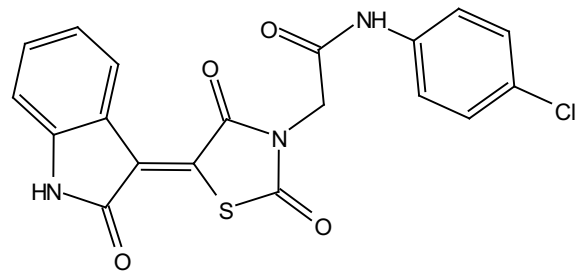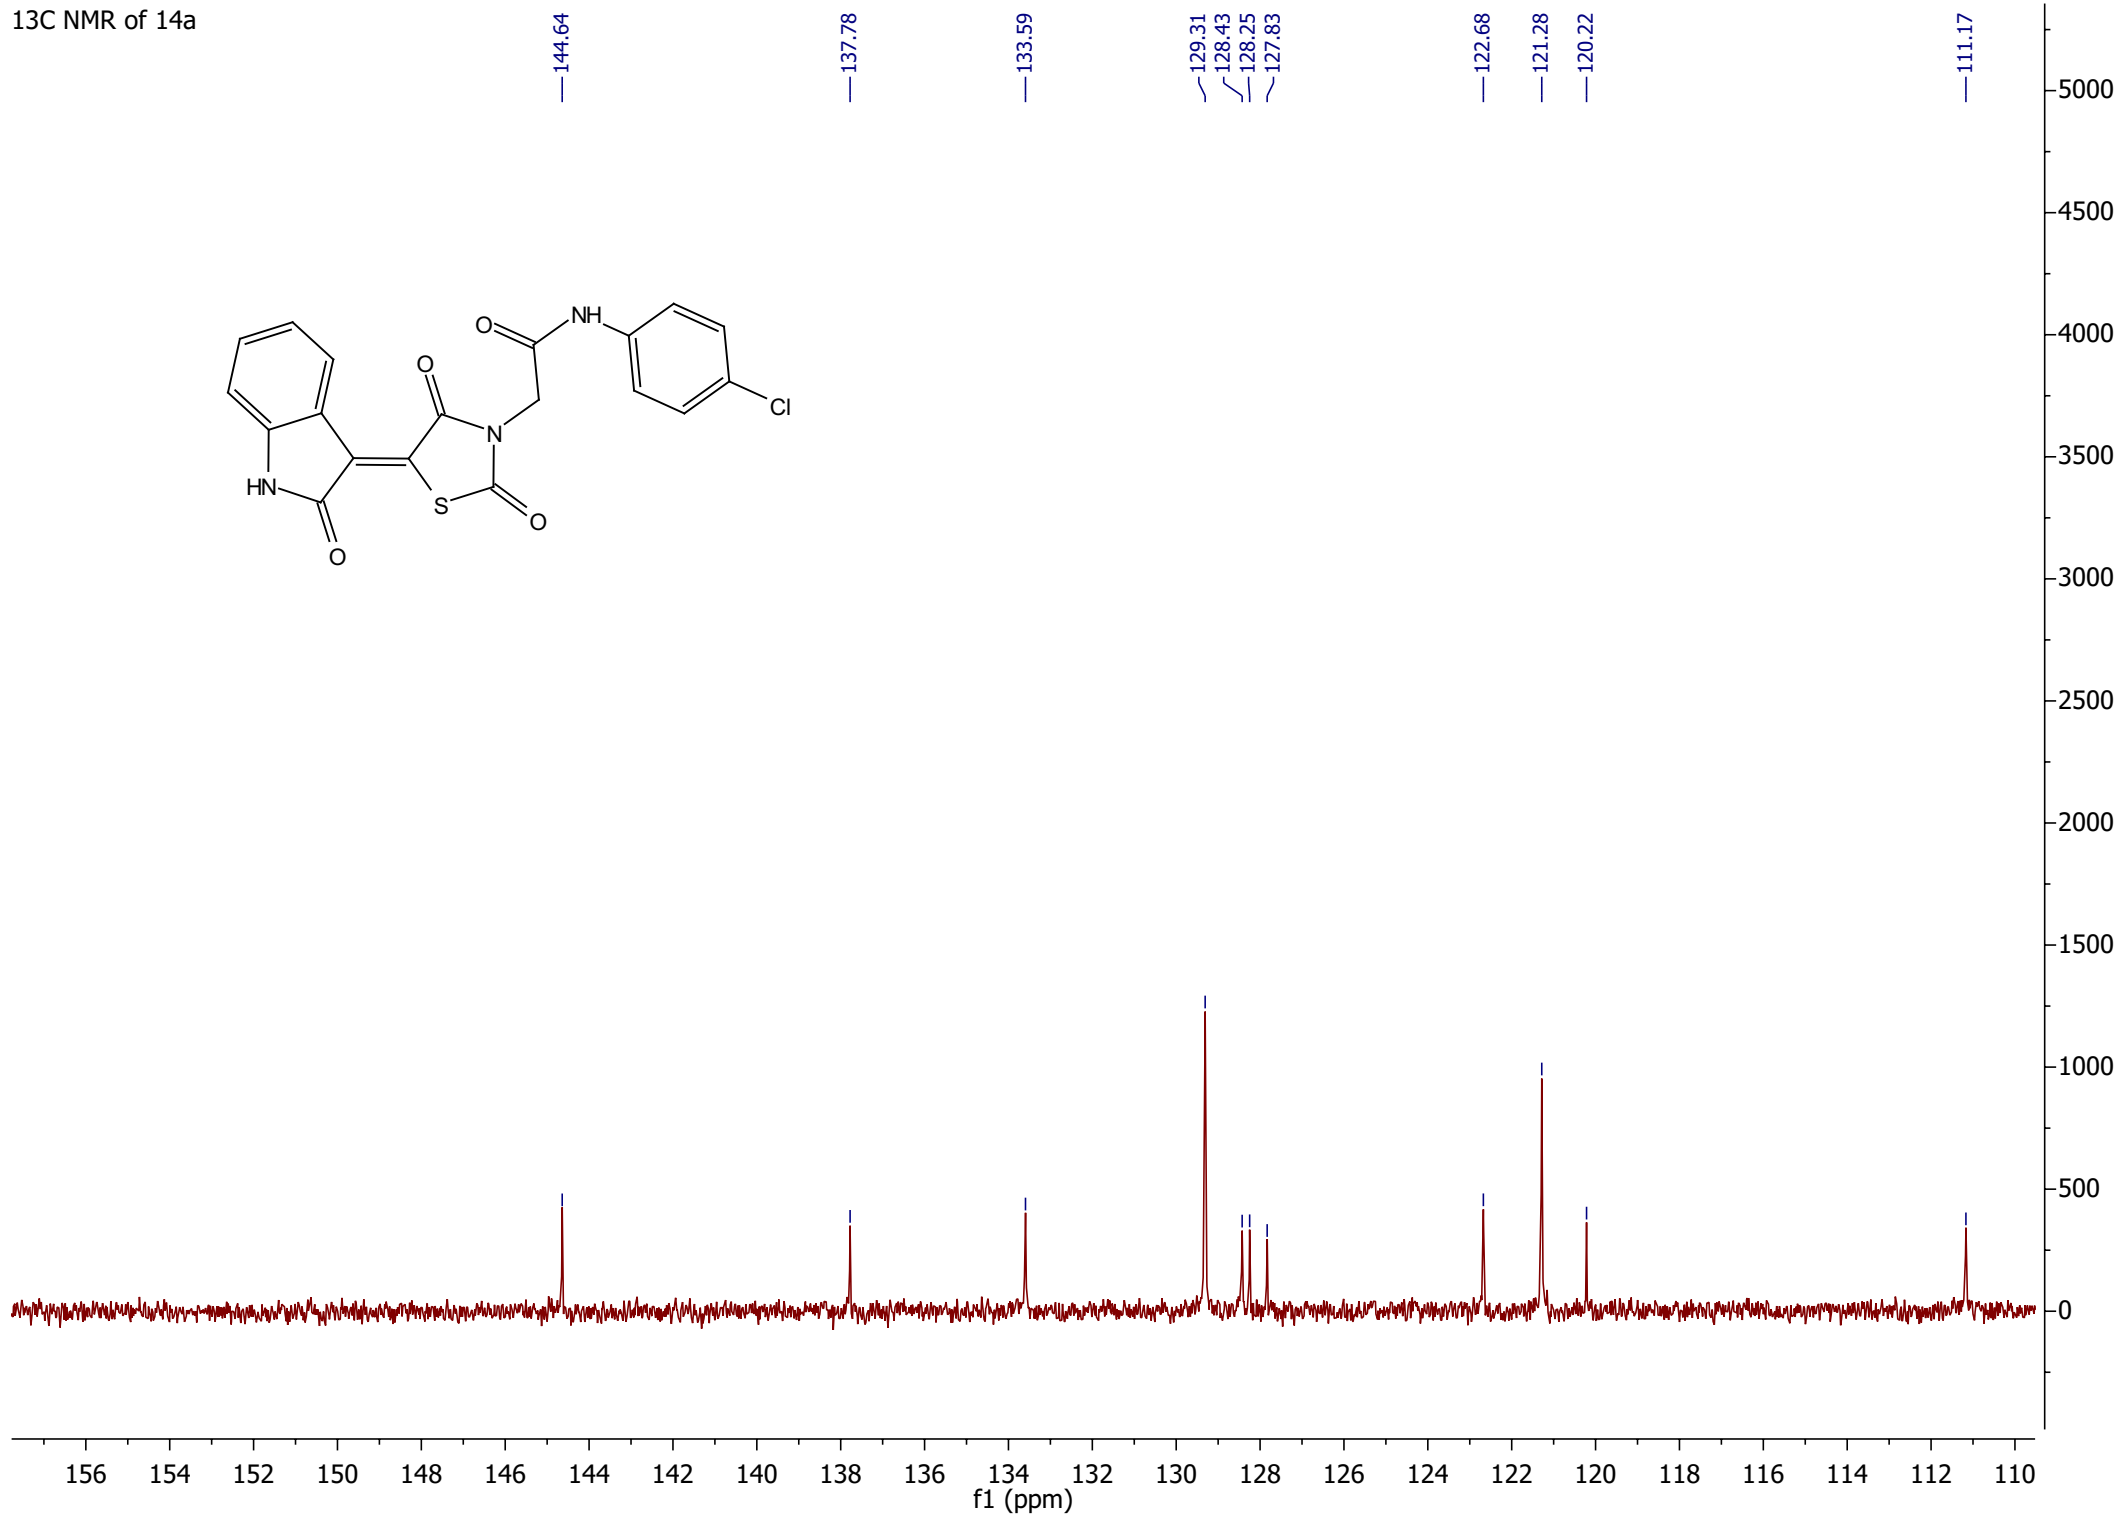

<sup>13</sup>C NMR of 14a

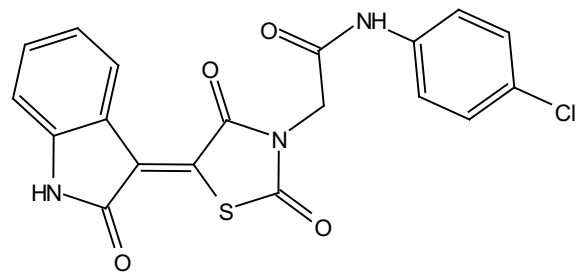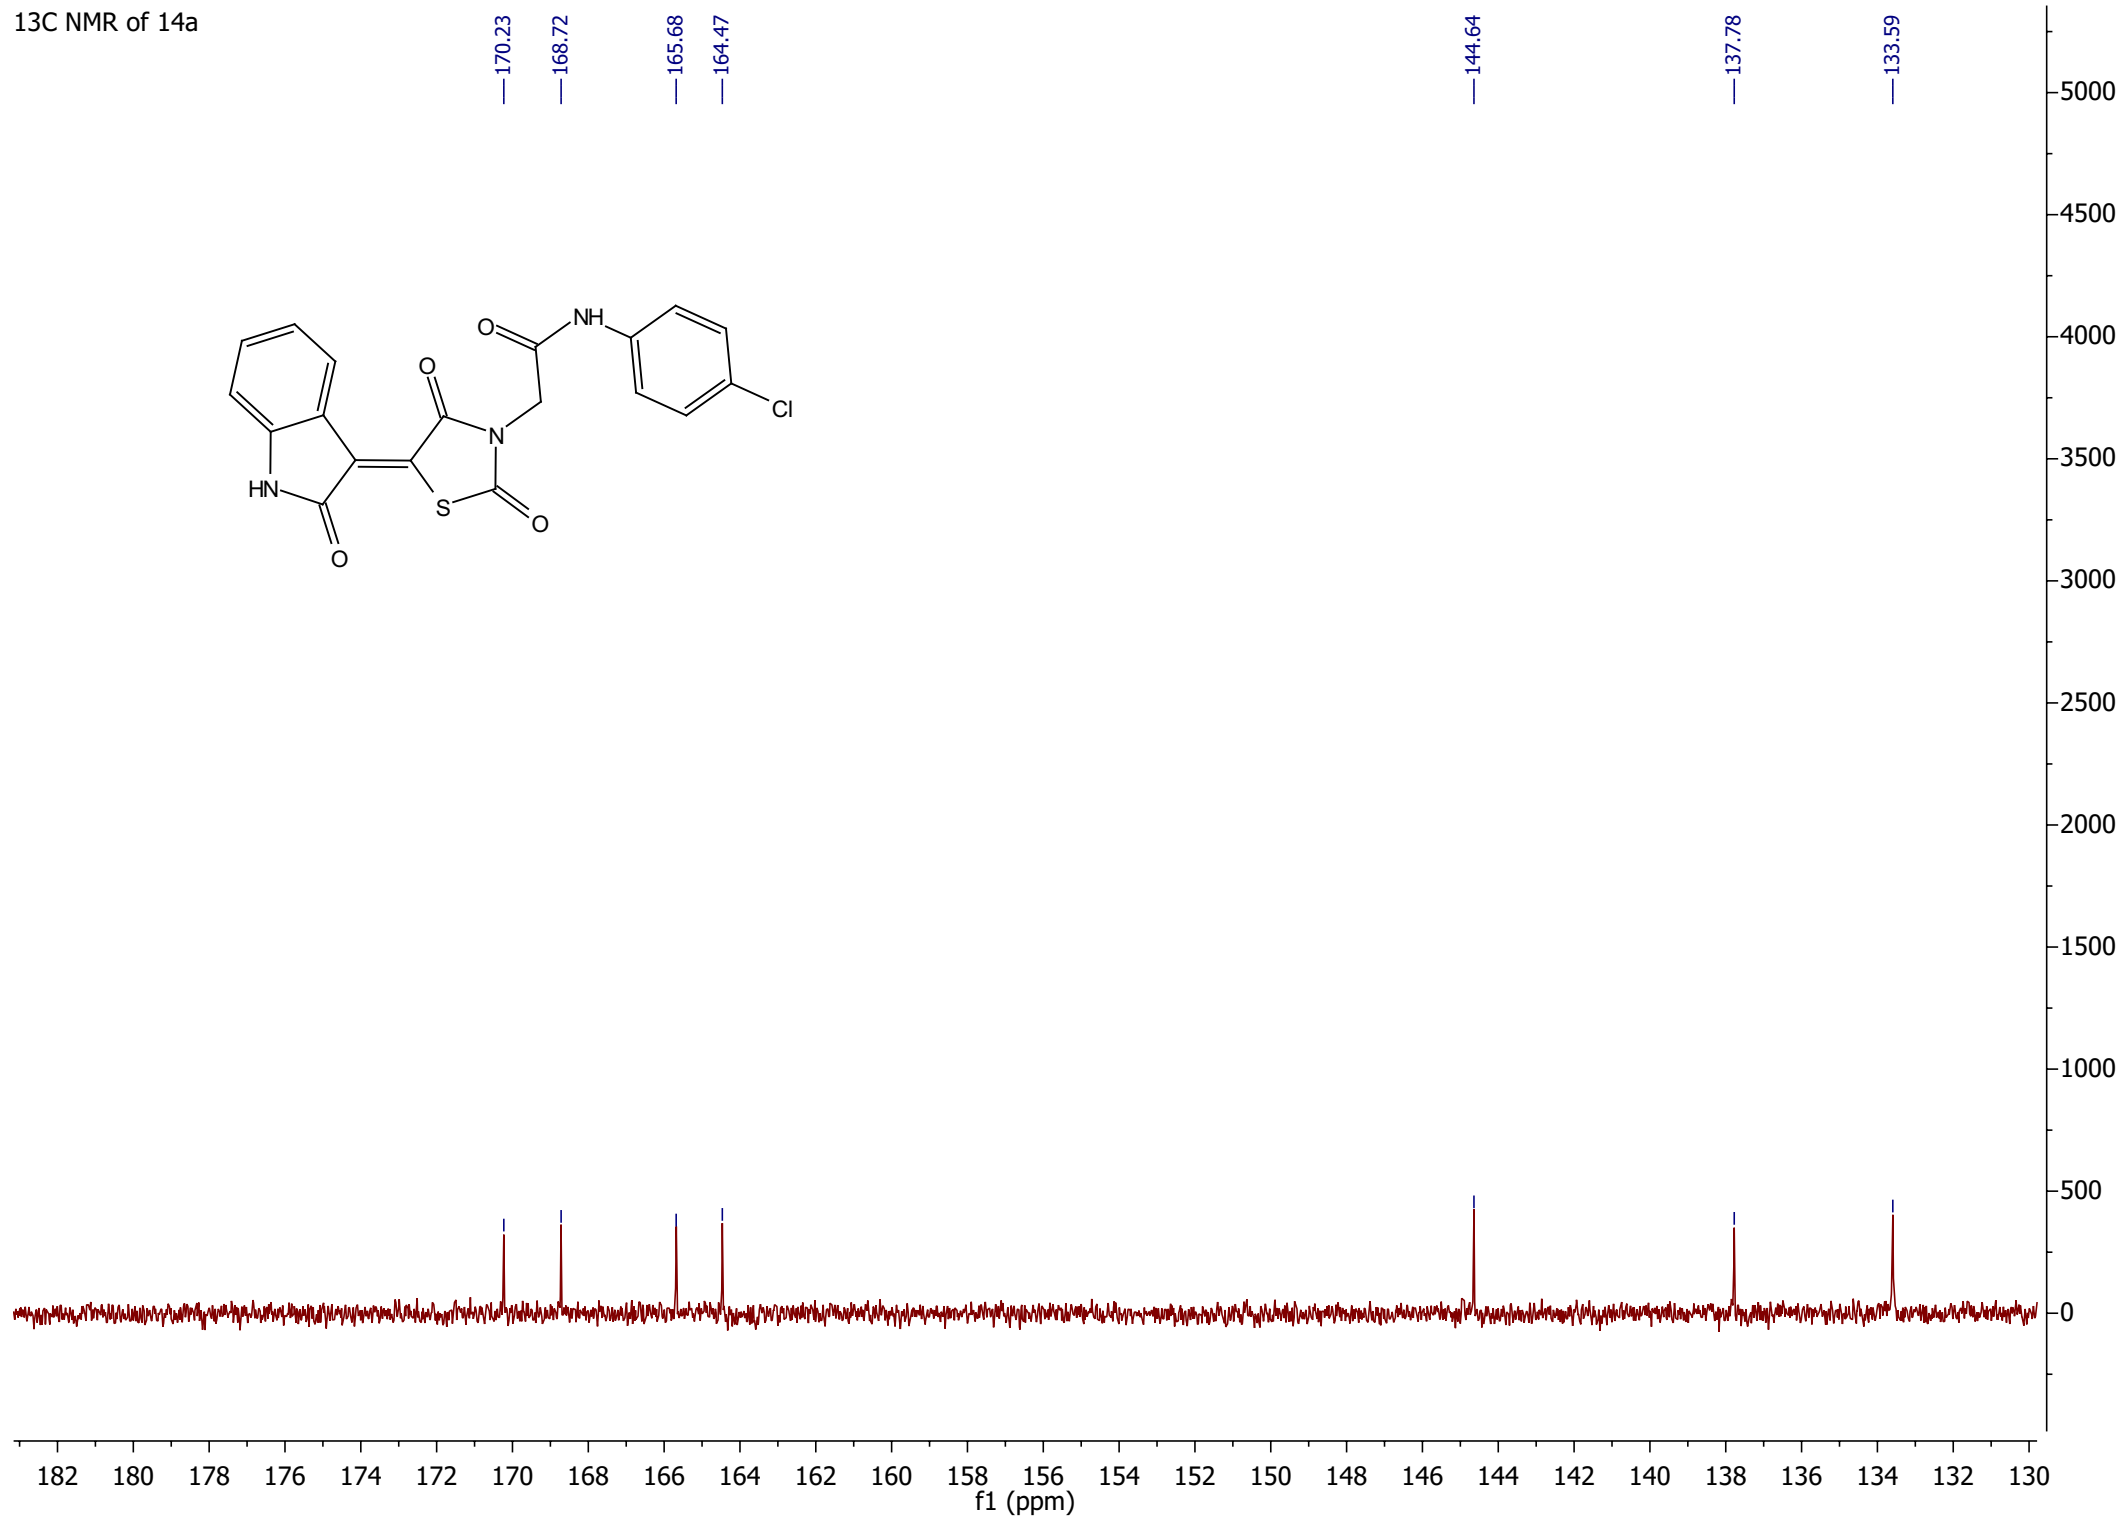



<sup>13</sup>C NMR of 14c

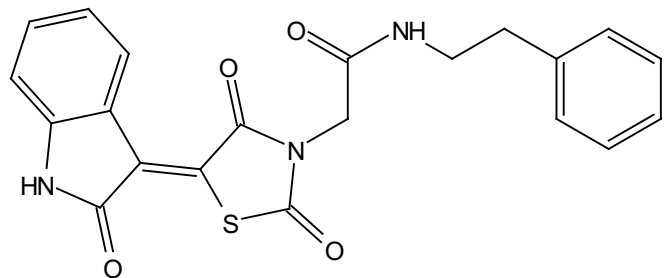

170.30  
168.74  
165.75  
165.61

144.54  
139.31  
133.48  
129.88  
128.82  
128.39  
127.89  
127.66  
127.42  
122.67  
120.24

111.14

43.66  
42.75  
40.61 DMSO  
40.40 DMSO  
40.19 DMSO  
39.99 DMSO  
39.57 DMSO  
39.36 DMSO  
31.18

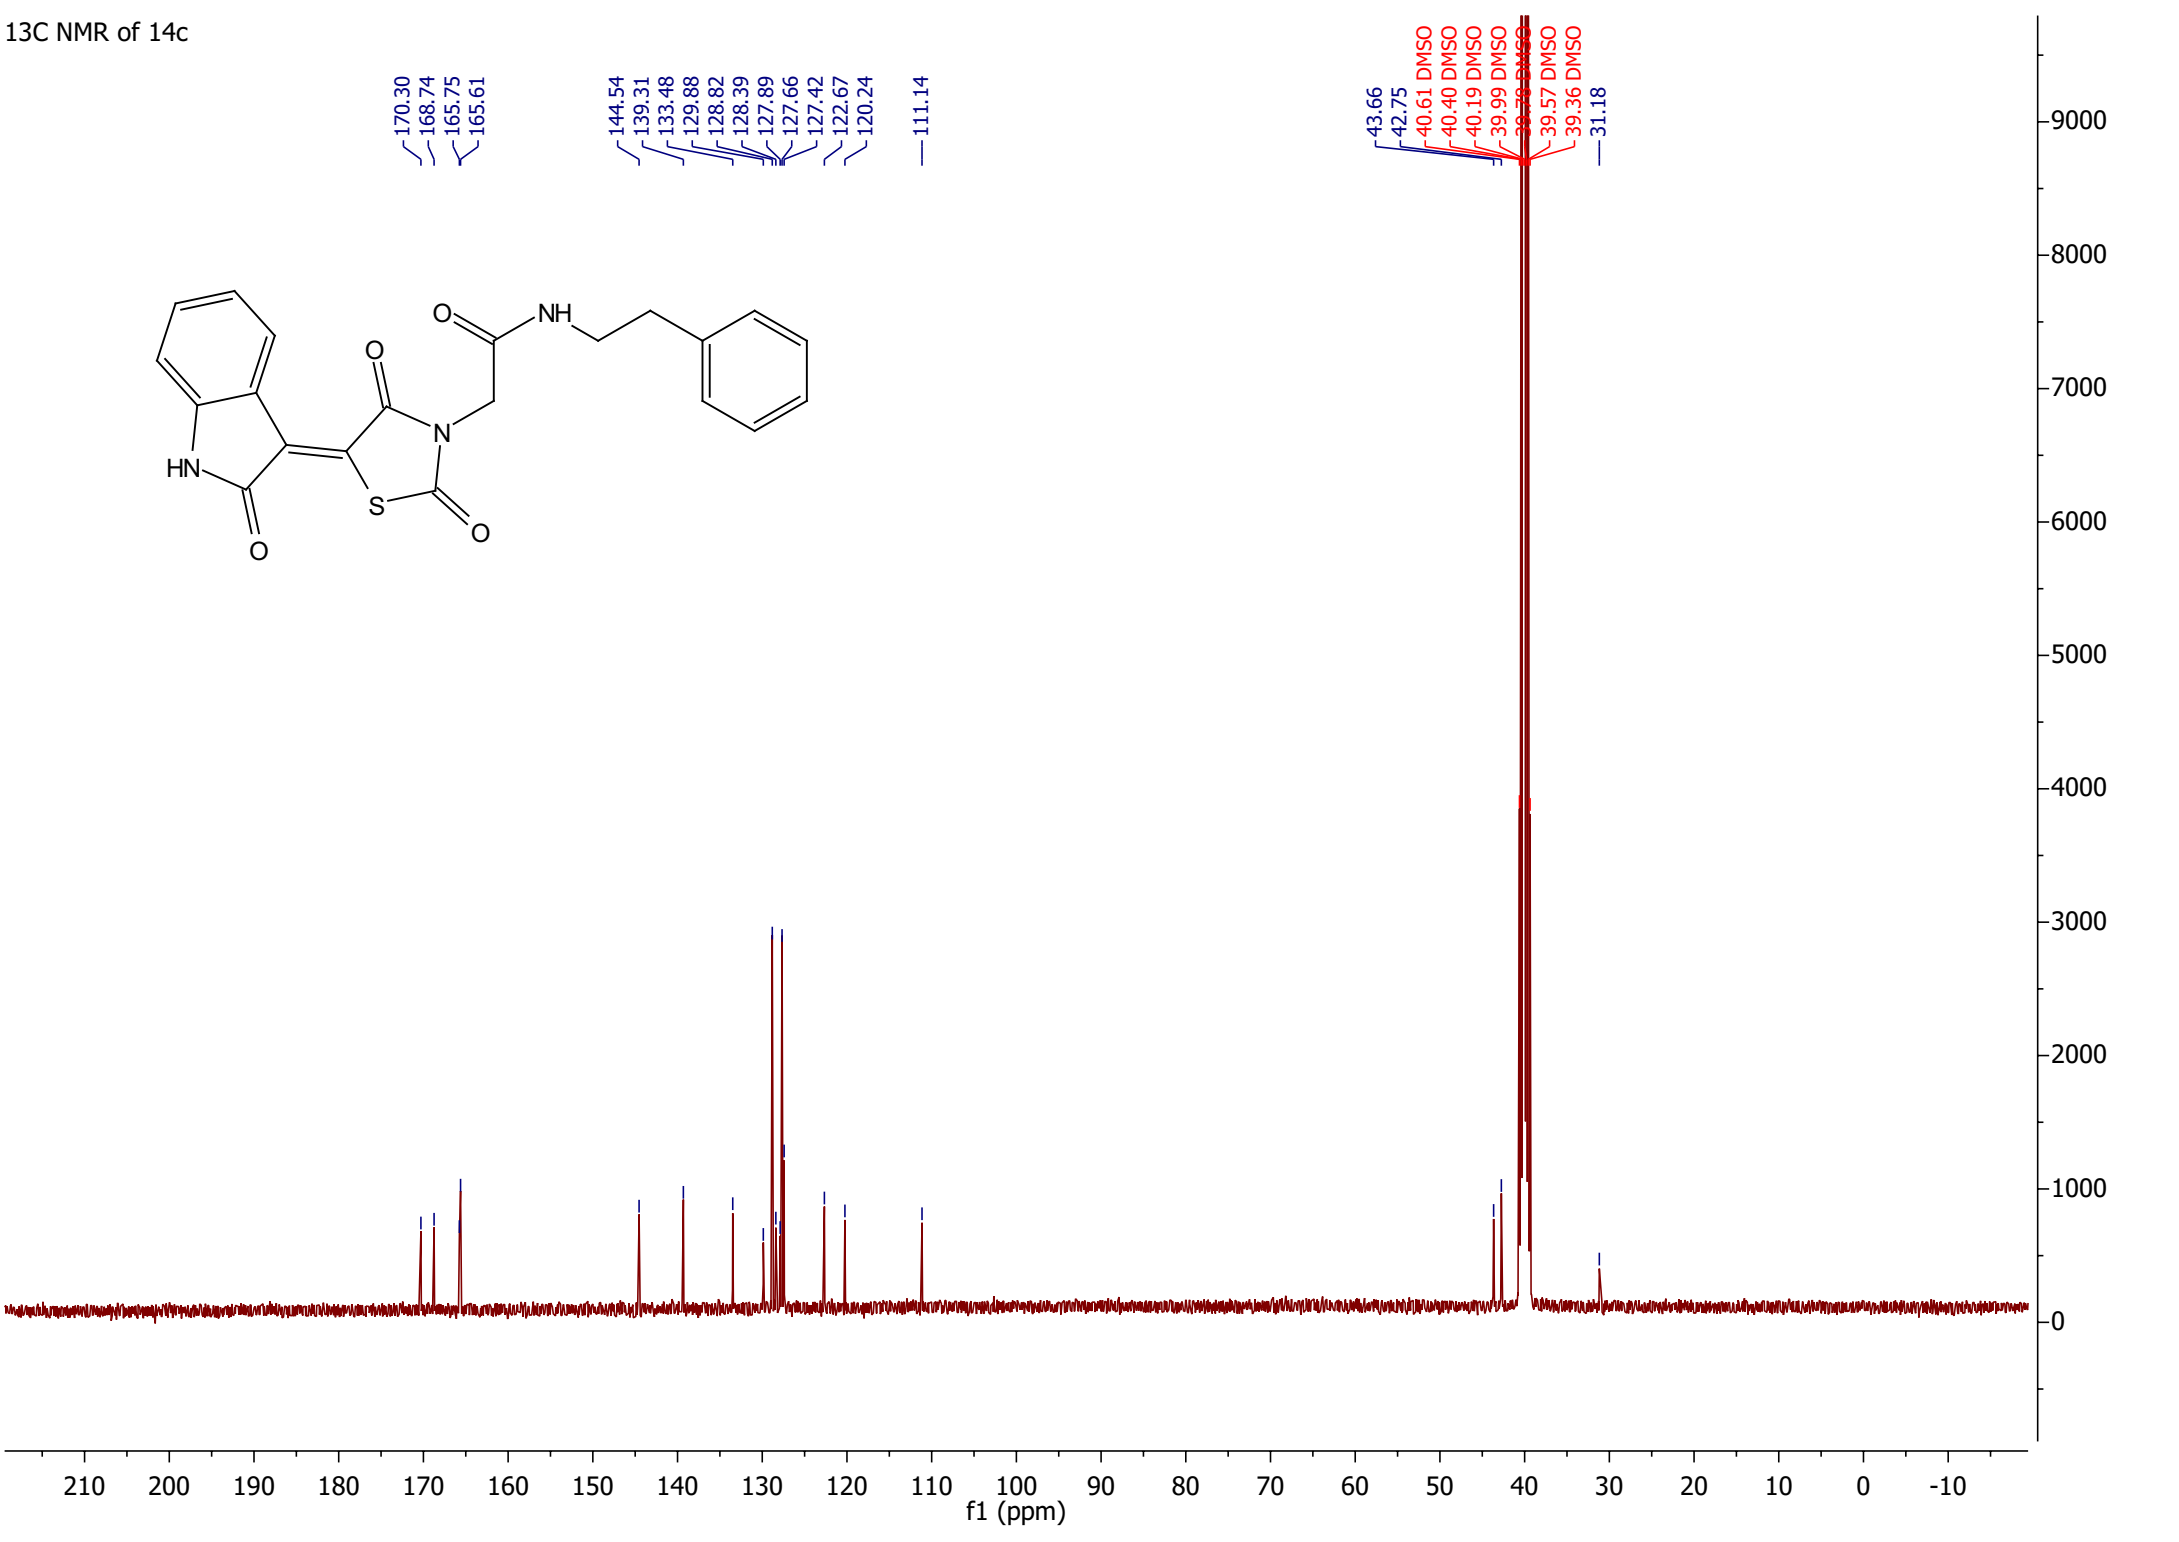

13C NMR of 14c

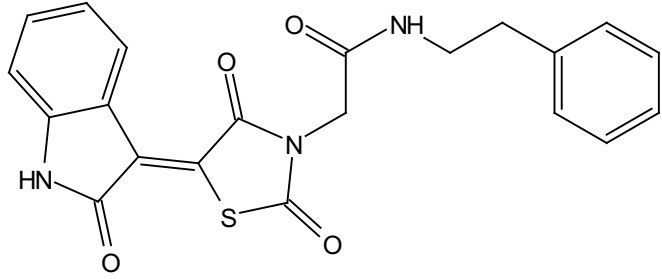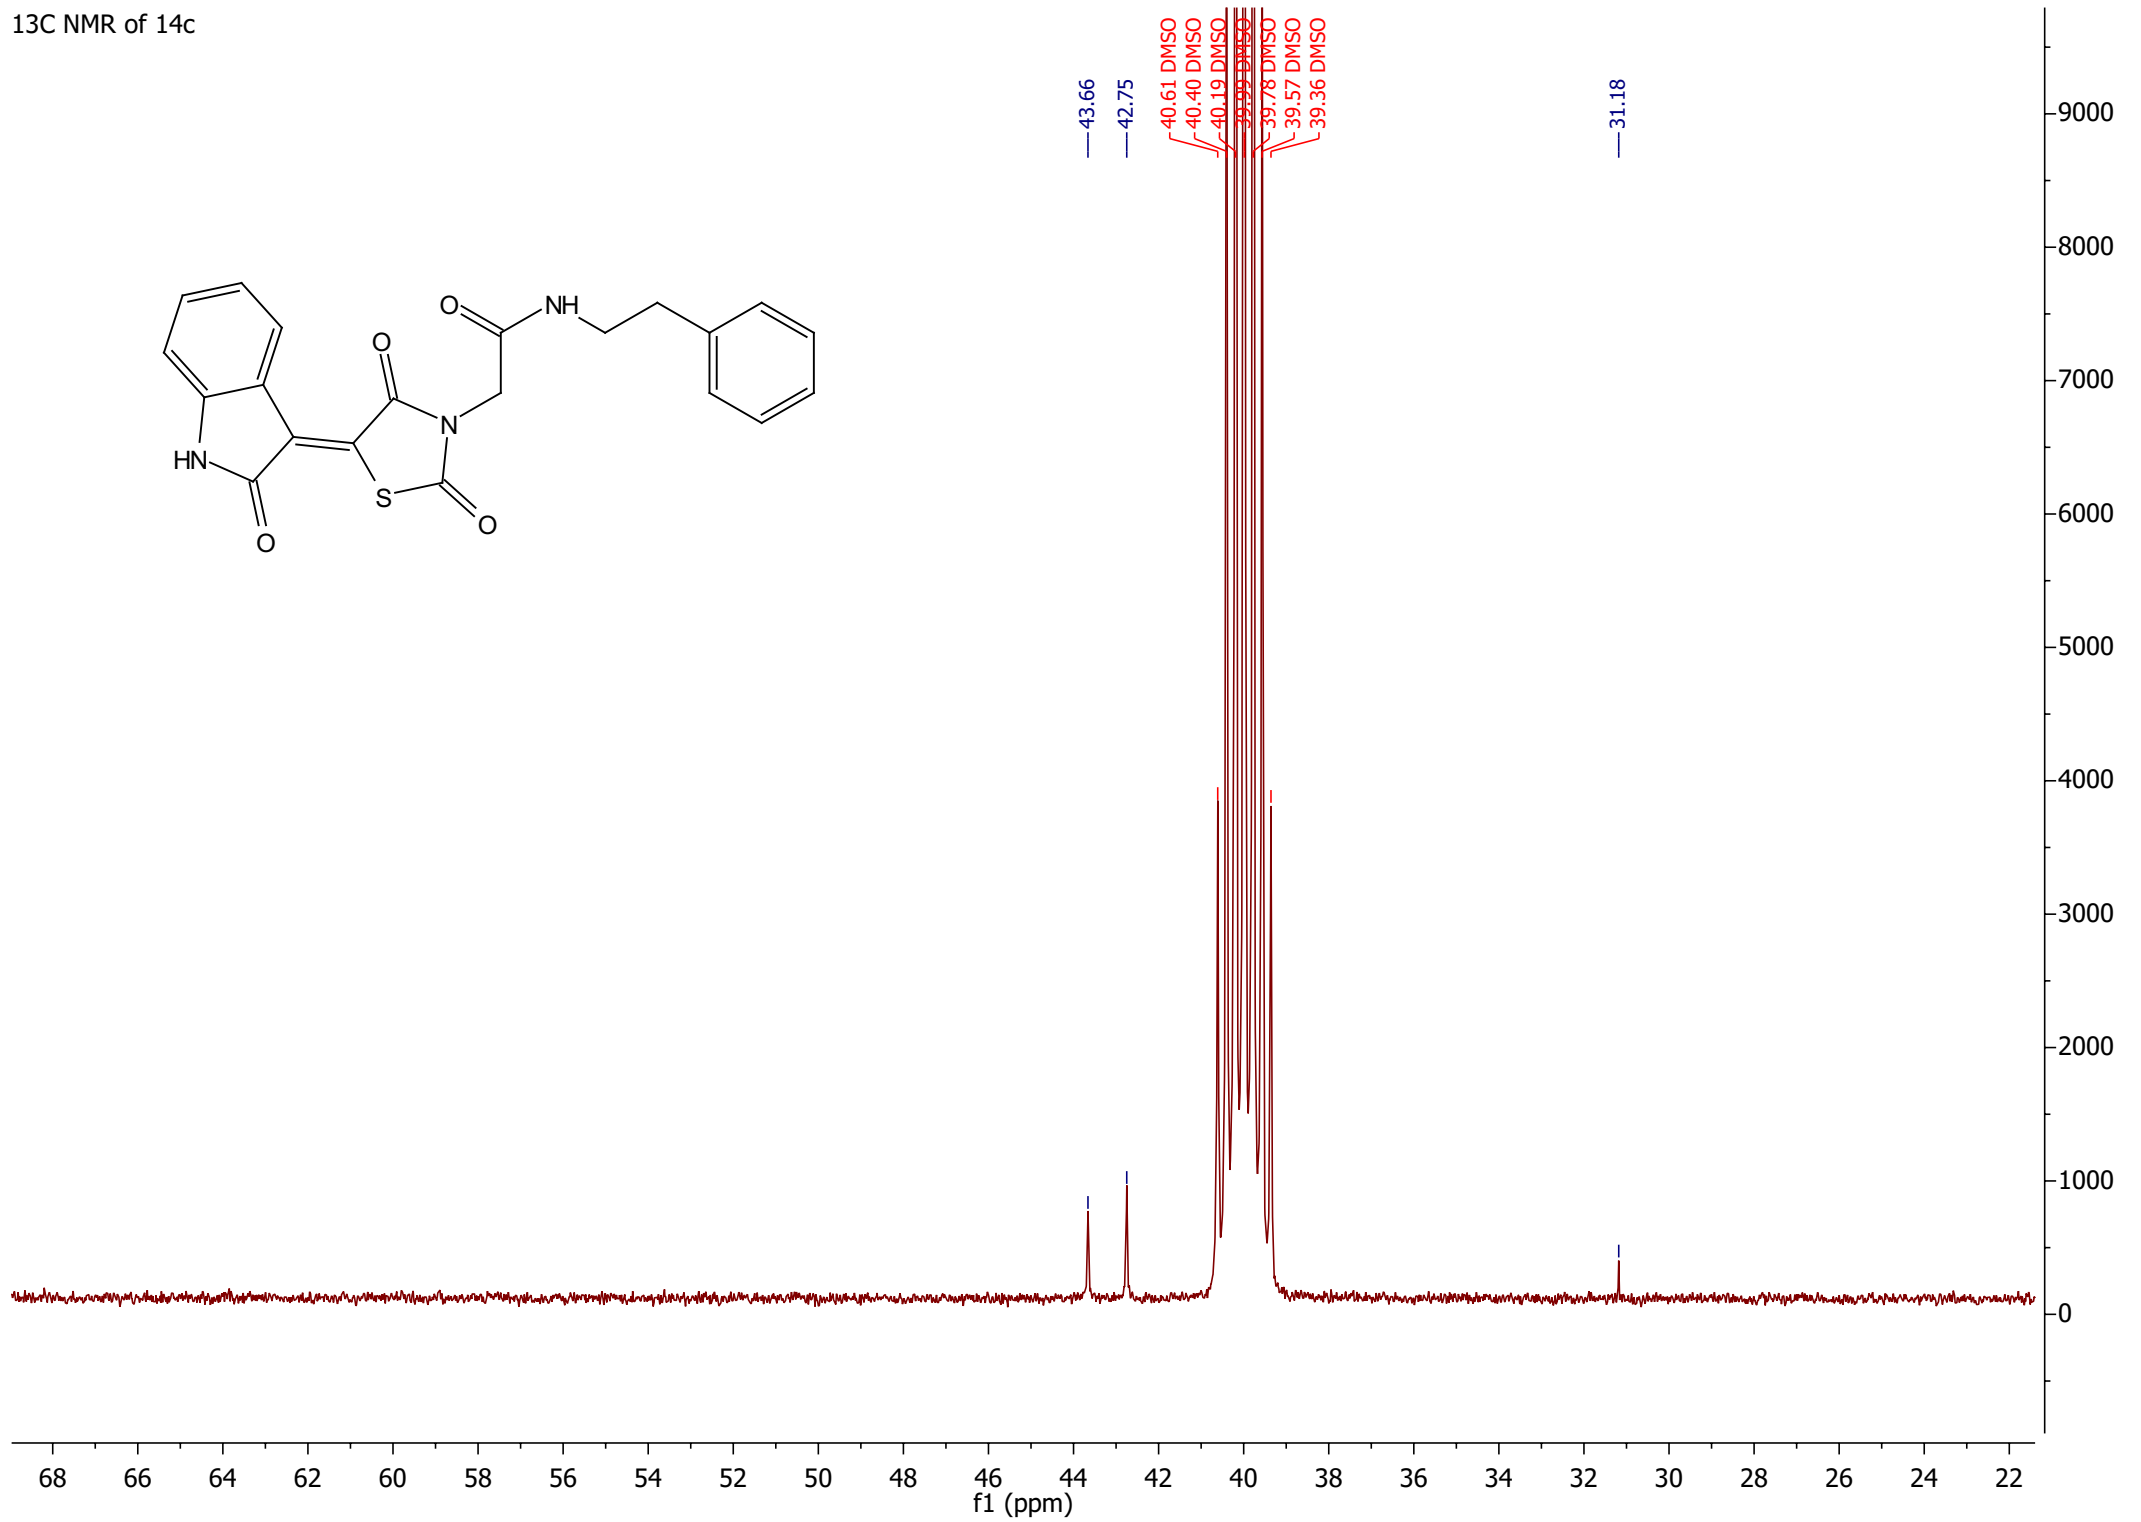

13C NMR of 14b

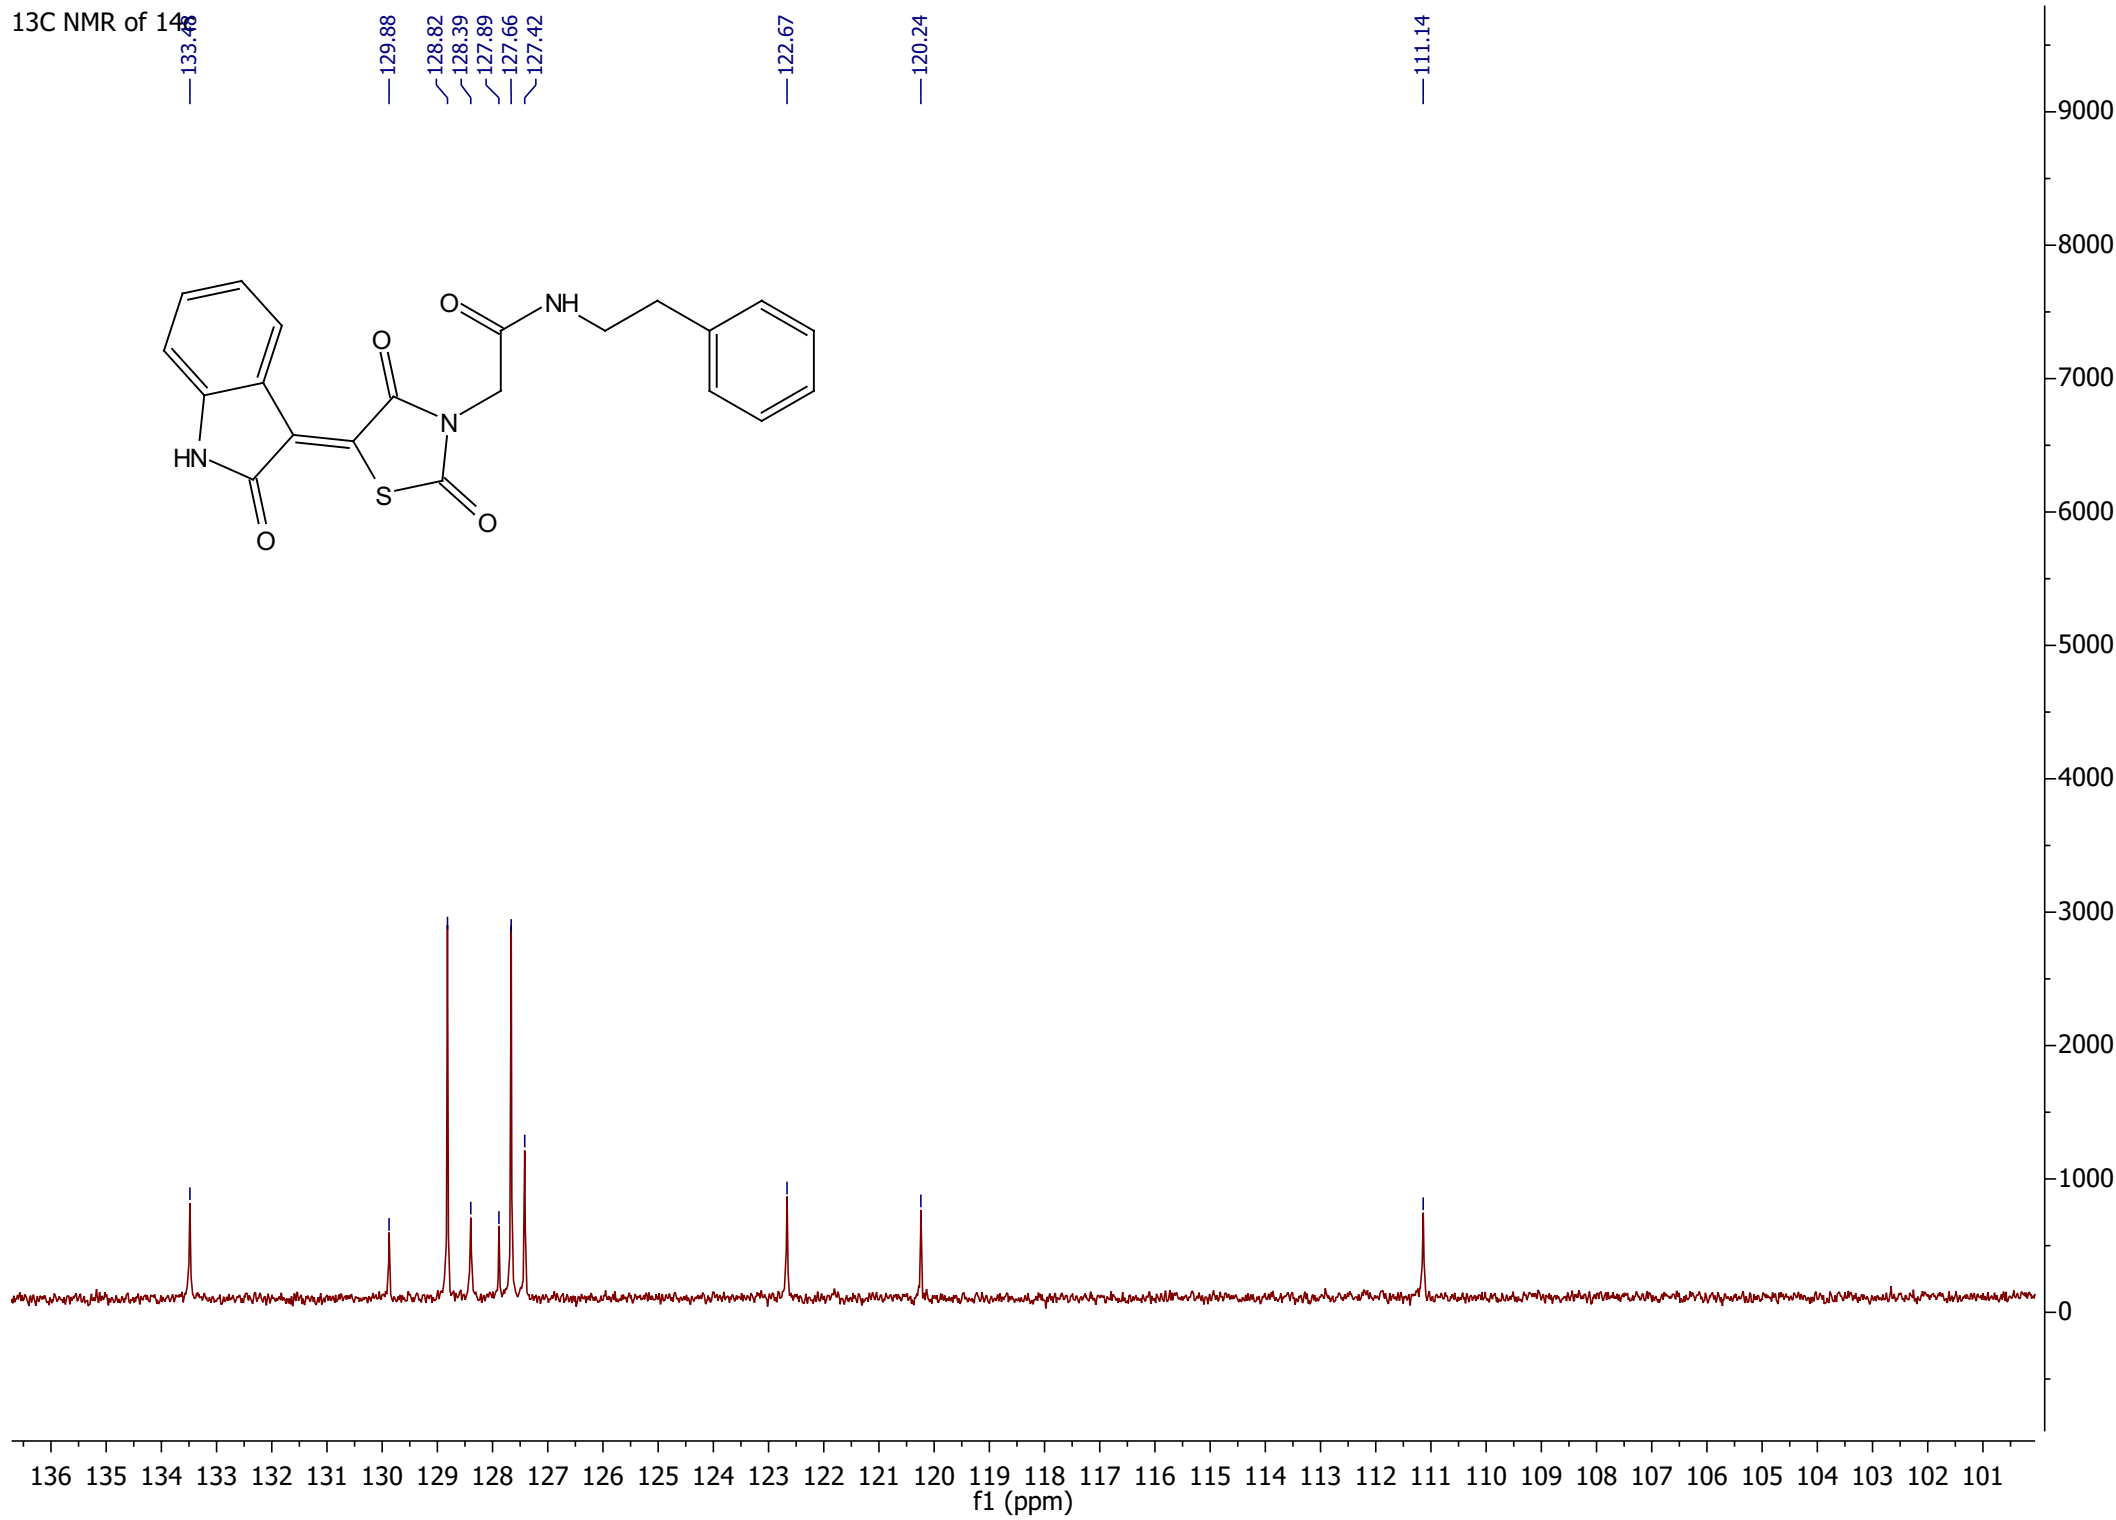

13C NMR of 14c



170.30

168.74

165.75

165.61

144.54

139.31

133.48

129.88

128.82

128.39

127.89

127.66

127.42

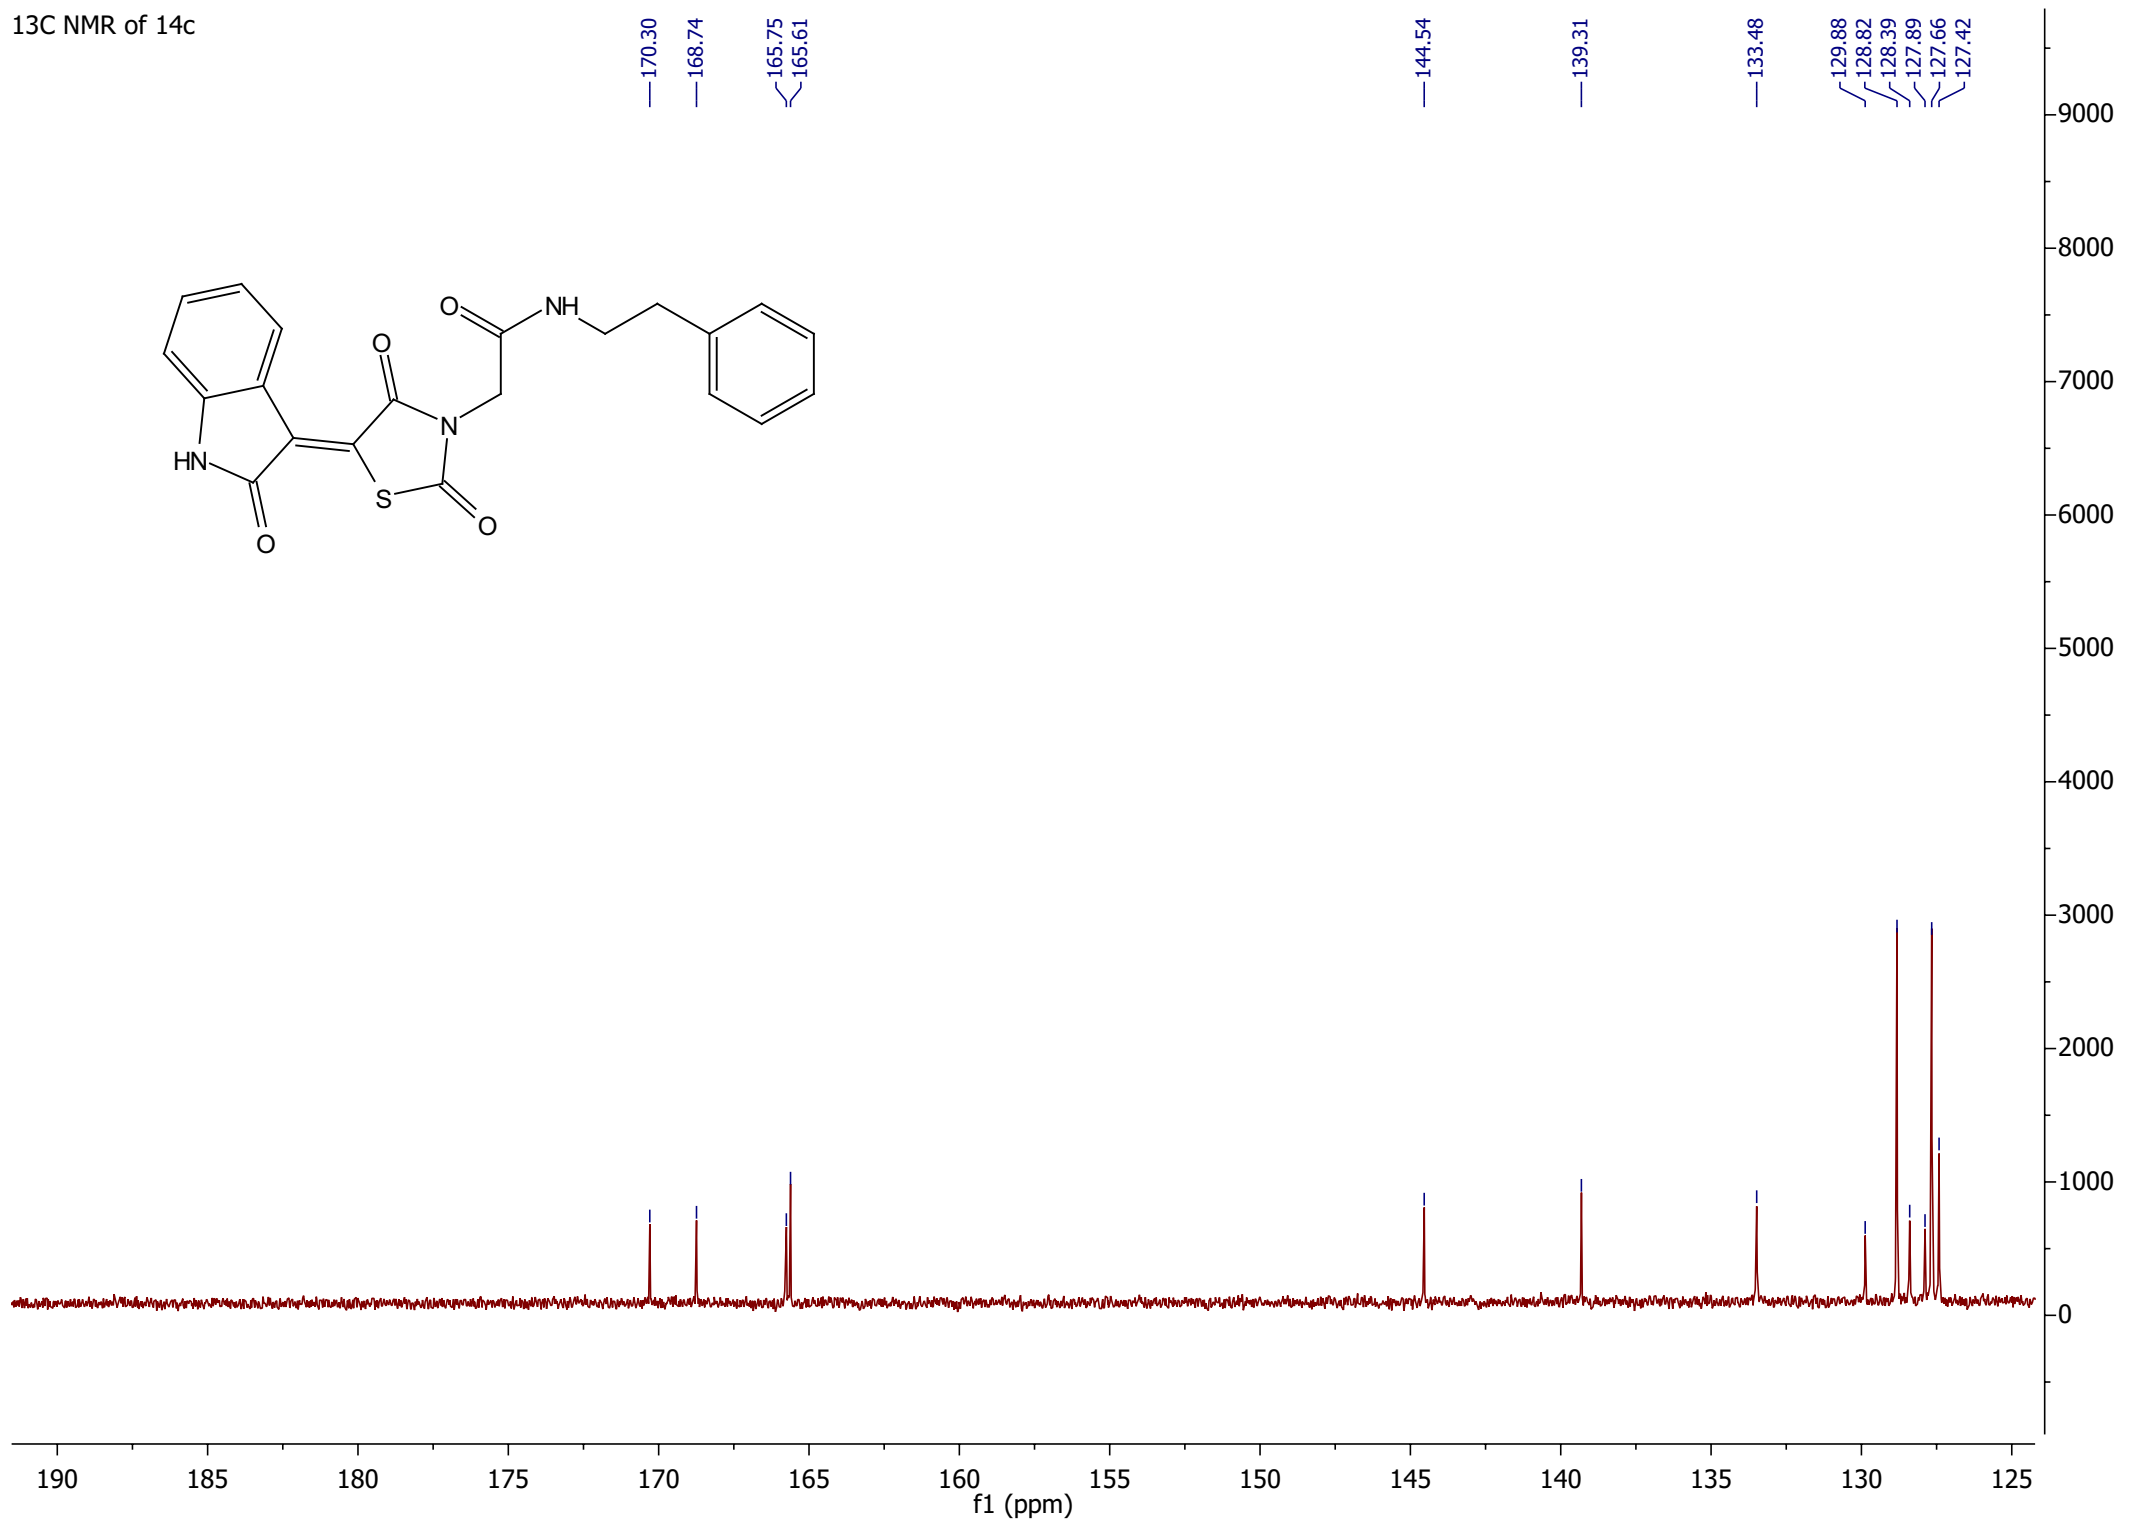

**S.5. Raw data for biological testing**

**RAW DATA OF CYTOTOXICITY**

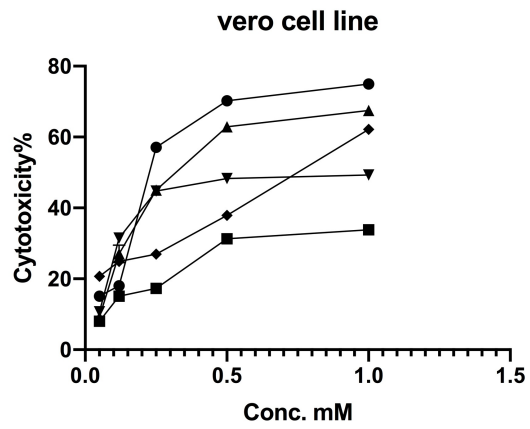

- 10 a
- 10 b
- ▲ 14 a
- ▼ 14 b
- ◆ 14 c

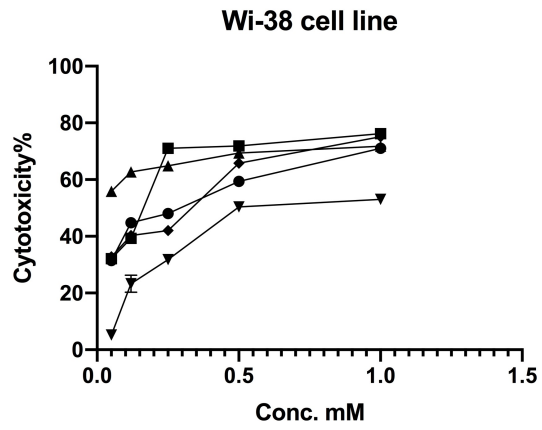

- 10 a
- 10 b
- ▲ 14 a
- ▼ 14 b
- ◆ 14 c

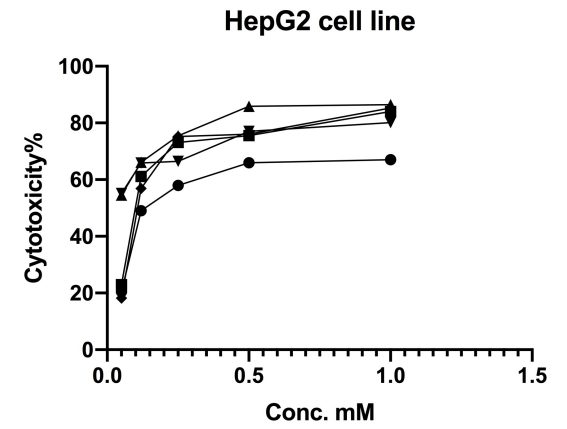

- 10 a
- 10 b
- ▲ 14 a
- ▼ 14 b
- ◆ 14 c

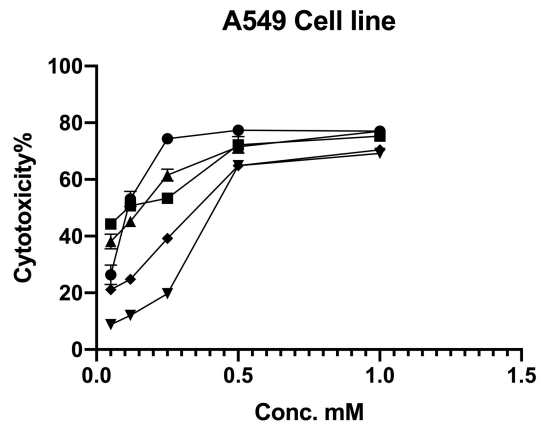

- 10 a
- 10 b
- ▲ 14 a
- ▼ 14 b
- ◆ 14 c

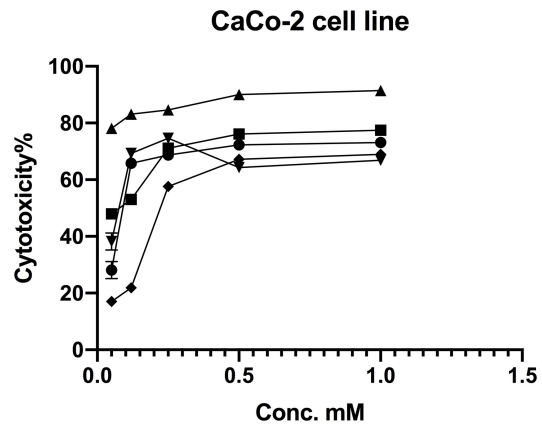

- 10 a
- 10 b
- ▲ 14 a
- ▼ 14 b
- ◆ 14 c

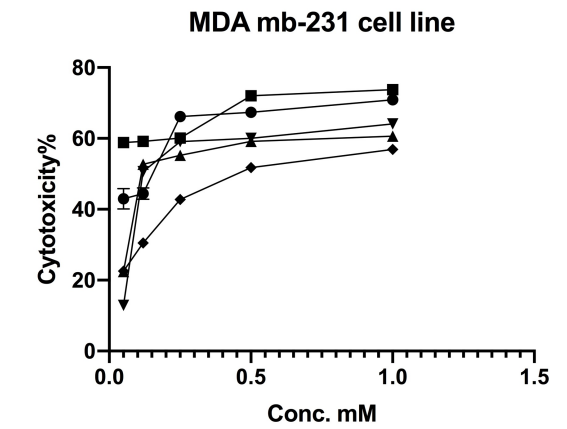

- 10 a
- 10 b
- ▲ 14 a
- ▼ 14 b
- ◆ 14 c

# **RAW DATA OF VEGFR-2 ASSAY**

## VEGFR-2 assay of compound 14a

| Best-fit values |         |
|-----------------|---------|
| LogIC50         | 1.961   |
| HillSlope       | -0.4675 |
| IC50            | 91.51   |

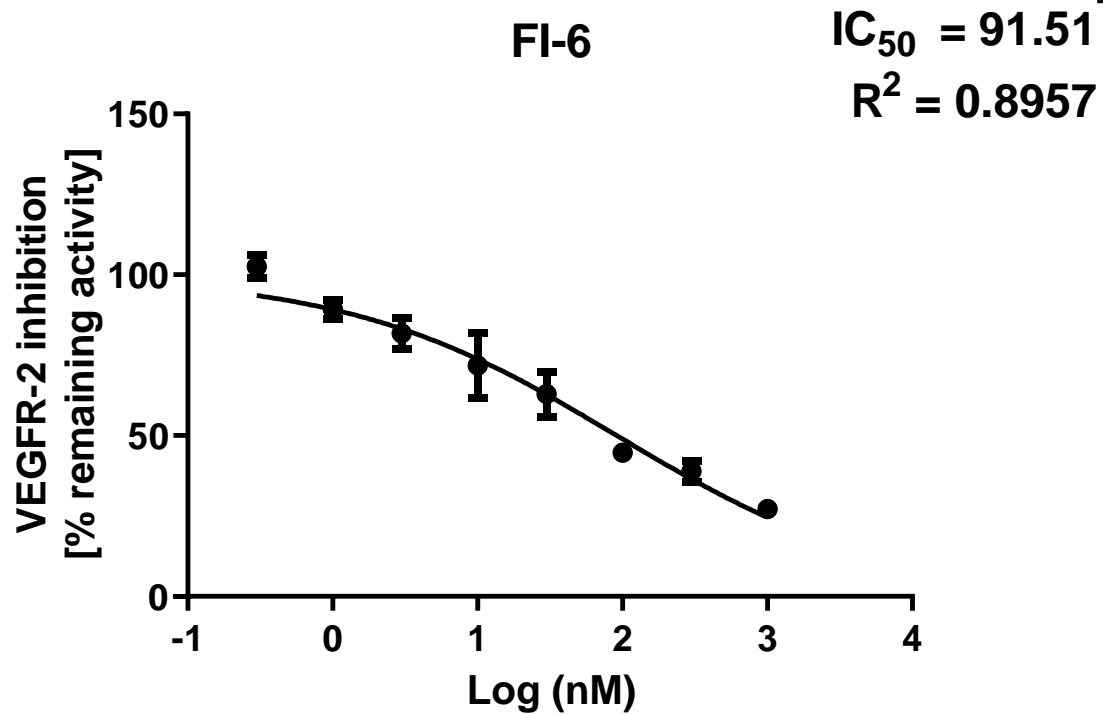



## VEGFR-2 assay of compound 14b

| Best-fit values |         |
|-----------------|---------|
| LogIC50         | 1.934   |
| HillSlope       | -0.5620 |
| IC50            | 85.85   |

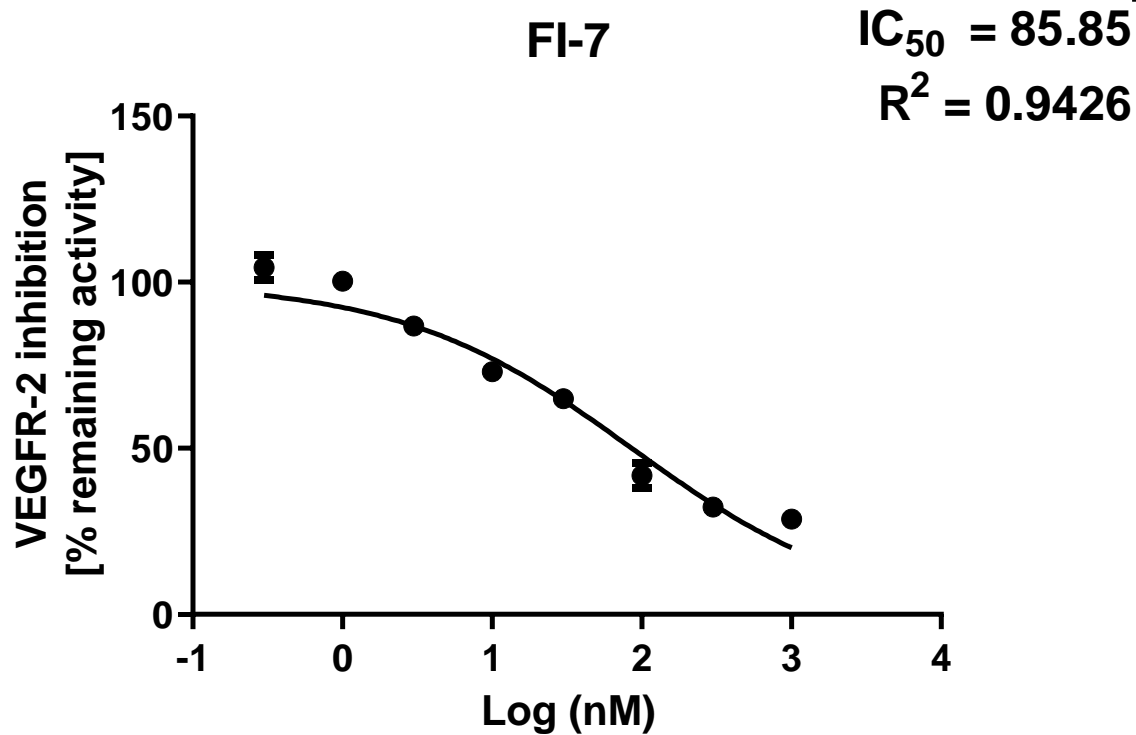

# VEGFR-2 assay of compound 14c

| Best-fit values |         |
|-----------------|---------|
| LogIC50         | 1.911   |
| HillSlope       | -0.4220 |
| IC50            | 81.46   |

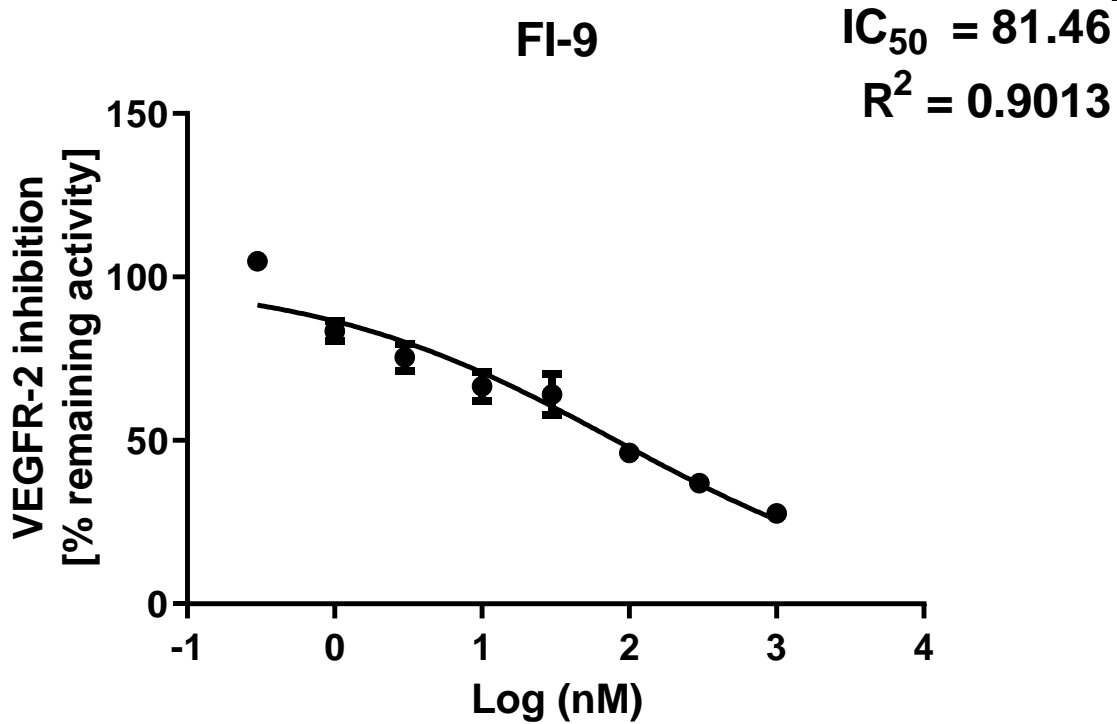

## VEGFR-2 assay of compound 10a

| Best-fit values |         |
|-----------------|---------|
| LogIC50         | 1.814   |
| HillSlope       | -0.4587 |
| IC50            | 65.16   |

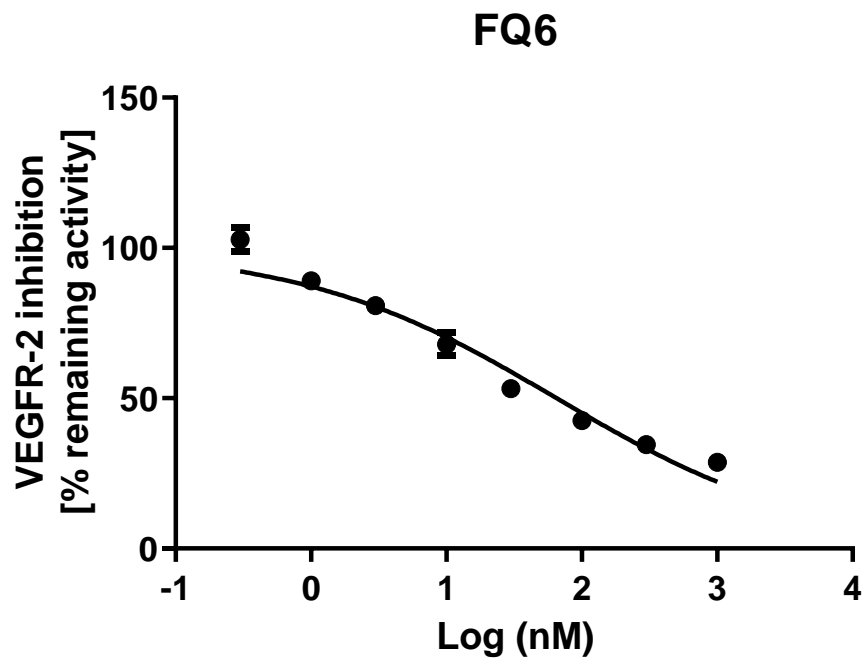

# VEGFR-2 assay of compound 10b

| Best-fit values |         |
|-----------------|---------|
| LogIC50         | 2.216   |
| HillSlope       | -0.3514 |
| IC50            | 164.5   |

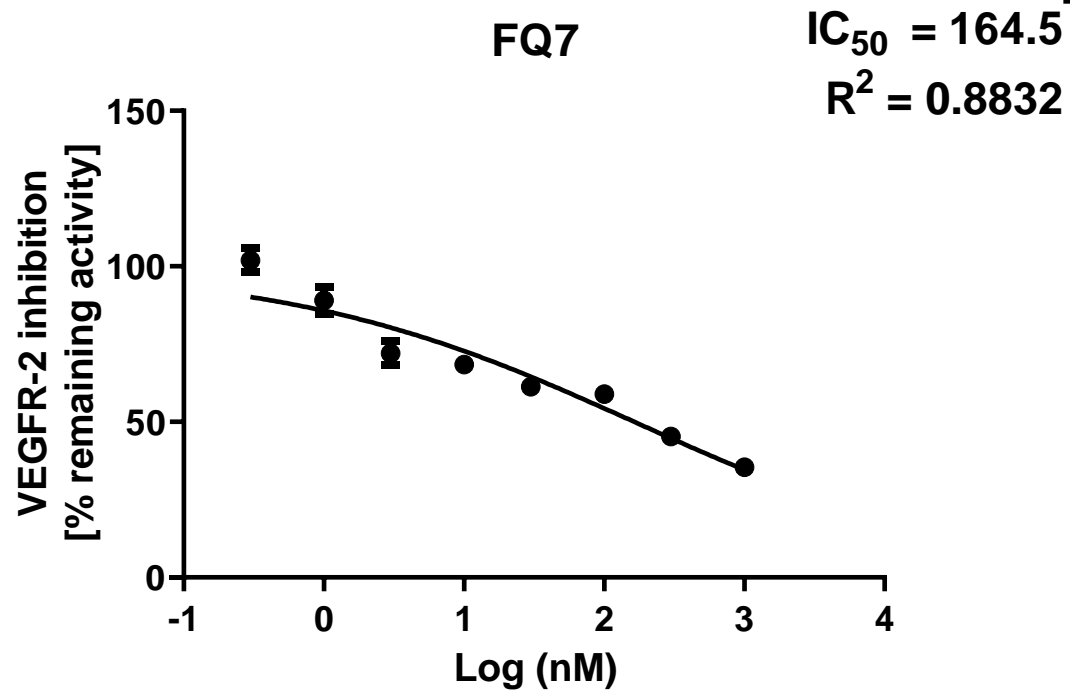

# VEGFR-2 assay of sorafenib

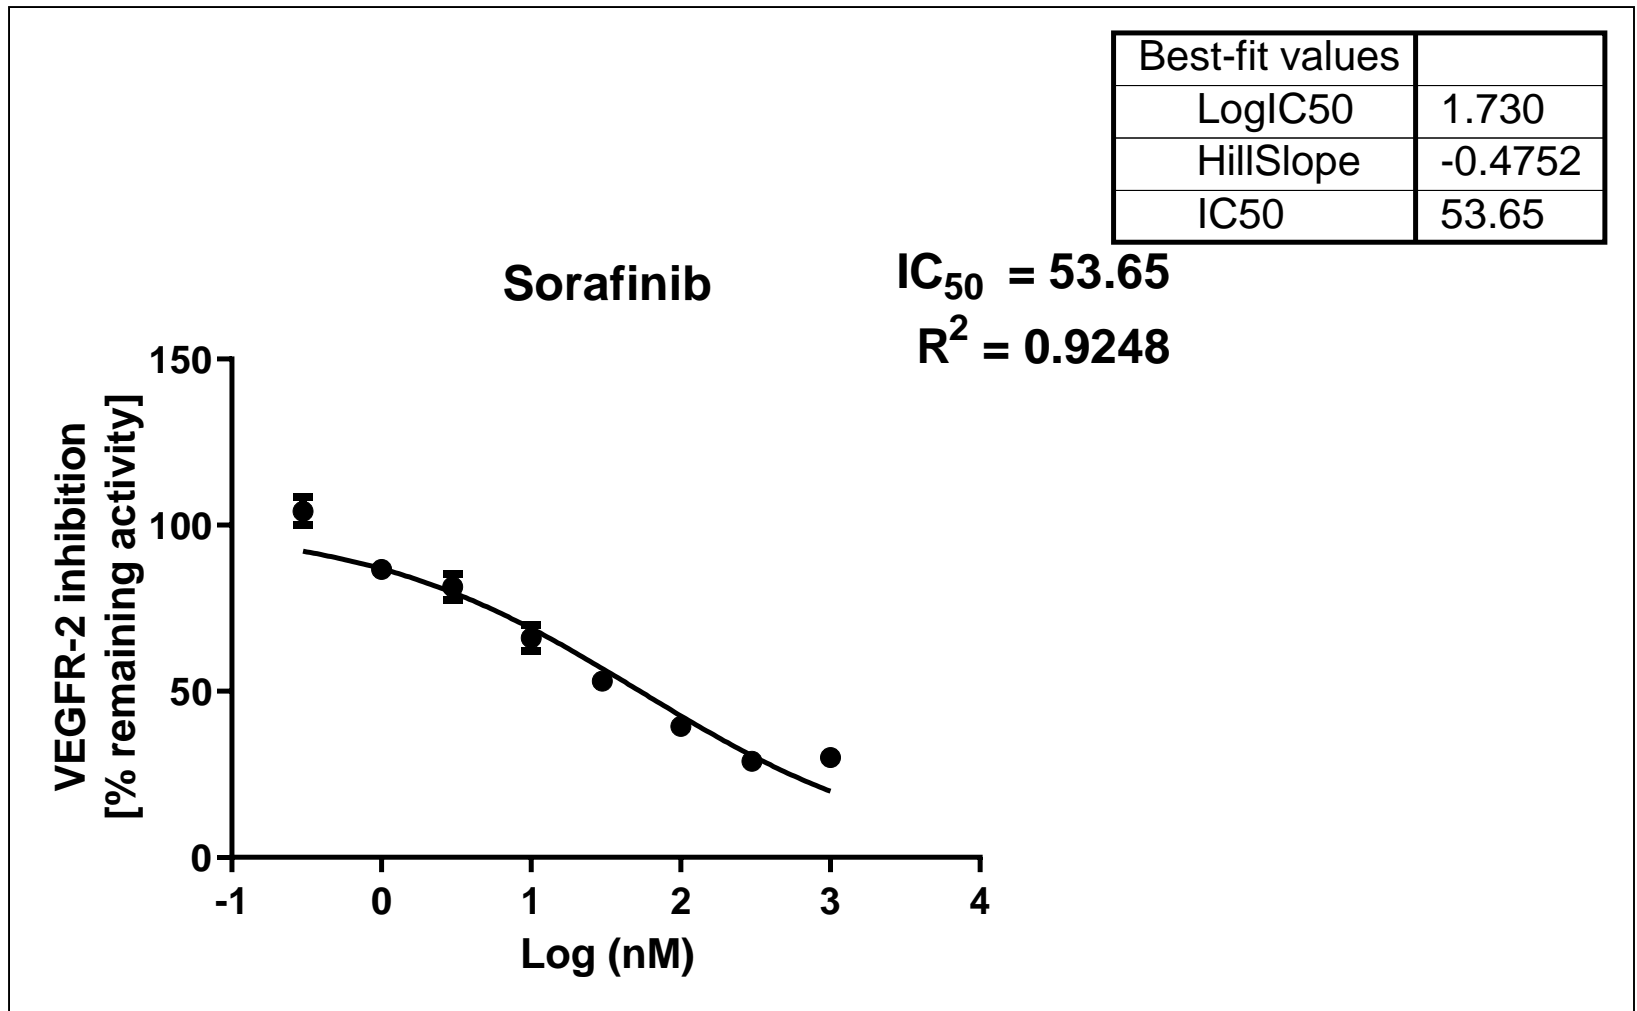

# S.6. In silico cytotoxicity report

10a

TOPKAT\_Ames\_Mutagenicity

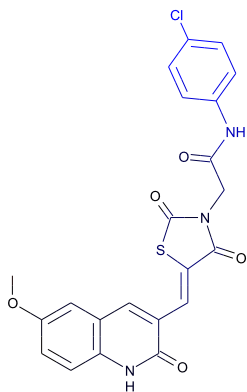

C<sub>22</sub>H<sub>16</sub>ClN<sub>3</sub>O<sub>5</sub>S

Molecular Weight: 469.89753

ALogP: 2.815

Rotatable Bonds: 5

Acceptors: 6

Donors: 2

## Model Prediction

Prediction: Non-Mutagen

Probability: 0.333

Enrichment: 0.596

Bayesian Score: -11.1

Mahalanobis Distance: 12.2

Mahalanobis Distance p-value: 0.000264

Prediction: Positive if the Bayesian score is above the estimated best cutoff value from minimizing the false positive and false negative rate.

Probability: The estimated probability that the sample is in the positive category. This assumes that the Bayesian score follows a normal distribution and is different from the prediction using a cutoff.

Enrichment: An estimate of enrichment, that is, the increased likelihood (versus random) of this sample being in the category.

Bayesian Score: The standard Laplacian-modified Bayesian score.

Mahalanobis Distance: The Mahalanobis distance (MD) is the distance to the center of the training data. The larger the MD, the less trustworthy the prediction.

Mahalanobis Distance p-value: The p-value gives the fraction of training data with an MD greater than or equal to the one for the given sample, assuming normally distributed data. The smaller the p-value, the less trustworthy the prediction. For highly non-normal X properties (e.g., fingerprints), the MD p-value is wildly inaccurate.

## Structural Similar Compounds

| Name               | Delavirdine                                                                                                          | 55256-55-8                                       | Ochratoxin A |
|--------------------|----------------------------------------------------------------------------------------------------------------------|--------------------------------------------------|--------------|
| Structure          |                                                                                                                      |                                                  |              |
| Actual Endpoint    | Non-Mutagen                                                                                                          | Mutagen                                          | Non-Mutagen  |
| Predicted Endpoint | Non-Mutagen                                                                                                          | Mutagen                                          | Non-Mutagen  |
| Distance           | 0.605                                                                                                                | 0.608                                            | 0.614        |
| Reference          | Contrera, J.F., Matthews, E.J., Kruhlak, N.L., and Benz, R.D., Regulatory Toxicology and Pharmacology 2005, 313-323. | Kazius et. al., J. Med. Chem. (2005) 48, 312-320 | EMIC         |

## Model Applicability

Unknown features are fingerprint features in the query molecule, but not found or appearing too infrequently in the training set.

1. All properties and OPS components are within expected ranges.

## Feature Contribution

### Top features for positive contribution

| Fingerprint | Bit/Smiles | Feature Structure                                 | Score | Mutagen in training set |
|-------------|------------|---------------------------------------------------|-------|-------------------------|
| SCFP_12     | -577289847 | <br>[*][c]1:[cH]:[cH]:[c]<br>(OC):[cH]:[c]:1C=[*] | 0.399 | 9 out of 10             |

|                                               |                   |                                                                                                                                   |              |                                |
|-----------------------------------------------|-------------------|-----------------------------------------------------------------------------------------------------------------------------------|--------------|--------------------------------|
| SCFP_12                                       | -1971137145       | 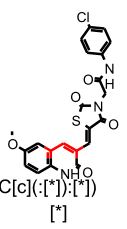<br>[*]C(=C[c](:[*]):[*])<br>[*]               | 0.167        | 225 out of 333                 |
| SCFP_12                                       | -496409612        | <br>[*][c](:[*]):[cH]:[cH]<br>]:[*]            | 0.0771       | 2616 out of 4239               |
| <b>Top Features for negative contribution</b> |                   |                                                                                                                                   |              |                                |
| <b>Fingerprint</b>                            | <b>Bit/Smiles</b> | <b>Feature Structure</b>                                                                                                          | <b>Score</b> | <b>Mutagen in training set</b> |
| SCFP_12                                       | -178170739        | <br>[*]N[c]1:[cH]:[cH]:[c<br>](Cl):[cH]:[cH]:1 | -1.57        | 1 out of 15                    |
| SCFP_12                                       | -316886873        | <br>[*]C=C1/S[*][*]C1=[<br>*]                 | -0.998       | 0 out of 3                     |
| SCFP_12                                       | -1630519606       | <br>[*]=C1[*][*]C(=[*])S1                    | -0.998       | 0 out of 3                     |

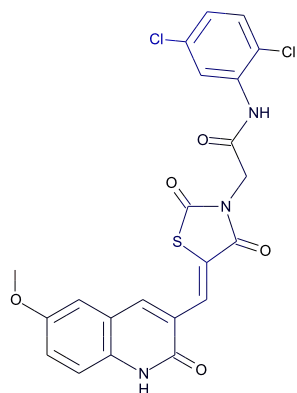

$C_{22}H_{15}Cl_2N_3O_5S$

Molecular Weight: 504.3426

ALogP: 3.479

Rotatable Bonds: 5

Acceptors: 6

Donors: 2

## Model Prediction

Prediction: Non-Mutagen

Probability: 0.46

Enrichment: 0.824

Bayesian Score: -8.4

Mahalanobis Distance: 12.3

Mahalanobis Distance p-value: 0.000231

Prediction: Positive if the Bayesian score is above the estimated best cutoff value from minimizing the false positive and false negative rate.

Probability: The estimated probability that the sample is in the positive category. This assumes that the Bayesian score follows a normal distribution and is different from the prediction using a cutoff.

Enrichment: An estimate of enrichment, that is, the increased likelihood (versus random) of this sample being in the category.

Bayesian Score: The standard Laplacian-modified Bayesian score.

Mahalanobis Distance: The Mahalanobis distance (MD) is the distance to the center of the training data. The larger the MD, the less trustworthy the prediction.

Mahalanobis Distance p-value: The p-value gives the fraction of training data with an MD greater than or equal to the one for the given sample, assuming normally distributed data. The smaller the p-value, the less trustworthy the prediction. For highly non-normal X properties (e.g., fingerprints), the MD p-value is wildly inaccurate.

## Structural Similar Compounds

| Name               | 55256-55-8                                       | 80266-02-0                                       | 83621-06-1                                       |
|--------------------|--------------------------------------------------|--------------------------------------------------|--------------------------------------------------|
| Structure          |                                                  |                                                  |                                                  |
| Actual Endpoint    | Mutagen                                          | Mutagen                                          | Non-Mutagen                                      |
| Predicted Endpoint | Mutagen                                          | Mutagen                                          | Non-Mutagen                                      |
| Distance           | 0.633                                            | 0.636                                            | 0.637                                            |
| Reference          | Kazius et. al., J. Med. Chem. (2005) 48, 312-320 | Kazius et. al., J. Med. Chem. (2005) 48, 312-320 | Kazius et. al., J. Med. Chem. (2005) 48, 312-320 |

## Model Applicability

Unknown features are fingerprint features in the query molecule, but not found or appearing too infrequently in the training set.

1. All properties and OPS components are within expected ranges.

## Feature Contribution

### Top features for positive contribution

| Fingerprint | Bit/Smiles | Feature Structure                       | Score | Mutagen in training set |
|-------------|------------|-----------------------------------------|-------|-------------------------|
| SCFP_12     | 1562412908 | <br>[*]N[c]1:[cH]:[*]:[cH]:[cH]:[c]:1Cl | 0.442 | 5 out of 5              |



|                                               |                   |                                                                                                                                                      |              |                                |
|-----------------------------------------------|-------------------|------------------------------------------------------------------------------------------------------------------------------------------------------|--------------|--------------------------------|
| SCFP_12                                       | -345817764        | 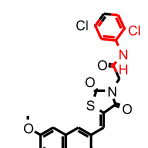<br><chem>[*]C(=[*])N(c1ccc(Cl)cc1)C(=O)N[C@@H](O)C(=O)S1</chem>  | 0.442        | 5 out of 5                     |
| SCFP_12                                       | -577289847        | <br><chem>[*][c]1:[cH]:[cH]:[c]([*])C(=O)N[C@@H](O)C(=O)S1</chem> | 0.399        | 9 out of 10                    |
| <b>Top Features for negative contribution</b> |                   |                                                                                                                                                      |              |                                |
| <b>Fingerprint</b>                            | <b>Bit/Smiles</b> | <b>Feature Structure</b>                                                                                                                             | <b>Score</b> | <b>Mutagen in training set</b> |
| SCFP_12                                       | -1630519606       | <br><chem>[*]=C1[*][*]C(=[*])S1</chem>                            | -0.998       | 0 out of 3                     |
| SCFP_12                                       | -316886873        | <br><chem>[*]C=C1/S[*][*]C1=[*]</chem>                           | -0.998       | 0 out of 3                     |
| SCFP_12                                       | 1907954607        | <br><chem>[*]N[c]1:[cH]:[c]([*])C(=O)N[C@@H](O)C(=O)S1</chem>   | -0.762       | 0 out of 2                     |

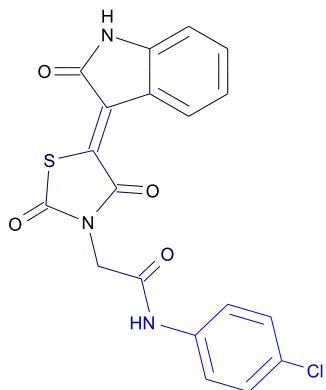

$C_{19}H_{12}ClN_3O_4S$

Molecular Weight: 413.83428

ALogP: 2.363

Rotatable Bonds: 3

Acceptors: 5

Donors: 2

## Model Prediction

Prediction: Non-Mutagen

Probability: 0.35

Enrichment: 0.626

Bayesian Score: -10.7

Mahalanobis Distance: 11.5

Mahalanobis Distance p-value: 0.0055

Prediction: Positive if the Bayesian score is above the estimated best cutoff value from minimizing the false positive and false negative rate.

Probability: The estimated probability that the sample is in the positive category. This assumes that the Bayesian score follows a normal distribution and is different from the prediction using a cutoff.

Enrichment: An estimate of enrichment, that is, the increased likelihood (versus random) of this sample being in the category.

Bayesian Score: The standard Laplacian-modified Bayesian score.

Mahalanobis Distance: The Mahalanobis distance (MD) is the distance to the center of the training data. The larger the MD, the less trustworthy the prediction.

Mahalanobis Distance p-value: The p-value gives the fraction of training data with an MD greater than or equal to the one for the given sample, assuming normally distributed data. The smaller the p-value, the less trustworthy the prediction. For highly non-normal X properties (e.g., fingerprints), the MD p-value is wildly inaccurate.

## Structural Similar Compounds

| Name               | 97919-22-7                                       | 98644-23-6                                       | Chlorendic acid                           |
|--------------------|--------------------------------------------------|--------------------------------------------------|-------------------------------------------|
| Structure          |                                                  |                                                  |                                           |
| Actual Endpoint    | Non-Mutagen                                      | Mutagen                                          | Non-Mutagen                               |
| Predicted Endpoint | Non-Mutagen                                      | Mutagen                                          | Non-Mutagen                               |
| Distance           | 0.581                                            | 0.600                                            | 0.602                                     |
| Reference          | Kazius et. al., J. Med. Chem. (2005) 48, 312-320 | Kazius et. al., J. Med. Chem. (2005) 48, 312-320 | Environ. Mol. Mut. 16(Suppl 18):1-14;1990 |

## Model Applicability

Unknown features are fingerprint features in the query molecule, but not found or appearing too infrequently in the training set.

- All properties and OPS components are within expected ranges.

## Feature Contribution

### Top features for positive contribution

| Fingerprint | Bit/Smiles  | Feature Structure                         | Score | Mutagen in training set |
|-------------|-------------|-------------------------------------------|-------|-------------------------|
| SCFP_12     | -1379591900 | <br>[*][c]1:[*]:[cH]:[cH]<br>:[cH]:[cH]:1 | 0.108 | 1480 out of 2326        |

|                                               |                   |                                                                                                                                            |              |                                |
|-----------------------------------------------|-------------------|--------------------------------------------------------------------------------------------------------------------------------------------|--------------|--------------------------------|
| SCFP_12                                       | -834984590        | 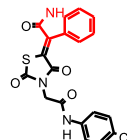<br>[*]=C1N[c]2:[cH]:[cH]<br>:[cH]:[cH]:[c]:2C1=[<br>*] | 0.1          | 2 out of 3                     |
| SCFP_12                                       | -496409612        | <br>[*][c](:[*]):[cH]:[cH]<br>:[*]                      | 0.0771       | 2616 out of 4239               |
| <b>Top Features for negative contribution</b> |                   |                                                                                                                                            |              |                                |
| <b>Fingerprint</b>                            | <b>Bit/Smiles</b> | <b>Feature Structure</b>                                                                                                                   | <b>Score</b> | <b>Mutagen in training set</b> |
| SCFP_12                                       | -178170739        | <br>[*]N[c]1:[cH]:[cH]:[c<br>(Cl):[cH]:[cH]:1           | -1.57        | 1 out of 15                    |
| SCFP_12                                       | -1630519606       | <br>[*]=C1[*][*]C(=[*])S1                              | -0.998       | 0 out of 3                     |
| SCFP_12                                       | -316886873        | <br>[*]C=C1/S[*][*]C1=[<br>*]                         | -0.998       | 0 out of 3                     |

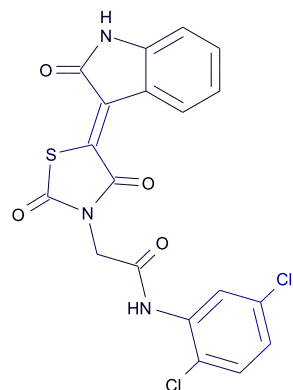

$C_{19}H_{11}Cl_2N_3O_4S$

Molecular Weight: 448.27933

ALogP: 3.028

Rotatable Bonds: 3

Acceptors: 5

Donors: 2

## Model Prediction

Prediction: Non-Mutagen

Probability: 0.475

Enrichment: 0.851

Bayesian Score: -8.07

Mahalanobis Distance: 11.6

Mahalanobis Distance p-value: 0.0049

Prediction: Positive if the Bayesian score is above the estimated best cutoff value from minimizing the false positive and false negative rate.

Probability: The estimated probability that the sample is in the positive category. This assumes that the Bayesian score follows a normal distribution and is different from the prediction using a cutoff.

Enrichment: An estimate of enrichment, that is, the increased likelihood (versus random) of this sample being in the category.

Bayesian Score: The standard Laplacian-modified Bayesian score.

Mahalanobis Distance: The Mahalanobis distance (MD) is the distance to the center of the training data. The larger the MD, the less trustworthy the prediction.

Mahalanobis Distance p-value: The p-value gives the fraction of training data with an MD greater than or equal to the one for the given sample, assuming normally distributed data. The smaller the p-value, the less trustworthy the prediction. For highly non-normal X properties (e.g., fingerprints), the MD p-value is wildly inaccurate.

## Structural Similar Compounds

| Name               | 98644-23-6                                       | TETRABROMOPHTHALIC ACID | Chlorendic acid                           |
|--------------------|--------------------------------------------------|-------------------------|-------------------------------------------|
| Structure          |                                                  |                         |                                           |
| Actual Endpoint    | Mutagen                                          | Non-Mutagen             | Non-Mutagen                               |
| Predicted Endpoint | Mutagen                                          | Non-Mutagen             | Non-Mutagen                               |
| Distance           | 0.614                                            | 0.617                   | 0.620                                     |
| Reference          | Kazius et. al., J. Med. Chem. (2005) 48, 312-320 | EMIC                    | Environ. Mol. Mut. 16(Suppl 18):1-14;1990 |

## Model Applicability

Unknown features are fingerprint features in the query molecule, but not found or appearing too infrequently in the training set.

1. All properties and OPS components are within expected ranges.

## Feature Contribution

### Top features for positive contribution

| Fingerprint | Bit/Smiles | Feature Structure                                   | Score | Mutagen in training set |
|-------------|------------|-----------------------------------------------------|-------|-------------------------|
| SCFP_12     | 345817764  | <br>[*]C(=[*])N[c]1:[cH]:[c]([(*)]:[*]:[cH]:[c]:1Cl | 0.442 | 5 out of 5              |

|                                               |                   |                                                                                                                                                     |              |                                |
|-----------------------------------------------|-------------------|-----------------------------------------------------------------------------------------------------------------------------------------------------|--------------|--------------------------------|
| SCFP_12                                       | 1562412908        | 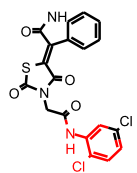<br><chem>[*]N[c]1:[cH]:[*]:[cH]:[cH]:[c]:1Cl</chem>             | 0.442        | 5 out of 5                     |
| SCFP_12                                       | -1490122748       | <br><chem>[*]C(=[*])N[c]1:[cH]:[c]([*]):[cH]:[cH]:[c]:1Cl</chem> | 0.241        | 1 out of 1                     |
| <b>Top Features for negative contribution</b> |                   |                                                                                                                                                     |              |                                |
| <b>Fingerprint</b>                            | <b>Bit/Smiles</b> | <b>Feature Structure</b>                                                                                                                            | <b>Score</b> | <b>Mutagen in training set</b> |
| SCFP_12                                       | -1630519606       | <br><chem>[*]=C1[*][*]C(=[*])S1</chem>                           | -0.998       | 0 out of 3                     |
| SCFP_12                                       | -316886873        | <br><chem>[*]C=C1/S[*][*]C1=[*]</chem>                          | -0.998       | 0 out of 3                     |
| SCFP_12                                       | 1907954607        | <br><chem>[*]N[c]1:[cH]:[c](Cl):[cH]:[cH]:[c]:1[*]</chem>      | -0.762       | 0 out of 2                     |

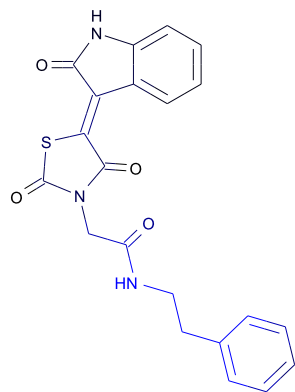

$C_{21}H_{17}N_3O_4S$

Molecular Weight: 407.44237

ALogP: 2.027

Rotatable Bonds: 5

Acceptors: 5

Donors: 2

## Model Prediction

Prediction: Non-Mutagen

Probability: 0.251

Enrichment: 0.449

Bayesian Score: -12.9

Mahalanobis Distance: 12.9

Mahalanobis Distance p-value: 8.1e-006

Prediction: Positive if the Bayesian score is above the estimated best cutoff value from minimizing the false positive and false negative rate.

Probability: The estimated probability that the sample is in the positive category. This assumes that the Bayesian score follows a normal distribution and is different from the prediction using a cutoff.

Enrichment: An estimate of enrichment, that is, the increased likelihood (versus random) of this sample being in the category.

Bayesian Score: The standard Laplacian-modified Bayesian score.

Mahalanobis Distance: The Mahalanobis distance (MD) is the distance to the center of the training data. The larger the MD, the less trustworthy the prediction.

Mahalanobis Distance p-value: The p-value gives the fraction of training data with an MD greater than or equal to the one for the given sample, assuming normally distributed data. The smaller the p-value, the less trustworthy the prediction. For highly non-normal X properties (e.g., fingerprints), the MD p-value is wildly inaccurate.

## Structural Similar Compounds

| Name               | 89784-39-4                                       | PENICILLIN G POTASSIUM | 4825-86-9                                        |
|--------------------|--------------------------------------------------|------------------------|--------------------------------------------------|
| Structure          |                                                  |                        |                                                  |
| Actual Endpoint    | Mutagen                                          | Non-Mutagen            | Non-Mutagen                                      |
| Predicted Endpoint | Mutagen                                          | Non-Mutagen            | Non-Mutagen                                      |
| Distance           | 0.587                                            | 0.591                  | 0.592                                            |
| Reference          | Kazius et. al., J. Med. Chem. (2005) 48, 312-320 | EMIC                   | Kazius et. al., J. Med. Chem. (2005) 48, 312-320 |

## Model Applicability

Unknown features are fingerprint features in the query molecule, but not found or appearing too infrequently in the training set.

1. All properties and OPS components are within expected ranges.

## Feature Contribution

### Top features for positive contribution

| Fingerprint | Bit/Smiles  | Feature Structure                     | Score | Mutagen in training set |
|-------------|-------------|---------------------------------------|-------|-------------------------|
| SCFP_12     | -1379591900 | <br>[*][c]1:[*]:[cH]:[cH]:[cH]:[cH]:1 | 0.108 | 1480 out of 2326        |

|                                               |                   |                                                                                                                                                           |              |                                |
|-----------------------------------------------|-------------------|-----------------------------------------------------------------------------------------------------------------------------------------------------------|--------------|--------------------------------|
| SCFP_12                                       | -834984590        | 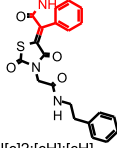<br><chem>[*]=C1N[c]2:[cH]:[cH]<br/>:[cH]:[cH]:[c]:2C1=[<br/>*]</chem> | 0.1          | 2 out of 3                     |
| SCFP_12                                       | -496409612        | <br><chem>[*][c](:[*]):[cH]:[cH]<br/>:[*]</chem>                       | 0.0771       | 2616 out of 4239               |
| <b>Top Features for negative contribution</b> |                   |                                                                                                                                                           |              |                                |
| <b>Fingerprint</b>                            | <b>Bit/Smiles</b> | <b>Feature Structure</b>                                                                                                                                  | <b>Score</b> | <b>Mutagen in training set</b> |
| SCFP_12                                       | -1849236245       | <br><chem>[*]NCC[c](:[cH]:[*]):<br/>[cH]:[*]</chem>                    | -1.61        | 0 out of 7                     |
| SCFP_12                                       | 647859032         | <br><chem>[*]CNC(=O)CN([*])[*]</chem>                                 | -1.19        | 0 out of 4                     |
| SCFP_12                                       | -1630519606       | <br><chem>[*]=C1[*][*]C(=[*])S1</chem>                               | -0.998       | 0 out of 3                     |

# Sorafenib

# TOPKAT\_Ames\_Mutagenicity

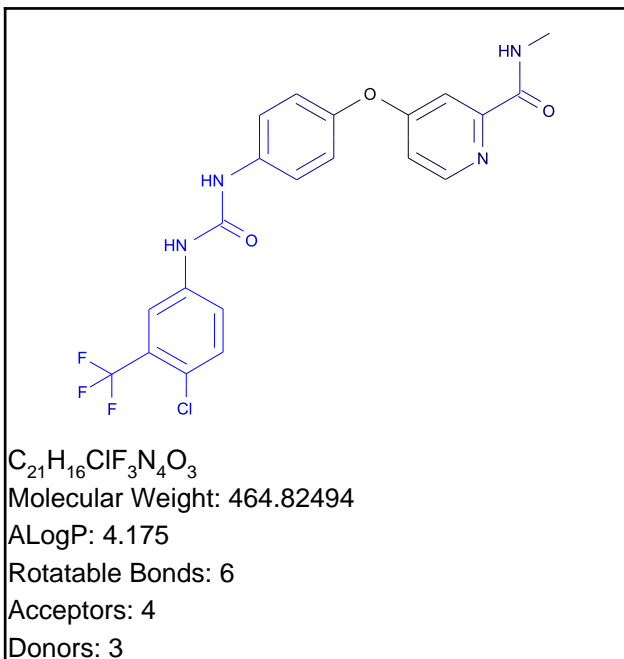

## Model Prediction

Prediction: Non-Mutagen

Probability: 0.0531

Enrichment: 0.0951

Bayesian Score: -19.7

Mahalanobis Distance: 13.1

Mahalanobis Distance p-value: 2.73e-006

Prediction: Positive if the Bayesian score is above the estimated best cutoff value from minimizing the false positive and false negative rate.

Probability: The estimated probability that the sample is in the positive category. This assumes that the Bayesian score follows a normal distribution and is different from the prediction using a cutoff.

Enrichment: An estimate of enrichment, that is, the increased likelihood (versus random) of this sample being in the category.

Bayesian Score: The standard Laplacian-modified Bayesian score.

Mahalanobis Distance: The Mahalanobis distance (MD) is the distance to the center of the training data. The larger the MD, the less trustworthy the prediction.

Mahalanobis Distance p-value: The p-value gives the fraction of training data with an MD greater than or equal to the one for the given sample, assuming normally distributed data. The smaller the p-value, the less trustworthy the prediction. For highly non-normal X properties (e.g., fingerprints), the MD p-value is wildly inaccurate.

## Structural Similar Compounds

| Name               | GLYBURIDE                                                                           | 38914-96-4                                                                          | 93957-54-1                                                                                                                                                          |
|--------------------|-------------------------------------------------------------------------------------|-------------------------------------------------------------------------------------|---------------------------------------------------------------------------------------------------------------------------------------------------------------------|
| Structure          | 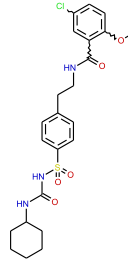 |  |                                                                                  |
| Actual Endpoint    | Non-Mutagen                                                                         | Mutagen                                                                             | Non-Mutagen                                                                                                                                                         |
| Predicted Endpoint | Non-Mutagen                                                                         | Mutagen                                                                             | Non-Mutagen                                                                                                                                                         |
| Distance           | 0.590                                                                               | 0.592                                                                               | 0.600                                                                                                                                                               |
| Reference          | PDR 1994                                                                            | Kazius et. al., J. Med. Chem. (2005) 48, 312-320                                    | US Environmental Protection Agency at <a href="http://www.epa.gov/NCCT/dsstox/sdf_isscan_external.html">http://www.epa.gov/NCCT/dsstox/sdf_isscan_external.html</a> |

## Model Applicability

Unknown features are fingerprint features in the query molecule, but not found or appearing too infrequently in the training set.

- All properties and OPS components are within expected ranges.

## Feature Contribution

### Top features for positive contribution

| Fingerprint | Bit/Smiles | Feature Structure                                                                                                                                           | Score | Mutagen in training set |
|-------------|------------|-------------------------------------------------------------------------------------------------------------------------------------------------------------|-------|-------------------------|
| SCFP_12     | 347281112  | 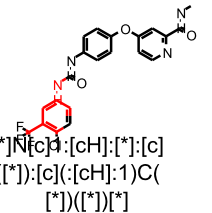<br><chem>[*]N(c1c:[cH]:[*]:[c]([*]):[c]([cH]:1)C([*])([*])[*])</chem> | 0.337 | 18 out of 22            |



|                                               |                   |                                                                                                                                                                         |              |                                |
|-----------------------------------------------|-------------------|-------------------------------------------------------------------------------------------------------------------------------------------------------------------------|--------------|--------------------------------|
| SCFP_12                                       | 1208843554        | 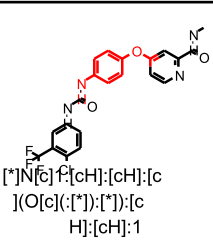<br>[*]N(c)F[cH]:[cH]:[c<br>)O(c):[*]:[*]:[c<br>H]:[cH]:1                             | 0.337        | 6 out of 7                     |
| SCFP_12                                       | -1943080297       | <br>[*]N(c)F[cH]:[cH]:[c<br>)O(c)2:[cH]:[cH]:[*<br>]:[c]([*]):[cH]:2:[<br>cH]:[cH]:1 | 0.304        | 5 out of 6                     |
| <b>Top Features for negative contribution</b> |                   |                                                                                                                                                                         |              |                                |
| <b>Fingerprint</b>                            | <b>Bit/Smiles</b> | <b>Feature Structure</b>                                                                                                                                                | <b>Score</b> | <b>Mutagen in training set</b> |
| SCFP_12                                       | 816802409         | <br>[*]NC(=O)N(c)1:[cH]:[<br>cH]:[c]([*]):[cH]:[c<br>H]:1                            | -1.82        | 0 out of 9                     |
| SCFP_12                                       | -1903175541       | <br>[*][c]([*]):[c]:[cH<br>]:[*]C(F)(F)F                                            | -1.51        | 3 out of 30                    |
| SCFP_12                                       | -300280774        | <br>[*]:[c]([*])C(F)(F)F                                                           | -1.51        | 3 out of 30                    |

# Sunitinib

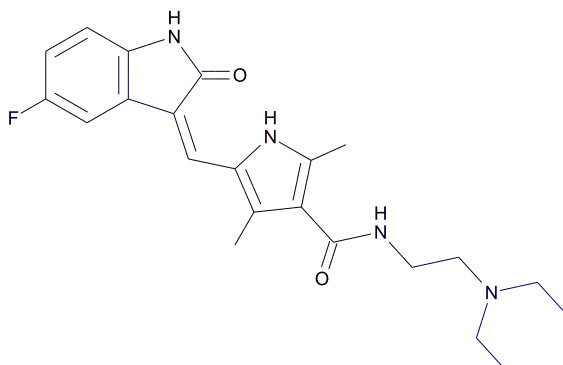

$C_{22}H_{27}FN_4O_2$

Molecular Weight: 398.47378

ALogP: 2.997

Rotatable Bonds: 7

Acceptors: 3

Donors: 3

## Model Prediction

Prediction: Non-Mutagen

Probability: 0.623

Enrichment: 1.11

Bayesian Score: -4.39

Mahalanobis Distance: 14.8

Mahalanobis Distance p-value: 8.05e-012

Prediction: Positive if the Bayesian score is above the estimated best cutoff value from minimizing the false positive and false negative rate.

Probability: The estimated probability that the sample is in the positive category. This assumes that the Bayesian score follows a normal distribution and is different from the prediction using a cutoff.

Enrichment: An estimate of enrichment, that is, the increased likelihood (versus random) of this sample being in the category.

Bayesian Score: The standard Laplacian-modified Bayesian score.

Mahalanobis Distance: The Mahalanobis distance (MD) is the distance to the center of the training data. The larger the MD, the less trustworthy the prediction.

Mahalanobis Distance p-value: The p-value gives the fraction of training data with an MD greater than or equal to the one for the given sample, assuming normally distributed data. The smaller the p-value, the less trustworthy the prediction. For highly non-normal X properties (e.g., fingerprints), the MD p-value is wildly inaccurate.

# TOPKAT\_Ames\_Mutagenicity

## Structural Similar Compounds

| Name               | 38914-96-4                                       | 93957-54-1                                                                                                                                                        | IA 4 N-oxide                                                                                                         |
|--------------------|--------------------------------------------------|-------------------------------------------------------------------------------------------------------------------------------------------------------------------|----------------------------------------------------------------------------------------------------------------------|
| Structure          |                                                  |                                                                                                                                                                   |                                                                                                                      |
| Actual Endpoint    | Mutagen                                          | Non-Mutagen                                                                                                                                                       | Mutagen                                                                                                              |
| Predicted Endpoint | Mutagen                                          | Non-Mutagen                                                                                                                                                       | Mutagen                                                                                                              |
| Distance           | 0.597                                            | 0.602                                                                                                                                                             | 0.610                                                                                                                |
| Reference          | Kazius et. al., J. Med. Chem. (2005) 48, 312-320 | US Environmental Protection Agency at <a href="http://www.epa.gov/NCCT/dsstox/sdf_isscan_externa.html">http://www.epa.gov/NCCT/dsstox/sdf_isscan_externa.html</a> | Contrera, J.F., Matthews, E.J., Kruhlak, N.L., and Benz, R.D., Regulatory Toxicology and Pharmacology 2005, 313-323. |

## Model Applicability

Unknown features are fingerprint features in the query molecule, but not found or appearing too infrequently in the training set.

1. All properties and OPS components are within expected ranges.

## Feature Contribution

### Top features for positive contribution

| Fingerprint | Bit/Smiles | Feature Structure                   | Score | Mutagen in training set |
|-------------|------------|-------------------------------------|-------|-------------------------|
| SCFP_12     | 1024473425 | <br><chem>[*]N[*]CCNC(=O)[*]</chem> | 0.442 | 13 out of 14            |

|                                               |                   |                                                                                                                                                                                     |              |                                |
|-----------------------------------------------|-------------------|-------------------------------------------------------------------------------------------------------------------------------------------------------------------------------------|--------------|--------------------------------|
| SCFP_12                                       | 1232358329        | 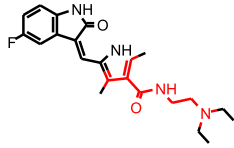<br><chem>[*]N([*])CCNC(=O)[*]c1</chem><br><chem>:c1([*]):[*]:[*]:c</chem><br><chem>:1[*]</chem> | 0.424        | 11 out of 12                   |
| SCFP_12                                       | 820030350         | <br><chem>[*]CN(C[*])CCNC(=O)[*]c</chem><br><chem>1([*]):1[*]</chem>                             | 0.424        | 11 out of 12                   |
| <b>Top Features for negative contribution</b> |                   |                                                                                                                                                                                     |              |                                |
| <b>Fingerprint</b>                            | <b>Bit/Smiles</b> | <b>Feature Structure</b>                                                                                                                                                            | <b>Score</b> | <b>Mutagen in training set</b> |
| SCFP_12                                       | -495096007        | <br><chem>[*]NCCN(CC)CC</chem>                                                                   | -0.762       | 0 out of 2                     |
| SCFP_12                                       | 1798334293        | <br><chem>[*]C(=C1C(=[*])[*])[*]</chem><br><chem>:c1:1[*]</chem>                                | -0.525       | 5 out of 16                    |
| SCFP_12                                       | 32698025          | <br><chem>[*]:c1([*])C(=O)NCC</chem><br><chem>N(CC)CC</chem>                                   | -0.452       | 0 out of 1                     |

10a

TOPKAT\_Developmental\_Toxicity\_Potential

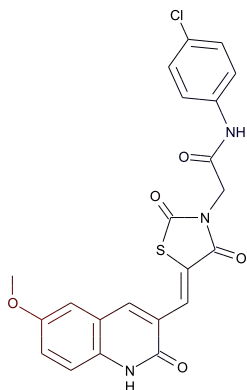C<sub>22</sub>H<sub>16</sub>ClN<sub>3</sub>O<sub>5</sub>S

Molecular Weight: 469.89753

ALogP: 2.815

Rotatable Bonds: 5

Acceptors: 6

Donors: 2

## Model Prediction

Prediction: Toxic

Probability: 0.619

Enrichment: 1.18

Bayesian Score: 1.83

Mahalanobis Distance: 12.2

Mahalanobis Distance p-value: 1.57e-005

Prediction: Positive if the Bayesian score is above the estimated best cutoff value from minimizing the false positive and false negative rate.

Probability: The estimated probability that the sample is in the positive category. This assumes that the Bayesian score follows a normal distribution and is different from the prediction using a cutoff.

Enrichment: An estimate of enrichment, that is, the increased likelihood (versus random) of this sample being in the category.

Bayesian Score: The standard Laplacian-modified Bayesian score.

Mahalanobis Distance: The Mahalanobis distance (MD) is the distance to the center of the training data. The larger the MD, the less trustworthy the prediction.

Mahalanobis Distance p-value: The p-value gives the fraction of training data with an MD greater than or equal to the one for the given sample, assuming normally distributed data. The smaller the p-value, the less trustworthy the prediction. For highly non-normal X properties (e.g., fingerprints), the MD p-value is wildly inaccurate.

## Structural Similar Compounds

| Name               | Ochratoxin a                             | Amsacrine                             | Acemetacin                     |
|--------------------|------------------------------------------|---------------------------------------|--------------------------------|
| Structure          |                                          |                                       |                                |
| Actual Endpoint    | Toxic                                    | Toxic                                 | Non-Toxic                      |
| Predicted Endpoint | Toxic                                    | Toxic                                 | Non-Toxic                      |
| Distance           | 0.608                                    | 0.621                                 | 0.648                          |
| Reference          | Toxicol Appl Pharmacol 37(2):331-8; 1976 | Fundam Appl Toxicol 7(2):214-20; 1986 | Oyo Yakuri 22(6):777-786; 1981 |

## Model Applicability

Unknown features are fingerprint features in the query molecule, but not found or appearing too infrequently in the training set.

1. All properties and OPS components are within expected ranges.

## Feature Contribution

### Top features for positive contribution

| Fingerprint | Bit/Smiles | Feature Structure                                  | Score | Toxic in training set |
|-------------|------------|----------------------------------------------------|-------|-----------------------|
| SCFP_6      | 1237755852 | <br>[*][c]1:[*]:[cH]:[cH]:[cH]:[cH]:[c](OC):[cH]:1 | 0.453 | 8 out of 9            |

| SCFP_6                                 | 1971137145 | 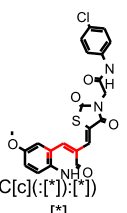<br>[*]C(=C[c](:[*]):[*])<br>[*]                        | 0.431  | 7 out of 8            |
|----------------------------------------|------------|--------------------------------------------------------------------------------------------------------------------------------------------|--------|-----------------------|
| SCFP_6                                 | 591469355  | <br>[*]:[cH]:[c](OC):[cH]<br>:[*]                       | 0.411  | 10 out of 12          |
| Top Features for negative contribution |            |                                                                                                                                            |        |                       |
| Fingerprint                            | Bit/Smiles | Feature Structure                                                                                                                          | Score  | Toxic in training set |
| SCFP_6                                 | 399659969  | <br>[*]CN1C(=[*])[*]C1<br>=[*]                          | -0.526 | 3 out of 11           |
| SCFP_6                                 | 1420330831 | <br>[*]=C1[*]=C[c]2:[cH]?<br>[*]:[cH]:[cH]:[c]:2N<br>1 | -0.422 | 0 out of 1            |
| SCFP_6                                 | 2097618059 | <br>[*]CC(=O)N(c)([cH])[<br>]:[cH]:[*]                | -0.422 | 0 out of 1            |

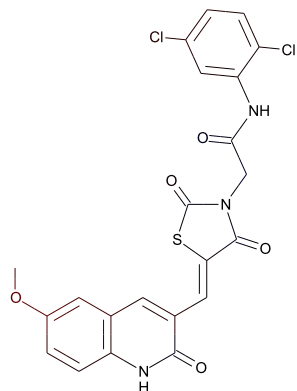

$C_{22}H_{15}Cl_2N_3O_5S$

Molecular Weight: 504.3426

ALogP: 3.479

Rotatable Bonds: 5

Acceptors: 6

Donors: 2

## Model Prediction

**Prediction: Toxic**

Probability: 0.662

Enrichment: 1.26

Bayesian Score: 2.95

Mahalanobis Distance: 12.2

Mahalanobis Distance p-value: 1.58e-005

Prediction: Positive if the Bayesian score is above the estimated best cutoff value from minimizing the false positive and false negative rate.

Probability: The estimated probability that the sample is in the positive category. This assumes that the Bayesian score follows a normal distribution and is different from the prediction using a cutoff.

Enrichment: An estimate of enrichment, that is, the increased likelihood (versus random) of this sample being in the category.

Bayesian Score: The standard Laplacian-modified Bayesian score.

Mahalanobis Distance: The Mahalanobis distance (MD) is the distance to the center of the training data. The larger the MD, the less trustworthy the prediction.

Mahalanobis Distance p-value: The p-value gives the fraction of training data with an MD greater than or equal to the one for the given sample, assuming normally distributed data. The smaller the p-value, the less trustworthy the prediction. For highly non-normal X properties (e.g., fingerprints), the MD p-value is wildly inaccurate.

## Structural Similar Compounds

| Name               | Amsacrine                             | Ochratoxin a                             | Acemetacin                     |
|--------------------|---------------------------------------|------------------------------------------|--------------------------------|
| Structure          |                                       |                                          |                                |
| Actual Endpoint    | Toxic                                 | Toxic                                    | Non-Toxic                      |
| Predicted Endpoint | Toxic                                 | Toxic                                    | Non-Toxic                      |
| Distance           | 0.626                                 | 0.633                                    | 0.648                          |
| Reference          | Fundam Appl Toxicol 7(2):214-20; 1986 | Toxicol Appl Pharmacol 37(2):331-8; 1976 | Oyo Yakuri 22(6):777-786; 1981 |

## Model Applicability

Unknown features are fingerprint features in the query molecule, but not found or appearing too infrequently in the training set.

1. All properties and OPS components are within expected ranges.

## Feature Contribution

### Top features for positive contribution

| Fingerprint | Bit/Smiles | Feature Structure                            | Score | Toxic in training set |
|-------------|------------|----------------------------------------------|-------|-----------------------|
| SCFP_6      | 1237755852 | <br>[*][c]1:[*]:[cH]:[cH]<br>:[c](OC):[cH]:1 | 0.453 | 8 out of 9            |

|                                               |                   |                                                                                                                                                                                    |              |                              |
|-----------------------------------------------|-------------------|------------------------------------------------------------------------------------------------------------------------------------------------------------------------------------|--------------|------------------------------|
| SCFP_6                                        | -1971137145       | 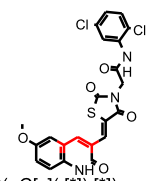<br><chem>[*]C(=C[c](:[*]):[*])</chem><br><chem>[*]</chem>                                      | 0.431        | 7 out of 8                   |
| SCFP_6                                        | 591469355         | <br><chem>[*]:[cH]:[c](OC):[cH]</chem><br><chem>:[*]</chem>                                     | 0.411        | 10 out of 12                 |
| <b>Top Features for negative contribution</b> |                   |                                                                                                                                                                                    |              |                              |
| <b>Fingerprint</b>                            | <b>Bit/Smiles</b> | <b>Feature Structure</b>                                                                                                                                                           | <b>Score</b> | <b>Toxic in training set</b> |
| SCFP_6                                        | 399659969         | <br><chem>[*]CN1C(=[*])[*]C1</chem><br><chem>=[*]</chem>                                        | -0.526       | 3 out of 11                  |
| SCFP_6                                        | 2097618059        | <br><chem>[*]CC(=O)N[c](:[cH]:[cH])</chem><br><chem>:[*]</chem>                                | -0.422       | 0 out of 1                   |
| SCFP_6                                        | 1420330831        | <br><chem>[*]=C1[*]=C[c]2:[cH]:</chem><br><chem>[*]:[cH]:[cH]:[c]:2N</chem><br><chem>1</chem> | -0.422       | 0 out of 1                   |

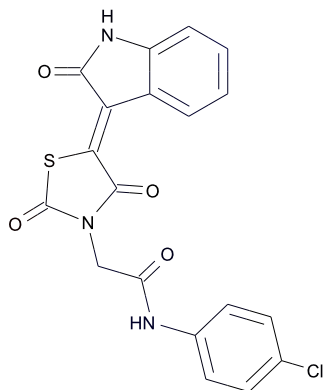

$C_{19}H_{12}ClN_3O_4S$

Molecular Weight: 413.83428

ALogP: 2.363

Rotatable Bonds: 3

Acceptors: 5

Donors: 2

## Model Prediction

Prediction: Non-Toxic

Probability: 0.501

Enrichment: 0.953

Bayesian Score: -1.26

Mahalanobis Distance: 8.02

Mahalanobis Distance p-value: 0.595

Prediction: Positive if the Bayesian score is above the estimated best cutoff value from minimizing the false positive and false negative rate.

Probability: The estimated probability that the sample is in the positive category. This assumes that the Bayesian score follows a normal distribution and is different from the prediction using a cutoff.

Enrichment: An estimate of enrichment, that is, the increased likelihood (versus random) of this sample being in the category.

Bayesian Score: The standard Laplacian-modified Bayesian score.

Mahalanobis Distance: The Mahalanobis distance (MD) is the distance to the center of the training data. The larger the MD, the less trustworthy the prediction.

Mahalanobis Distance p-value: The p-value gives the fraction of training data with an MD greater than or equal to the one for the given sample, assuming normally distributed data. The smaller the p-value, the less trustworthy the prediction. For highly non-normal X properties (e.g., fingerprints), the MD p-value is wildly inaccurate.

## Structural Similar Compounds

| Name               | D&C Yellow 8                       | Sulfonylurea Gliclazide            | Tiamamide .HCl (Free base form)         |
|--------------------|------------------------------------|------------------------------------|-----------------------------------------|
| Structure          |                                    |                                    |                                         |
| Actual Endpoint    | Non-Toxic                          | Toxic                              | Toxic                                   |
| Predicted Endpoint | Non-Toxic                          | Toxic                              | Toxic                                   |
| Distance           | 0.612                              | 0.620                              | 0.623                                   |
| Reference          | Food Chem Toxicol 24:819-823; 1986 | Yakuri to Chiryō 9:3551-3571; 1981 | Arzneimittelforschung 23(4):504-8; 1973 |

## Model Applicability

Unknown features are fingerprint features in the query molecule, but not found or appearing too infrequently in the training set.

1. All properties and OPS components are within expected ranges.

## Feature Contribution

### Top features for positive contribution

| Fingerprint | Bit/Smiles | Feature Structure    | Score | Toxic in training set |
|-------------|------------|----------------------|-------|-----------------------|
| SCFP_6      | 199205675  | <br>[*]N1[*][*]SC1=O | 0.271 | 1 out of 1            |



|                                               |                   |                                                                                                                                                 |              |                              |
|-----------------------------------------------|-------------------|-------------------------------------------------------------------------------------------------------------------------------------------------|--------------|------------------------------|
| SCFP_6                                        | 2102703671        | 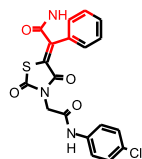<br><chem>[*]C1=[*][c(:[*]):[c](NC1=O):[cH]:[*]</chem>       | 0.271        | 1 out of 1                   |
| SCFP_6                                        | -587539325        | <br><chem>[*]N([*])CC(=[*])[*]</chem>                        | 0.271        | 1 out of 1                   |
| <b>Top Features for negative contribution</b> |                   |                                                                                                                                                 |              |                              |
| <b>Fingerprint</b>                            | <b>Bit/Smiles</b> | <b>Feature Structure</b>                                                                                                                        | <b>Score</b> | <b>Toxic in training set</b> |
| SCFP_6                                        | 399659969         | <br><chem>[*]CN1C(=[*])[*][*]C1=[*]</chem>                   | -0.526       | 3 out of 11                  |
| SCFP_6                                        | 1420330831        | <br><chem>[*]=C1[*]=C[c]2:[cH]:[*]:[cH]:[cH]:[c]:2N1</chem> | -0.422       | 0 out of 1                   |
| SCFP_6                                        | 2097618059        | <br><chem>[*]CC(=O)N[c](c[cH]:[cH]:[cH]:[*])</chem>        | -0.422       | 0 out of 1                   |

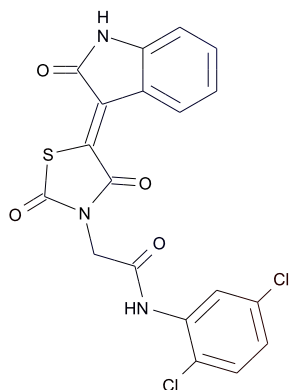

$C_{19}H_{11}Cl_2N_3O_4S$

Molecular Weight: 448.27933

ALogP: 3.028

Rotatable Bonds: 3

Acceptors: 5

Donors: 2

## Model Prediction

Prediction: Non-Toxic

Probability: 0.51

Enrichment: 0.969

Bayesian Score: -1.03

Mahalanobis Distance: 8.01

Mahalanobis Distance p-value: 0.602

Prediction: Positive if the Bayesian score is above the estimated best cutoff value from minimizing the false positive and false negative rate.

Probability: The estimated probability that the sample is in the positive category. This assumes that the Bayesian score follows a normal distribution and is different from the prediction using a cutoff.

Enrichment: An estimate of enrichment, that is, the increased likelihood (versus random) of this sample being in the category.

Bayesian Score: The standard Laplacian-modified Bayesian score.

Mahalanobis Distance: The Mahalanobis distance (MD) is the distance to the center of the training data. The larger the MD, the less trustworthy the prediction.

Mahalanobis Distance p-value: The p-value gives the fraction of training data with an MD greater than or equal to the one for the given sample, assuming normally distributed data. The smaller the p-value, the less trustworthy the prediction. For highly non-normal X properties (e.g., fingerprints), the MD p-value is wildly inaccurate.

## Structural Similar Compounds

| Name               | D&C Yellow 8                          | Ochratoxin a                                | Amsacrine                                |
|--------------------|---------------------------------------|---------------------------------------------|------------------------------------------|
| Structure          |                                       |                                             |                                          |
| Actual Endpoint    | Non-Toxic                             | Toxic                                       | Toxic                                    |
| Predicted Endpoint | Non-Toxic                             | Toxic                                       | Toxic                                    |
| Distance           | 0.628                                 | 0.645                                       | 0.649                                    |
| Reference          | Food Chem Toxicol<br>24:819-823; 1986 | Toxicol Appl Pharmacol<br>37(2):331-8; 1976 | Fundam Appl Toxicol<br>7(2):214-20; 1986 |

## Model Applicability

Unknown features are fingerprint features in the query molecule, but not found or appearing too infrequently in the training set.

1. All properties and OPS components are within expected ranges.

## Feature Contribution

### Top features for positive contribution

| Fingerprint | Bit/Smiles | Feature Structure                              | Score | Toxic in training set |
|-------------|------------|------------------------------------------------|-------|-----------------------|
| SCFP_6      | 2102703671 | <br>[*]C1=[*][c]([*]):[c]<br>](NC1=O):[cH]:[*] | 0.271 | 1 out of 1            |

|                                               |                   |                                                                                                                                                     |              |                              |
|-----------------------------------------------|-------------------|-----------------------------------------------------------------------------------------------------------------------------------------------------|--------------|------------------------------|
| SCFP_6                                        | -534413823        | 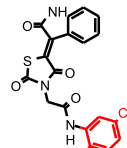<br><chem>[*][c]1:[cH]:[c](Cl):[cH]:[cH]:[c]:1Cl</chem>          | 0.271        | 1 out of 1                   |
| SCFP_6                                        | 199205675         | <br><chem>[*]N1[*][*]SC1=O</chem>                                | 0.271        | 1 out of 1                   |
| <b>Top Features for negative contribution</b> |                   |                                                                                                                                                     |              |                              |
| <b>Fingerprint</b>                            | <b>Bit/Smiles</b> | <b>Feature Structure</b>                                                                                                                            | <b>Score</b> | <b>Toxic in training set</b> |
| SCFP_6                                        | 399659969         | <br><chem>[*]CN1C(=[*])[*][*]C1=[*]</chem>                       | -0.526       | 3 out of 11                  |
| SCFP_6                                        | 2097618059        | <br><chem>[*]CC(=O)N(c)[c]([cH]:[cH]:[cH]:[cH]:[cH]:[*])</chem> | -0.422       | 0 out of 1                   |
| SCFP_6                                        | 1420330831        | <br><chem>[*]=C1[*]=C[c]2:[cH]:[cH]:[cH]:[cH]:[c]:2N1</chem>   | -0.422       | 0 out of 1                   |

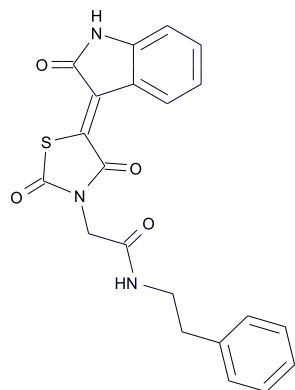

$C_{21}H_{17}N_3O_4S$

Molecular Weight: 407.44237

ALogP: 2.027

Rotatable Bonds: 5

Acceptors: 5

Donors: 2

## Model Prediction

Prediction: Non-Toxic

Probability: 0.493

Enrichment: 0.937

Bayesian Score: -1.49

Mahalanobis Distance: 11.3

Mahalanobis Distance p-value: 0.000337

Prediction: Positive if the Bayesian score is above the estimated best cutoff value from minimizing the false positive and false negative rate.

Probability: The estimated probability that the sample is in the positive category. This assumes that the Bayesian score follows a normal distribution and is different from the prediction using a cutoff.

Enrichment: An estimate of enrichment, that is, the increased likelihood (versus random) of this sample being in the category.

Bayesian Score: The standard Laplacian-modified Bayesian score.

Mahalanobis Distance: The Mahalanobis distance (MD) is the distance to the center of the training data. The larger the MD, the less trustworthy the prediction.

Mahalanobis Distance p-value: The p-value gives the fraction of training data with an MD greater than or equal to the one for the given sample, assuming normally distributed data. The smaller the p-value, the less trustworthy the prediction. For highly non-normal X properties (e.g., fingerprints), the MD p-value is wildly inaccurate.

## Structural Similar Compounds

| Name               | Ochratoxin a                             | Tiamamide .HCl (Free base form)         | Sulfonylurea Gliclazide            |
|--------------------|------------------------------------------|-----------------------------------------|------------------------------------|
| Structure          |                                          |                                         |                                    |
| Actual Endpoint    | Toxic                                    | Toxic                                   | Toxic                              |
| Predicted Endpoint | Toxic                                    | Toxic                                   | Toxic                              |
| Distance           | 0.610                                    | 0.624                                   | 0.635                              |
| Reference          | Toxicol Appl Pharmacol 37(2):331-8; 1976 | Arzneimittelforschung 23(4):504-8; 1973 | Yakuri to Chiryō 9:3551-3571; 1981 |

## Model Applicability

Unknown features are fingerprint features in the query molecule, but not found or appearing too infrequently in the training set.

1. All properties and OPS components are within expected ranges.

## Feature Contribution

### Top features for positive contribution

| Fingerprint | Bit/Smiles | Feature Structure                          | Score | Toxic in training set |
|-------------|------------|--------------------------------------------|-------|-----------------------|
| SCFP_6      | 2102703671 | <br>[*]C1=[*][c](:[*]):[c](NC1=O):[cH]:[*] | 0.271 | 1 out of 1            |

|                                               |                   |                                                                                                                                                  |              |                              |
|-----------------------------------------------|-------------------|--------------------------------------------------------------------------------------------------------------------------------------------------|--------------|------------------------------|
| SCFP_6                                        | 199205675         | 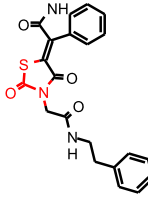<br><chem>[*]N1[*][*]SC1=O</chem>                             | 0.271        | 1 out of 1                   |
| SCFP_6                                        | -587539325        | <br><chem>[*]N([*])CC(=[*])[*]</chem>                         | 0.271        | 1 out of 1                   |
| <b>Top Features for negative contribution</b> |                   |                                                                                                                                                  |              |                              |
| <b>Fingerprint</b>                            | <b>Bit/Smiles</b> | <b>Feature Structure</b>                                                                                                                         | <b>Score</b> | <b>Toxic in training set</b> |
| SCFP_6                                        | 2005026407        | <br><chem>[*]CCNC(=O)C[*]</chem>                              | -0.718       | 0 out of 2                   |
| SCFP_6                                        | 399659969         | <br><chem>[*]CN1C(=[*])[*]C1=O</chem>                        | -0.526       | 3 out of 11                  |
| SCFP_6                                        | 1420330831        | <br><chem>[*]=C1[*]=C[c]2:[c]H:[*]:[c]H:[c]H:[c]:2N1</chem> | -0.422       | 0 out of 1                   |

# Sorafenib

# TOPKAT\_Developmental\_Toxicity\_Potential

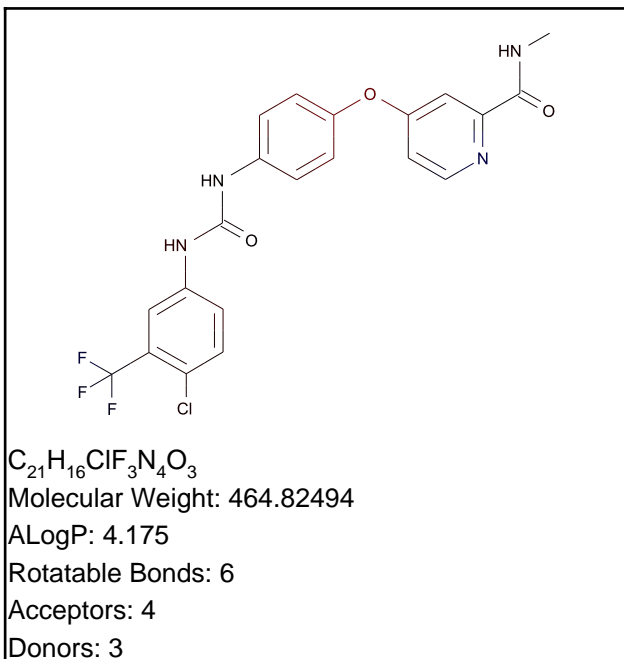

## Model Prediction

**Prediction: Toxic**

Probability: 0.592

Enrichment: 1.13

Bayesian Score: 1.15

Mahalanobis Distance: 12.6

Mahalanobis Distance p-value: 2.07e-006

Prediction: Positive if the Bayesian score is above the estimated best cutoff value from minimizing the false positive and false negative rate.

Probability: The estimated probability that the sample is in the positive category. This assumes that the Bayesian score follows a normal distribution and is different from the prediction using a cutoff.

Enrichment: An estimate of enrichment, that is, the increased likelihood (versus random) of this sample being in the category.

Bayesian Score: The standard Laplacian-modified Bayesian score.

Mahalanobis Distance: The Mahalanobis distance (MD) is the distance to the center of the training data. The larger the MD, the less trustworthy the prediction.

Mahalanobis Distance p-value: The p-value gives the fraction of training data with an MD greater than or equal to the one for the given sample, assuming normally distributed data. The smaller the p-value, the less trustworthy the prediction. For highly non-normal X properties (e.g., fingerprints), the MD p-value is wildly inaccurate.

## Structural Similar Compounds

| Name               | Chenodioli                                                                          | Amsacrine                                                                           | Ochratoxin a                                                                        |
|--------------------|-------------------------------------------------------------------------------------|-------------------------------------------------------------------------------------|-------------------------------------------------------------------------------------|
| Structure          | 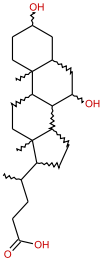 |  |  |
| Actual Endpoint    | Toxic                                                                               | Toxic                                                                               | Toxic                                                                               |
| Predicted Endpoint | Toxic                                                                               | Toxic                                                                               | Toxic                                                                               |
| Distance           | 0.631                                                                               | 0.637                                                                               | 0.644                                                                               |
| Reference          | Arch Int Pharm 246:149-158; 1980                                                    | Fundam Appl Toxicol 7(2):214-20; 1986                                               | Toxicol Appl Pharmacol 37(2):331-8; 1976                                            |

## Model Applicability

Unknown features are fingerprint features in the query molecule, but not found or appearing too infrequently in the training set.

1. All properties and OPS components are within expected ranges.

## Feature Contribution

### Top features for positive contribution

| Fingerprint | Bit/Smiles | Feature Structure                                                                                                                             | Score | Toxic in training set |
|-------------|------------|-----------------------------------------------------------------------------------------------------------------------------------------------|-------|-----------------------|
| SCFP_6      | 1559190850 | 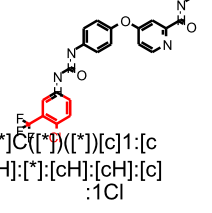<br>[*]C( [* ]) ( [* ]) [c]1:[c]H:[*]:[cH]:[cH]:[c]::1Cl | 0.441 | 3 out of 3            |

|                                               |                   |                                                                                                                                               |              |                              |
|-----------------------------------------------|-------------------|-----------------------------------------------------------------------------------------------------------------------------------------------|--------------|------------------------------|
| SCFP_6                                        | -488587948        | 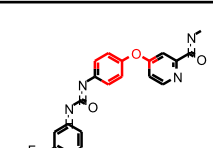<br>[*]:[c]([*])O[c]1:[cH]:[cH]:[*]:[cH]:[cH]:1             | 0.381        | 2 out of 2                   |
| SCFP_6                                        | -975241316        | <br>[*][c]1:[cH]:[cH]:[c](O[c](:[cH]:[*]):[cH]:[*]):[cH]:1 | 0.381        | 2 out of 2                   |
| <b>Top Features for negative contribution</b> |                   |                                                                                                                                               |              |                              |
| <b>Fingerprint</b>                            | <b>Bit/Smiles</b> | <b>Feature Structure</b>                                                                                                                      | <b>Score</b> | <b>Toxic in training set</b> |
| SCFP_6                                        | -1794974220       | <br>[*]C([*])([*])F                                        | -0.55        | 2 out of 8                   |
| SCFP_6                                        | -937094999        | <br>[*][c]1:[*]:[c]([*]):n:[cH]:[cH]:1                    | -0.358       | 3 out of 9                   |
| SCFP_6                                        | -496201075        | <br>[*]:[cH]:[cH]:n:[*]                                  | -0.289       | 8 out of 21                  |

# Sunitinib

# TOPKAT\_Developmental\_Toxicity\_Potential

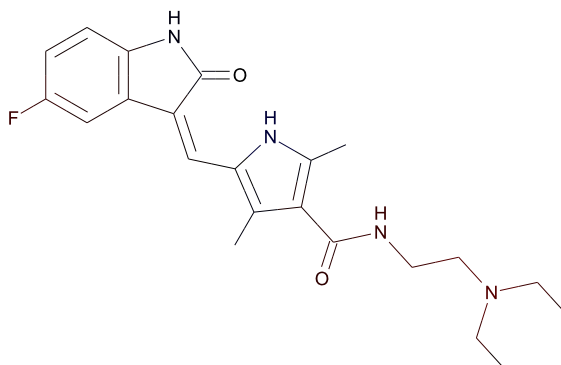

C<sub>22</sub>H<sub>27</sub>FN<sub>4</sub>O<sub>2</sub>

Molecular Weight: 398.47378

ALogP: 2.997

Rotatable Bonds: 7

Acceptors: 3

Donors: 3

## Model Prediction

**Prediction: Toxic**

Probability: 0.635

Enrichment: 1.21

Bayesian Score: 2.26

Mahalanobis Distance: 13.3

Mahalanobis Distance p-value: 1.35e-007

Prediction: Positive if the Bayesian score is above the estimated best cutoff value from minimizing the false positive and false negative rate.

Probability: The estimated probability that the sample is in the positive category. This assumes that the Bayesian score follows a normal distribution and is different from the prediction using a cutoff.

Enrichment: An estimate of enrichment, that is, the increased likelihood (versus random) of this sample being in the category.

Bayesian Score: The standard Laplacian-modified Bayesian score.

Mahalanobis Distance: The Mahalanobis distance (MD) is the distance to the center of the training data. The larger the MD, the less trustworthy the prediction.

Mahalanobis Distance p-value: The p-value gives the fraction of training data with an MD greater than or equal to the one for the given sample, assuming normally distributed data. The smaller the p-value, the less trustworthy the prediction. For highly non-normal X properties (e.g., fingerprints), the MD p-value is wildly inaccurate.

## Structural Similar Compounds

| Name               | Domperidone                                                                         | Clebopride Malate                                                                   | Dobutamine .HCl (Free base form)                                                    |
|--------------------|-------------------------------------------------------------------------------------|-------------------------------------------------------------------------------------|-------------------------------------------------------------------------------------|
| Structure          | 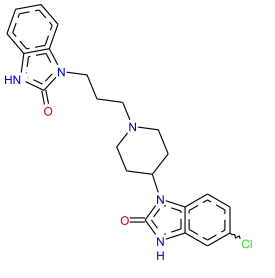 |  |  |
| Actual Endpoint    | Toxic                                                                               | Non-Toxic                                                                           | Toxic                                                                               |
| Predicted Endpoint | Toxic                                                                               | Non-Toxic                                                                           | Toxic                                                                               |
| Distance           | 0.619                                                                               | 0.627                                                                               | 0.678                                                                               |
| Reference          | Yakuri to Chiryo 8:4125-4136; 1980                                                  | Kiso to Rinsho 16:5649-5660; 1982                                                   | Yakuri to Chiryo 7:1707-1730; 1979                                                  |

## Model Applicability

Unknown features are fingerprint features in the query molecule, but not found or appearing too infrequently in the training set.

1. All properties and OPS components are within expected ranges.

## Feature Contribution

### Top features for positive contribution

| Fingerprint | Bit/Smiles | Feature Structure                                                                                                     | Score | Toxic in training set |
|-------------|------------|-----------------------------------------------------------------------------------------------------------------------|-------|-----------------------|
| SCFP_6      | 1971137145 | 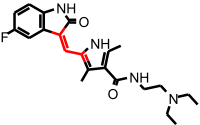<br>[*]C(=C[c](:[*]):[*])<br>[*] | 0.431 | 7 out of 8            |



| SCFP_6                                 | 1725890097 | 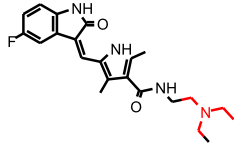<br>[*]CN(C[*])CC                                       | 0.381  | 2 out of 2            |
|----------------------------------------|------------|--------------------------------------------------------------------------------------------------------------------------------------------|--------|-----------------------|
| SCFP_6                                 | -182283812 | <br>[*]CN(C[*])CCN[*]                                   | 0.381  | 2 out of 2            |
| Top Features for negative contribution |            |                                                                                                                                            |        |                       |
| Fingerprint                            | Bit/Smiles | Feature Structure                                                                                                                          | Score  | Toxic in training set |
| SCFP_6                                 | 2109374332 | <br>[*][c]1:[*]:[*]:[nH]:<br>[c]:1C                     | -0.446 | 3 out of 10           |
| SCFP_6                                 | 1420330831 | <br>[*]=C1[*]=C[c]2:[cH]:<br>[*]:[cH]:[cH]:[c]:2N<br>1 | -0.422 | 0 out of 1            |
| SCFP_6                                 | 136686699  | <br>[*]:[c]:[*]C                                      | -0.316 | 7 out of 19           |

10a

TOPKAT\_Mouse\_Female\_FDA\_None\_vs\_Carcinogen

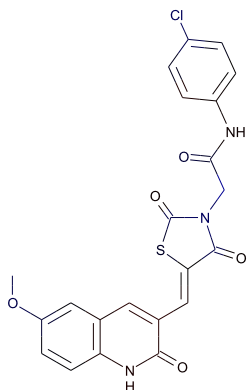C<sub>22</sub>H<sub>16</sub>ClN<sub>3</sub>O<sub>5</sub>S

Molecular Weight: 469.89753

ALogP: 2.815

Rotatable Bonds: 5

Acceptors: 6

Donors: 2

## Model Prediction

Prediction: Non-Carcinogen

Probability: 0.206

Enrichment: 0.642

Bayesian Score: -5.47

Mahalanobis Distance: 14

Mahalanobis Distance p-value: 1.65e-005

Prediction: Positive if the Bayesian score is above the estimated best cutoff value from minimizing the false positive and false negative rate.

Probability: The estimated probability that the sample is in the positive category. This assumes that the Bayesian score follows a normal distribution and is different from the prediction using a cutoff.

Enrichment: An estimate of enrichment, that is, the increased likelihood (versus random) of this sample being in the category. Bayesian Score: The standard Laplacian-modified Bayesian score.

Mahalanobis Distance: The Mahalanobis distance (MD) is the distance to the center of the training data. The larger the MD, the less trustworthy the prediction.

Mahalanobis Distance p-value: The p-value gives the fraction of training data with an MD greater than or equal to the one for the given sample, assuming normally distributed data. The smaller the p-value, the less trustworthy the prediction. For highly non-normal X properties (e.g., fingerprints), the MD p-value is wildly inaccurate.

## Structural Similar Compounds

| Name               | Bicalutamide                                                        | Moricizine                                                          | Glipizide                                                           |
|--------------------|---------------------------------------------------------------------|---------------------------------------------------------------------|---------------------------------------------------------------------|
| Structure          |                                                                     |                                                                     |                                                                     |
| Actual Endpoint    | Non-Carcinogen                                                      | Carcinogen                                                          | Non-Carcinogen                                                      |
| Predicted Endpoint | Non-Carcinogen                                                      | Carcinogen                                                          | Non-Carcinogen                                                      |
| Distance           | 0.579                                                               | 0.638                                                               | 0.679                                                               |
| Reference          | US FDA (Centre for Drug Eval.& Res./Off. Testing & Res.) Sept. 1997 | US FDA (Centre for Drug Eval.& Res./Off. Testing & Res.) Sept. 1997 | US FDA (Centre for Drug Eval.& Res./Off. Testing & Res.) Sept. 1997 |

## Model Applicability

Unknown features are fingerprint features in the query molecule, but not found or appearing too infrequently in the training set.

1. All properties and OPS components are within expected ranges.
2. Unknown ECFP\_2 feature: 2131425032: [\*]\C=C(\C=[\*])/C(=[\*])[\*]
3. Unknown ECFP\_2 feature: 1182722866: [\*]C(=CC(=[\*])[\*])[\*]
4. Unknown ECFP\_2 feature: 1000552169: [\*]\C=C\1/S[\*][\*]C1=[\*]
5. Unknown ECFP\_2 feature: 190445529: [\*]N1[\*][\*]SC1=O

## Feature Contribution

### Top features for positive contribution

| Fingerprint | Bit/Smiles | Feature Structure                                 | Score | Carcinogen in training set |
|-------------|------------|---------------------------------------------------|-------|----------------------------|
| ECFP_6      | 738938915  | <br>[*]C(=[*])N[c]1:[cH]:<br>[cH]:[*]:[cH]:[cH]:1 | 0.617 | 2 out of 2                 |

|                                               |                   |                                                                                                                                               |              |                                   |
|-----------------------------------------------|-------------------|-----------------------------------------------------------------------------------------------------------------------------------------------|--------------|-----------------------------------|
| ECFP_6                                        | 464808839         | 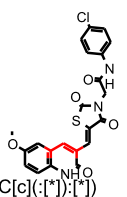<br><chem>[*]C(=C[c](:[*]):[*])</chem><br><chem>[*]</chem> | 0.524        | 8 out of 14                       |
| ECFP_6                                        | -1925046727       | <br><chem>[*]C=[*]</chem>                                  | 0.391        | 11 out of 23                      |
| <b>Top Features for negative contribution</b> |                   |                                                                                                                                               |              |                                   |
| <b>Fingerprint</b>                            | <b>Bit/Smiles</b> | <b>Feature Structure</b>                                                                                                                      | <b>Score</b> | <b>Carcinogen in training set</b> |
| ECFP_6                                        | -661097313        | <br><chem>[*]CN1C(=[*])[*]C1</chem><br><chem>=[*]</chem>   | -1.55        | 0 out of 12                       |
| ECFP_6                                        | 1731843802        | <br><chem>[*]CC(=O)N[*]</chem>                            | -0.657       | 0 out of 3                        |
| ECFP_6                                        | 912478223         | <br><chem>[*]S[*]</chem>                                 | -0.638       | 1 out of 9                        |

10b

## TOPKAT\_Mouse\_Female\_FDA\_None\_vs\_Carcinogen

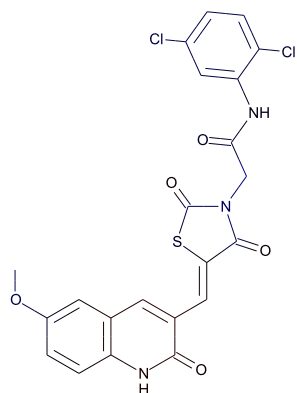
 $C_{22}H_{15}Cl_2N_3O_5S$ 

Molecular Weight: 504.3426

ALogP: 3.479

Rotatable Bonds: 5

Acceptors: 6

Donors: 2

**Model Prediction**

Prediction: Non-Carcinogen

Probability: 0.205

Enrichment: 0.64

Bayesian Score: -6.8

Mahalanobis Distance: 13.6

Mahalanobis Distance p-value: 7.54e-005

Prediction: Positive if the Bayesian score is above the estimated best cutoff value from minimizing the false positive and false negative rate.

Probability: The estimated probability that the sample is in the positive category. This assumes that the Bayesian score follows a normal distribution and is different from the prediction using a cutoff.

Enrichment: An estimate of enrichment, that is, the increased likelihood (versus random) of this sample being in the category. Bayesian Score: The standard Laplacian-modified Bayesian score.

Mahalanobis Distance: The Mahalanobis distance (MD) is the distance to the center of the training data. The larger the MD, the less trustworthy the prediction.

Mahalanobis Distance p-value: The p-value gives the fraction of training data with an MD greater than or equal to the one for the given sample, assuming normally distributed data. The smaller the p-value, the less trustworthy the prediction. For highly non-normal X properties (e.g., fingerprints), the MD p-value is wildly inaccurate.

**Structural Similar Compounds**

| Name               | Bicalutamide                                                        | Fluticasone                                                         | Glimepiride                                                         |
|--------------------|---------------------------------------------------------------------|---------------------------------------------------------------------|---------------------------------------------------------------------|
| Structure          |                                                                     |                                                                     |                                                                     |
| Actual Endpoint    | Non-Carcinogen                                                      | Non-Carcinogen                                                      | Carcinogen                                                          |
| Predicted Endpoint | Non-Carcinogen                                                      | Non-Carcinogen                                                      | Carcinogen                                                          |
| Distance           | 0.634                                                               | 0.657                                                               | 0.671                                                               |
| Reference          | US FDA (Centre for Drug Eval.& Res./Off. Testing & Res.) Sept. 1997 | US FDA (Centre for Drug Eval.& Res./Off. Testing & Res.) Sept. 1997 | US FDA (Centre for Drug Eval.& Res./Off. Testing & Res.) Sept. 1997 |

**Model Applicability**

Unknown features are fingerprint features in the query molecule, but not found or appearing too infrequently in the training set.

1. All properties and OPS components are within expected ranges.
2. Unknown ECFP\_2 feature: 2131425032: [\*]\C=C(\C=[\*])/C(=[\*])[\*]
3. Unknown ECFP\_2 feature: 1182722866: [\*]C(=CC(=[\*])[\*])[\*]
4. Unknown ECFP\_2 feature: 1000552169: [\*]\C=C\1/S[\*][\*]C1=[\*]
5. Unknown ECFP\_2 feature: 190445529: [\*]N1[\*][\*]SC1=O

**Feature Contribution****Top features for positive contribution**

| Fingerprint | Bit/Smiles | Feature Structure                | Score | Carcinogen in training set |
|-------------|------------|----------------------------------|-------|----------------------------|
| ECFP_6      | 464808839  | <br>[*]C(=C[c](:[*]):[*])<br>[*] | 0.524 | 8 out of 14                |

| ECFP_6                                 | -1925046727 | 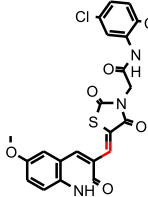<br>[*]C=[*]                           | 0.391  | 11 out of 23               |
|----------------------------------------|-------------|---------------------------------------------------------------------------------------------------------------------------|--------|----------------------------|
| ECFP_6                                 | -1699286547 | <br>[*]C(=[*])N[c](:[*]):<br>[*]       | 0.297  | 12 out of 28               |
| Top Features for negative contribution |             |                                                                                                                           |        |                            |
| Fingerprint                            | Bit/Smiles  | Feature Structure                                                                                                         | Score  | Carcinogen in training set |
| ECFP_6                                 | -661097313  | <br>[*]CN1C(=[*])[*]C1<br>=[*]         | -1.55  | 0 out of 12                |
| ECFP_6                                 | 1335691903  | <br>[*][c](:[*]):[c](Cl):<br>[cH]:[*] | -0.669 | 3 out of 22                |
| ECFP_6                                 | 1731843802  | <br>[*]CC(=O)N[*]                    | -0.657 | 0 out of 3                 |

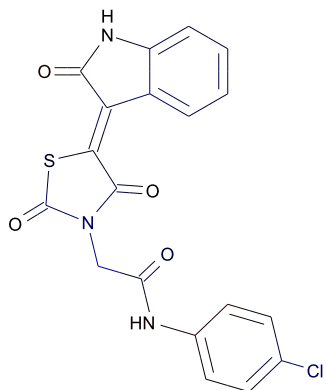

$C_{19}H_{12}ClN_3O_4S$

Molecular Weight: 413.83428

ALogP: 2.363

Rotatable Bonds: 3

Acceptors: 5

Donors: 2

## Model Prediction

Prediction: Non-Carcinogen

Probability: 0.205

Enrichment: 0.639

Bayesian Score: -6.61

Mahalanobis Distance: 12.7

Mahalanobis Distance p-value: 0.00132

Prediction: Positive if the Bayesian score is above the estimated best cutoff value from minimizing the false positive and false negative rate.

Probability: The estimated probability that the sample is in the positive category. This assumes that the Bayesian score follows a normal distribution and is different from the prediction using a cutoff.

Enrichment: An estimate of enrichment, that is, the increased likelihood (versus random) of this sample being in the category.

Bayesian Score: The standard Laplacian-modified Bayesian score.

Mahalanobis Distance: The Mahalanobis distance (MD) is the distance to the center of the training data. The larger the MD, the less trustworthy the prediction.

Mahalanobis Distance p-value: The p-value gives the fraction of training data with an MD greater than or equal to the one for the given sample, assuming normally distributed data. The smaller the p-value, the less trustworthy the prediction. For highly non-normal X properties (e.g., fingerprints), the MD p-value is wildly inaccurate.

## Structural Similar Compounds

| Name               | Indapamide                                                          | Metolazone                                                          | Acetohexamide                                                       |
|--------------------|---------------------------------------------------------------------|---------------------------------------------------------------------|---------------------------------------------------------------------|
| Structure          |                                                                     |                                                                     |                                                                     |
| Actual Endpoint    | Non-Carcinogen                                                      | Non-Carcinogen                                                      | Non-Carcinogen                                                      |
| Predicted Endpoint | Non-Carcinogen                                                      | Non-Carcinogen                                                      | Non-Carcinogen                                                      |
| Distance           | 0.578                                                               | 0.580                                                               | 0.647                                                               |
| Reference          | US FDA (Centre for Drug Eval.& Res./Off. Testing & Res.) Sept. 1997 | US FDA (Centre for Drug Eval.& Res./Off. Testing & Res.) Sept. 1997 | US FDA (Centre for Drug Eval.& Res./Off. Testing & Res.) Sept. 1997 |

## Model Applicability

Unknown features are fingerprint features in the query molecule, but not found or appearing too infrequently in the training set.

1. All properties and OPS components are within expected ranges.
2. Unknown ECFP\_2 feature: -631778390: [\*]C(=C1S[\*][\*]C1=[\*])[\*]
3. Unknown ECFP\_2 feature: 190445529: [\*]N1[\*][\*]SC1=O

## Feature Contribution

### Top features for positive contribution

| Fingerprint | Bit/Smiles | Feature Structure                                 | Score | Carcinogen in training set |
|-------------|------------|---------------------------------------------------|-------|----------------------------|
| ECFP_6      | 738938915  | <br>[*]C(=[*])N[c]1:[cH]:<br>[cH]:[*]:[cH]:[cH]:1 | 0.617 | 2 out of 2                 |

|                                               |                   |                                                                                                                                               |              |                                   |
|-----------------------------------------------|-------------------|-----------------------------------------------------------------------------------------------------------------------------------------------|--------------|-----------------------------------|
| ECFP_6                                        | -1699286547       | 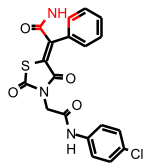<br><chem>[*]C(=[*])N(c(:[*])):</chem><br><chem>[*]</chem> | 0.297        | 12 out of 28                      |
| ECFP_6                                        | 1298725959        | <br><chem>[*]NC(=O)C(=[*])[*]</chem>                       | 0.279        | 4 out of 9                        |
| <b>Top Features for negative contribution</b> |                   |                                                                                                                                               |              |                                   |
| <b>Fingerprint</b>                            | <b>Bit/Smiles</b> | <b>Feature Structure</b>                                                                                                                      | <b>Score</b> | <b>Carcinogen in training set</b> |
| ECFP_6                                        | -661097313        | <br><chem>[*]CN1C(=[*])[*]C1=</chem><br><chem>[*]</chem>   | -1.55        | 0 out of 12                       |
| ECFP_6                                        | 1731843802        | <br><chem>[*]CC(=O)N[*]</chem>                            | -0.657       | 0 out of 3                        |
| ECFP_6                                        | 912478223         | <br><chem>[*]S[*]</chem>                                 | -0.638       | 1 out of 9                        |

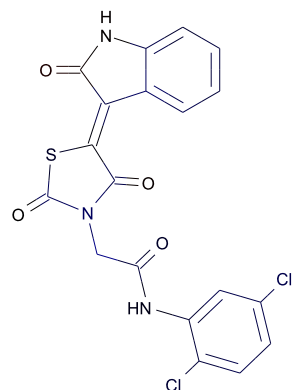

$C_{19}H_{11}Cl_2N_3O_4S$

Molecular Weight: 448.27933

ALogP: 3.028

Rotatable Bonds: 3

Acceptors: 5

Donors: 2

## Model Prediction

Prediction: Non-Carcinogen

Probability: 0.207

Enrichment: 0.646

Bayesian Score: -7.61

Mahalanobis Distance: 11.3

Mahalanobis Distance p-value: 0.0557

Prediction: Positive if the Bayesian score is above the estimated best cutoff value from minimizing the false positive and false negative rate.

Probability: The estimated probability that the sample is in the positive category. This assumes that the Bayesian score follows a normal distribution and is different from the prediction using a cutoff.

Enrichment: An estimate of enrichment, that is, the increased likelihood (versus random) of this sample being in the category.

Bayesian Score: The standard Laplacian-modified Bayesian score.

Mahalanobis Distance: The Mahalanobis distance (MD) is the distance to the center of the training data. The larger the MD, the less trustworthy the prediction.

Mahalanobis Distance p-value: The p-value gives the fraction of training data with an MD greater than or equal to the one for the given sample, assuming normally distributed data. The smaller the p-value, the less trustworthy the prediction. For highly non-normal X properties (e.g., fingerprints), the MD p-value is wildly inaccurate.

## Structural Similar Compounds

| Name               | Indapamide                                                          | Metolazone                                                          | Bicalutamide                                                        |
|--------------------|---------------------------------------------------------------------|---------------------------------------------------------------------|---------------------------------------------------------------------|
| Structure          |                                                                     |                                                                     |                                                                     |
| Actual Endpoint    | Non-Carcinogen                                                      | Non-Carcinogen                                                      | Non-Carcinogen                                                      |
| Predicted Endpoint | Non-Carcinogen                                                      | Non-Carcinogen                                                      | Non-Carcinogen                                                      |
| Distance           | 0.609                                                               | 0.619                                                               | 0.652                                                               |
| Reference          | US FDA (Centre for Drug Eval.& Res./Off. Testing & Res.) Sept. 1997 | US FDA (Centre for Drug Eval.& Res./Off. Testing & Res.) Sept. 1997 | US FDA (Centre for Drug Eval.& Res./Off. Testing & Res.) Sept. 1997 |

## Model Applicability

Unknown features are fingerprint features in the query molecule, but not found or appearing too infrequently in the training set.

1. All properties and OPS components are within expected ranges.
2. Unknown ECFP\_2 feature: -631778390: [\*]C(=C1S[\*][\*]C1=[\*])[\*]
3. Unknown ECFP\_2 feature: 190445529: [\*]N1[\*][\*]SC1=O

## Feature Contribution

### Top features for positive contribution

| Fingerprint | Bit/Smiles  | Feature Structure                | Score | Carcinogen in training set |
|-------------|-------------|----------------------------------|-------|----------------------------|
| ECFP_6      | -1699286547 | <br>[*]C(=[*])N[c](:[*]):<br>[*] | 0.297 | 12 out of 28               |



|                                               |                   |                                                                                                                                        |              |                                   |
|-----------------------------------------------|-------------------|----------------------------------------------------------------------------------------------------------------------------------------|--------------|-----------------------------------|
| ECFP_6                                        | 1298725959        | 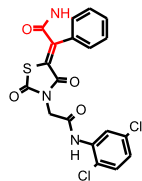<br><chem>[*]NC(=O)C(=[*])[*]</chem>                | 0.279        | 4 out of 9                        |
| ECFP_6                                        | 2106656448        | <br><chem>[*]C(=O)[*]</chem>                        | 0.254        | 31 out of 77                      |
| <b>Top Features for negative contribution</b> |                   |                                                                                                                                        |              |                                   |
| <b>Fingerprint</b>                            | <b>Bit/Smiles</b> | <b>Feature Structure</b>                                                                                                               | <b>Score</b> | <b>Carcinogen in training set</b> |
| ECFP_6                                        | -661097313        | <br><chem>[*]CN1C(=[*])[*][*]C1=[*]</chem>          | -1.55        | 0 out of 12                       |
| ECFP_6                                        | 1335691903        | <br><chem>[*][c](:[*]):[*]:[c](Cl):[cH]:[*]</chem> | -0.669       | 3 out of 22                       |
| ECFP_6                                        | 1731843802        | <br><chem>[*]CC(=O)N[*]</chem>                    | -0.657       | 0 out of 3                        |

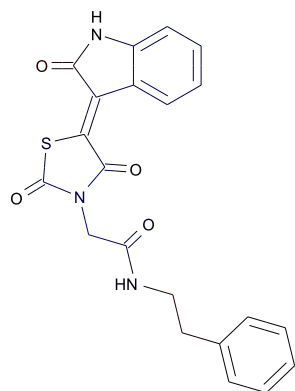

$C_{21}H_{17}N_3O_4S$

Molecular Weight: 407.44237

ALogP: 2.027

Rotatable Bonds: 5

Acceptors: 5

Donors: 2

## Model Prediction

Prediction: Non-Carcinogen

Probability: 0.207

Enrichment: 0.646

Bayesian Score: -5.01

Mahalanobis Distance: 12

Mahalanobis Distance p-value: 0.0122

Prediction: Positive if the Bayesian score is above the estimated best cutoff value from minimizing the false positive and false negative rate.

Probability: The estimated probability that the sample is in the positive category. This assumes that the Bayesian score follows a normal distribution and is different from the prediction using a cutoff.

Enrichment: An estimate of enrichment, that is, the increased likelihood (versus random) of this sample being in the category.

Bayesian Score: The standard Laplacian-modified Bayesian score.

Mahalanobis Distance: The Mahalanobis distance (MD) is the distance to the center of the training data. The larger the MD, the less trustworthy the prediction.

Mahalanobis Distance p-value: The p-value gives the fraction of training data with an MD greater than or equal to the one for the given sample, assuming normally distributed data. The smaller the p-value, the less trustworthy the prediction. For highly non-normal X properties (e.g., fingerprints), the MD p-value is wildly inaccurate.

## Structural Similar Compounds

| Name               | Bicalutamide                                                        | Acetohexamide                                                       | Penicillin                                                          |
|--------------------|---------------------------------------------------------------------|---------------------------------------------------------------------|---------------------------------------------------------------------|
| Structure          |                                                                     |                                                                     |                                                                     |
| Actual Endpoint    | Non-Carcinogen                                                      | Non-Carcinogen                                                      | Non-Carcinogen                                                      |
| Predicted Endpoint | Non-Carcinogen                                                      | Non-Carcinogen                                                      | Non-Carcinogen                                                      |
| Distance           | 0.587                                                               | 0.589                                                               | 0.604                                                               |
| Reference          | US FDA (Centre for Drug Eval.& Res./Off. Testing & Res.) Sept. 1997 | US FDA (Centre for Drug Eval.& Res./Off. Testing & Res.) Sept. 1997 | US FDA (Centre for Drug Eval.& Res./Off. Testing & Res.) Sept. 1997 |

## Model Applicability

Unknown features are fingerprint features in the query molecule, but not found or appearing too infrequently in the training set.

1. All properties and OPS components are within expected ranges.
2. Unknown ECFP\_2 feature: -631778390: [\*]C(=C1S[\*][\*]C1=[\*])[\*]
3. Unknown ECFP\_2 feature: 190445529: [\*]N1[\*][\*]SC1=O

## Feature Contribution

### Top features for positive contribution

| Fingerprint | Bit/Smiles  | Feature Structure             | Score | Carcinogen in training set |
|-------------|-------------|-------------------------------|-------|----------------------------|
| ECFP_6      | -1699286547 | <br>[*]C(=[*])N(c):[*]<br>[*] | 0.297 | 12 out of 28               |

|                                               |                   |                                                                                                                               |              |                                   |
|-----------------------------------------------|-------------------|-------------------------------------------------------------------------------------------------------------------------------|--------------|-----------------------------------|
| ECFP_6                                        | -1791034651       | 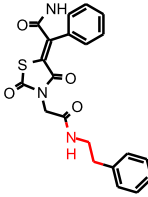<br><chem>[*]CCN[*]</chem>                 | 0.296        | 7 out of 16                       |
| ECFP_6                                        | 1298725959        | <br><chem>[*]NC(=O)C(=[*])[*]</chem>       | 0.279        | 4 out of 9                        |
| <b>Top Features for negative contribution</b> |                   |                                                                                                                               |              |                                   |
| <b>Fingerprint</b>                            | <b>Bit/Smiles</b> | <b>Feature Structure</b>                                                                                                      | <b>Score</b> | <b>Carcinogen in training set</b> |
| ECFP_6                                        | -661097313        | <br><chem>[*]CN1C(=[*])[*][*]C1=[*]</chem> | -1.55        | 0 out of 12                       |
| ECFP_6                                        | 1731843802        | <br><chem>[*]CC(=O)N[*]</chem>            | -0.657       | 0 out of 3                        |
| ECFP_6                                        | 912478223         | <br><chem>[*]S[*]</chem>                 | -0.638       | 1 out of 9                        |

# Sorafenib

# TOPKAT\_Mouse\_Female\_FDA\_None\_vs\_Carcinogen

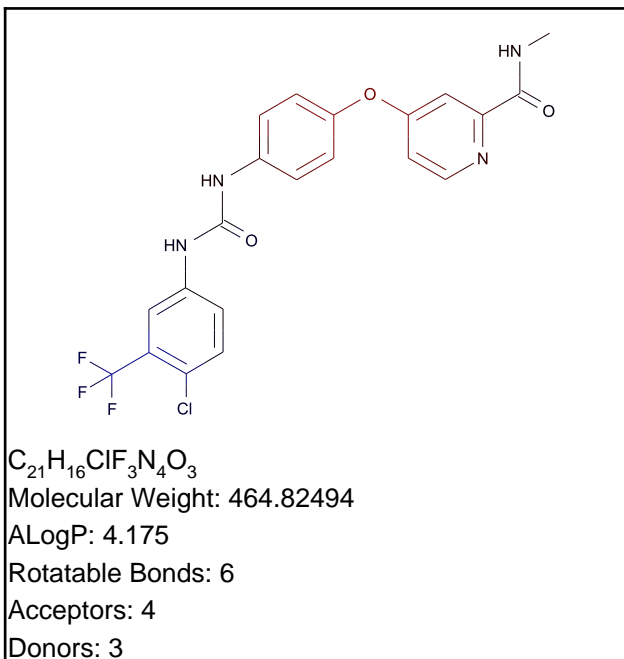

## Model Prediction

Prediction: **Carcinogen**

Probability: 0.257

Enrichment: 0.801

Bayesian Score: -0.321

Mahalanobis Distance: 14.9

Mahalanobis Distance p-value: 4.21e-007

Prediction: Positive if the Bayesian score is above the estimated best cutoff value from minimizing the false positive and false negative rate.

Probability: The estimated probability that the sample is in the positive category. This assumes that the Bayesian score follows a normal distribution and is different from the prediction using a cutoff.

Enrichment: An estimate of enrichment, that is, the increased likelihood (versus random) of this sample being in the category.

Bayesian Score: The standard Laplacian-modified Bayesian score.

Mahalanobis Distance: The Mahalanobis distance (MD) is the distance to the center of the training data. The larger the MD, the less trustworthy the prediction.

Mahalanobis Distance p-value: The p-value gives the fraction of training data with an MD greater than or equal to the one for the given sample, assuming normally distributed data. The smaller the p-value, the less trustworthy the prediction. For highly non-normal X properties (e.g., fingerprints), the MD p-value is wildly inaccurate.

## Structural Similar Compounds

| Name               | Glimepiride                                                                         | Glyburide                                                                           | Fluvastatin                                                                         |
|--------------------|-------------------------------------------------------------------------------------|-------------------------------------------------------------------------------------|-------------------------------------------------------------------------------------|
| Structure          | 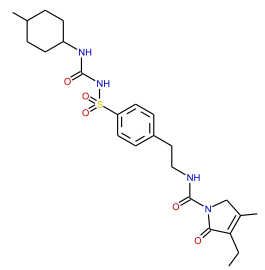 |  |  |
| Actual Endpoint    | Carcinogen                                                                          | Non-Carcinogen                                                                      | Non-Carcinogen                                                                      |
| Predicted Endpoint | Carcinogen                                                                          | Non-Carcinogen                                                                      | Non-Carcinogen                                                                      |
| Distance           | 0.605                                                                               | 0.615                                                                               | 0.625                                                                               |
| Reference          | US FDA (Centre for Drug Eval.& Res./Off. Testing & Res.) Sept. 1997                 | US FDA (Centre for Drug Eval.& Res./Off. Testing & Res.) Sept. 1997                 | US FDA (Centre for Drug Eval.& Res./Off. Testing & Res.) Sept. 1997                 |

## Model Applicability

Unknown features are fingerprint features in the query molecule, but not found or appearing too infrequently in the training set.

- OPS PC20 out of range. Value: -3.3309. Training min, max, SD, explained variance: -3.1862, 4.4571, 1.28, 0.0167.

## Feature Contribution

### Top features for positive contribution

| Fingerprint | Bit/Smiles | Feature Structure                                                                                                                               | Score | Carcinogen in training set |
|-------------|------------|-------------------------------------------------------------------------------------------------------------------------------------------------|-------|----------------------------|
| ECFP_6      | 738938915  | 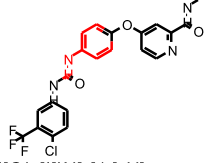<br><chem>[*]C(=[*])N[c]1:[cH]:[cH]:[*]:[cH]:[cH]:1</chem> | 0.617 | 2 out of 2                 |

|                                               |                   |                                                                                                                                                   |              |                                   |
|-----------------------------------------------|-------------------|---------------------------------------------------------------------------------------------------------------------------------------------------|--------------|-----------------------------------|
| ECFP_6                                        | 1338334141        | 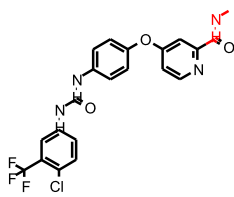<br><chem>[*]C(=[*])NC</chem>                                   | 0.442        | 2 out of 3                        |
| ECFP_6                                        | -834094296        | <br><chem>[*]:[cH]:[c](O[c]:[cH]:[*]):[cH]:[*]:[cH]:[*]</chem> | 0.424        | 1 out of 1                        |
| <b>Top Features for negative contribution</b> |                   |                                                                                                                                                   |              |                                   |
| <b>Fingerprint</b>                            | <b>Bit/Smiles</b> | <b>Feature Structure</b>                                                                                                                          | <b>Score</b> | <b>Carcinogen in training set</b> |
| ECFP_6                                        | 1335691903        | <br><chem>[*][c](:[*]):[c](Cl):[cH]:[*]</chem>                 | -0.669       | 3 out of 22                       |
| ECFP_6                                        | 1336678434        | <br><chem>[*][c](:[*]):[c](:[cH]:[*])C([*])([*])[*]</chem>    | -0.657       | 0 out of 3                        |
| ECFP_6                                        | -1952889961       | <br><chem>[*]:[c](:[*])C(F)(F)F</chem>                       | -0.657       | 0 out of 3                        |

# Sunitinib

# TOPKAT\_Mouse\_Female\_FDA\_None\_vs\_Carcinogen

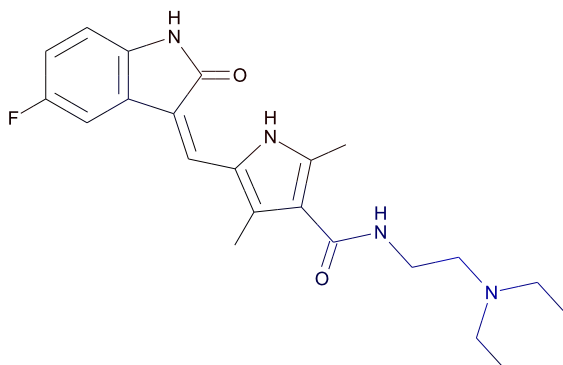

$C_{22}H_{27}FN_4O_2$

Molecular Weight: 398.47378

ALogP: 2.997

Rotatable Bonds: 7

Acceptors: 3

Donors: 3

## Model Prediction

Prediction: Non-Carcinogen

Probability: 0.218

Enrichment: 0.679

Bayesian Score: -3.25

Mahalanobis Distance: 13.8

Mahalanobis Distance p-value: 3.24e-005

Prediction: Positive if the Bayesian score is above the estimated best cutoff value from minimizing the false positive and false negative rate.

Probability: The estimated probability that the sample is in the positive category. This assumes that the Bayesian score follows a normal distribution and is different from the prediction using a cutoff.

Enrichment: An estimate of enrichment, that is, the increased likelihood (versus random) of this sample being in the category.

Bayesian Score: The standard Laplacian-modified Bayesian score.

Mahalanobis Distance: The Mahalanobis distance (MD) is the distance to the center of the training data. The larger the MD, the less trustworthy the prediction.

Mahalanobis Distance p-value: The p-value gives the fraction of training data with an MD greater than or equal to the one for the given sample, assuming normally distributed data. The smaller the p-value, the less trustworthy the prediction. For highly non-normal X properties (e.g., fingerprints), the MD p-value is wildly inaccurate.

## Structural Similar Compounds

| Name               | Fluvastatin                                                                         | Metoclopramide                                                                      | Flecainide                                                                          |
|--------------------|-------------------------------------------------------------------------------------|-------------------------------------------------------------------------------------|-------------------------------------------------------------------------------------|
| Structure          | 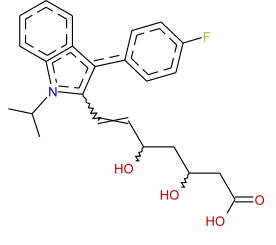 |  |  |
| Actual Endpoint    | Non-Carcinogen                                                                      | Non-Carcinogen                                                                      | Non-Carcinogen                                                                      |
| Predicted Endpoint | Non-Carcinogen                                                                      | Non-Carcinogen                                                                      | Non-Carcinogen                                                                      |
| Distance           | 0.610                                                                               | 0.643                                                                               | 0.666                                                                               |
| Reference          | US FDA (Centre for Drug Eval.& Res./Off. Testing & Res.) Sept. 1997                 | US FDA (Centre for Drug Eval.& Res./Off. Testing & Res.) Sept. 1997                 | US FDA (Centre for Drug Eval.& Res./Off. Testing & Res.) Sept. 1997                 |

## Model Applicability

Unknown features are fingerprint features in the query molecule, but not found or appearing too infrequently in the training set.

1. All properties and OPS components are within expected ranges.
2. Unknown ECFP\_2 feature: -1658273810: [\*]C(=[\*])[c]1:[c]([\*]):[\*]:[\*]:[c]:1[\*]
3. Unknown ECFP\_2 feature: 980271847: [\*][c]1:[\*]:[\*]:[nH]:[c]:1C=[\*]
4. Unknown ECFP\_2 feature: 1182722866: [\*]C(=CC(=[\*])[\*])[\*]

## Feature Contribution

### Top features for positive contribution

| Fingerprint | Bit/Smiles | Feature Structure                                                                                                        | Score | Carcinogen in training set |
|-------------|------------|--------------------------------------------------------------------------------------------------------------------------|-------|----------------------------|
| ECFP_6      | 1791989338 | 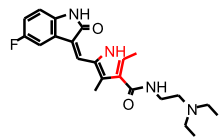<br>[*][c]1:[*]:[*]:[nH]:<br>[c]:1C | 0.424 | 1 out of 1                 |

|                                               |                   |                                                                                                                                               |              |                                   |
|-----------------------------------------------|-------------------|-----------------------------------------------------------------------------------------------------------------------------------------------|--------------|-----------------------------------|
| ECFP_6                                        | -1925046727       | 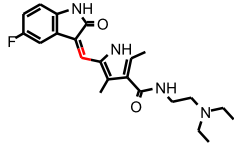<br><chem>[*]C=[*]</chem>                                  | 0.391        | 11 out of 23                      |
| ECFP_6                                        | -1699286547       | <br><chem>[*]C(=[*])N[c](:[*]):</chem><br><chem>[*]</chem> | 0.297        | 12 out of 28                      |
| <b>Top Features for negative contribution</b> |                   |                                                                                                                                               |              |                                   |
| <b>Fingerprint</b>                            | <b>Bit/Smiles</b> | <b>Feature Structure</b>                                                                                                                      | <b>Score</b> | <b>Carcinogen in training set</b> |
| ECFP_6                                        | 1795893449        | <br><chem>[*]CCNC(=O)[c](:[*]):</chem><br><chem>[*]</chem> | -0.657       | 0 out of 3                        |
| ECFP_6                                        | -628327667        | <br><chem>[*]CCN(CC)CC</chem>                             | -0.657       | 0 out of 3                        |
| ECFP_6                                        | -659402940        | <br><chem>[*]CN(C[*])CC</chem>                           | -0.657       | 0 out of 3                        |

# Sorafenib

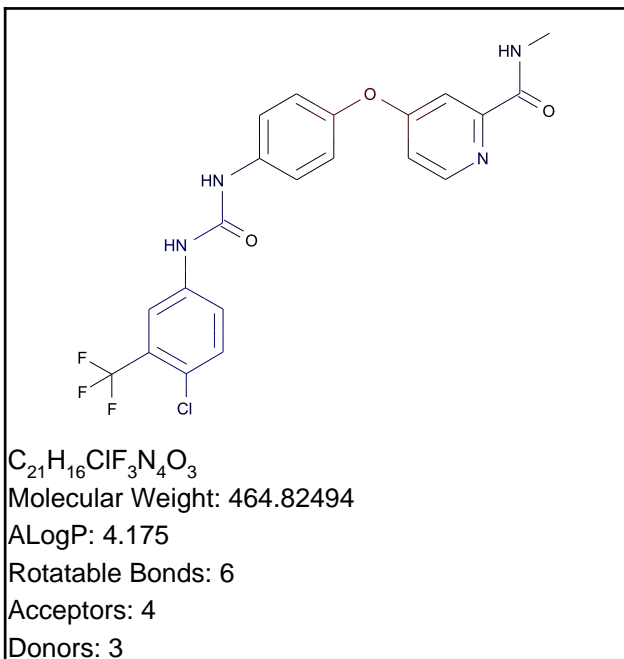

## Model Prediction

Prediction: Single-Carcinogen

Probability: 0.283

Enrichment: 0.691

Bayesian Score: -3.89

Mahalanobis Distance: 11.1

Mahalanobis Distance p-value: 0.00221

Prediction: Positive if the Bayesian score is above the estimated best cutoff value from minimizing the false positive and false negative rate.

Probability: The estimated probability that the sample is in the positive category. This assumes that the Bayesian score follows a normal distribution and is different from the prediction using a cutoff.

Enrichment: An estimate of enrichment, that is, the increased likelihood (versus random) of this sample being in the category.

Bayesian Score: The standard Laplacian-modified Bayesian score.

Mahalanobis Distance: The Mahalanobis distance (MD) is the distance to the center of the training data. The larger the MD, the less trustworthy the prediction.

Mahalanobis Distance p-value: The p-value gives the fraction of training data with an MD greater than or equal to the one for the given sample, assuming normally distributed data. The smaller the p-value, the less trustworthy the prediction. For highly non-normal X properties (e.g., fingerprints), the MD p-value is wildly inaccurate.

# TOPKAT\_Mouse\_Female\_FDA\_Single\_vs\_Multiple

## Structural Similar Compounds

| Name               | Glimepiride                                                                         | Labetalol                                                                           | Lansoprazole                                                                        |
|--------------------|-------------------------------------------------------------------------------------|-------------------------------------------------------------------------------------|-------------------------------------------------------------------------------------|
| Structure          | 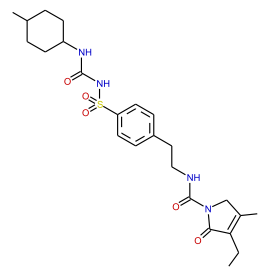 |  |  |
| Actual Endpoint    | Single-Carcinogen                                                                   | Single-Carcinogen                                                                   | Single-Carcinogen                                                                   |
| Predicted Endpoint | Single-Carcinogen                                                                   | Single-Carcinogen                                                                   | Single-Carcinogen                                                                   |
| Distance           | 0.599                                                                               | 0.808                                                                               | 0.820                                                                               |
| Reference          | US FDA (Centre for Drug Eval.& Res./Off. Testing & Res.) Sept. 1997                 | US FDA (Centre for Drug Eval.& Res./Off. Testing & Res.) Sept. 1997                 | US FDA (Centre for Drug Eval.& Res./Off. Testing & Res.) Sept. 1997                 |

## Model Applicability

Unknown features are fingerprint features in the query molecule, but not found or appearing too infrequently in the training set.

1. All properties and OPS components are within expected ranges.
2. Unknown ECFP\_2 feature: 1336678434: [\*][c](:[\*]):[c](C([\*])([\*])([\*])):c:[\*]
3. Unknown ECFP\_2 feature: -1952889961: [\*]:[c](:[\*])C(F)(F)F

## Feature Contribution

### Top features for positive contribution

| Fingerprint | Bit/Smiles | Feature Structure                                                                                                                | Score | Multiple-Carcinogen in training set |
|-------------|------------|----------------------------------------------------------------------------------------------------------------------------------|-------|-------------------------------------|
| ECFP_4      | -834094296 | 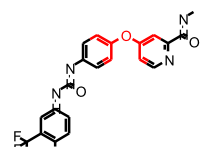<br>[*]:[cH]:[c](O[c](:[c]H):[*]):[c]H):[*] | 0.351 | 1 out of 1                          |



|                                               |                   |                                                                                                                                        |              |                                            |
|-----------------------------------------------|-------------------|----------------------------------------------------------------------------------------------------------------------------------------|--------------|--------------------------------------------|
| ECFP_4                                        | 1407472008        | 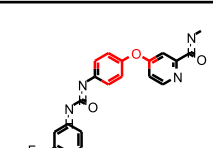<br>[*]:[c](*)O[c]1:[cH]:[cH]:[cH]:[cH]:1            | 0.351        | 1 out of 1                                 |
| ECFP_4                                        | 143734695         | <br>[*][c]1[*]:[cH]:[cH]:[c](O[c](:[*]):[*]):[cH]:1 | 0.351        | 1 out of 1                                 |
| <b>Top Features for negative contribution</b> |                   |                                                                                                                                        |              |                                            |
| <b>Fingerprint</b>                            | <b>Bit/Smiles</b> | <b>Feature Structure</b>                                                                                                               | <b>Score</b> | <b>Multiple-Carcinogen in training set</b> |
| ECFP_4                                        | 888054369         | <br>[*]N[c]1:[cH]:[*]:[c]([*]):[cH]:[cH]:1          | -0.8         | 0 out of 3                                 |
| ECFP_4                                        | 1335691903        | <br>[*][c](:[*]):[c](Cl):[cH]:[*]                 | -0.8         | 0 out of 3                                 |
| ECFP_4                                        | 1338334141        | <br>[*]C(=[*])NC                                  | -0.597       | 0 out of 2                                 |



10a

TOPKAT\_Mouse\_Male\_FDA\_None\_vs\_Carcinogen

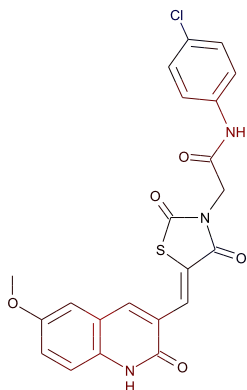C<sub>22</sub>H<sub>16</sub>ClN<sub>3</sub>O<sub>5</sub>S

Molecular Weight: 469.89753

ALogP: 2.815

Rotatable Bonds: 5

Acceptors: 6

Donors: 2

### Model Prediction

Prediction: Carcinogen

Probability: 0.399

Enrichment: 1.36

Bayesian Score: 3

Mahalanobis Distance: 13.8

Mahalanobis Distance p-value: 1.72e-005

Prediction: Positive if the Bayesian score is above the estimated best cutoff value from minimizing the false positive and false negative rate.

Probability: The estimated probability that the sample is in the positive category. This assumes that the Bayesian score follows a normal distribution and is different from the prediction using a cutoff.

Enrichment: An estimate of enrichment, that is, the increased likelihood (versus random) of this sample being in the category.

Bayesian Score: The standard Laplacian-modified Bayesian score.

Mahalanobis Distance: The Mahalanobis distance (MD) is the distance to the center of the training data. The larger the MD, the less trustworthy the prediction.

Mahalanobis Distance p-value: The p-value gives the fraction of training data with an MD greater than or equal to the one for the given sample, assuming normally distributed data. The smaller the p-value, the less trustworthy the prediction. For highly non-normal X properties (e.g., fingerprints), the MD p-value is wildly inaccurate.

### Structural Similar Compounds

| Name               | Bicalutamide                                                        | Moricizine                                                          | Glipizide                                                           |
|--------------------|---------------------------------------------------------------------|---------------------------------------------------------------------|---------------------------------------------------------------------|
| Structure          |                                                                     |                                                                     |                                                                     |
| Actual Endpoint    | Carcinogen                                                          | Non-Carcinogen                                                      | Non-Carcinogen                                                      |
| Predicted Endpoint | Carcinogen                                                          | Non-Carcinogen                                                      | Non-Carcinogen                                                      |
| Distance           | 0.536                                                               | 0.632                                                               | 0.681                                                               |
| Reference          | US FDA (Centre for Drug Eval.& Res./Off. Testing & Res.) Sept. 1997 | US FDA (Centre for Drug Eval.& Res./Off. Testing & Res.) Sept. 1997 | US FDA (Centre for Drug Eval.& Res./Off. Testing & Res.) Sept. 1997 |

### Model Applicability

Unknown features are fingerprint features in the query molecule, but not found or appearing too infrequently in the training set.

1. All properties and OPS components are within expected ranges.

### Feature Contribution

#### Top features for positive contribution

| Fingerprint | Bit/Smiles | Feature Structure                                 | Score | Carcinogen in training set |
|-------------|------------|---------------------------------------------------|-------|----------------------------|
| FCFP_6      | 1757681964 | <br>[*][c]1:[cH]:[cH]:[c]<br>(OC):[cH]:[c]:1C=[*] | 0.676 | 2 out of 2                 |

|                                               |                   |                                                                                                                                                   |              |                                   |
|-----------------------------------------------|-------------------|---------------------------------------------------------------------------------------------------------------------------------------------------|--------------|-----------------------------------|
| FCFP_6                                        | -451043714        | 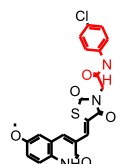<br><chem>[*]CC(=O)N(c1:[cH]:[cH]:[c]([*]):[cH]:[cH]):1</chem> | 0.676        | 2 out of 2                        |
| FCFP_6                                        | 1175665944        | <br><chem>[*]C1=[*][c]([*]):[c](NC1=O):[cH]:[*]</chem>         | 0.655        | 7 out of 12                       |
| <b>Top Features for negative contribution</b> |                   |                                                                                                                                                   |              |                                   |
| <b>Fingerprint</b>                            | <b>Bit/Smiles</b> | <b>Feature Structure</b>                                                                                                                          | <b>Score</b> | <b>Carcinogen in training set</b> |
| FCFP_6                                        | -1553874037       | <br><chem>[*]CN1C(=[*])[*]C1=</chem>                           | -0.45        | 5 out of 32                       |
| FCFP_6                                        | 551850122         | <br><chem>[*][c]1:[*]:[cH]:[c](Cl):[cH]:[cH]:1</chem>         | -0.433       | 8 out of 49                       |
| FCFP_6                                        | 71476542          | <br><chem>[*]:[c]([*])Cl</chem>                              | -0.406       | 10 out of 59                      |

10b

TOPKAT\_Mouse\_Male\_FDA\_None\_vs\_Carcinogen

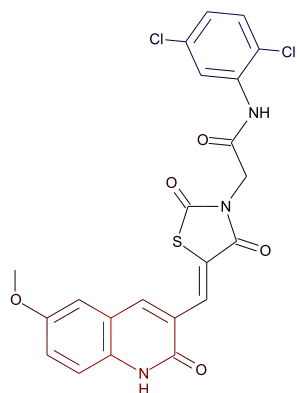C<sub>22</sub>H<sub>15</sub>Cl<sub>2</sub>N<sub>3</sub>O<sub>5</sub>S

Molecular Weight: 504.3426

ALogP: 3.479

Rotatable Bonds: 5

Acceptors: 6

Donors: 2

### Model Prediction

**Prediction: Carcinogen**

Probability: 0.332

Enrichment: 1.13

Bayesian Score: 0.921

Mahalanobis Distance: 13.8

Mahalanobis Distance p-value: 1.31e-005

Prediction: Positive if the Bayesian score is above the estimated best cutoff value from minimizing the false positive and false negative rate.

Probability: The estimated probability that the sample is in the positive category. This assumes that the Bayesian score follows a normal distribution and is different from the prediction using a cutoff.

Enrichment: An estimate of enrichment, that is, the increased likelihood (versus random) of this sample being in the category.

Bayesian Score: The standard Laplacian-modified Bayesian score.

Mahalanobis Distance: The Mahalanobis distance (MD) is the distance to the center of the training data. The larger the MD, the less trustworthy the prediction.

Mahalanobis Distance p-value: The p-value gives the fraction of training data with an MD greater than or equal to the one for the given sample, assuming normally distributed data. The smaller the p-value, the less trustworthy the prediction. For highly non-normal X properties (e.g., fingerprints), the MD p-value is wildly inaccurate.

### Structural Similar Compounds

| Name               | Bicalutamide                                                        | Fluticasone                                                         | Moricizine                                                          |
|--------------------|---------------------------------------------------------------------|---------------------------------------------------------------------|---------------------------------------------------------------------|
| Structure          |                                                                     |                                                                     |                                                                     |
| Actual Endpoint    | Carcinogen                                                          | Non-Carcinogen                                                      | Non-Carcinogen                                                      |
| Predicted Endpoint | Carcinogen                                                          | Carcinogen                                                          | Non-Carcinogen                                                      |
| Distance           | 0.595                                                               | 0.653                                                               | 0.663                                                               |
| Reference          | US FDA (Centre for Drug Eval.& Res./Off. Testing & Res.) Sept. 1997 | US FDA (Centre for Drug Eval.& Res./Off. Testing & Res.) Sept. 1997 | US FDA (Centre for Drug Eval.& Res./Off. Testing & Res.) Sept. 1997 |

### Model Applicability

Unknown features are fingerprint features in the query molecule, but not found or appearing too infrequently in the training set.

1. All properties and OPS components are within expected ranges.

### Feature Contribution

#### Top features for positive contribution

| Fingerprint | Bit/Smiles | Feature Structure                                 | Score | Carcinogen in training set |
|-------------|------------|---------------------------------------------------|-------|----------------------------|
| FCFP_6      | 1757681964 | <br>[*][c]1:[cH]:[cH]:[c]<br>(OC):[cH]:[c]:1C=[*] | 0.676 | 2 out of 2                 |

|                                               |                   |                                                                                                                                              |              |                                   |
|-----------------------------------------------|-------------------|----------------------------------------------------------------------------------------------------------------------------------------------|--------------|-----------------------------------|
| FCFP_6                                        | 1175665944        | 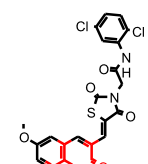<br><chem>[*]C1=[*][c]([*]):[c](NC1=O):[cH]:[*]</chem>    | 0.655        | 7 out of 12                       |
| FCFP_6                                        | 451847724         | <br><chem>[*]C(=CC(=[*])[*])[*]</chem>                    | 0.479        | 21 out of 48                      |
| <b>Top Features for negative contribution</b> |                   |                                                                                                                                              |              |                                   |
| <b>Fingerprint</b>                            | <b>Bit/Smiles</b> | <b>Feature Structure</b>                                                                                                                     | <b>Score</b> | <b>Carcinogen in training set</b> |
| FCFP_6                                        | 1783756416        | <br><chem>[*]N[c]1:[cH]:[*]:[cH]:[cH]:[cH]:[c]:1Cl</chem> | -0.719       | 0 out of 4                        |
| FCFP_6                                        | 1553874037        | <br><chem>[*]CN1C(=[*])[*]C1=[*]</chem>                  | -0.45        | 5 out of 32                       |
| FCFP_6                                        | 551850122         | <br><chem>[*][c]1:[*]:[cH]:[c]([Cl]):[cH]:[cH]:1</chem> | -0.433       | 8 out of 49                       |

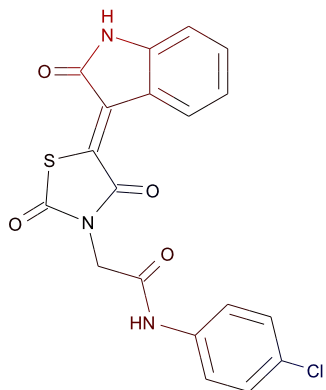

$C_{19}H_{12}ClN_3O_4S$

Molecular Weight: 413.83428

ALogP: 2.363

Rotatable Bonds: 3

Acceptors: 5

Donors: 2

## Model Prediction

**Prediction: Carcinogen**

Probability: 0.364

Enrichment: 1.24

Bayesian Score: 1.95

Mahalanobis Distance: 10.6

Mahalanobis Distance p-value: 0.162

Prediction: Positive if the Bayesian score is above the estimated best cutoff value from minimizing the false positive and false negative rate.

Probability: The estimated probability that the sample is in the positive category. This assumes that the Bayesian score follows a normal distribution and is different from the prediction using a cutoff.

Enrichment: An estimate of enrichment, that is, the increased likelihood (versus random) of this sample being in the category.

Bayesian Score: The standard Laplacian-modified Bayesian score.

Mahalanobis Distance: The Mahalanobis distance (MD) is the distance to the center of the training data. The larger the MD, the less trustworthy the prediction.

Mahalanobis Distance p-value: The p-value gives the fraction of training data with an MD greater than or equal to the one for the given sample, assuming normally distributed data. The smaller the p-value, the less trustworthy the prediction. For highly non-normal X properties (e.g., fingerprints), the MD p-value is wildly inaccurate.

## Structural Similar Compounds

| Name               | Indapamide                                                          | Metolazone                                                          | Bicalutamide                                                        |
|--------------------|---------------------------------------------------------------------|---------------------------------------------------------------------|---------------------------------------------------------------------|
| Structure          |                                                                     |                                                                     |                                                                     |
| Actual Endpoint    | Non-Carcinogen                                                      | Non-Carcinogen                                                      | Carcinogen                                                          |
| Predicted Endpoint | Non-Carcinogen                                                      | Non-Carcinogen                                                      | Carcinogen                                                          |
| Distance           | 0.554                                                               | 0.555                                                               | 0.594                                                               |
| Reference          | US FDA (Centre for Drug Eval.& Res./Off. Testing & Res.) Sept. 1997 | US FDA (Centre for Drug Eval.& Res./Off. Testing & Res.) Sept. 1997 | US FDA (Centre for Drug Eval.& Res./Off. Testing & Res.) Sept. 1997 |

## Model Applicability

Unknown features are fingerprint features in the query molecule, but not found or appearing too infrequently in the training set.

1. All properties and OPS components are within expected ranges.

## Feature Contribution

### Top features for positive contribution

| Fingerprint | Bit/Smiles | Feature Structure                                                 | Score | Carcinogen in training set |
|-------------|------------|-------------------------------------------------------------------|-------|----------------------------|
| FCFP_6      | 451043714  | <br><chem>*]CC(=O)N(c)[cH]:[cH]:[cH]:[c]([*]):[cH]:[c]H];1</chem> | 0.676 | 2 out of 2                 |

|                                               |                   |                                                                                                                                               |              |                                   |
|-----------------------------------------------|-------------------|-----------------------------------------------------------------------------------------------------------------------------------------------|--------------|-----------------------------------|
| FCFP_6                                        | 1175665944        | 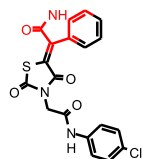<br><chem>[*]C1=[*][c](:[*]):[c](NC1=O):[cH]:[*]</chem>    | 0.655        | 7 out of 12                       |
| FCFP_6                                        | -1838187238       | <br><chem>[*]C(=[*])N[c]1:[cH]:[cH]:[*]:[cH]:[cH]:1</chem> | 0.565        | 4 out of 7                        |
| <b>Top Features for negative contribution</b> |                   |                                                                                                                                               |              |                                   |
| <b>Fingerprint</b>                            | <b>Bit/Smiles</b> | <b>Feature Structure</b>                                                                                                                      | <b>Score</b> | <b>Carcinogen in training set</b> |
| FCFP_6                                        | -1553874037       | <br><chem>[*]CN1C(=[*])[*]C1=</chem>                       | -0.45        | 5 out of 32                       |
| FCFP_6                                        | 551850122         | <br><chem>[*][c]1:[*]:[cH]:[c](Cl):[cH]:[cH]:1</chem>     | -0.433       | 8 out of 49                       |
| FCFP_6                                        | 71476542          | <br><chem>[*]:[c](:[*])Cl</chem>                         | -0.406       | 10 out of 59                      |



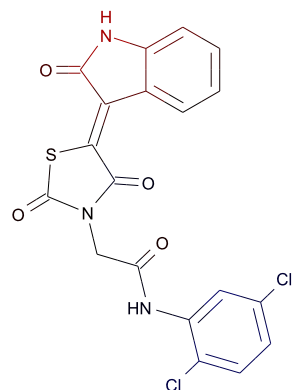

$C_{19}H_{11}Cl_2N_3O_4S$

Molecular Weight: 448.27933

ALogP: 3.028

Rotatable Bonds: 3

Acceptors: 5

Donors: 2

## Model Prediction

Prediction: **Carcinogen**

Probability: 0.299

Enrichment: 1.02

Bayesian Score: -0.241

Mahalanobis Distance: 10.8

Mahalanobis Distance p-value: 0.112

Prediction: Positive if the Bayesian score is above the estimated best cutoff value from minimizing the false positive and false negative rate.

Probability: The estimated probability that the sample is in the positive category. This assumes that the Bayesian score follows a normal distribution and is different from the prediction using a cutoff.

Enrichment: An estimate of enrichment, that is, the increased likelihood (versus random) of this sample being in the category.

Bayesian Score: The standard Laplacian-modified Bayesian score.

Mahalanobis Distance: The Mahalanobis distance (MD) is the distance to the center of the training data. The larger the MD, the less trustworthy the prediction.

Mahalanobis Distance p-value: The p-value gives the fraction of training data with an MD greater than or equal to the one for the given sample, assuming normally distributed data. The smaller the p-value, the less trustworthy the prediction. For highly non-normal X properties (e.g., fingerprints), the MD p-value is wildly inaccurate.

## Structural Similar Compounds

| Name               | Metolazone                                                          | Bicalutamide                                                        | Indapamide                                                          |
|--------------------|---------------------------------------------------------------------|---------------------------------------------------------------------|---------------------------------------------------------------------|
| Structure          |                                                                     |                                                                     |                                                                     |
| Actual Endpoint    | Non-Carcinogen                                                      | Carcinogen                                                          | Non-Carcinogen                                                      |
| Predicted Endpoint | Non-Carcinogen                                                      | Carcinogen                                                          | Non-Carcinogen                                                      |
| Distance           | 0.597                                                               | 0.599                                                               | 0.599                                                               |
| Reference          | US FDA (Centre for Drug Eval.& Res./Off. Testing & Res.) Sept. 1997 | US FDA (Centre for Drug Eval.& Res./Off. Testing & Res.) Sept. 1997 | US FDA (Centre for Drug Eval.& Res./Off. Testing & Res.) Sept. 1997 |

## Model Applicability

Unknown features are fingerprint features in the query molecule, but not found or appearing too infrequently in the training set.

1. All properties and OPS components are within expected ranges.

## Feature Contribution

### Top features for positive contribution

| Fingerprint | Bit/Smiles | Feature Structure                          | Score | Carcinogen in training set |
|-------------|------------|--------------------------------------------|-------|----------------------------|
| FCFP_6      | 1175665944 | <br>[*]C1=[*][c](:[*]):[c](NC1=O):[cH]:[*] | 0.655 | 7 out of 12                |

|                                               |                   |                                                                                                                                              |              |                                   |
|-----------------------------------------------|-------------------|----------------------------------------------------------------------------------------------------------------------------------------------|--------------|-----------------------------------|
| FCFP_6                                        | -1947166985       | 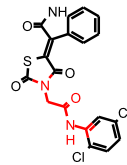<br><chem>[*]N([*])CC(=O)N(c)([*]);[*]</chem>             | 0.46         | 1 out of 1                        |
| FCFP_6                                        | 2036120522        | <br><chem>[*]CN1C(=O)SC(=[*])C1=[*]</chem>                | 0.46         | 1 out of 1                        |
| <b>Top Features for negative contribution</b> |                   |                                                                                                                                              |              |                                   |
| <b>Fingerprint</b>                            | <b>Bit/Smiles</b> | <b>Feature Structure</b>                                                                                                                     | <b>Score</b> | <b>Carcinogen in training set</b> |
| FCFP_6                                        | 1783756416        | <br><chem>[*]N[c]1:[cH]:[*]:[cH]:[cH]:[cH]:[c]:1Cl</chem> | -0.719       | 0 out of 4                        |
| FCFP_6                                        | -1553874037       | <br><chem>[*]CN1C(=[*])[*]1C1=[*]</chem>                 | -0.45        | 5 out of 32                       |
| FCFP_6                                        | 551850122         | <br><chem>[*][c]1:[*]:[cH]:[c](Cl):[cH]:[cH]:1</chem>   | -0.433       | 8 out of 49                       |

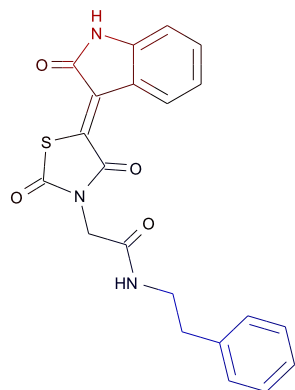

$C_{21}H_{17}N_3O_4S$

Molecular Weight: 407.44237

ALogP: 2.027

Rotatable Bonds: 5

Acceptors: 5

Donors: 2

## Model Prediction

Prediction: Non-Carcinogen

Probability: 0.258

Enrichment: 0.878

Bayesian Score: -1.91

Mahalanobis Distance: 11.3

Mahalanobis Distance p-value: 0.0428

Prediction: Positive if the Bayesian score is above the estimated best cutoff value from minimizing the false positive and false negative rate.

Probability: The estimated probability that the sample is in the positive category. This assumes that the Bayesian score follows a normal distribution and is different from the prediction using a cutoff.

Enrichment: An estimate of enrichment, that is, the increased likelihood (versus random) of this sample being in the category.

Bayesian Score: The standard Laplacian-modified Bayesian score.

Mahalanobis Distance: The Mahalanobis distance (MD) is the distance to the center of the training data. The larger the MD, the less trustworthy the prediction.

Mahalanobis Distance p-value: The p-value gives the fraction of training data with an MD greater than or equal to the one for the given sample, assuming normally distributed data. The smaller the p-value, the less trustworthy the prediction. For highly non-normal X properties (e.g., fingerprints), the MD p-value is wildly inaccurate.

## Structural Similar Compounds

| Name               | Bicalutamide                                                        | Acetohexamide                                                       | Penicillin                                                          |
|--------------------|---------------------------------------------------------------------|---------------------------------------------------------------------|---------------------------------------------------------------------|
| Structure          |                                                                     |                                                                     |                                                                     |
| Actual Endpoint    | Carcinogen                                                          | Non-Carcinogen                                                      | Non-Carcinogen                                                      |
| Predicted Endpoint | Carcinogen                                                          | Non-Carcinogen                                                      | Non-Carcinogen                                                      |
| Distance           | 0.554                                                               | 0.571                                                               | 0.594                                                               |
| Reference          | US FDA (Centre for Drug Eval.& Res./Off. Testing & Res.) Sept. 1997 | US FDA (Centre for Drug Eval.& Res./Off. Testing & Res.) Sept. 1997 | US FDA (Centre for Drug Eval.& Res./Off. Testing & Res.) Sept. 1997 |

## Model Applicability

Unknown features are fingerprint features in the query molecule, but not found or appearing too infrequently in the training set.

1. All properties and OPS components are within expected ranges.

## Feature Contribution

### Top features for positive contribution

| Fingerprint | Bit/Smiles | Feature Structure                               | Score | Carcinogen in training set |
|-------------|------------|-------------------------------------------------|-------|----------------------------|
| FCFP_6      | 1175665944 | <br>[*]C1=[*][c](:[*]):[c]<br>](NC1=O):[cH]:[*] | 0.655 | 7 out of 12                |

|                                               |                   |                                                                                                                                           |              |                                   |
|-----------------------------------------------|-------------------|-------------------------------------------------------------------------------------------------------------------------------------------|--------------|-----------------------------------|
| FCFP_6                                        | 2036120522        | 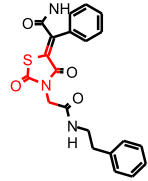<br><chem>[*]CN1C(=O)SC(=[*])C1=[*]</chem>             | 0.46         | 1 out of 1                        |
| FCFP_6                                        | 566058135         | <br><chem>[*]NC(=O)C(=[*])[*]</chem>                   | 0.447        | 17 out of 40                      |
| <b>Top Features for negative contribution</b> |                   |                                                                                                                                           |              |                                   |
| <b>Fingerprint</b>                            | <b>Bit/Smiles</b> | <b>Feature Structure</b>                                                                                                                  | <b>Score</b> | <b>Carcinogen in training set</b> |
| FCFP_6                                        | 1981711554        | <br><chem>[*]CC[c]1:[cH]:[cH]:[cH]:[cH]:[cH]:1</chem>  | -1.42        | 0 out of 12                       |
| FCFP_6                                        | 497728148         | <br><chem>[*]CC[c]1:[cH]:[cH]:[cH]:[cH]:[cH]:1</chem> | -0.96        | 2 out of 26                       |
| FCFP_6                                        | 1553874037        | <br><chem>[*]CN1C(=[*])[*]C1=[*]</chem>              | -0.45        | 5 out of 32                       |

# Sorafenib

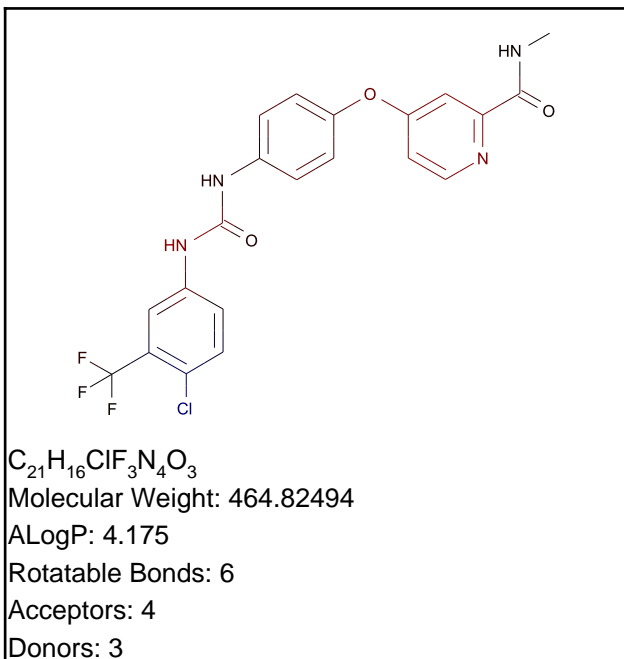

## Model Prediction

Prediction: **Carcinogen**

Probability: 0.444

Enrichment: 1.51

Bayesian Score: 4.21

Mahalanobis Distance: 20.3

Mahalanobis Distance p-value: 1.28e-019

Prediction: Positive if the Bayesian score is above the estimated best cutoff value from minimizing the false positive and false negative rate.

Probability: The estimated probability that the sample is in the positive category. This assumes that the Bayesian score follows a normal distribution and is different from the prediction using a cutoff.

Enrichment: An estimate of enrichment, that is, the increased likelihood (versus random) of this sample being in the category.

Bayesian Score: The standard Laplacian-modified Bayesian score.

Mahalanobis Distance: The Mahalanobis distance (MD) is the distance to the center of the training data. The larger the MD, the less trustworthy the prediction.

Mahalanobis Distance p-value: The p-value gives the fraction of training data with an MD greater than or equal to the one for the given sample, assuming normally distributed data. The smaller the p-value, the less trustworthy the prediction. For highly non-normal X properties (e.g., fingerprints), the MD p-value is wildly inaccurate.

# TOPKAT\_Mouse\_Male\_FDA\_None\_vs\_Carcinogen

## Structural Similar Compounds

| Name               | Glyburide                                                                           | Glimepiride                                                                         | Fluvastatin                                                                         |
|--------------------|-------------------------------------------------------------------------------------|-------------------------------------------------------------------------------------|-------------------------------------------------------------------------------------|
| Structure          | 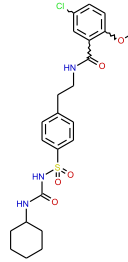 |  |  |
| Actual Endpoint    | Non-Carcinogen                                                                      | Carcinogen                                                                          | Non-Carcinogen                                                                      |
| Predicted Endpoint | Non-Carcinogen                                                                      | Carcinogen                                                                          | Non-Carcinogen                                                                      |
| Distance           | 0.594                                                                               | 0.599                                                                               | 0.603                                                                               |
| Reference          | US FDA (Centre for Drug Eval.& Res./Off. Testing & Res.) Sept. 1997                 | US FDA (Centre for Drug Eval.& Res./Off. Testing & Res.) Sept. 1997                 | US FDA (Centre for Drug Eval.& Res./Off. Testing & Res.) Sept. 1997                 |

## Model Applicability

Unknown features are fingerprint features in the query molecule, but not found or appearing too infrequently in the training set.

1. All properties and OPS components are within expected ranges.

## Feature Contribution

### Top features for positive contribution

| Fingerprint | Bit/Smiles | Feature Structure                                                                                        | Score | Carcinogen in training set |
|-------------|------------|----------------------------------------------------------------------------------------------------------|-------|----------------------------|
| FCFP_6      | 71953198   | 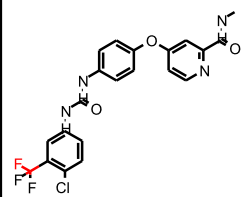<br>[*]C([*])([*])F | 0.612 | 12 out of 23               |

|                                               |                   |                                                                                                                                               |              |                                   |
|-----------------------------------------------|-------------------|-----------------------------------------------------------------------------------------------------------------------------------------------|--------------|-----------------------------------|
| FCFP_6                                        | 1838187238        | 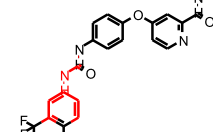<br>[*]C(=[*])N[c]1:[cH]:<br>[cH]:[*]:[cH]:[cH]:1          | 0.565        | 4 out of 7                        |
| FCFP_6                                        | 140656626         | <br>[*]O[c]1:[cH]:[cH]:n:<br>[c](:[cH]:1)C(=[*])[<br>*]    | 0.46         | 1 out of 1                        |
| <b>Top Features for negative contribution</b> |                   |                                                                                                                                               |              |                                   |
| <b>Fingerprint</b>                            | <b>Bit/Smiles</b> | <b>Feature Structure</b>                                                                                                                      | <b>Score</b> | <b>Carcinogen in training set</b> |
| FCFP_6                                        | 2104062943        | <br>[*]C(=[*])([*])[c]1:[c<br>H]:[*]:[cH]:[cH]:[c]<br>:1Cl | -1.01        | 1 out of 17                       |
| FCFP_6                                        | 551850122         | <br>[*][c]1:[*]:[cH]:[c](<br>Cl):[cH]:[cH]:1              | -0.433       | 8 out of 49                       |
| FCFP_6                                        | 71476542          | <br>[*]:[c](:[*])Cl                                      | -0.406       | 10 out of 59                      |

# Sunitinib

# TOPKAT\_Mouse\_Male\_FDA\_None\_vs\_Carcinogen

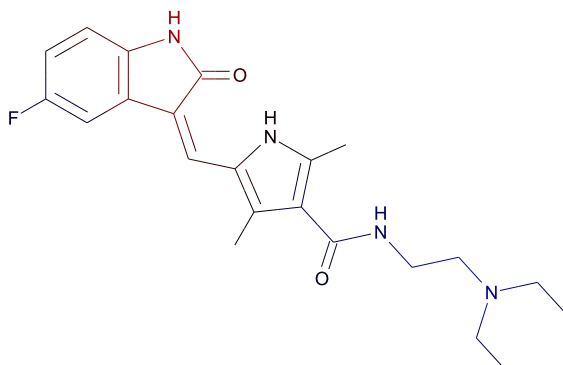

C<sub>22</sub>H<sub>27</sub>FN<sub>4</sub>O<sub>2</sub>

Molecular Weight: 398.47378

ALogP: 2.997

Rotatable Bonds: 7

Acceptors: 3

Donors: 3

## Model Prediction

Prediction: Non-Carcinogen

Probability: 0.247

Enrichment: 0.839

Bayesian Score: -2.43

Mahalanobis Distance: 14.2

Mahalanobis Distance p-value: 2.87e-006

Prediction: Positive if the Bayesian score is above the estimated best cutoff value from minimizing the false positive and false negative rate.

Probability: The estimated probability that the sample is in the positive category. This assumes that the Bayesian score follows a normal distribution and is different from the prediction using a cutoff.

Enrichment: An estimate of enrichment, that is, the increased likelihood (versus random) of this sample being in the category.

Bayesian Score: The standard Laplacian-modified Bayesian score.

Mahalanobis Distance: The Mahalanobis distance (MD) is the distance to the center of the training data. The larger the MD, the less trustworthy the prediction.

Mahalanobis Distance p-value: The p-value gives the fraction of training data with an MD greater than or equal to the one for the given sample, assuming normally distributed data. The smaller the p-value, the less trustworthy the prediction. For highly non-normal X properties (e.g., fingerprints), the MD p-value is wildly inaccurate.

## Structural Similar Compounds

| Name               | Metoclopramide                                                                      | Fluvastatin                                                                         | Torsemide                                                                           |
|--------------------|-------------------------------------------------------------------------------------|-------------------------------------------------------------------------------------|-------------------------------------------------------------------------------------|
| Structure          | 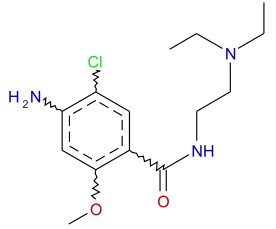 |  |  |
| Actual Endpoint    | Non-Carcinogen                                                                      | Non-Carcinogen                                                                      | Non-Carcinogen                                                                      |
| Predicted Endpoint | Non-Carcinogen                                                                      | Non-Carcinogen                                                                      | Non-Carcinogen                                                                      |
| Distance           | 0.590                                                                               | 0.603                                                                               | 0.650                                                                               |
| Reference          | US FDA (Centre for Drug Eval.& Res./Off. Testing & Res.) Sept. 1997                 | US FDA (Centre for Drug Eval.& Res./Off. Testing & Res.) Sept. 1997                 | US FDA (Centre for Drug Eval.& Res./Off. Testing & Res.) Sept. 1997                 |

## Model Applicability

Unknown features are fingerprint features in the query molecule, but not found or appearing too infrequently in the training set.

1. All properties and OPS components are within expected ranges.

## Feature Contribution

### Top features for positive contribution

| Fingerprint | Bit/Smiles | Feature Structure                                                                                                                            | Score | Carcinogen in training set |
|-------------|------------|----------------------------------------------------------------------------------------------------------------------------------------------|-------|----------------------------|
| FCFP_6      | 1175665944 | 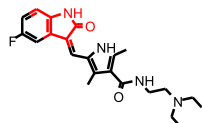<br><chem>[*]C1=[*][c](:[*]):[c](NC1=O):[cH]:[*]</chem> | 0.655 | 7 out of 12                |

|                                               |                   |                                                                                                                                               |              |                                   |
|-----------------------------------------------|-------------------|-----------------------------------------------------------------------------------------------------------------------------------------------|--------------|-----------------------------------|
| FCFP_6                                        | 566058135         | 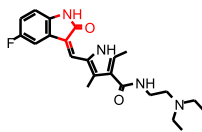<br><chem>[*]NC(=O)C(=[*])[*]</chem>                       | 0.447        | 17 out of 40                      |
| FCFP_6                                        | 1294255210        | <br><chem>[*]C(=[*])N[c](:[*]):</chem><br><chem>[*]</chem> | 0.441        | 12 out of 28                      |
| <b>Top Features for negative contribution</b> |                   |                                                                                                                                               |              |                                   |
| <b>Fingerprint</b>                            | <b>Bit/Smiles</b> | <b>Feature Structure</b>                                                                                                                      | <b>Score</b> | <b>Carcinogen in training set</b> |
| FCFP_6                                        | 172450560         | <br><chem>[*]CCNC(=O)[c](:[*]):</chem><br><chem>[*]</chem> | -0.839       | 0 out of 5                        |
| FCFP_6                                        | 1851332093        | <br><chem>[*]CN(C[*])CC</chem>                            | -0.582       | 0 out of 3                        |
| FCFP_6                                        | -587569116        | <br><chem>[*]CCN([*])[*]</chem>                          | -0.551       | 7 out of 49                       |



10a

TOPKAT\_Mouse\_Male\_FDA\_Single\_vs\_Multiple

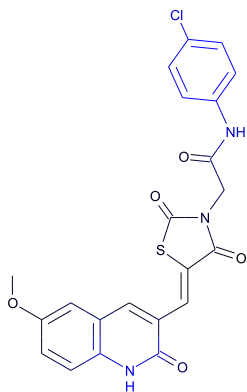C<sub>22</sub>H<sub>16</sub>ClN<sub>3</sub>O<sub>5</sub>S

Molecular Weight: 469.89753

ALogP: 2.815

Rotatable Bonds: 5

Acceptors: 6

Donors: 2

### Model Prediction

Prediction: Single-Carcinogen

Probability: 0.124

Enrichment: 0.41

Bayesian Score: -16.6

Mahalanobis Distance: 12.4

Mahalanobis Distance p-value: 0.000276

Prediction: Positive if the Bayesian score is above the estimated best cutoff value from minimizing the false positive and false negative rate.

Probability: The estimated probability that the sample is in the positive category. This assumes that the Bayesian score follows a normal distribution and is different from the prediction using a cutoff.

Enrichment: An estimate of enrichment, that is, the increased likelihood (versus random) of this sample being in the category.

Bayesian Score: The standard Laplacian-modified Bayesian score.

Mahalanobis Distance: The Mahalanobis distance (MD) is the distance to the center of the training data. The larger the MD, the less trustworthy the prediction.

Mahalanobis Distance p-value: The p-value gives the fraction of training data with an MD greater than or equal to the one for the given sample, assuming normally distributed data. The smaller the p-value, the less trustworthy the prediction. For highly non-normal X properties (e.g., fingerprints), the MD p-value is wildly inaccurate.

### Structural Similar Compounds

| Name               | Bicalutamide                                                        | Glimepiride                                                         | Flunisolide                                                         |
|--------------------|---------------------------------------------------------------------|---------------------------------------------------------------------|---------------------------------------------------------------------|
| Structure          |                                                                     |                                                                     |                                                                     |
| Actual Endpoint    | Single-Carcinogen                                                   | Single-Carcinogen                                                   | Single-Carcinogen                                                   |
| Predicted Endpoint | Single-Carcinogen                                                   | Single-Carcinogen                                                   | Single-Carcinogen                                                   |
| Distance           | 0.588                                                               | 0.743                                                               | 0.763                                                               |
| Reference          | US FDA (Centre for Drug Eval.& Res./Off. Testing & Res.) Sept. 1997 | US FDA (Centre for Drug Eval.& Res./Off. Testing & Res.) Sept. 1997 | US FDA (Centre for Drug Eval.& Res./Off. Testing & Res.) Sept. 1997 |

### Model Applicability

Unknown features are fingerprint features in the query molecule, but not found or appearing too infrequently in the training set.

1. OPS PC5 out of range. Value: 5.3116. Training min, max, SD, explained variance: -3.5268, 3.8048, 1.733, 0.0560.

### Feature Contribution

#### Top features for positive contribution

| Fingerprint | Bit/Smiles | Feature Structure       | Score | Multiple-Carcinogen in training set |
|-------------|------------|-------------------------|-------|-------------------------------------|
| FCFP_12     | 451847724  | <br>[*]C(=CC(=*)[*])[*] | 0.3   | 10 out of 21                        |

|                                               |                   |                                                                                                                                                              |              |                                            |
|-----------------------------------------------|-------------------|--------------------------------------------------------------------------------------------------------------------------------------------------------------|--------------|--------------------------------------------|
| FCFP_12                                       | 436886043         | 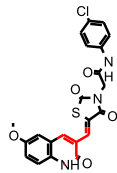<br><chem>[*]C=C(C(=[*])C(=[*]))[*]</chem>                                | 0.27         | 7 out of 15                                |
| FCFP_12                                       | 565998553         | <br><chem>[*]N1[*][*]C(=[*])C1=O</chem>                                   | 0.194        | 6 out of 14                                |
| <b>Top Features for negative contribution</b> |                   |                                                                                                                                                              |              |                                            |
| <b>Fingerprint</b>                            | <b>Bit/Smiles</b> | <b>Feature Structure</b>                                                                                                                                     | <b>Score</b> | <b>Multiple-Carcinogen in training set</b> |
| FCFP_12                                       | 1294255210        | <br><chem>[*]C(=[*])N(c(:[*])):</chem><br><chem>[*]</chem>                | -1.63        | 0 out of 12                                |
| FCFP_12                                       | 1175665944        | <br><chem>[*]C1=[*][c]([*]):</chem><br><chem>[c](NC1=O):[cH]:[*]</chem> | -1.22        | 0 out of 7                                 |
| FCFP_12                                       | 590925877         | <br><chem>[*]N(c(:[cH]:[*])):</chem><br><chem>[c]H:[*]</chem>           | -0.998       | 1 out of 13                                |



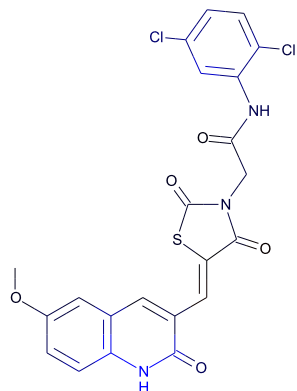

$C_{22}H_{15}Cl_2N_3O_5S$

Molecular Weight: 504.3426

ALogP: 3.479

Rotatable Bonds: 5

Acceptors: 6

Donors: 2

## Model Prediction

Prediction: Single-Carcinogen

Probability: 0.142

Enrichment: 0.473

Bayesian Score: -14.3

Mahalanobis Distance: 12.6

Mahalanobis Distance p-value: 0.000217

Prediction: Positive if the Bayesian score is above the estimated best cutoff value from minimizing the false positive and false negative rate.

Probability: The estimated probability that the sample is in the positive category. This assumes that the Bayesian score follows a normal distribution and is different from the prediction using a cutoff.

Enrichment: An estimate of enrichment, that is, the increased likelihood (versus random) of this sample being in the category.

Bayesian Score: The standard Laplacian-modified Bayesian score.

Mahalanobis Distance: The Mahalanobis distance (MD) is the distance to the center of the training data. The larger the MD, the less trustworthy the prediction.

Mahalanobis Distance p-value: The p-value gives the fraction of training data with an MD greater than or equal to the one for the given sample, assuming normally distributed data. The smaller the p-value, the less trustworthy the prediction. For highly non-normal X properties (e.g., fingerprints), the MD p-value is wildly inaccurate.

## Structural Similar Compounds

| Name               | Bicalutamide                                                        | Glimepiride                                                         | Flunisolide                                                         |
|--------------------|---------------------------------------------------------------------|---------------------------------------------------------------------|---------------------------------------------------------------------|
| Structure          |                                                                     |                                                                     |                                                                     |
| Actual Endpoint    | Single-Carcinogen                                                   | Single-Carcinogen                                                   | Single-Carcinogen                                                   |
| Predicted Endpoint | Single-Carcinogen                                                   | Single-Carcinogen                                                   | Single-Carcinogen                                                   |
| Distance           | 0.638                                                               | 0.728                                                               | 0.812                                                               |
| Reference          | US FDA (Centre for Drug Eval.& Res./Off. Testing & Res.) Sept. 1997 | US FDA (Centre for Drug Eval.& Res./Off. Testing & Res.) Sept. 1997 | US FDA (Centre for Drug Eval.& Res./Off. Testing & Res.) Sept. 1997 |

## Model Applicability

Unknown features are fingerprint features in the query molecule, but not found or appearing too infrequently in the training set.

- OPS PC5 out of range. Value: 5.3016. Training min, max, SD, explained variance: -3.5268, 3.8048, 1.733, 0.0560.

## Feature Contribution

### Top features for positive contribution

| Fingerprint | Bit/Smiles | Feature Structure                     | Score | Multiple-Carcinogen in training set |
|-------------|------------|---------------------------------------|-------|-------------------------------------|
| FCFP_12     | 451847724  | <br><chem>[*]C(=CC(=O)N[*])[*]</chem> | 0.3   | 10 out of 21                        |

|                                               |                   |                                                                                                                                 |              |                                            |
|-----------------------------------------------|-------------------|---------------------------------------------------------------------------------------------------------------------------------|--------------|--------------------------------------------|
| FCFP_12                                       | 436886043         | 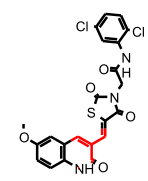<br>[*]C=C(C=[*])C(=[*])[*]                  | 0.27         | 7 out of 15                                |
| FCFP_12                                       | 565998553         | <br>[*]N1[*][*]C(=[*])C1=O                   | 0.194        | 6 out of 14                                |
| <b>Top Features for negative contribution</b> |                   |                                                                                                                                 |              |                                            |
| <b>Fingerprint</b>                            | <b>Bit/Smiles</b> | <b>Feature Structure</b>                                                                                                        | <b>Score</b> | <b>Multiple-Carcinogen in training set</b> |
| FCFP_12                                       | 1294255210        | <br>[*]C(=[*])N(c(:[*])): [*]                | -1.63        | 0 out of 12                                |
| FCFP_12                                       | 1175665944        | <br>[*]C1=[*][c](:[*]):[c](NC1=O):[cH]:[*] | -1.22        | 0 out of 7                                 |
| FCFP_12                                       | 590925877         | <br>[*]N(c(:[cH]):[*]):[cH]:[*]            | -0.998       | 1 out of 13                                |



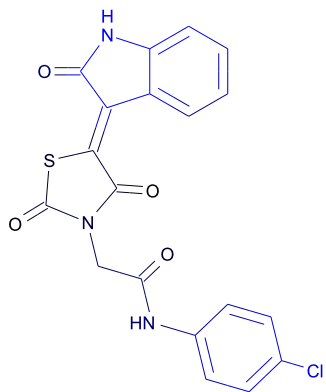

$C_{19}H_{12}ClN_3O_4S$

Molecular Weight: 413.83428

ALogP: 2.363

Rotatable Bonds: 3

Acceptors: 5

Donors: 2

## Model Prediction

Prediction: Single-Carcinogen

Probability: 0.103

Enrichment: 0.342

Bayesian Score: -19.4

Mahalanobis Distance: 12.7

Mahalanobis Distance p-value: 0.000168

Prediction: Positive if the Bayesian score is above the estimated best cutoff value from minimizing the false positive and false negative rate.

Probability: The estimated probability that the sample is in the positive category. This assumes that the Bayesian score follows a normal distribution and is different from the prediction using a cutoff.

Enrichment: An estimate of enrichment, that is, the increased likelihood (versus random) of this sample being in the category.

Bayesian Score: The standard Laplacian-modified Bayesian score.

Mahalanobis Distance: The Mahalanobis distance (MD) is the distance to the center of the training data. The larger the MD, the less trustworthy the prediction.

Mahalanobis Distance p-value: The p-value gives the fraction of training data with an MD greater than or equal to the one for the given sample, assuming normally distributed data. The smaller the p-value, the less trustworthy the prediction. For highly non-normal X properties (e.g., fingerprints), the MD p-value is wildly inaccurate.

## Structural Similar Compounds

| Name               | Bicalutamide                                                        | Flunisolide                                                         | Sulfamethazine                                                      |
|--------------------|---------------------------------------------------------------------|---------------------------------------------------------------------|---------------------------------------------------------------------|
| Structure          |                                                                     |                                                                     |                                                                     |
| Actual Endpoint    | Single-Carcinogen                                                   | Single-Carcinogen                                                   | Single-Carcinogen                                                   |
| Predicted Endpoint | Single-Carcinogen                                                   | Single-Carcinogen                                                   | Single-Carcinogen                                                   |
| Distance           | 0.646                                                               | 0.707                                                               | 0.735                                                               |
| Reference          | US FDA (Centre for Drug Eval.& Res./Off. Testing & Res.) Sept. 1997 | US FDA (Centre for Drug Eval.& Res./Off. Testing & Res.) Sept. 1997 | US FDA (Centre for Drug Eval.& Res./Off. Testing & Res.) Sept. 1997 |

## Model Applicability

Unknown features are fingerprint features in the query molecule, but not found or appearing too infrequently in the training set.

1. All properties and OPS components are within expected ranges.

## Feature Contribution

### Top features for positive contribution

| Fingerprint | Bit/Smiles | Feature Structure                     | Score | Multiple-Carcinogen in training set |
|-------------|------------|---------------------------------------|-------|-------------------------------------|
| FCFP_12     | 565998553  | <br><chem>[*]N1[*][*]C(=O)C1=O</chem> | 0.194 | 6 out of 14                         |

### Top Features for negative contribution

| Fingerprint | Bit/Smiles | Feature Structure                                                                                                                                          | Score  | Multiple-Carcinogen in training set |
|-------------|------------|------------------------------------------------------------------------------------------------------------------------------------------------------------|--------|-------------------------------------|
| FCFP_12     | 1294255210 | 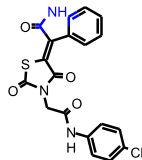<br><chem>[*]C(=[*])N(c(:[*])):</chem><br><chem>[*]</chem>              | -1.63  | 0 out of 12                         |
| FCFP_12     | 1175665944 | <br><chem>[*]C1=[*][c(:[*]):[c</chem><br><chem>](NC1=O):[cH]:[*]</chem> | -1.22  | 0 out of 7                          |
| FCFP_12     | 590925877  | <br><chem>[*]N(c(:[cH]:[*])):[c</chem><br><chem>H]:[*]</chem>           | -0.998 | 1 out of 13                         |



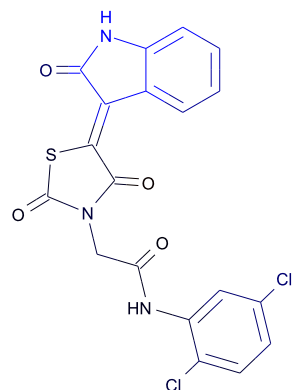

$C_{19}H_{11}Cl_2N_3O_4S$

Molecular Weight: 448.27933

ALogP: 3.028

Rotatable Bonds: 3

Acceptors: 5

Donors: 2

## Model Prediction

Prediction: Single-Carcinogen

Probability: 0.119

Enrichment: 0.395

Bayesian Score: -17.2

Mahalanobis Distance: 13.2

Mahalanobis Distance p-value: 7.44e-005

Prediction: Positive if the Bayesian score is above the estimated best cutoff value from minimizing the false positive and false negative rate.

Probability: The estimated probability that the sample is in the positive category. This assumes that the Bayesian score follows a normal distribution and is different from the prediction using a cutoff.

Enrichment: An estimate of enrichment, that is, the increased likelihood (versus random) of this sample being in the category.

Bayesian Score: The standard Laplacian-modified Bayesian score.

Mahalanobis Distance: The Mahalanobis distance (MD) is the distance to the center of the training data. The larger the MD, the less trustworthy the prediction.

Mahalanobis Distance p-value: The p-value gives the fraction of training data with an MD greater than or equal to the one for the given sample, assuming normally distributed data. The smaller the p-value, the less trustworthy the prediction. For highly non-normal X properties (e.g., fingerprints), the MD p-value is wildly inaccurate.

## Structural Similar Compounds

| Name               | Bicalutamide                                                        | Flunisolide                                                         | Phenolphthalein                                                     |
|--------------------|---------------------------------------------------------------------|---------------------------------------------------------------------|---------------------------------------------------------------------|
| Structure          |                                                                     |                                                                     |                                                                     |
| Actual Endpoint    | Single-Carcinogen                                                   | Single-Carcinogen                                                   | Multiple-Carcinogen                                                 |
| Predicted Endpoint | Single-Carcinogen                                                   | Single-Carcinogen                                                   | Multiple-Carcinogen                                                 |
| Distance           | 0.645                                                               | 0.730                                                               | 0.753                                                               |
| Reference          | US FDA (Centre for Drug Eval.& Res./Off. Testing & Res.) Sept. 1997 | US FDA (Centre for Drug Eval.& Res./Off. Testing & Res.) Sept. 1997 | US FDA (Centre for Drug Eval.& Res./Off. Testing & Res.) Sept. 1997 |

## Model Applicability

Unknown features are fingerprint features in the query molecule, but not found or appearing too infrequently in the training set.

1. All properties and OPS components are within expected ranges.

## Feature Contribution

### Top features for positive contribution

| Fingerprint | Bit/Smiles | Feature Structure                     | Score | Multiple-Carcinogen in training set |
|-------------|------------|---------------------------------------|-------|-------------------------------------|
| FCFP_12     | 565998553  | <br><chem>[*]N1[*][*]C(=O)C1=O</chem> | 0.194 | 6 out of 14                         |

### Top Features for negative contribution

| Fingerprint | Bit/Smiles | Feature Structure                                                                                                                                           | Score  | Multiple-Carcinogen in training set |
|-------------|------------|-------------------------------------------------------------------------------------------------------------------------------------------------------------|--------|-------------------------------------|
| FCFP_12     | 1294255210 | 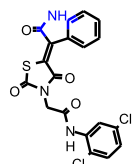<br><chem>[*]C(=[*])N[c](:[*]):</chem><br><chem>[*]</chem>               | -1.63  | 0 out of 12                         |
| FCFP_12     | 1175665944 | <br><chem>[*]C1=[*][c](:[*]):[c</chem><br><chem>](NC1=O):[cH]:[*]</chem> | -1.22  | 0 out of 7                          |
| FCFP_12     | 590925877  | <br><chem>[*]N[c](:[cH]:[*]):[c</chem><br><chem>H]:[*]</chem>            | -0.998 | 1 out of 13                         |

# Sorafenib

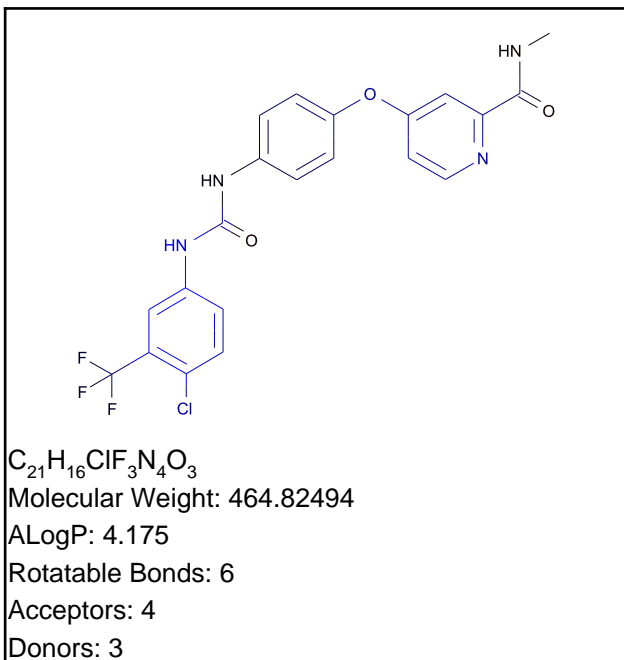

## Model Prediction

Prediction: Single-Carcinogen

Probability: 0.139

Enrichment: 0.461

Bayesian Score: -14.7

Mahalanobis Distance: 21.3

Mahalanobis Distance p-value: 4.93e-011

Prediction: Positive if the Bayesian score is above the estimated best cutoff value from minimizing the false positive and false negative rate.

Probability: The estimated probability that the sample is in the positive category. This assumes that the Bayesian score follows a normal distribution and is different from the prediction using a cutoff.

Enrichment: An estimate of enrichment, that is, the increased likelihood (versus random) of this sample being in the category.

Bayesian Score: The standard Laplacian-modified Bayesian score.

Mahalanobis Distance: The Mahalanobis distance (MD) is the distance to the center of the training data. The larger the MD, the less trustworthy the prediction.

Mahalanobis Distance p-value: The p-value gives the fraction of training data with an MD greater than or equal to the one for the given sample, assuming normally distributed data. The smaller the p-value, the less trustworthy the prediction. For highly non-normal X properties (e.g., fingerprints), the MD p-value is wildly inaccurate.

# TOPKAT\_Mouse\_Male\_FDA\_Single\_vs\_Multiple

## Structural Similar Compounds

| Name               | Glimepiride                                                                         | Bicalutamide                                                                        | Lansoprazole                                                                        |
|--------------------|-------------------------------------------------------------------------------------|-------------------------------------------------------------------------------------|-------------------------------------------------------------------------------------|
| Structure          | 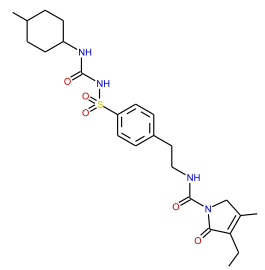 |  |  |
| Actual Endpoint    | Single-Carcinogen                                                                   | Single-Carcinogen                                                                   | Single-Carcinogen                                                                   |
| Predicted Endpoint | Single-Carcinogen                                                                   | Single-Carcinogen                                                                   | Single-Carcinogen                                                                   |
| Distance           | 0.626                                                                               | 0.700                                                                               | 0.866                                                                               |
| Reference          | US FDA (Centre for Drug Eval.& Res./Off. Testing & Res.) Sept. 1997                 | US FDA (Centre for Drug Eval.& Res./Off. Testing & Res.) Sept. 1997                 | US FDA (Centre for Drug Eval.& Res./Off. Testing & Res.) Sept. 1997                 |

## Model Applicability

Unknown features are fingerprint features in the query molecule, but not found or appearing too infrequently in the training set.

1. All properties and OPS components are within expected ranges.

## Feature Contribution

### Top features for positive contribution

| Fingerprint | Bit/Smiles | Feature Structure                                                                                      | Score | Multiple-Carcinogen in training set |
|-------------|------------|--------------------------------------------------------------------------------------------------------|-------|-------------------------------------|
| FCFP_12     | 1499521844 | 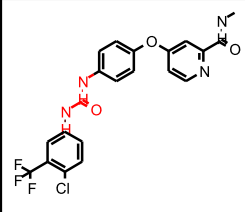<br>[*]NC(=O)N[*] | 0.39  | 5 out of 9                          |

|                                               |                   |                                                                                                                                    |              |                                            |
|-----------------------------------------------|-------------------|------------------------------------------------------------------------------------------------------------------------------------|--------------|--------------------------------------------|
| FCFP_12                                       | -904785030        | 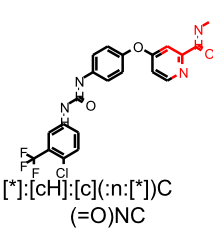<br>[*]:[cH]:[c](:n:[*])C<br>(=O)NC              | 0.174        | 1 out of 2                                 |
| FCFP_12                                       | -1549103449       | <br>[*]NC(=O)[c](:[*]):[*]<br>]                 | 0.168        | 3 out of 7                                 |
| <b>Top Features for negative contribution</b> |                   |                                                                                                                                    |              |                                            |
| <b>Fingerprint</b>                            | <b>Bit/Smiles</b> | <b>Feature Structure</b>                                                                                                           | <b>Score</b> | <b>Multiple-Carcinogen in training set</b> |
| FCFP_12                                       | 1294255210        | <br>[*]C(=[*])N[c](:[*]):<br>[*]                | -1.63        | 0 out of 12                                |
| FCFP_12                                       | 590925877         | <br>[*]N[c](:[cH]:[*]):[c<br>H]:[*]           | -0.998       | 1 out of 13                                |
| FCFP_12                                       | -1462709112       | <br>[*]C(=[*])[c]1:[cH]:[<br>*]:[cH]:[cH]:n:1 | -0.994       | 0 out of 5                                 |



10a

TOPKAT\_Ocular\_Irritancy\_Mild\_vs\_Moderate\_Severe

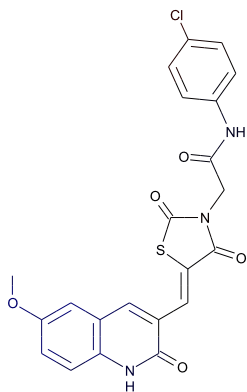C<sub>22</sub>H<sub>16</sub>ClN<sub>3</sub>O<sub>5</sub>S

Molecular Weight: 469.89753

ALogP: 2.815

Rotatable Bonds: 5

Acceptors: 6

Donors: 2

## Model Prediction

Prediction: Mild

Probability: 0.735

Enrichment: 1.07

Bayesian Score: -2.83

Mahalanobis Distance: 11.9

Mahalanobis Distance p-value: 0.000106

Prediction: Positive if the Bayesian score is above the estimated best cutoff value from minimizing the false positive and false negative rate.

Probability: The estimated probability that the sample is in the positive category. This assumes that the Bayesian score follows a normal distribution and is different from the prediction using a cutoff.

Enrichment: An estimate of enrichment, that is, the increased likelihood (versus random) of this sample being in the category.

Bayesian Score: The standard Laplacian-modified Bayesian score.

Mahalanobis Distance: The Mahalanobis distance (MD) is the distance to the center of the training data. The larger the MD, the less trustworthy the prediction.

Mahalanobis Distance p-value: The p-value gives the fraction of training data with an MD greater than or equal to the one for the given sample, assuming normally distributed data. The smaller the p-value, the less trustworthy the prediction. For highly non-normal X properties (e.g., fingerprints), the MD p-value is wildly inaccurate.

## Structural Similar Compounds

| Name               | 5-NORBORNENE-2;3-DICARBOXYLIC ACID; 1;4;5;6;7;7-HEXACHLORO- | ANTHRAQUINONE; 1-AMINO-4-HYDROXY-2-PHENOXY- | 4;4'-DIAMINO-1;1'-DIANTHRIMIDE |
|--------------------|-------------------------------------------------------------|---------------------------------------------|--------------------------------|
| Structure          |                                                             |                                             |                                |
| Actual Endpoint    | Moderate_Severe                                             | Mild                                        | Mild                           |
| Predicted Endpoint | Moderate_Severe                                             | Mild                                        | Mild                           |
| Distance           | 0.742                                                       | 0.745                                       | 0.751                          |
| Reference          | 28ZPAK-;92;72                                               | 28ZPAK 239;72                               | 28ZPAK-;125;72                 |

## Model Applicability

Unknown features are fingerprint features in the query molecule, but not found or appearing too infrequently in the training set.

- All properties and OPS components are within expected ranges.

## Feature Contribution

### Top features for positive contribution

| Fingerprint | Bit/Smiles  | Feature Structure                             | Score | Moderate_Severe in training set |
|-------------|-------------|-----------------------------------------------|-------|---------------------------------|
| FCFP_10     | -1508180856 | <br>[*][c]1:[cH]:[cH]:[c]<br>(Cl):[cH]:[cH]:1 | 0.329 | 16 out of 17                    |

|                                               |                   |                                                                                                                                                   |              |                                            |
|-----------------------------------------------|-------------------|---------------------------------------------------------------------------------------------------------------------------------------------------|--------------|--------------------------------------------|
| FCFP_10                                       | -745491832        | 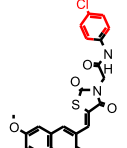<br>Cl[c]1:[cH]:[cH]:[*]:<br>[cH]:[cH]:1                       | 0.304        | 29 out of 32                               |
| FCFP_10                                       | 346218766         | <br>[*][c]1:[*]:[cH]:[cH]<br>:[c](OC):[cH]:1                   | 0.197        | 30 out of 37                               |
| <b>Top Features for negative contribution</b> |                   |                                                                                                                                                   |              |                                            |
| <b>Fingerprint</b>                            | <b>Bit/Smiles</b> | <b>Feature Structure</b>                                                                                                                          | <b>Score</b> | <b>Moderate_Severe<br/>in training set</b> |
| FCFP_10                                       | -1977641857       | <br>[*]:[cH]:[c](OC):[cH]<br>:[*]                              | -0.78        | 4 out of 15                                |
| FCFP_10                                       | 723745966         | <br>[*]O[c]1:[cH]:[cH]:[c]<br>]2NC(=[*])[*]=C[c]:2<br>:[cH]:1 | -0.507       | 0 out of 1                                 |
| FCFP_10                                       | -1757681964       | <br>[*][c]1:[cH]:[cH]:[c]<br>(OC):[cH]:[c]:1C=[*]            | -0.507       | 0 out of 1                                 |

10b

TOPKAT\_Ocular\_Irritancy\_Mild\_vs\_Moderate\_Severe

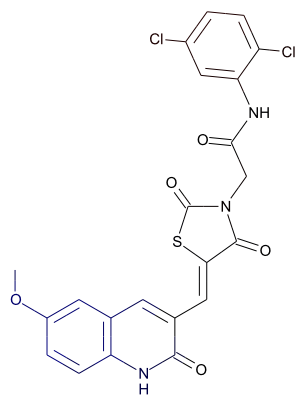C<sub>22</sub>H<sub>15</sub>Cl<sub>2</sub>N<sub>3</sub>O<sub>5</sub>S

Molecular Weight: 504.3426

ALogP: 3.479

Rotatable Bonds: 5

Acceptors: 6

Donors: 2

## Model Prediction

Prediction: Mild

Probability: 0.74

Enrichment: 1.07

Bayesian Score: -2.74

Mahalanobis Distance: 12.1

Mahalanobis Distance p-value: 4.02e-005

Prediction: Positive if the Bayesian score is above the estimated best cutoff value from minimizing the false positive and false negative rate.

Probability: The estimated probability that the sample is in the positive category. This assumes that the Bayesian score follows a normal distribution and is different from the prediction using a cutoff.

Enrichment: An estimate of enrichment, that is, the increased likelihood (versus random) of this sample being in the category.

Bayesian Score: The standard Laplacian-modified Bayesian score.

Mahalanobis Distance: The Mahalanobis distance (MD) is the distance to the center of the training data. The larger the MD, the less trustworthy the prediction.

Mahalanobis Distance p-value: The p-value gives the fraction of training data with an MD greater than or equal to the one for the given sample, assuming normally distributed data. The smaller the p-value, the less trustworthy the prediction. For highly non-normal X properties (e.g., fingerprints), the MD p-value is wildly inaccurate.

## Structural Similar Compounds

| Name               | 4;4'-DIAMINO-1;1'-DIANTHRIMIDE | 5-NORBORNENE-2;3-DICARBOXYLIC ACID; 1;4;5;6;7;7-HEXACHLORO- | ANTHRAQUINONE; 1-AMINO-4-HYDROXY-2-PHENOXY- |
|--------------------|--------------------------------|-------------------------------------------------------------|---------------------------------------------|
| Structure          |                                |                                                             |                                             |
| Actual Endpoint    | Mild                           | Moderate_Severe                                             | Mild                                        |
| Predicted Endpoint | Mild                           | Moderate_Severe                                             | Mild                                        |
| Distance           | 0.747                          | 0.790                                                       | 0.793                                       |
| Reference          | 28ZPAK-;125;72                 | 28ZPAK-;92;72                                               | 28ZPAK 239;72                               |

## Model Applicability

Unknown features are fingerprint features in the query molecule, but not found or appearing too infrequently in the training set.

- All properties and OPS components are within expected ranges.

## Feature Contribution

### Top features for positive contribution

| Fingerprint | Bit/Smiles | Feature Structure                    | Score | Moderate_Severe in training set |
|-------------|------------|--------------------------------------|-------|---------------------------------|
| FCFP_10     | -745491832 | <br>Cl[c]1:[cH]:[cH]:[*]:[cH]:[cH]:1 | 0.304 | 29 out of 32                    |



|                                               |                   |                                                                                                                                                    |              |                                            |
|-----------------------------------------------|-------------------|----------------------------------------------------------------------------------------------------------------------------------------------------|--------------|--------------------------------------------|
| FCFP_10                                       | 346218766         | 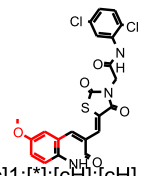<br>[*][c]1:[*]:[cH]:[cH]<br>:[c](OC):[cH]:1                    | 0.197        | 30 out of 37                               |
| FCFP_10                                       | 562194858         | <br>[*][c]1:[cH]:[c](Cl):<br>[cH]:[cH]:[c]:1Cl                  | 0.186        | 1 out of 1                                 |
| <b>Top Features for negative contribution</b> |                   |                                                                                                                                                    |              |                                            |
| <b>Fingerprint</b>                            | <b>Bit/Smiles</b> | <b>Feature Structure</b>                                                                                                                           | <b>Score</b> | <b>Moderate_Severe<br/>in training set</b> |
| FCFP_10                                       | -1977641857       | <br>[*]:[cH]:[c](OC):[cH]<br>:[*]                               | -0.78        | 4 out of 15                                |
| FCFP_10                                       | -1757681964       | <br>[*][c]1:[cH]:[cH]:[c]<br>(OC):[cH]:[c]:1C=[*]              | -0.507       | 0 out of 1                                 |
| FCFP_10                                       | 723745966         | <br>[*]O[c]1:[cH]:[cH]:[c]<br>]2NC(=[*])[*]=C[c]:2<br>:[cH]:1 | -0.507       | 0 out of 1                                 |

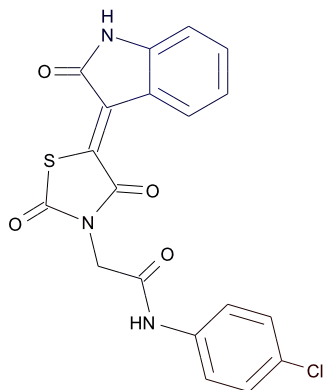

$C_{19}H_{12}ClN_3O_4S$

Molecular Weight: 413.83428

ALogP: 2.363

Rotatable Bonds: 3

Acceptors: 5

Donors: 2

## Model Prediction

Prediction: Mild

Probability: 0.787

Enrichment: 1.14

Bayesian Score: -1.47

Mahalanobis Distance: 11.2

Mahalanobis Distance p-value: 0.00241

Prediction: Positive if the Bayesian score is above the estimated best cutoff value from minimizing the false positive and false negative rate.

Probability: The estimated probability that the sample is in the positive category. This assumes that the Bayesian score follows a normal distribution and is different from the prediction using a cutoff.

Enrichment: An estimate of enrichment, that is, the increased likelihood (versus random) of this sample being in the category.

Bayesian Score: The standard Laplacian-modified Bayesian score.

Mahalanobis Distance: The Mahalanobis distance (MD) is the distance to the center of the training data. The larger the MD, the less trustworthy the prediction.

Mahalanobis Distance p-value: The p-value gives the fraction of training data with an MD greater than or equal to the one for the given sample, assuming normally distributed data. The smaller the p-value, the less trustworthy the prediction. For highly non-normal X properties (e.g., fingerprints), the MD p-value is wildly inaccurate.

## Structural Similar Compounds

| Name               | 1-AMINO-4-BENZOYLAMINO-ANTHRAQUINONE | 5-NORBORNENE-2;3-DICARBOXYLIC ACID; 1;4;5;6;7;7-HEXACHLORO- | ANTHRAQUINONE; 1-AMINO-4-HYDROXY-2-PHENOXY- |
|--------------------|--------------------------------------|-------------------------------------------------------------|---------------------------------------------|
| Structure          |                                      |                                                             |                                             |
| Actual Endpoint    | Mild                                 | Moderate_Severe                                             | Mild                                        |
| Predicted Endpoint | Mild                                 | Moderate_Severe                                             | Mild                                        |
| Distance           | 0.624                                | 0.630                                                       | 0.645                                       |
| Reference          | 28ZPAK-;124;72                       | 28ZPAK-;92;72                                               | 28ZPAK 239;72                               |

## Model Applicability

Unknown features are fingerprint features in the query molecule, but not found or appearing too infrequently in the training set.

- All properties and OPS components are within expected ranges.

## Feature Contribution

### Top features for positive contribution

| Fingerprint | Bit/Smiles  | Feature Structure                         | Score | Moderate_Severe in training set |
|-------------|-------------|-------------------------------------------|-------|---------------------------------|
| FCFP_10     | -1508180856 | <br>[*][c]1:[cH]:[cH]:[c](Cl):[cH]:[cH]:1 | 0.329 | 16 out of 17                    |

|                                               |                   |                                                                                                                                                |              |                                        |
|-----------------------------------------------|-------------------|------------------------------------------------------------------------------------------------------------------------------------------------|--------------|----------------------------------------|
| FCFP_10                                       | -745491832        | 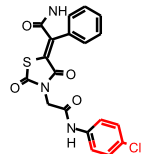<br><chem>Cl[c]1:[cH]:[cH]:[*]:[cH]:[cH]:1</chem>           | 0.304        | 29 out of 32                           |
| FCFP_10                                       | -175681259        | <br><chem>[*]N[c]1:[cH]:[cH]:[c](Cl):[cH]:[cH]:1</chem>     | 0.186        | 1 out of 1                             |
| <b>Top Features for negative contribution</b> |                   |                                                                                                                                                |              |                                        |
| <b>Fingerprint</b>                            | <b>Bit/Smiles</b> | <b>Feature Structure</b>                                                                                                                       | <b>Score</b> | <b>Moderate_Severe in training set</b> |
| FCFP_10                                       | 1011367537        | <br><chem>[*]=C1[*]=C[c]2:[cH]:[*]:[cH]:[cH]:[c]:2N1</chem> | -0.329       | 4 out of 9                             |
| FCFP_10                                       | -773983804        | <br><chem>[*]N[c]1:[cH]:[*]:[c]([*]):[cH]:[cH]:1</chem>    | -0.294       | 50 out of 102                          |
| FCFP_10                                       | -1698724694       | <br><chem>[*]=C1[*][*][c]2:[cH]:[cH]:[cH]:[c]1:2</chem>   | -0.284       | 53 out of 107                          |

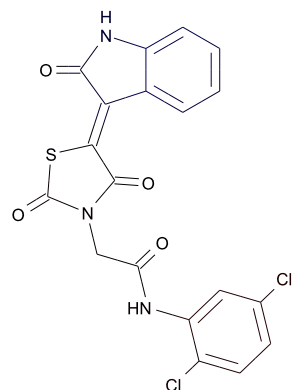

$C_{19}H_{11}Cl_2N_3O_4S$

Molecular Weight: 448.27933

ALogP: 3.028

Rotatable Bonds: 3

Acceptors: 5

Donors: 2

## Model Prediction

Prediction: Mild

Probability: 0.793

Enrichment: 1.15

Bayesian Score: -1.28

Mahalanobis Distance: 11.3

Mahalanobis Distance p-value: 0.00136

Prediction: Positive if the Bayesian score is above the estimated best cutoff value from minimizing the false positive and false negative rate.

Probability: The estimated probability that the sample is in the positive category. This assumes that the Bayesian score follows a normal distribution and is different from the prediction using a cutoff.

Enrichment: An estimate of enrichment, that is, the increased likelihood (versus random) of this sample being in the category.

Bayesian Score: The standard Laplacian-modified Bayesian score.

Mahalanobis Distance: The Mahalanobis distance (MD) is the distance to the center of the training data. The larger the MD, the less trustworthy the prediction.

Mahalanobis Distance p-value: The p-value gives the fraction of training data with an MD greater than or equal to the one for the given sample, assuming normally distributed data. The smaller the p-value, the less trustworthy the prediction. For highly non-normal X properties (e.g., fingerprints), the MD p-value is wildly inaccurate.

## Structural Similar Compounds

| Name               | 5-NORBORNENE-2;3-DICARBOXYLIC ACID; 1;4;5;6;7;7-HEXACHLORO- | 1-AMINO-4-BENZOYLAMINO-ANTHRAQUINONE | ANTHRAQUINONE; 1-AMINO-4-HYDROXY-2-PHENOXY- |
|--------------------|-------------------------------------------------------------|--------------------------------------|---------------------------------------------|
| Structure          |                                                             |                                      |                                             |
| Actual Endpoint    | Moderate_Severe                                             | Mild                                 | Mild                                        |
| Predicted Endpoint | Moderate_Severe                                             | Mild                                 | Mild                                        |
| Distance           | 0.652                                                       | 0.658                                | 0.669                                       |
| Reference          | 28ZPAK-;92;72                                               | 28ZPAK-;124;72                       | 28ZPAK 239;72                               |

## Model Applicability

Unknown features are fingerprint features in the query molecule, but not found or appearing too infrequently in the training set.

- All properties and OPS components are within expected ranges.

## Feature Contribution

### Top features for positive contribution

| Fingerprint | Bit/Smiles | Feature Structure                                 | Score | Moderate_Severe in training set |
|-------------|------------|---------------------------------------------------|-------|---------------------------------|
| FCFP_10     | -745491832 | <br><chem>Cl[c]1:[cH]:[cH]:[*]:[cH]:[cH]:1</chem> | 0.304 | 29 out of 32                    |

|                                               |                   |                                                                                                                                                |              |                                        |
|-----------------------------------------------|-------------------|------------------------------------------------------------------------------------------------------------------------------------------------|--------------|----------------------------------------|
| FCFP_10                                       | 562194858         | 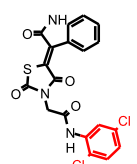<br><chem>[*][c]1:[cH]:[c](Cl):[cH]:[cH]:[c]:1Cl</chem>     | 0.186        | 1 out of 1                             |
| FCFP_10                                       | 3                 | <br><chem>[*]N[*]</chem>                                    | 0.165        | 383 out of 491                         |
| <b>Top Features for negative contribution</b> |                   |                                                                                                                                                |              |                                        |
| <b>Fingerprint</b>                            | <b>Bit/Smiles</b> | <b>Feature Structure</b>                                                                                                                       | <b>Score</b> | <b>Moderate_Severe in training set</b> |
| FCFP_10                                       | 1011367537        | <br><chem>[*]=C1[*]=C[c]2:[cH]:[*]:[cH]:[cH]:[c]:2N1</chem> | -0.329       | 4 out of 9                             |
| FCFP_10                                       | -773983804        | <br><chem>[*]N[c]1:[cH]:[*]:[c]([*]):[cH]:[cH]:1</chem>    | -0.294       | 50 out of 102                          |
| FCFP_10                                       | -1698724694       | <br><chem>[*]=C1[*][*][c]2:[cH]:[cH]:[cH]:[c]1:2</chem>   | -0.284       | 53 out of 107                          |

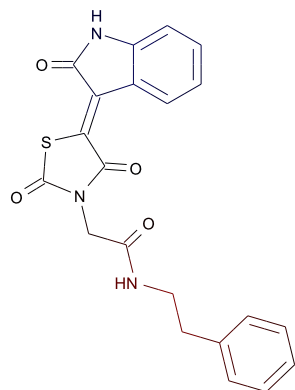

$C_{21}H_{17}N_3O_4S$

Molecular Weight: 407.44237

ALogP: 2.027

Rotatable Bonds: 5

Acceptors: 5

Donors: 2

### Model Prediction

Prediction: **Moderate\_Severe**

Probability: 0.831

Enrichment: 1.21

Bayesian Score: 0.573

Mahalanobis Distance: 11

Mahalanobis Distance p-value: 0.00418

Prediction: Positive if the Bayesian score is above the estimated best cutoff value from minimizing the false positive and false negative rate.

Probability: The estimated probability that the sample is in the positive category. This assumes that the Bayesian score follows a normal distribution and is different from the prediction using a cutoff.

Enrichment: An estimate of enrichment, that is, the increased likelihood (versus random) of this sample being in the category.

Bayesian Score: The standard Laplacian-modified Bayesian score.

Mahalanobis Distance: The Mahalanobis distance (MD) is the distance to the center of the training data. The larger the MD, the less trustworthy the prediction.

Mahalanobis Distance p-value: The p-value gives the fraction of training data with an MD greater than or equal to the one for the given sample, assuming normally distributed data. The smaller the p-value, the less trustworthy the prediction. For highly non-normal X properties (e.g., fingerprints), the MD p-value is wildly inaccurate.

### Structural Similar Compounds

| Name               | 1-AMINO-4-BENZOYLAMINO-ANTHRAQUINONE | 5-NORBORNENE-2;3-DICARBOXYLIC ACID; 1;4;5;6;7;7-HEXACHLORO- | ANTHRAQUINONE; 1-AMINO-4-HYDROXY-2-PHENOXY- |
|--------------------|--------------------------------------|-------------------------------------------------------------|---------------------------------------------|
| Structure          |                                      |                                                             |                                             |
| Actual Endpoint    | Mild                                 | Moderate_Severe                                             | Mild                                        |
| Predicted Endpoint | Mild                                 | Moderate_Severe                                             | Mild                                        |
| Distance           | 0.637                                | 0.648                                                       | 0.668                                       |
| Reference          | 28ZPAK-;124;72                       | 28ZPAK-;92;72                                               | 28ZPAK 239;72                               |

### Model Applicability

Unknown features are fingerprint features in the query molecule, but not found or appearing too infrequently in the training set.

- All properties and OPS components are within expected ranges.

### Feature Contribution

#### Top features for positive contribution

| Fingerprint | Bit/Smiles | Feature Structure                       | Score | Moderate_Severe in training set |
|-------------|------------|-----------------------------------------|-------|---------------------------------|
| FCFP_10     | -497728148 | <br>[*]CC[c]1:[cH]:[cH]:[*]:[cH]:[cH]:1 | 0.356 | 24 out of 25                    |

|                                               |                   |                                                                                                                                              |              |                                        |
|-----------------------------------------------|-------------------|----------------------------------------------------------------------------------------------------------------------------------------------|--------------|----------------------------------------|
| FCFP_10                                       | -547731249        | 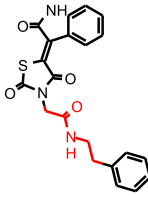<br>[*]CCNC(=O)C[*]                                       | 0.294        | 3 out of 3                             |
| FCFP_10                                       | -1272709286       | <br>[*]CCN[*]                                             | 0.285        | 234 out of 266                         |
| <b>Top Features for negative contribution</b> |                   |                                                                                                                                              |              |                                        |
| <b>Fingerprint</b>                            | <b>Bit/Smiles</b> | <b>Feature Structure</b>                                                                                                                     | <b>Score</b> | <b>Moderate_Severe in training set</b> |
| FCFP_10                                       | 1011367537        | <br>[*]=C1[*]=C[c]2:[cH]:<br>[*]:[cH]:[cH]:[c]:2N<br>1    | -0.329       | 4 out of 9                             |
| FCFP_10                                       | -773983804        | <br>[*]N[c]1:[cH]:[*]:[c]<br>([*]):[cH]:[cH]:1           | -0.294       | 50 out of 102                          |
| FCFP_10                                       | -1698724694       | <br>[*]=C1[*][*][c]2:[cH]<br>:[cH]:[cH]:[cH]:[c]1<br>:2 | -0.284       | 53 out of 107                          |

# Sorafenib

# TOPKAT\_Ocular\_Irritancy\_Mild\_vs\_Moderate\_Severe

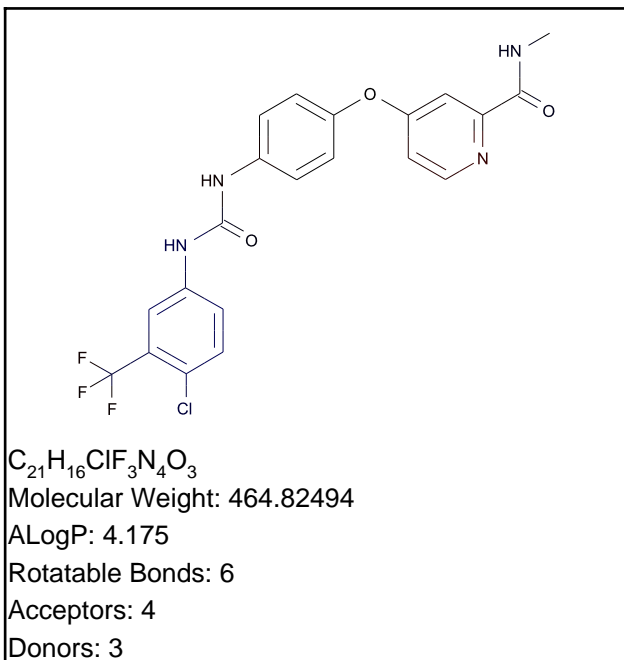

## Model Prediction

Prediction: Mild

Probability: 0.776

Enrichment: 1.13

Bayesian Score: -1.8

Mahalanobis Distance: 8.95

Mahalanobis Distance p-value: 0.537

Prediction: Positive if the Bayesian score is above the estimated best cutoff value from minimizing the false positive and false negative rate.

Probability: The estimated probability that the sample is in the positive category. This assumes that the Bayesian score follows a normal distribution and is different from the prediction using a cutoff.

Enrichment: An estimate of enrichment, that is, the increased likelihood (versus random) of this sample being in the category.

Bayesian Score: The standard Laplacian-modified Bayesian score.

Mahalanobis Distance: The Mahalanobis distance (MD) is the distance to the center of the training data. The larger the MD, the less trustworthy the prediction.

Mahalanobis Distance p-value: The p-value gives the fraction of training data with an MD greater than or equal to the one for the given sample, assuming normally distributed data. The smaller the p-value, the less trustworthy the prediction. For highly non-normal X properties (e.g., fingerprints), the MD p-value is wildly inaccurate.

## Structural Similar Compounds

| Name               | 4;4'-DIAMINO-1;1'-DIANTHRIMIDE                                                      | 5-NORBORNENE-2;3-DICARBOXYLIC ACID; 1;4;5;6;7;7-HEXACHLORO-                         | METHANE;TRIS(4-AMINOPHENYL)-                                                        |
|--------------------|-------------------------------------------------------------------------------------|-------------------------------------------------------------------------------------|-------------------------------------------------------------------------------------|
| Structure          | 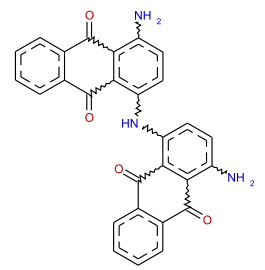 |  |  |
| Actual Endpoint    | Mild                                                                                | Moderate_Severe                                                                     | Moderate_Severe                                                                     |
| Predicted Endpoint | Mild                                                                                | Moderate_Severe                                                                     | Moderate_Severe                                                                     |
| Distance           | 0.799                                                                               | 0.816                                                                               | 0.827                                                                               |
| Reference          | 28ZPAK-;125;72                                                                      | 28ZPAK-;92;72                                                                       | 28ZPAK-;73;72                                                                       |

## Model Applicability

Unknown features are fingerprint features in the query molecule, but not found or appearing too infrequently in the training set.

- All properties and OPS components are within expected ranges.

## Feature Contribution

### Top features for positive contribution

| Fingerprint | Bit/Smiles  | Feature Structure                                                                                                           | Score | Moderate_Severe in training set |
|-------------|-------------|-----------------------------------------------------------------------------------------------------------------------------|-------|---------------------------------|
| FCFP_10     | -1695756380 | 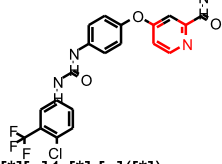<br>[*][c]1:[*]:[c]([*]):n:[cH]:[cH]:1 | 0.285 | 10 out of 11                    |



|                                               |                   |                                                                                                                                                                 |              |                                        |
|-----------------------------------------------|-------------------|-----------------------------------------------------------------------------------------------------------------------------------------------------------------|--------------|----------------------------------------|
| FCFP_10                                       | -124655670        | 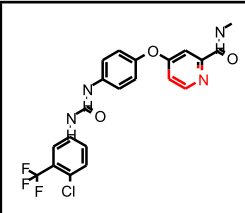<br><chem>[*]:[cH]:[cH]:n:[*]</chem>                                          | 0.259        | 14 out of 16                           |
| FCFP_10                                       | -885550502        | <br><chem>[*]CNC(=[*])[*]</chem>                                             | 0.239        | 54 out of 64                           |
| <b>Top Features for negative contribution</b> |                   |                                                                                                                                                                 |              |                                        |
| <b>Fingerprint</b>                            | <b>Bit/Smiles</b> | <b>Feature Structure</b>                                                                                                                                        | <b>Score</b> | <b>Moderate_Severe in training set</b> |
| FCFP_10                                       | 2104062943        | <br><chem>[*]C([*])([*])[c]1:[cH]:[*]:[cH]:[cH]:[c]:1Cl</chem>               | -0.745       | 7 out of 24                            |
| FCFP_10                                       | -174293376        | <br><chem>[*]N([c]([*])[cH]:[cH]:[c](Cl):[c](-[cH]:1)C([*])([*])[*])</chem> | -0.507       | 0 out of 1                             |
| FCFP_10                                       | -1549103449       | <br><chem>[*]NC(=O)[c]([*]):[*]</chem>                                     | -0.504       | 2 out of 6                             |

# Sunitinib

# TOPKAT\_Ocular\_Irritancy\_Mild\_vs\_Moderate\_Severe

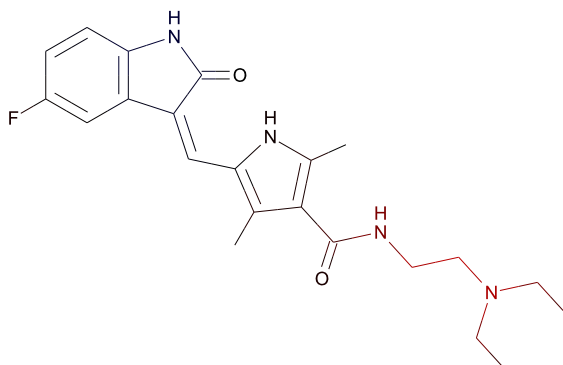

C<sub>22</sub>H<sub>27</sub>FN<sub>4</sub>O<sub>2</sub>

Molecular Weight: 398.47378

ALogP: 2.997

Rotatable Bonds: 7

Acceptors: 3

Donors: 3

## Model Prediction

Prediction: Moderate\_Severe

Probability: 0.893

Enrichment: 1.3

Bayesian Score: 3.24

Mahalanobis Distance: 11.1

Mahalanobis Distance p-value: 0.00304

Prediction: Positive if the Bayesian score is above the estimated best cutoff value from minimizing the false positive and false negative rate.

Probability: The estimated probability that the sample is in the positive category. This assumes that the Bayesian score follows a normal distribution and is different from the prediction using a cutoff.

Enrichment: An estimate of enrichment, that is, the increased likelihood (versus random) of this sample being in the category.

Bayesian Score: The standard Laplacian-modified Bayesian score.

Mahalanobis Distance: The Mahalanobis distance (MD) is the distance to the center of the training data. The larger the MD, the less trustworthy the prediction.

Mahalanobis Distance p-value: The p-value gives the fraction of training data with an MD greater than or equal to the one for the given sample, assuming normally distributed data. The smaller the p-value, the less trustworthy the prediction. For highly non-normal X properties (e.g., fingerprints), the MD p-value is wildly inaccurate.

## Structural Similar Compounds

| Name               | METHANE;TRIS(4-AMINOPHENYL)- | ANTHRAQUINONE; 1-((2-HYDROXYETHYL)AMINO)-4-(METHYLAMINO)- | 1-AMINO-4-BENZOYLAMINO-ANTHRAQUINONE |
|--------------------|------------------------------|-----------------------------------------------------------|--------------------------------------|
| Structure          |                              |                                                           |                                      |
| Actual Endpoint    | Moderate_Severe              | Mild                                                      | Mild                                 |
| Predicted Endpoint | Moderate_Severe              | Mild                                                      | Mild                                 |
| Distance           | 0.713                        | 0.770                                                     | 0.786                                |
| Reference          | 28ZPAK-;73;72                | 28ZPAK 245;72                                             | 28ZPAK-;124;72                       |

## Model Applicability

Unknown features are fingerprint features in the query molecule, but not found or appearing too infrequently in the training set.

- All properties and OPS components are within expected ranges.
- Unknown FCFP\_2 feature: 203707511: [\*][c]1:[\*]:[\*]:[nH]:[c]:1C=[\*]

## Feature Contribution

### Top features for positive contribution

| Fingerprint | Bit/Smiles | Feature Structure | Score | Moderate_Severe in training set |
|-------------|------------|-------------------|-------|---------------------------------|
| FCFP_10     | 1851332093 | <br>[*]CN(C[*])CC | 0.376 | 12 out of 12                    |

|                                               |                   |                                                                                                                                                 |              |                                        |
|-----------------------------------------------|-------------------|-------------------------------------------------------------------------------------------------------------------------------------------------|--------------|----------------------------------------|
| FCFP_10                                       | -371808660        | 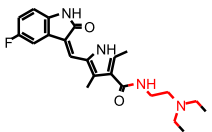<br><chem>[*]CN(C[*])CCN[*]</chem>                           | 0.338        | 18 out of 19                           |
| FCFP_10                                       | -587569116        | <br><chem>[*]CCN([*])[*]</chem>                              | 0.335        | 66 out of 71                           |
| <b>Top Features for negative contribution</b> |                   |                                                                                                                                                 |              |                                        |
| <b>Fingerprint</b>                            | <b>Bit/Smiles</b> | <b>Feature Structure</b>                                                                                                                        | <b>Score</b> | <b>Moderate_Severe in training set</b> |
| FCFP_10                                       | -1549103449       | <br><chem>[*]NC(=O)[c](:[*]):[*]</chem>                      | -0.504       | 2 out of 6                             |
| FCFP_10                                       | 1011367537        | <br><chem>[*]=C1[*]=C[c]2:[cH]:[*]:[cH]:[cH]:[c]:2N</chem> | -0.329       | 4 out of 9                             |
| FCFP_10                                       | -773983804        | <br><chem>[*]N[c]1:[cH]:[*]:[c]([*]):[cH]:[cH]:1</chem>    | -0.294       | 50 out of 102                          |

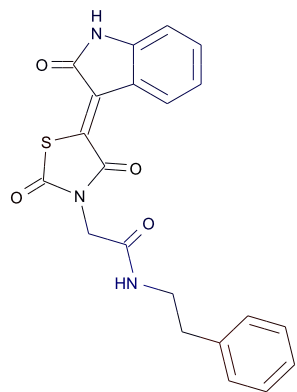

$C_{21}H_{17}N_3O_4S$

Molecular Weight: 407.44237

ALogP: 2.027

Rotatable Bonds: 5

Acceptors: 5

Donors: 2

## Model Prediction

Prediction: Moderate

Probability: 0.557

Enrichment: 0.898

Bayesian Score: -3.1

Mahalanobis Distance: 10.1

Mahalanobis Distance p-value: 0.0339

Prediction: Positive if the Bayesian score is above the estimated best cutoff value from minimizing the false positive and false negative rate.

Probability: The estimated probability that the sample is in the positive category. This assumes that the Bayesian score follows a normal distribution and is different from the prediction using a cutoff.

Enrichment: An estimate of enrichment, that is, the increased likelihood (versus random) of this sample being in the category.

Bayesian Score: The standard Laplacian-modified Bayesian score.

Mahalanobis Distance: The Mahalanobis distance (MD) is the distance to the center of the training data. The larger the MD, the less trustworthy the prediction.

Mahalanobis Distance p-value: The p-value gives the fraction of training data with an MD greater than or equal to the one for the given sample, assuming normally distributed data. The smaller the p-value, the less trustworthy the prediction. For highly non-normal X properties (e.g., fingerprints), the MD p-value is wildly inaccurate.

## Structural Similar Compounds

| Name               | 5-NORBORNENE-2;3-DICARBOXYLIC ACID; 1;4;5;6;7;7-HEXACHLORO- | 2-NAPHTHALENESULFONIC ACID;5-AMINO-6-ETHOXY- | PHENOL; 4;4'-SULFONYLDI- |
|--------------------|-------------------------------------------------------------|----------------------------------------------|--------------------------|
| Structure          |                                                             |                                              |                          |
| Actual Endpoint    | Severe                                                      | Moderate                                     | Moderate                 |
| Predicted Endpoint | Severe                                                      | Moderate                                     | Moderate                 |
| Distance           | 0.643                                                       | 0.754                                        | 0.794                    |
| Reference          | 28ZPAK-;92;72                                               | 28ZPAK-;191;72                               | BIOFX* 601-05501;74      |

## Model Applicability

Unknown features are fingerprint features in the query molecule, but not found or appearing too infrequently in the training set.

- All properties and OPS components are within expected ranges.

## Feature Contribution

### Top features for positive contribution

| Fingerprint | Bit/Smiles  | Feature Structure                                          | Score | Severe in training set |
|-------------|-------------|------------------------------------------------------------|-------|------------------------|
| SCFP_12     | -1640858361 | <br><chem>[*]CC[c]1:[cH]:[cH]:[cH]:[cH]:[cH]:[cH]:1</chem> | 0.376 | 4 out of 4             |

|                                               |                   |                                                                                                                                              |              |                               |
|-----------------------------------------------|-------------------|----------------------------------------------------------------------------------------------------------------------------------------------|--------------|-------------------------------|
| SCFP_12                                       | -1272709286       | 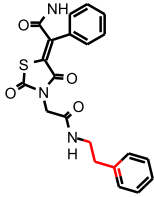<br><chem>[*]CC[c](:[*]):[*]</chem>                       | 0.231        | 24 out of 31                  |
| SCFP_12                                       | 2102703671        | <br><chem>[*]=C1C(=O)N(c)([cH]:[*])[c]1[*]</chem>         | 0.218        | 1 out of 1                    |
| <b>Top Features for negative contribution</b> |                   |                                                                                                                                              |              |                               |
| <b>Fingerprint</b>                            | <b>Bit/Smiles</b> | <b>Feature Structure</b>                                                                                                                     | <b>Score</b> | <b>Severe in training set</b> |
| SCFP_12                                       | 2005026407        | <br><chem>[*]CCNC(=O)C[*]</chem>                          | -0.796       | 0 out of 2                    |
| SCFP_12                                       | 1655488245        | <br><chem>[*]1[*][c]2:[cH]:[cH]:[cH]:[cH]:[c]:2N1</chem> | -0.796       | 0 out of 2                    |
| SCFP_12                                       | -587569116        | <br><chem>[*]CCN[*]</chem>                              | -0.619       | 11 out of 35                  |

# Sunitinib

# TOPKAT\_Ocular\_Irritancy\_Moderate\_vs\_Severe

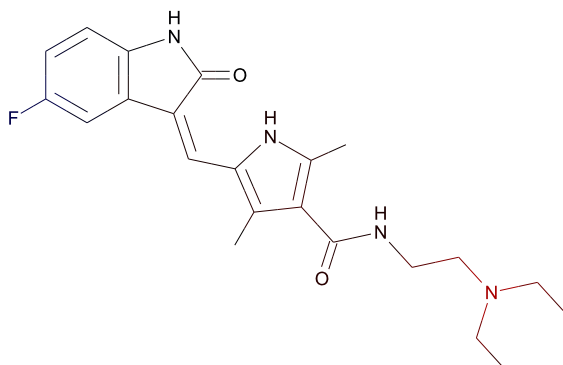

C<sub>22</sub>H<sub>27</sub>FN<sub>4</sub>O<sub>2</sub>

Molecular Weight: 398.47378

ALogP: 2.997

Rotatable Bonds: 7

Acceptors: 3

Donors: 3

## Model Prediction

Prediction: Severe

Probability: 0.714

Enrichment: 1.15

Bayesian Score: 0.743

Mahalanobis Distance: 11.7

Mahalanobis Distance p-value: 7.58e-005

Prediction: Positive if the Bayesian score is above the estimated best cutoff value from minimizing the false positive and false negative rate.

Probability: The estimated probability that the sample is in the positive category. This assumes that the Bayesian score follows a normal distribution and is different from the prediction using a cutoff.

Enrichment: An estimate of enrichment, that is, the increased likelihood (versus random) of this sample being in the category.

Bayesian Score: The standard Laplacian-modified Bayesian score.

Mahalanobis Distance: The Mahalanobis distance (MD) is the distance to the center of the training data. The larger the MD, the less trustworthy the prediction.

Mahalanobis Distance p-value: The p-value gives the fraction of training data with an MD greater than or equal to the one for the given sample, assuming normally distributed data. The smaller the p-value, the less trustworthy the prediction. For highly non-normal X properties (e.g., fingerprints), the MD p-value is wildly inaccurate.

## Structural Similar Compounds

| Name               | METHANE;TRIS(4-AMINOPHENYL)- | 5-NORBORNENE-2;3-DICARBOXYLIC ACID;1;4;5;6;7;7-HEXACHLORO- | FLUORENE-9;9-(BIS)PROPYLAMINE |
|--------------------|------------------------------|------------------------------------------------------------|-------------------------------|
| Structure          |                              |                                                            |                               |
| Actual Endpoint    | Moderate                     | Severe                                                     | Severe                        |
| Predicted Endpoint | Moderate                     | Severe                                                     | Severe                        |
| Distance           | 0.726                        | 0.793                                                      | 0.804                         |
| Reference          | 28ZPAK-;73;72                | 28ZPAK-;92;72                                              | IHFCA Y 6;1;67                |

## Model Applicability

Unknown features are fingerprint features in the query molecule, but not found or appearing too infrequently in the training set.

- All properties and OPS components are within expected ranges.

## Feature Contribution

### Top features for positive contribution

| Fingerprint | Bit/Smiles | Feature Structure | Score | Severe in training set |
|-------------|------------|-------------------|-------|------------------------|
| SCFP_12     | 1725890097 | <br>[*]CN(C[*])CC | 0.449 | 12 out of 12           |

|                                               |                   |                                                                                                                             |              |                               |
|-----------------------------------------------|-------------------|-----------------------------------------------------------------------------------------------------------------------------|--------------|-------------------------------|
| SCFP_12                                       | 2088704928        | 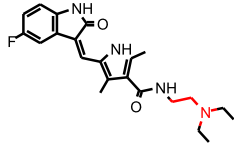<br>[*]CCN[*]N[*]                        | 0.342        | 110 out of 128                |
| SCFP_12                                       | 5                 | <br>[*]N[*]N[*]                          | 0.337        | 129 out of 151                |
| <b>Top Features for negative contribution</b> |                   |                                                                                                                             |              |                               |
| <b>Fingerprint</b>                            | <b>Bit/Smiles</b> | <b>Feature Structure</b>                                                                                                    | <b>Score</b> | <b>Severe in training set</b> |
| SCFP_12                                       | -587569116        | <br>[*]CCN[*]                            | -0.619       | 11 out of 35                  |
| SCFP_12                                       | -1381307546       | <br>[*][c]1:[*]:[cH]:[c](F):[cH]:[cH]:1 | -0.345       | 1 out of 3                    |
| SCFP_12                                       | -1794884847       | <br>[*]:[c]:[*]F                       | -0.345       | 1 out of 3                    |

10a

TOPKAT\_Ocular\_Irritancy\_None\_vs\_Irritant

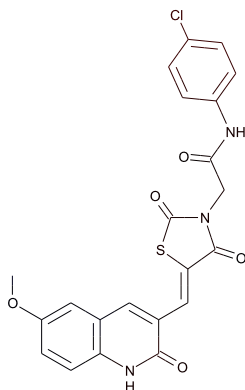C<sub>22</sub>H<sub>16</sub>ClN<sub>3</sub>O<sub>5</sub>S

Molecular Weight: 469.89753

ALogP: 2.815

Rotatable Bonds: 5

Acceptors: 6

Donors: 2

## Model Prediction

Prediction: Irritant

Probability: 1

Enrichment: 1.18

Bayesian Score: 2.29

Mahalanobis Distance: 11.7

Mahalanobis Distance p-value: 0.000301

Prediction: Positive if the Bayesian score is above the estimated best cutoff value from minimizing the false positive and false negative rate.

Probability: The estimated probability that the sample is in the positive category. This assumes that the Bayesian score follows a normal distribution and is different from the prediction using a cutoff.

Enrichment: An estimate of enrichment, that is, the increased likelihood (versus random) of this sample being in the category.

Bayesian Score: The standard Laplacian-modified Bayesian score.

Mahalanobis Distance: The Mahalanobis distance (MD) is the distance to the center of the training data. The larger the MD, the less trustworthy the prediction.

Mahalanobis Distance p-value: The p-value gives the fraction of training data with an MD greater than or equal to the one for the given sample, assuming normally distributed data. The smaller the p-value, the less trustworthy the prediction. For highly non-normal X properties (e.g., fingerprints), the MD p-value is wildly inaccurate.

## Structural Similar Compounds

| Name               | 5-NORBORNENE-2;3-DICARBOXYLIC ACID; 1;4;5;6;7;7-HEXACHLORO- | ANTHRAQUINONE; 1-AMINO-4-HYDROXY-2-PHENOXY- | 4;4'-DIAMINO-1;1'-DIANTHRIMIDE |
|--------------------|-------------------------------------------------------------|---------------------------------------------|--------------------------------|
| Structure          |                                                             |                                             |                                |
| Actual Endpoint    | Irritant                                                    | Irritant                                    | Irritant                       |
| Predicted Endpoint | Irritant                                                    | Irritant                                    | Irritant                       |
| Distance           | 0.731                                                       | 0.732                                       | 0.746                          |
| Reference          | 28ZPAK-;92;72                                               | 28ZPAK 239;72                               | 28ZPAK-;125;72                 |

## Model Applicability

Unknown features are fingerprint features in the query molecule, but not found or appearing too infrequently in the training set.

- All properties and OPS components are within expected ranges.

## Feature Contribution

### Top features for positive contribution

| Fingerprint | Bit/Smiles  | Feature Structure                             | Score | Irritant in training set |
|-------------|-------------|-----------------------------------------------|-------|--------------------------|
| FCFP_12     | -1508180856 | <br>[*][c]1:[cH]:[cH]:[c]<br>(Cl):[cH]:[cH]:1 | 0.2   | 17 out of 17             |



|                                               |                   |                                                                                                                                                                          |              |                                 |
|-----------------------------------------------|-------------------|--------------------------------------------------------------------------------------------------------------------------------------------------------------------------|--------------|---------------------------------|
| FCFP_12                                       | 1175665944        | 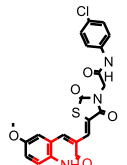<br><chem>[*]C1=[*][c]([*]):[c]([*]):[c]([*])</chem><br><chem>(NC1=O):[cH]:[*]</chem> | 0.198        | 14 out of 14                    |
| FCFP_12                                       | -745491832        | <br><chem>Cl[c]1:[cH]:[cH]:[*]:</chem><br><chem>[cH]:[cH]:1</chem>                    | 0.177        | 32 out of 33                    |
| <b>Top Features for negative contribution</b> |                   |                                                                                                                                                                          |              |                                 |
| <b>Fingerprint</b>                            | <b>Bit/Smiles</b> | <b>Feature Structure</b>                                                                                                                                                 | <b>Score</b> | <b>Irritant in training set</b> |
| FCFP_12                                       | -1060187936       | <br><chem>[*]N[c]1:[cH]:[cH]:[c]([*])</chem><br><chem>(OC):[cH]:[c]:1[*]</chem>       | -0.344       | 2 out of 4                      |
| FCFP_12                                       | -1757681964       | <br><chem>[*][c]1:[cH]:[cH]:[c]([*])</chem><br><chem>(OC):[cH]:[c]:1C=[*]</chem>     | -0.268       | 1 out of 2                      |
| FCFP_12                                       | 451371068         | <br><chem>[*]C(=C[c]([*]):[*])</chem><br><chem>[*]</chem>                           | -0.167       | 6 out of 9                      |

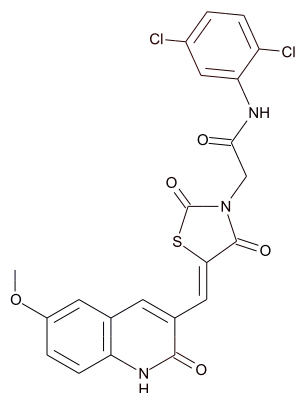

$C_{22}H_{15}Cl_2N_3O_5S$

Molecular Weight: 504.3426

ALogP: 3.479

Rotatable Bonds: 5

Acceptors: 6

Donors: 2

## Model Prediction

**Prediction: Irritant**

Probability: 1

Enrichment: 1.18

Bayesian Score: 1.99

Mahalanobis Distance: 11.9

Mahalanobis Distance p-value: 0.000107

Prediction: Positive if the Bayesian score is above the estimated best cutoff value from minimizing the false positive and false negative rate.

Probability: The estimated probability that the sample is in the positive category. This assumes that the Bayesian score follows a normal distribution and is different from the prediction using a cutoff.

Enrichment: An estimate of enrichment, that is, the increased likelihood (versus random) of this sample being in the category.

Bayesian Score: The standard Laplacian-modified Bayesian score.

Mahalanobis Distance: The Mahalanobis distance (MD) is the distance to the center of the training data. The larger the MD, the less trustworthy the prediction.

Mahalanobis Distance p-value: The p-value gives the fraction of training data with an MD greater than or equal to the one for the given sample, assuming normally distributed data. The smaller the p-value, the less trustworthy the prediction. For highly non-normal X properties (e.g., fingerprints), the MD p-value is wildly inaccurate.

## Structural Similar Compounds

| Name               | 4;4'-DIAMINO-1;1'-DIANTHRIMIDE | 5-NORBORNENE-2;3-DICARBOXYLIC ACID; 1;4;5;6;7;7-HEXACHLORO- | BENZANILIDE;2';2'''-DITHIOBIS- |
|--------------------|--------------------------------|-------------------------------------------------------------|--------------------------------|
| Structure          |                                |                                                             |                                |
| Actual Endpoint    | Irritant                       | Irritant                                                    | Non-Irritant                   |
| Predicted Endpoint | Irritant                       | Irritant                                                    | Non-Irritant                   |
| Distance           | 0.744                          | 0.774                                                       | 0.775                          |
| Reference          | 28ZPAK-;125;72                 | 28ZPAK-;92;72                                               | 28ZPAK-;173;72                 |

## Model Applicability

Unknown features are fingerprint features in the query molecule, but not found or appearing too infrequently in the training set.

- All properties and OPS components are within expected ranges.

## Feature Contribution

### Top features for positive contribution

| Fingerprint | Bit/Smiles | Feature Structure                             | Score | Irritant in training set |
|-------------|------------|-----------------------------------------------|-------|--------------------------|
| FCFP_12     | 1175665944 | <br>[*]C1=[*][c]([*]):[c]([*])NC1=O):[cH]:[*] | 0.198 | 14 out of 14             |

|                                               |                   |                                                                                                                                        |              |                                 |
|-----------------------------------------------|-------------------|----------------------------------------------------------------------------------------------------------------------------------------|--------------|---------------------------------|
| FCFP_12                                       | -770645118        | 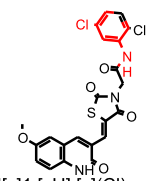<br>[*]N[c]1:[cH]:[c](Cl)<br>:[cH]:[*]:[c]:1[*]     | 0.184        | 7 out of 7                      |
| FCFP_12                                       | -745491832        | <br>Cl[c]1:[cH]:[cH]:[*]:<br>[cH]:[cH]:1            | 0.177        | 32 out of 33                    |
| <b>Top Features for negative contribution</b> |                   |                                                                                                                                        |              |                                 |
| <b>Fingerprint</b>                            | <b>Bit/Smiles</b> | <b>Feature Structure</b>                                                                                                               | <b>Score</b> | <b>Irritant in training set</b> |
| FCFP_12                                       | -1060187936       | <br>[*]N[c]1:[cH]:[cH]:[c<br>) (OC):[cH]:[c]:1[*]   | -0.344       | 2 out of 4                      |
| FCFP_12                                       | -1757681964       | <br>[*][c]1:[cH]:[cH]:[c<br>) (OC):[cH]:[c]:1C=[*] | -0.268       | 1 out of 2                      |
| FCFP_12                                       | 451371068         | <br>[*]C(=C[c](:[*]):[*])<br>[*]                  | -0.167       | 6 out of 9                      |

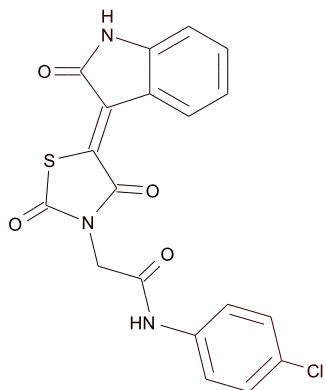

$C_{19}H_{12}ClN_3O_4S$

Molecular Weight: 413.83428

ALogP: 2.363

Rotatable Bonds: 3

Acceptors: 5

Donors: 2

## Model Prediction

**Prediction: Irritant**

Probability: 1

Enrichment: 1.18

Bayesian Score: 2.71

Mahalanobis Distance: 8.42

Mahalanobis Distance p-value: 0.8

Prediction: Positive if the Bayesian score is above the estimated best cutoff value from minimizing the false positive and false negative rate.

Probability: The estimated probability that the sample is in the positive category. This assumes that the Bayesian score follows a normal distribution and is different from the prediction using a cutoff.

Enrichment: An estimate of enrichment, that is, the increased likelihood (versus random) of this sample being in the category.

Bayesian Score: The standard Laplacian-modified Bayesian score.

Mahalanobis Distance: The Mahalanobis distance (MD) is the distance to the center of the training data. The larger the MD, the less trustworthy the prediction.

Mahalanobis Distance p-value: The p-value gives the fraction of training data with an MD greater than or equal to the one for the given sample, assuming normally distributed data. The smaller the p-value, the less trustworthy the prediction. For highly non-normal X properties (e.g., fingerprints), the MD p-value is wildly inaccurate.

## Structural Similar Compounds

| Name               | 1-AMINO-4-BENZOYLAMINO-ANTHRAQUINONE | 5-NORBORNENE-2;3-DICARBOXYLIC ACID; 1;4;5;6;7;7-HEXACHLORO- | ANTHRAQUINONE; 1-AMINO-4-HYDROXY-2-PHENOXY- |
|--------------------|--------------------------------------|-------------------------------------------------------------|---------------------------------------------|
| Structure          |                                      |                                                             |                                             |
| Actual Endpoint    | Irritant                             | Irritant                                                    | Irritant                                    |
| Predicted Endpoint | Irritant                             | Irritant                                                    | Irritant                                    |
| Distance           | 0.621                                | 0.628                                                       | 0.635                                       |
| Reference          | 28ZPAK-;124;72                       | 28ZPAK-;92;72                                               | 28ZPAK 239;72                               |

## Model Applicability

Unknown features are fingerprint features in the query molecule, but not found or appearing too infrequently in the training set.

- All properties and OPS components are within expected ranges.

## Feature Contribution

### Top features for positive contribution

| Fingerprint | Bit/Smiles  | Feature Structure                         | Score | Irritant in training set |
|-------------|-------------|-------------------------------------------|-------|--------------------------|
| FCFP_12     | -1508180856 | <br>[*][c]1:[cH]:[cH]:[c](Cl):[cH]:[cH]:1 | 0.2   | 17 out of 17             |

|                                               |                   |                                                                                                                                                 |              |                                 |
|-----------------------------------------------|-------------------|-------------------------------------------------------------------------------------------------------------------------------------------------|--------------|---------------------------------|
| FCFP_12                                       | 1175665944        | 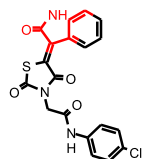<br><chem>[*]C1=[*][c(:[*]):[c](NC1=O):[cH]:[*]</chem>       | 0.198        | 14 out of 14                    |
| FCFP_12                                       | -745491832        | <br><chem>Cl[c]1:[cH]:[cH]:[*]:[cH]:[cH]:1</chem>            | 0.177        | 32 out of 33                    |
| <b>Top Features for negative contribution</b> |                   |                                                                                                                                                 |              |                                 |
| <b>Fingerprint</b>                            | <b>Bit/Smiles</b> | <b>Feature Structure</b>                                                                                                                        | <b>Score</b> | <b>Irritant in training set</b> |
| FCFP_12                                       | -1698724694       | <br><chem>[*]=C1[*][*][c]2:[cH]:[cH]:[cH]:[cH]:[c]1:2</chem> | -0.0964      | 107 out of 146                  |
| FCFP_12                                       | 565998553         | <br><chem>[*]N1[*][*]C(=[*])C1=O</chem>                     | -0.0662      | 198 out of 262                  |
| FCFP_12                                       | -1678275541       | <br><chem>[*]C(=C1C(=[*])[*][*]:[c]1:[*])[*]</chem>        | -0.0561      | 3 out of 4                      |

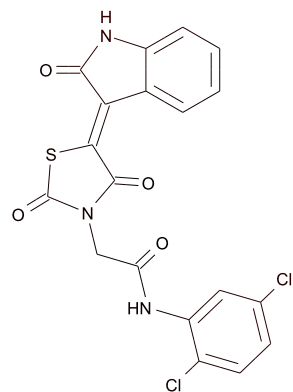

$C_{19}H_{11}Cl_2N_3O_4S$

Molecular Weight: 448.27933

ALogP: 3.028

Rotatable Bonds: 3

Acceptors: 5

Donors: 2

## Model Prediction

**Prediction: Irritant**

Probability: 1

Enrichment: 1.18

Bayesian Score: 2.4

Mahalanobis Distance: 8.64

Mahalanobis Distance p-value: 0.699

Prediction: Positive if the Bayesian score is above the estimated best cutoff value from minimizing the false positive and false negative rate.

Probability: The estimated probability that the sample is in the positive category. This assumes that the Bayesian score follows a normal distribution and is different from the prediction using a cutoff.

Enrichment: An estimate of enrichment, that is, the increased likelihood (versus random) of this sample being in the category.

Bayesian Score: The standard Laplacian-modified Bayesian score.

Mahalanobis Distance: The Mahalanobis distance (MD) is the distance to the center of the training data. The larger the MD, the less trustworthy the prediction.

Mahalanobis Distance p-value: The p-value gives the fraction of training data with an MD greater than or equal to the one for the given sample, assuming normally distributed data. The smaller the p-value, the less trustworthy the prediction. For highly non-normal X properties (e.g., fingerprints), the MD p-value is wildly inaccurate.

## Structural Similar Compounds

| Name               | 5-NORBORNENE-2;3-DICARBOXYLIC ACID; 1;4;5;6;7;7-HEXACHLORO- | 1-AMINO-4-BENZOYLAMINO-ANTHRAQUINONE | ANTHRAQUINONE; 1-AMINO-4-HYDROXY-2-PHENOXY- |
|--------------------|-------------------------------------------------------------|--------------------------------------|---------------------------------------------|
| Structure          |                                                             |                                      |                                             |
| Actual Endpoint    | Irritant                                                    | Irritant                             | Irritant                                    |
| Predicted Endpoint | Irritant                                                    | Irritant                             | Irritant                                    |
| Distance           | 0.646                                                       | 0.652                                | 0.660                                       |
| Reference          | 28ZPAK-;92;72                                               | 28ZPAK-;124;72                       | 28ZPAK 239;72                               |

## Model Applicability

Unknown features are fingerprint features in the query molecule, but not found or appearing too infrequently in the training set.

- All properties and OPS components are within expected ranges.

## Feature Contribution

### Top features for positive contribution

| Fingerprint | Bit/Smiles | Feature Structure                                       | Score | Irritant in training set |
|-------------|------------|---------------------------------------------------------|-------|--------------------------|
| FCFP_12     | 1175665944 | <br><chem>[*]C1=[*][c](:[*]):[c](NC1=O):[cH]:[*]</chem> | 0.198 | 14 out of 14             |

|                                               |                   |                                                                                                                                                      |              |                                 |
|-----------------------------------------------|-------------------|------------------------------------------------------------------------------------------------------------------------------------------------------|--------------|---------------------------------|
| FCFP_12                                       | -770645118        | 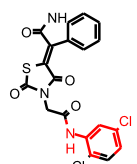<br><chem>[*]N(c1:[cH]:[c](Cl):[cH]:[*]):[cH]:[*]:[c]:1[*]</chem> | 0.184        | 7 out of 7                      |
| FCFP_12                                       | -745491832        | <br><chem>Cl[c]1:[cH]:[cH]:[*]:[cH]:[cH]:1</chem>                 | 0.177        | 32 out of 33                    |
| <b>Top Features for negative contribution</b> |                   |                                                                                                                                                      |              |                                 |
| <b>Fingerprint</b>                            | <b>Bit/Smiles</b> | <b>Feature Structure</b>                                                                                                                             | <b>Score</b> | <b>Irritant in training set</b> |
| FCFP_12                                       | -1698724694       | <br><chem>[*]=C1[*][*][c]2:[cH]:[cH]:[cH]:[c]1:2</chem>           | -0.0964      | 107 out of 146                  |
| FCFP_12                                       | 565998553         | <br><chem>[*]N1[*][*]C(=[*])C1=O</chem>                          | -0.0662      | 198 out of 262                  |
| FCFP_12                                       | -1678275541       | <br><chem>[*]C=C1C(=[*])[*][*]:[c]1:[*][*]</chem>               | -0.0561      | 3 out of 4                      |

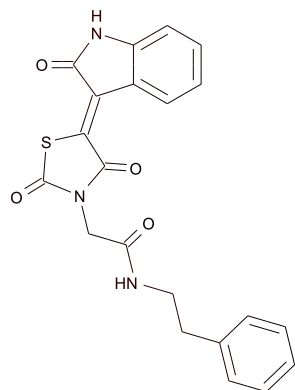

$C_{21}H_{17}N_3O_4S$

Molecular Weight: 407.44237

ALogP: 2.027

Rotatable Bonds: 5

Acceptors: 5

Donors: 2

## Model Prediction

**Prediction: Irritant**

Probability: 1

Enrichment: 1.18

Bayesian Score: 2.12

Mahalanobis Distance: 8.94

Mahalanobis Distance p-value: 0.546

Prediction: Positive if the Bayesian score is above the estimated best cutoff value from minimizing the false positive and false negative rate.

Probability: The estimated probability that the sample is in the positive category. This assumes that the Bayesian score follows a normal distribution and is different from the prediction using a cutoff.

Enrichment: An estimate of enrichment, that is, the increased likelihood (versus random) of this sample being in the category.

Bayesian Score: The standard Laplacian-modified Bayesian score.

Mahalanobis Distance: The Mahalanobis distance (MD) is the distance to the center of the training data. The larger the MD, the less trustworthy the prediction.

Mahalanobis Distance p-value: The p-value gives the fraction of training data with an MD greater than or equal to the one for the given sample, assuming normally distributed data. The smaller the p-value, the less trustworthy the prediction. For highly non-normal X properties (e.g., fingerprints), the MD p-value is wildly inaccurate.

## Structural Similar Compounds

| Name               | 1-AMINO-4-BENZOYLAMINO-ANTHRAQUINONE | 5-NORBORNENE-2;3-DICARBOXYLIC ACID; 1;4;5;6;7;7-HEXACHLORO- | ANTHRAQUINONE; 1-AMINO-4-HYDROXY-2-PHENOXY- |
|--------------------|--------------------------------------|-------------------------------------------------------------|---------------------------------------------|
| Structure          |                                      |                                                             |                                             |
| Actual Endpoint    | Irritant                             | Irritant                                                    | Irritant                                    |
| Predicted Endpoint | Irritant                             | Irritant                                                    | Irritant                                    |
| Distance           | 0.629                                | 0.641                                                       | 0.653                                       |
| Reference          | 28ZPAK-;124;72                       | 28ZPAK-;92;72                                               | 28ZPAK 239;72                               |

## Model Applicability

Unknown features are fingerprint features in the query molecule, but not found or appearing too infrequently in the training set.

- All properties and OPS components are within expected ranges.

## Feature Contribution

### Top features for positive contribution

| Fingerprint | Bit/Smiles | Feature Structure                                       | Score | Irritant in training set |
|-------------|------------|---------------------------------------------------------|-------|--------------------------|
| FCFP_12     | 1175665944 | <br><chem>[*]C1=[*][c](:[*]):[c](NC1=O):[cH]:[*]</chem> | 0.198 | 14 out of 14             |



|                                               |                   |                                                                                                                                                  |              |                                 |
|-----------------------------------------------|-------------------|--------------------------------------------------------------------------------------------------------------------------------------------------|--------------|---------------------------------|
| FCFP_12                                       | -885550502        | 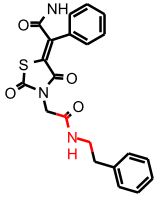<br><chem>[*]CNC(=[*])[*]</chem>                              | 0.18         | 64 out of 66                    |
| FCFP_12                                       | 436915834         | <br><chem>[*]C=C1/S[*][*]C1=[*]</chem>                        | 0.167        | 4 out of 4                      |
| <b>Top Features for negative contribution</b> |                   |                                                                                                                                                  |              |                                 |
| <b>Fingerprint</b>                            | <b>Bit/Smiles</b> | <b>Feature Structure</b>                                                                                                                         | <b>Score</b> | <b>Irritant in training set</b> |
| FCFP_12                                       | 1981711554        | <br><chem>[*]CC[c]1:[cH]:[cH]:[cH]:[cH]:[cH]:[cH]:1</chem>    | -0.103       | 5 out of 7                      |
| FCFP_12                                       | -1698724694       | <br><chem>[*]=C1[*][*][c]2:[cH]:[cH]:[cH]:[cH]:[c]1:2</chem> | -0.0964      | 107 out of 146                  |
| FCFP_12                                       | 565998553         | <br><chem>[*]N1[*][*]C(=[*])C1=O</chem>                     | -0.0662      | 198 out of 262                  |

# Sorafenib

# TOPKAT\_Ocular\_Irritancy\_None\_vs\_Irritant

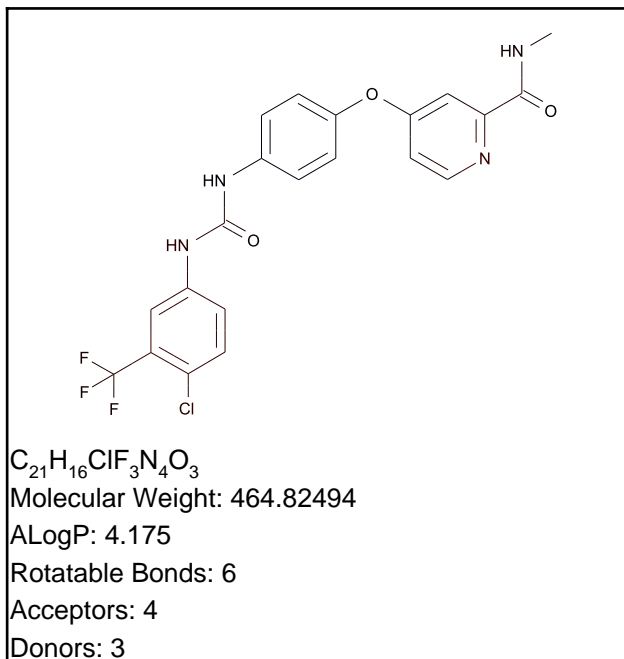

## Model Prediction

**Prediction: Irritant**

Probability: 1

Enrichment: 1.18

Bayesian Score: 3.04

Mahalanobis Distance: 6.28

Mahalanobis Distance p-value: 1

Prediction: Positive if the Bayesian score is above the estimated best cutoff value from minimizing the false positive and false negative rate.

Probability: The estimated probability that the sample is in the positive category. This assumes that the Bayesian score follows a normal distribution and is different from the prediction using a cutoff.

Enrichment: An estimate of enrichment, that is, the increased likelihood (versus random) of this sample being in the category.

Bayesian Score: The standard Laplacian-modified Bayesian score.

Mahalanobis Distance: The Mahalanobis distance (MD) is the distance to the center of the training data. The larger the MD, the less trustworthy the prediction.

Mahalanobis Distance p-value: The p-value gives the fraction of training data with an MD greater than or equal to the one for the given sample, assuming normally distributed data. The smaller the p-value, the less trustworthy the prediction. For highly non-normal X properties (e.g., fingerprints), the MD p-value is wildly inaccurate.

## Structural Similar Compounds

| Name               | BENZANILIDE;2';2'''-DITHIOBIS-                                                      | 4;4'-DIAMINO-1;1'-DIANTHRIMIDE                                                      | 5-NORBORNENE-2;3-DICARBOXYLIC ACID;1;4;5;6;7;7'-HEXACHLORO-                         |
|--------------------|-------------------------------------------------------------------------------------|-------------------------------------------------------------------------------------|-------------------------------------------------------------------------------------|
| Structure          | 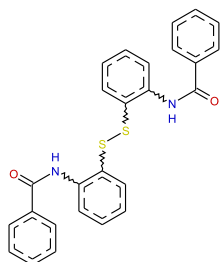 |  |  |
| Actual Endpoint    | Non-Irritant                                                                        | Irritant                                                                            | Irritant                                                                            |
| Predicted Endpoint | Non-Irritant                                                                        | Irritant                                                                            | Irritant                                                                            |
| Distance           | 0.743                                                                               | 0.791                                                                               | 0.801                                                                               |
| Reference          | 28ZPAK-;173;72                                                                      | 28ZPAK-;125;72                                                                      | 28ZPAK-;92;72                                                                       |

## Model Applicability

Unknown features are fingerprint features in the query molecule, but not found or appearing too infrequently in the training set.

- All properties and OPS components are within expected ranges.

## Feature Contribution

### Top features for positive contribution

| Fingerprint | Bit/Smiles | Feature Structure                                                                                                | Score | Irritant in training set |
|-------------|------------|------------------------------------------------------------------------------------------------------------------|-------|--------------------------|
| FCFP_12     | 1747237384 | 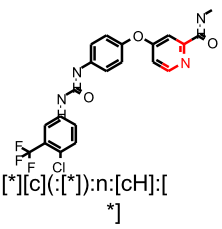<br>[*][c](:[*]):n:[cH]:[*] | 0.208 | 44 out of 44             |

|                                               |                   |                                                                                                                                                                           |              |                                 |
|-----------------------------------------------|-------------------|---------------------------------------------------------------------------------------------------------------------------------------------------------------------------|--------------|---------------------------------|
| FCFP_12                                       | -124655670        | 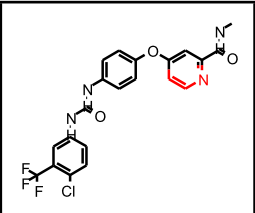<br>[*]:[cH]:[cH]:n:[*]                                                                 | 0.2          | 16 out of 16                    |
| FCFP_12                                       | -1539132615       | <br>[*]C(=[*])[c](-[cH]:[*]):n:[*]                                                     | 0.197        | 13 out of 13                    |
| <b>Top Features for negative contribution</b> |                   |                                                                                                                                                                           |              |                                 |
| <b>Fingerprint</b>                            | <b>Bit/Smiles</b> | <b>Feature Structure</b>                                                                                                                                                  | <b>Score</b> | <b>Irritant in training set</b> |
| FCFP_12                                       | -747629521        | <br>[*]N([c]f:[cH]:[cH]:[c])<br>[O][c](-[*]):[*]:[c]<br>H]:[cH]:1                      | -0.268       | 1 out of 2                      |
| FCFP_12                                       | 702861189         | <br>[*]N([c]1[cH]:[cH]:[c])<br>[O][c]2:[cH]:[cH]:[*]<br>]:[c]([*]):[cH]:2:[cH]:[cH]:1 | -0.268       | 1 out of 2                      |
| FCFP_12                                       | -1597477966       | <br>[*]:[cH]:[c](O)[c]([c]<br>H]:[*]):[cH]:[*]:[c]<br>H]:[*]                         | 0            | 9 out of 11                     |

# Sunitinib

# TOPKAT\_Ocular\_Irritancy\_None\_vs\_Irritant

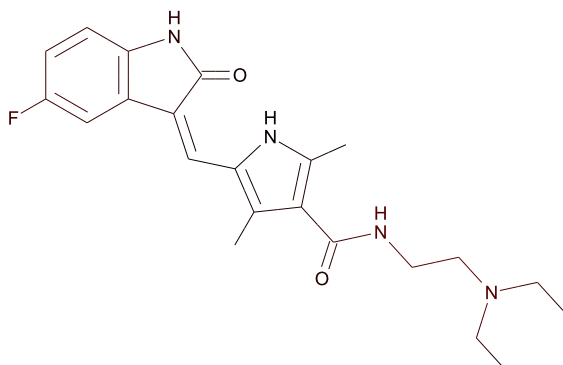

C<sub>22</sub>H<sub>27</sub>FN<sub>4</sub>O<sub>2</sub>

Molecular Weight: 398.47378

ALogP: 2.997

Rotatable Bonds: 7

Acceptors: 3

Donors: 3

## Model Prediction

**Prediction: Irritant**

Probability: 1

Enrichment: 1.18

Bayesian Score: 4.17

Mahalanobis Distance: 8.04

Mahalanobis Distance p-value: 0.916

Prediction: Positive if the Bayesian score is above the estimated best cutoff value from minimizing the false positive and false negative rate.

Probability: The estimated probability that the sample is in the positive category. This assumes that the Bayesian score follows a normal distribution and is different from the prediction using a cutoff.

Enrichment: An estimate of enrichment, that is, the increased likelihood (versus random) of this sample being in the category.

Bayesian Score: The standard Laplacian-modified Bayesian score.

Mahalanobis Distance: The Mahalanobis distance (MD) is the distance to the center of the training data. The larger the MD, the less trustworthy the prediction.

Mahalanobis Distance p-value: The p-value gives the fraction of training data with an MD greater than or equal to the one for the given sample, assuming normally distributed data. The smaller the p-value, the less trustworthy the prediction. For highly non-normal X properties (e.g., fingerprints), the MD p-value is wildly inaccurate.

## Structural Similar Compounds

| Name               | METHANE;TRIS(4-AMINOPHENYL)- | ANTHRAQUINONE; 1-((2-HYDROXYETHYL)AMINO)-4-(METHYLAMINO)- | PHENOL;4-(3-CARBAZOLYLAMINO)- |
|--------------------|------------------------------|-----------------------------------------------------------|-------------------------------|
| Structure          |                              |                                                           |                               |
| Actual Endpoint    | Irritant                     | Irritant                                                  | Irritant                      |
| Predicted Endpoint | Irritant                     | Irritant                                                  | Irritant                      |
| Distance           | 0.704                        | 0.757                                                     | 0.773                         |
| Reference          | 28ZPAK-;73;72                | 28ZPAK 245;72                                             | 28ZPAK-;143;72                |

## Model Applicability

Unknown features are fingerprint features in the query molecule, but not found or appearing too infrequently in the training set.

- All properties and OPS components are within expected ranges.
- Unknown FCFP\_2 feature: 203707511: [\*][c]1:[\*]:[\*]:[nH]:[c]:1C=[\*]

## Feature Contribution

### Top features for positive contribution

| Fingerprint | Bit/Smiles | Feature Structure                          | Score | Irritant in training set |
|-------------|------------|--------------------------------------------|-------|--------------------------|
| FCFP_12     | 1175665944 | <br>[*]C1=[*][c](:[*]):[c](NC1=O):[cH]:[*] | 0.198 | 14 out of 14             |

| FCFP_12                                | 1851332093  | 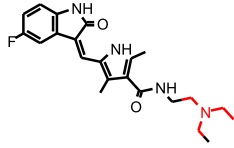   | 0.195   | 12 out of 12             |
|----------------------------------------|-------------|---------------------------------------------------------------------------------------|---------|--------------------------|
|                                        |             | <chem>[*]CN(C[*])CC</chem>                                                            |         |                          |
| FCFP_12                                | -885550502  |    | 0.18    | 64 out of 66             |
|                                        |             | <chem>[*]CNC(=[*])[*]</chem>                                                          |         |                          |
| Top Features for negative contribution |             |                                                                                       |         |                          |
| Fingerprint                            | Bit/Smiles  | Feature Structure                                                                     | Score   | Irritant in training set |
| FCFP_12                                | 451371068   |    | -0.167  | 6 out of 9               |
|                                        |             | <chem>[*]C=C[c](:[*]):[*]</chem><br><chem>[*]</chem>                                  |         |                          |
| FCFP_12                                | -1678275541 |   | -0.0561 | 3 out of 4               |
|                                        |             | <chem>[*]C(=C1C(=[*])[*])</chem><br><chem>:e]1:[*])[*]</chem>                         |         |                          |
| FCFP_12                                | 0           |  | 0       | 1184 out of 1397         |
|                                        |             | <chem>[*]C=[*]</chem>                                                                 |         |                          |

10a

TOPKAT\_Rat\_Female\_FDA\_None\_vs\_Carcinogen

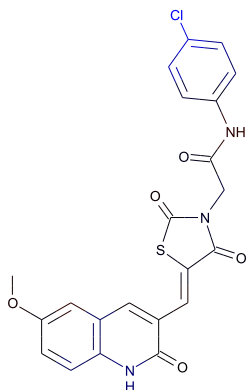C<sub>22</sub>H<sub>16</sub>ClN<sub>3</sub>O<sub>5</sub>S

Molecular Weight: 469.89753

ALogP: 2.815

Rotatable Bonds: 5

Acceptors: 6

Donors: 2

### Model Prediction

Prediction: Non-Carcinogen

Probability: 0.21

Enrichment: 0.652

Bayesian Score: -6.08

Mahalanobis Distance: 11.2

Mahalanobis Distance p-value: 0.0452

Prediction: Positive if the Bayesian score is above the estimated best cutoff value from minimizing the false positive and false negative rate.

Probability: The estimated probability that the sample is in the positive category. This assumes that the Bayesian score follows a normal distribution and is different from the prediction using a cutoff.

Enrichment: An estimate of enrichment, that is, the increased likelihood (versus random) of this sample being in the category. Bayesian Score: The standard Laplacian-modified Bayesian score.

Mahalanobis Distance: The Mahalanobis distance (MD) is the distance to the center of the training data. The larger the MD, the less trustworthy the prediction.

Mahalanobis Distance p-value: The p-value gives the fraction of training data with an MD greater than or equal to the one for the given sample, assuming normally distributed data. The smaller the p-value, the less trustworthy the prediction. For highly non-normal X properties (e.g., fingerprints), the MD p-value is wildly inaccurate.

### Structural Similar Compounds

| Name               | Bicalutamide                                                        | Carbenicillin                                                       | Polythiazide                                                        |
|--------------------|---------------------------------------------------------------------|---------------------------------------------------------------------|---------------------------------------------------------------------|
| Structure          |                                                                     |                                                                     |                                                                     |
| Actual Endpoint    | Carcinogen                                                          | Non-Carcinogen                                                      | Non-Carcinogen                                                      |
| Predicted Endpoint | Carcinogen                                                          | Non-Carcinogen                                                      | Non-Carcinogen                                                      |
| Distance           | 0.599                                                               | 0.641                                                               | 0.644                                                               |
| Reference          | US FDA (Centre for Drug Eval.& Res./Off. Testing & Res.) Sept. 1997 | US FDA (Centre for Drug Eval.& Res./Off. Testing & Res.) Sept. 1997 | US FDA (Centre for Drug Eval.& Res./Off. Testing & Res.) Sept. 1997 |

### Model Applicability

Unknown features are fingerprint features in the query molecule, but not found or appearing too infrequently in the training set.

1. All properties and OPS components are within expected ranges.
2. Unknown ECFP\_2 feature: 2131425032: [\*]\C=C(\C=[\*])/C(=[\*])[\*]
3. Unknown ECFP\_2 feature: 1182722866: [\*]C(=CC(=[\*])[\*])[\*]
4. Unknown ECFP\_2 feature: 1000552169: [\*]\C=C\1/S[\*][\*]C1=[\*]
5. Unknown ECFP\_2 feature: 190445529: [\*]N1[\*][\*]SC1=O

### Feature Contribution

#### Top features for positive contribution

| Fingerprint | Bit/Smiles | Feature Structure               | Score | Carcinogen in training set |
|-------------|------------|---------------------------------|-------|----------------------------|
| ECFP_12     | 177077903  | <br>[*]N[c](:[cH]:[*]):[cH]:[*] | 0.529 | 6 out of 10                |

|                                               |                   |                                                                                                                                                             |              |                                   |
|-----------------------------------------------|-------------------|-------------------------------------------------------------------------------------------------------------------------------------------------------------|--------------|-----------------------------------|
| ECFP_12                                       | -1236483485       | 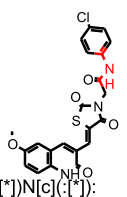<br><chem>[*]C(=[*])N(c(:[*])):</chem><br><chem>[*]</chem>               | 0.46         | 9 out of 17                       |
| ECFP_12                                       | 888054369         | <br><chem>[*]N(c1:[cH]:[*]):[c]</chem><br><chem>([*]):[cH]:[cH]:1</chem> | 0.454        | 5 out of 9                        |
| <b>Top Features for negative contribution</b> |                   |                                                                                                                                                             |              |                                   |
| <b>Fingerprint</b>                            | <b>Bit/Smiles</b> | <b>Feature Structure</b>                                                                                                                                    | <b>Score</b> | <b>Carcinogen in training set</b> |
| ECFP_12                                       | 1335833675        | <br><chem>[*]N(c(:[cH]:[*]))3:[c</chem><br><chem>)([*]):[*]</chem>       | -1.25        | 0 out of 8                        |
| ECFP_12                                       | 99947387          | <br><chem>[*]:[c](:[*])Cl</chem>                                        | -0.817       | 8 out of 62                       |
| ECFP_12                                       | 1854732111        | <br><chem>[*][c]1:[*]:[cH]:[c](</chem><br><chem>Cl):[cH]:[cH]:1</chem> | -0.816       | 4 out of 33                       |

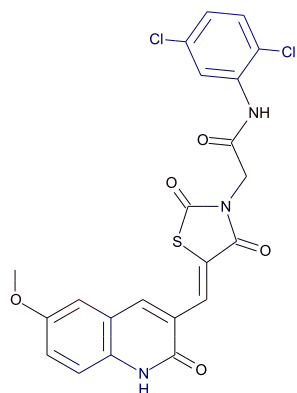

$C_{22}H_{15}Cl_2N_3O_5S$

Molecular Weight: 504.3426

ALogP: 3.479

Rotatable Bonds: 5

Acceptors: 6

Donors: 2

## Model Prediction

Prediction: Non-Carcinogen

Probability: 0.206

Enrichment: 0.639

Bayesian Score: -6.52

Mahalanobis Distance: 11.4

Mahalanobis Distance p-value: 0.0271

Prediction: Positive if the Bayesian score is above the estimated best cutoff value from minimizing the false positive and false negative rate.

Probability: The estimated probability that the sample is in the positive category. This assumes that the Bayesian score follows a normal distribution and is different from the prediction using a cutoff.

Enrichment: An estimate of enrichment, that is, the increased likelihood (versus random) of this sample being in the category. Bayesian Score: The standard Laplacian-modified Bayesian score.

Mahalanobis Distance: The Mahalanobis distance (MD) is the distance to the center of the training data. The larger the MD, the less trustworthy the prediction.

Mahalanobis Distance p-value: The p-value gives the fraction of training data with an MD greater than or equal to the one for the given sample, assuming normally distributed data. The smaller the p-value, the less trustworthy the prediction. For highly non-normal X properties (e.g., fingerprints), the MD p-value is wildly inaccurate.

## Structural Similar Compounds

| Name               | Carbenicillin                                                       | Bicalutamide                                                        | Glimepiride                                                         |
|--------------------|---------------------------------------------------------------------|---------------------------------------------------------------------|---------------------------------------------------------------------|
| Structure          |                                                                     |                                                                     |                                                                     |
| Actual Endpoint    | Non-Carcinogen                                                      | Carcinogen                                                          | Non-Carcinogen                                                      |
| Predicted Endpoint | Non-Carcinogen                                                      | Carcinogen                                                          | Non-Carcinogen                                                      |
| Distance           | 0.620                                                               | 0.651                                                               | 0.687                                                               |
| Reference          | US FDA (Centre for Drug Eval.& Res./Off. Testing & Res.) Sept. 1997 | US FDA (Centre for Drug Eval.& Res./Off. Testing & Res.) Sept. 1997 | US FDA (Centre for Drug Eval.& Res./Off. Testing & Res.) Sept. 1997 |

## Model Applicability

Unknown features are fingerprint features in the query molecule, but not found or appearing too infrequently in the training set.

1. All properties and OPS components are within expected ranges.
2. Unknown ECFP\_2 feature: 2131425032: [\*]\C=C(\C=[\*])/C(=[\*])[\*]
3. Unknown ECFP\_2 feature: 1182722866: [\*]C(=CC(=[\*])[\*])[\*]
4. Unknown ECFP\_2 feature: 1000552169: [\*]\C=C\1/S[\*][\*]C1=[\*]
5. Unknown ECFP\_2 feature: 190445529: [\*]N1[\*][\*]SC1=O

## Feature Contribution

### Top features for positive contribution

| Fingerprint | Bit/Smiles | Feature Structure                | Score | Carcinogen in training set |
|-------------|------------|----------------------------------|-------|----------------------------|
| ECFP_12     | 1236483485 | <br>[*]C(=[*])N(c(.[*])):<br>[*] | 0.46  | 9 out of 17                |



|                                               |                   |                                                                                                                             |              |                                   |
|-----------------------------------------------|-------------------|-----------------------------------------------------------------------------------------------------------------------------|--------------|-----------------------------------|
| ECFP_12                                       | -1925046727       | 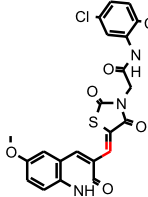<br>[*]C=[*]                             | 0.407        | 16 out of 33                      |
| ECFP_12                                       | 1336666212        | <br>[*][c](:[*]):[c](C=[*]<br>):[cH]:[*] | 0.288        | 2 out of 4                        |
| <b>Top Features for negative contribution</b> |                   |                                                                                                                             |              |                                   |
| <b>Fingerprint</b>                            | <b>Bit/Smiles</b> | <b>Feature Structure</b>                                                                                                    | <b>Score</b> | <b>Carcinogen in training set</b> |
| ECFP_12                                       | 1335833675        | <br>[*]N[c](:[cH]:[*]):[c]<br>K([*]):[*] | -1.25        | 0 out of 8                        |
| ECFP_12                                       | 1335691903        | <br>[*][c](:[*]):[c](Cl):<br>[cH]:[*]   | -1.11        | 2 out of 26                       |
| ECFP_12                                       | 99947387          | <br>[*]:[c](:[*])Cl                    | -0.817       | 8 out of 62                       |

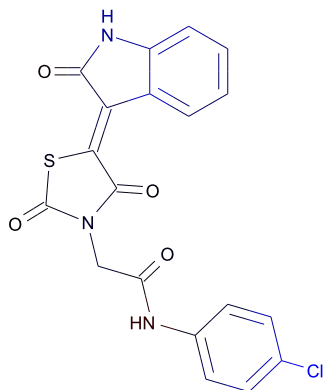

$C_{19}H_{12}ClN_3O_4S$

Molecular Weight: 413.83428

ALogP: 2.363

Rotatable Bonds: 3

Acceptors: 5

Donors: 2

## Model Prediction

Prediction: Non-Carcinogen

Probability: 0.187

Enrichment: 0.581

Bayesian Score: -9.02

Mahalanobis Distance: 8.83

Mahalanobis Distance p-value: 0.872

Prediction: Positive if the Bayesian score is above the estimated best cutoff value from minimizing the false positive and false negative rate.

Probability: The estimated probability that the sample is in the positive category. This assumes that the Bayesian score follows a normal distribution and is different from the prediction using a cutoff.

Enrichment: An estimate of enrichment, that is, the increased likelihood (versus random) of this sample being in the category.

Bayesian Score: The standard Laplacian-modified Bayesian score.

Mahalanobis Distance: The Mahalanobis distance (MD) is the distance to the center of the training data. The larger the MD, the less trustworthy the prediction.

Mahalanobis Distance p-value: The p-value gives the fraction of training data with an MD greater than or equal to the one for the given sample, assuming normally distributed data. The smaller the p-value, the less trustworthy the prediction. For highly non-normal X properties (e.g., fingerprints), the MD p-value is wildly inaccurate.

## Structural Similar Compounds

| Name               | Indapamide                                                          | Metolazone                                                          | Doxefazepam                                                         |
|--------------------|---------------------------------------------------------------------|---------------------------------------------------------------------|---------------------------------------------------------------------|
| Structure          |                                                                     |                                                                     |                                                                     |
| Actual Endpoint    | Non-Carcinogen                                                      | Non-Carcinogen                                                      | Carcinogen                                                          |
| Predicted Endpoint | Non-Carcinogen                                                      | Non-Carcinogen                                                      | Carcinogen                                                          |
| Distance           | 0.594                                                               | 0.601                                                               | 0.651                                                               |
| Reference          | US FDA (Centre for Drug Eval.& Res./Off. Testing & Res.) Sept. 1997 | US FDA (Centre for Drug Eval.& Res./Off. Testing & Res.) Sept. 1997 | US FDA (Centre for Drug Eval.& Res./Off. Testing & Res.) Sept. 1997 |

## Model Applicability

Unknown features are fingerprint features in the query molecule, but not found or appearing too infrequently in the training set.

1. All properties and OPS components are within expected ranges.
2. Unknown ECFP\_2 feature: -631778390: [\*]C(=C1S[\*][\*]C1=[\*])[\*]
3. Unknown ECFP\_2 feature: 190445529: [\*]N1[\*][\*]SC1=O

## Feature Contribution

### Top features for positive contribution

| Fingerprint | Bit/Smiles | Feature Structure               | Score | Carcinogen in training set |
|-------------|------------|---------------------------------|-------|----------------------------|
| ECFP_12     | -177077903 | <br>[*]N[c](:[cH]:[*]):[cH]:[*] | 0.529 | 6 out of 10                |

|                                               |                   |                                                                                                                                                |              |                                   |
|-----------------------------------------------|-------------------|------------------------------------------------------------------------------------------------------------------------------------------------|--------------|-----------------------------------|
| ECFP_12                                       | -1236483485       | 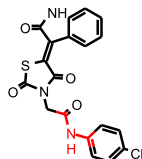<br><chem>[*]C(=[*])N(c(:[*]):[*])</chem>                   | 0.46         | 9 out of 17                       |
| ECFP_12                                       | 888054369         | <br><chem>[*]N(c1:[cH]:[*]:[c]([*]):[cH]:[cH]:1</chem>      | 0.454        | 5 out of 9                        |
| <b>Top Features for negative contribution</b> |                   |                                                                                                                                                |              |                                   |
| <b>Fingerprint</b>                            | <b>Bit/Smiles</b> | <b>Feature Structure</b>                                                                                                                       | <b>Score</b> | <b>Carcinogen in training set</b> |
| ECFP_12                                       | 1335833675        | <br><chem>[*]N(c(:[cH]:[*]:[c]([*]):[*])</chem>             | -1.25        | 0 out of 8                        |
| ECFP_12                                       | 99947387          | <br><chem>[*]:[c](:[*])Cl</chem>                           | -0.817       | 8 out of 62                       |
| ECFP_12                                       | 1854732111        | <br><chem>[*][c]1:[*]:[cH]:[c]([*])Cl):[cH]:[cH]:1</chem> | -0.816       | 4 out of 33                       |

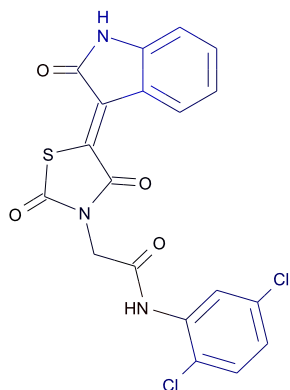

$C_{19}H_{11}Cl_2N_3O_4S$

Molecular Weight: 448.27933

ALogP: 3.028

Rotatable Bonds: 3

Acceptors: 5

Donors: 2

## Model Prediction

Prediction: Non-Carcinogen

Probability: 0.183

Enrichment: 0.568

Bayesian Score: -9.76

Mahalanobis Distance: 8.95

Mahalanobis Distance p-value: 0.836

Prediction: Positive if the Bayesian score is above the estimated best cutoff value from minimizing the false positive and false negative rate.

Probability: The estimated probability that the sample is in the positive category. This assumes that the Bayesian score follows a normal distribution and is different from the prediction using a cutoff.

Enrichment: An estimate of enrichment, that is, the increased likelihood (versus random) of this sample being in the category.

Bayesian Score: The standard Laplacian-modified Bayesian score.

Mahalanobis Distance: The Mahalanobis distance (MD) is the distance to the center of the training data. The larger the MD, the less trustworthy the prediction.

Mahalanobis Distance p-value: The p-value gives the fraction of training data with an MD greater than or equal to the one for the given sample, assuming normally distributed data. The smaller the p-value, the less trustworthy the prediction. For highly non-normal X properties (e.g., fingerprints), the MD p-value is wildly inaccurate.

## Structural Similar Compounds

| Name               | Indapamide                                                          | Metolazone                                                          | Bicalutamide                                                        |
|--------------------|---------------------------------------------------------------------|---------------------------------------------------------------------|---------------------------------------------------------------------|
| Structure          |                                                                     |                                                                     |                                                                     |
| Actual Endpoint    | Non-Carcinogen                                                      | Non-Carcinogen                                                      | Carcinogen                                                          |
| Predicted Endpoint | Non-Carcinogen                                                      | Non-Carcinogen                                                      | Carcinogen                                                          |
| Distance           | 0.629                                                               | 0.641                                                               | 0.662                                                               |
| Reference          | US FDA (Centre for Drug Eval.& Res./Off. Testing & Res.) Sept. 1997 | US FDA (Centre for Drug Eval.& Res./Off. Testing & Res.) Sept. 1997 | US FDA (Centre for Drug Eval.& Res./Off. Testing & Res.) Sept. 1997 |

## Model Applicability

Unknown features are fingerprint features in the query molecule, but not found or appearing too infrequently in the training set.

1. All properties and OPS components are within expected ranges.
2. Unknown ECFP\_2 feature: -631778390: [\*]C(=C1S[\*][\*]C1=[\*])[\*]
3. Unknown ECFP\_2 feature: 190445529: [\*]N1[\*][\*]SC1=O

## Feature Contribution

### Top features for positive contribution

| Fingerprint | Bit/Smiles | Feature Structure | Score | Carcinogen in training set |
|-------------|------------|-------------------|-------|----------------------------|
| ECFP_12     | 1236483485 |                   | 0.46  | 9 out of 17                |

|                                               |                   |                                                                                                                                     |              |                                   |
|-----------------------------------------------|-------------------|-------------------------------------------------------------------------------------------------------------------------------------|--------------|-----------------------------------|
| ECFP_12                                       | 2106656448        | 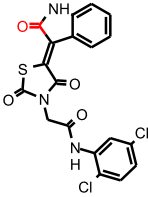<br><chem>[*]C(=O)[*]</chem>                     | 0.141        | 30 out of 83                      |
| ECFP_12                                       | 1335108269        | <br><chem>[*]N[c](:[cH]:[*]):[c]([*]):[*]</chem> | 0.119        | 4 out of 11                       |
| <b>Top Features for negative contribution</b> |                   |                                                                                                                                     |              |                                   |
| <b>Fingerprint</b>                            | <b>Bit/Smiles</b> | <b>Feature Structure</b>                                                                                                            | <b>Score</b> | <b>Carcinogen in training set</b> |
| ECFP_12                                       | 1335833675        | <br><chem>[*]N[c](:[cH]:[*]):[c]([*]):[*]</chem> | -1.25        | 0 out of 8                        |
| ECFP_12                                       | 1335691903        | <br><chem>[*][c](:[*]):[c](Cl):[cH]:[*]</chem>  | -1.11        | 2 out of 26                       |
| ECFP_12                                       | 99947387          | <br><chem>[*]:[c](:[*])Cl</chem>               | -0.817       | 8 out of 62                       |

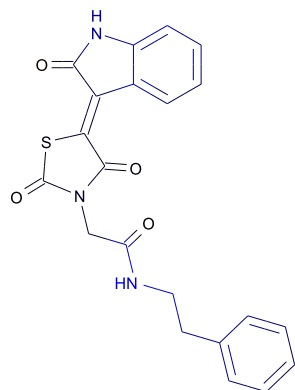

$C_{21}H_{17}N_3O_4S$

Molecular Weight: 407.44237

ALogP: 2.027

Rotatable Bonds: 5

Acceptors: 5

Donors: 2

## Model Prediction

Prediction: Non-Carcinogen

Probability: 0.177

Enrichment: 0.551

Bayesian Score: -10.9

Mahalanobis Distance: 9.75

Mahalanobis Distance p-value: 0.486

Prediction: Positive if the Bayesian score is above the estimated best cutoff value from minimizing the false positive and false negative rate.

Probability: The estimated probability that the sample is in the positive category. This assumes that the Bayesian score follows a normal distribution and is different from the prediction using a cutoff.

Enrichment: An estimate of enrichment, that is, the increased likelihood (versus random) of this sample being in the category.

Bayesian Score: The standard Laplacian-modified Bayesian score.

Mahalanobis Distance: The Mahalanobis distance (MD) is the distance to the center of the training data. The larger the MD, the less trustworthy the prediction.

Mahalanobis Distance p-value: The p-value gives the fraction of training data with an MD greater than or equal to the one for the given sample, assuming normally distributed data. The smaller the p-value, the less trustworthy the prediction. For highly non-normal X properties (e.g., fingerprints), the MD p-value is wildly inaccurate.

## Structural Similar Compounds

| Name               | Bicalutamide                                                        | Acetohexamide                                                       | Penicillin                                                          |
|--------------------|---------------------------------------------------------------------|---------------------------------------------------------------------|---------------------------------------------------------------------|
| Structure          |                                                                     |                                                                     |                                                                     |
| Actual Endpoint    | Carcinogen                                                          | Non-Carcinogen                                                      | Non-Carcinogen                                                      |
| Predicted Endpoint | Carcinogen                                                          | Non-Carcinogen                                                      | Non-Carcinogen                                                      |
| Distance           | 0.598                                                               | 0.601                                                               | 0.629                                                               |
| Reference          | US FDA (Centre for Drug Eval.& Res./Off. Testing & Res.) Sept. 1997 | US FDA (Centre for Drug Eval.& Res./Off. Testing & Res.) Sept. 1997 | US FDA (Centre for Drug Eval.& Res./Off. Testing & Res.) Sept. 1997 |

## Model Applicability

Unknown features are fingerprint features in the query molecule, but not found or appearing too infrequently in the training set.

1. All properties and OPS components are within expected ranges.
2. Unknown ECFP\_2 feature: -631778390: [\*]C(=C1S[\*][\*]C1=[\*])[\*]
3. Unknown ECFP\_2 feature: 190445529: [\*]N1[\*][\*]SC1=O

## Feature Contribution

### Top features for positive contribution

| Fingerprint | Bit/Smiles  | Feature Structure                            | Score | Carcinogen in training set |
|-------------|-------------|----------------------------------------------|-------|----------------------------|
| ECFP_12     | -1650219925 | <br>[*]C[c]1:[cH]:[cH]:[cH]:[cH]:[cH]:[cH]:1 | 0.208 | 6 out of 15                |

|                                               |                   |                                                                                                                                                   |              |                                   |
|-----------------------------------------------|-------------------|---------------------------------------------------------------------------------------------------------------------------------------------------|--------------|-----------------------------------|
| ECFP_12                                       | 1095683433        | 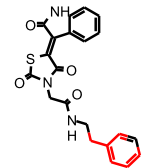<br><chem>[*]C[c]1:[cH]:[*]:[cH]:[cH]:[cH]:1</chem>            | 0.154        | 6 out of 16                       |
| ECFP_12                                       | 2106656448        | <br><chem>[*]C(=O)[*]</chem>                                   | 0.141        | 30 out of 83                      |
| <b>Top Features for negative contribution</b> |                   |                                                                                                                                                   |              |                                   |
| <b>Fingerprint</b>                            | <b>Bit/Smiles</b> | <b>Feature Structure</b>                                                                                                                          | <b>Score</b> | <b>Carcinogen in training set</b> |
| ECFP_12                                       | 1335833675        | <br><chem>[*]N[c](:[cH]:[*]):[c]([[*]):[*]</chem>              | -1.25        | 0 out of 8                        |
| ECFP_12                                       | 497523368         | <br><chem>[*]CNC(=[*])[*]</chem>                              | -0.989       | 1 out of 14                       |
| ECFP_12                                       | -104952638        | <br><chem>[*]C(=[*])NCC[c]1:[cH]:[cH]:[*]:[cH]:[cH]:1</chem> | -0.811       | 0 out of 4                        |

# Sorafenib

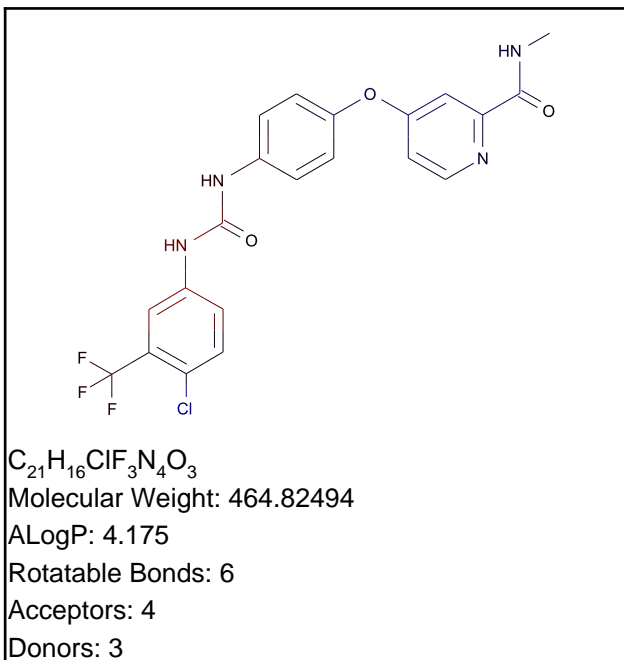

## Model Prediction

Prediction: Non-Carcinogen

Probability: 0.236

Enrichment: 0.734

Bayesian Score: -3.76

Mahalanobis Distance: 12.2

Mahalanobis Distance p-value: 0.00229

Prediction: Positive if the Bayesian score is above the estimated best cutoff value from minimizing the false positive and false negative rate.

Probability: The estimated probability that the sample is in the positive category. This assumes that the Bayesian score follows a normal distribution and is different from the prediction using a cutoff.

Enrichment: An estimate of enrichment, that is, the increased likelihood (versus random) of this sample being in the category.

Bayesian Score: The standard Laplacian-modified Bayesian score.

Mahalanobis Distance: The Mahalanobis distance (MD) is the distance to the center of the training data. The larger the MD, the less trustworthy the prediction.

Mahalanobis Distance p-value: The p-value gives the fraction of training data with an MD greater than or equal to the one for the given sample, assuming normally distributed data. The smaller the p-value, the less trustworthy the prediction. For highly non-normal X properties (e.g., fingerprints), the MD p-value is wildly inaccurate.

# TOPKAT\_Rat\_Female\_FDA\_None\_vs\_Carcinogen

## Structural Similar Compounds

| Name               | Glimepiride                                                                         | Glyburide                                                                           | Fluvastatin                                                                         |
|--------------------|-------------------------------------------------------------------------------------|-------------------------------------------------------------------------------------|-------------------------------------------------------------------------------------|
| Structure          | 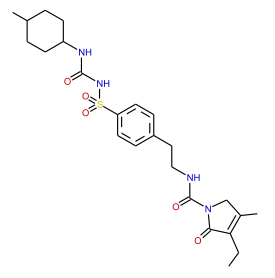 |  |  |
| Actual Endpoint    | Non-Carcinogen                                                                      | Non-Carcinogen                                                                      | Non-Carcinogen                                                                      |
| Predicted Endpoint | Non-Carcinogen                                                                      | Non-Carcinogen                                                                      | Non-Carcinogen                                                                      |
| Distance           | 0.620                                                                               | 0.635                                                                               | 0.635                                                                               |
| Reference          | US FDA (Centre for Drug Eval.& Res./Off. Testing & Res.) Sept. 1997                 | US FDA (Centre for Drug Eval.& Res./Off. Testing & Res.) Sept. 1997                 | US FDA (Centre for Drug Eval.& Res./Off. Testing & Res.) Sept. 1997                 |

## Model Applicability

Unknown features are fingerprint features in the query molecule, but not found or appearing too infrequently in the training set.

1. All properties and OPS components are within expected ranges.

## Feature Contribution

### Top features for positive contribution

| Fingerprint | Bit/Smiles | Feature Structure                                                                                                                                                  | Score | Carcinogen in training set |
|-------------|------------|--------------------------------------------------------------------------------------------------------------------------------------------------------------------|-------|----------------------------|
| ECFP_12     | -970385855 | 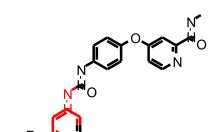<br><chem>[*]N(c1cc2cc([N+](=O)[O-])ccc2c1)c3cc4cc([N+](=O)[O-])ccc4c3</chem> | 0.613 | 2 out of 2                 |



|                                               |                   |                                                                                                                          |              |                                   |
|-----------------------------------------------|-------------------|--------------------------------------------------------------------------------------------------------------------------|--------------|-----------------------------------|
| ECFP_12                                       | -177077903        | 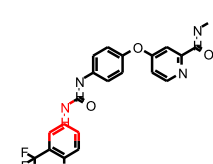<br>[*]N[c](:[cH]:[*]):[c<br>H]:[*]    | 0.529        | 6 out of 10                       |
| ECFP_12                                       | -1236483485       | <br>[*]C(=[*])N[c](:[*]):<br>[*]      | 0.46         | 9 out of 17                       |
| <b>Top Features for negative contribution</b> |                   |                                                                                                                          |              |                                   |
| <b>Fingerprint</b>                            | <b>Bit/Smiles</b> | <b>Feature Structure</b>                                                                                                 | <b>Score</b> | <b>Carcinogen in training set</b> |
| ECFP_12                                       | 1335691903        | <br>[*][c](:[*]):[c](Cl):<br>[cH]:[*] | -1.11        | 2 out of 26                       |
| ECFP_12                                       | 99947387          | <br>[*]:[c](:[*])Cl                  | -0.817       | 8 out of 62                       |
| ECFP_12                                       | 1413420509        | <br>[*]C(=[*])[c](:[cH]:[*]):n:[*]  | -0.661       | 0 out of 3                        |

# Sunitinib

# TOPKAT\_Rat\_Female\_FDA\_None\_vs\_Carcinogen

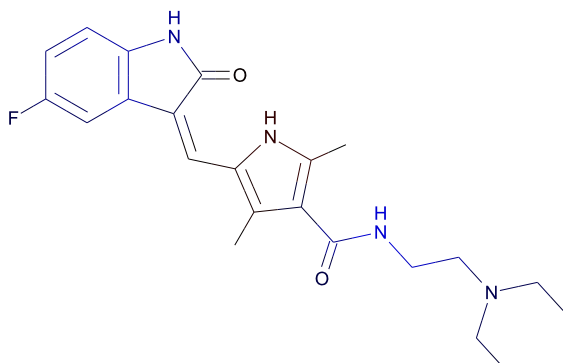

$C_{22}H_{27}FN_4O_2$

Molecular Weight: 398.47378

ALogP: 2.997

Rotatable Bonds: 7

Acceptors: 3

Donors: 3

## Model Prediction

Prediction: Non-Carcinogen

Probability: 0.188

Enrichment: 0.584

Bayesian Score: -8.84

Mahalanobis Distance: 11.3

Mahalanobis Distance p-value: 0.0371

Prediction: Positive if the Bayesian score is above the estimated best cutoff value from minimizing the false positive and false negative rate.

Probability: The estimated probability that the sample is in the positive category. This assumes that the Bayesian score follows a normal distribution and is different from the prediction using a cutoff.

Enrichment: An estimate of enrichment, that is, the increased likelihood (versus random) of this sample being in the category.

Bayesian Score: The standard Laplacian-modified Bayesian score.

Mahalanobis Distance: The Mahalanobis distance (MD) is the distance to the center of the training data. The larger the MD, the less trustworthy the prediction.

Mahalanobis Distance p-value: The p-value gives the fraction of training data with an MD greater than or equal to the one for the given sample, assuming normally distributed data. The smaller the p-value, the less trustworthy the prediction. For highly non-normal X properties (e.g., fingerprints), the MD p-value is wildly inaccurate.

## Structural Similar Compounds

| Name               | Fluvastatin                                                                         | Metoclopramide                                                                      | Torseptide                                                                          |
|--------------------|-------------------------------------------------------------------------------------|-------------------------------------------------------------------------------------|-------------------------------------------------------------------------------------|
| Structure          | 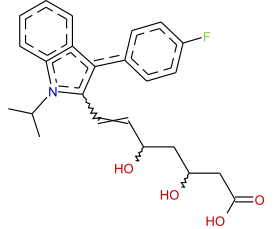 |  |  |
| Actual Endpoint    | Non-Carcinogen                                                                      | Non-Carcinogen                                                                      | Carcinogen                                                                          |
| Predicted Endpoint | Non-Carcinogen                                                                      | Non-Carcinogen                                                                      | Carcinogen                                                                          |
| Distance           | 0.629                                                                               | 0.681                                                                               | 0.684                                                                               |
| Reference          | US FDA (Centre for Drug Eval.& Res./Off. Testing & Res.) Sept. 1997                 | US FDA (Centre for Drug Eval.& Res./Off. Testing & Res.) Sept. 1997                 | US FDA (Centre for Drug Eval.& Res./Off. Testing & Res.) Sept. 1997                 |

## Model Applicability

Unknown features are fingerprint features in the query molecule, but not found or appearing too infrequently in the training set.

1. All properties and OPS components are within expected ranges.
2. Unknown ECFP\_2 feature: 980271847: [\*][c]1:[\*]:[\*]:[nH]:[c]:1C=[\*]
3. Unknown ECFP\_2 feature: 1791989338: [\*][c]1:[\*]:[\*]:[nH]:[c]:1C
4. Unknown ECFP\_2 feature: 1182722866: [\*]C(=CC(=[\*])[\*])[\*]

## Feature Contribution

### Top features for positive contribution

| Fingerprint | Bit/Smiles | Feature Structure                                                                                                        | Score | Carcinogen in training set |
|-------------|------------|--------------------------------------------------------------------------------------------------------------------------|-------|----------------------------|
| ECFP_12     | 558201926  | 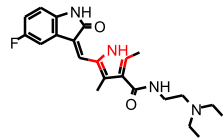<br>[*][c]1:[*]:[*]:[c]([*]):[nH]:1 | 0.539 | 5 out of 8                 |

|                                               |                   |                                                                                                                                                |              |                                   |
|-----------------------------------------------|-------------------|------------------------------------------------------------------------------------------------------------------------------------------------|--------------|-----------------------------------|
| ECFP_12                                       | -1658273810       | 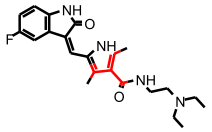<br><chem>[*]C(=[*])[c]1:[c]([*]):[*]:[c]:1[*]</chem>       | 0.421        | 1 out of 1                        |
| ECFP_12                                       | -152683720        | <br><chem>[*]:[nH]:[*]</chem>                               | 0.412        | 9 out of 18                       |
| <b>Top Features for negative contribution</b> |                   |                                                                                                                                                |              |                                   |
| <b>Fingerprint</b>                            | <b>Bit/Smiles</b> | <b>Feature Structure</b>                                                                                                                       | <b>Score</b> | <b>Carcinogen in training set</b> |
| ECFP_12                                       | 1335833675        | <br><chem>[*]N[c](:[cH]:[*]):[c]([*]):[*]</chem>            | -1.25        | 0 out of 8                        |
| ECFP_12                                       | 497523368         | <br><chem>[*]CNC(=[*])[*]</chem>                           | -0.989       | 1 out of 14                       |
| ECFP_12                                       | 2083628577        | <br><chem>[*]N[c]1:[cH]:[cH]:[c]([*]):[*]:[c]:1[*]</chem> | -0.811       | 0 out of 4                        |

10a

TOPKAT\_Rat\_Male\_FDA\_None\_vs\_Carcinogen

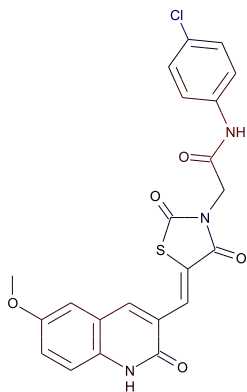C<sub>22</sub>H<sub>16</sub>ClN<sub>3</sub>O<sub>5</sub>S

Molecular Weight: 469.89753

ALogP: 2.815

Rotatable Bonds: 5

Acceptors: 6

Donors: 2

### Model Prediction

Prediction: Non-Carcinogen

Probability: 0.341

Enrichment: 1.02

Bayesian Score: -0.539

Mahalanobis Distance: 12

Mahalanobis Distance p-value: 0.0309

Prediction: Positive if the Bayesian score is above the estimated best cutoff value from minimizing the false positive and false negative rate.

Probability: The estimated probability that the sample is in the positive category. This assumes that the Bayesian score follows a normal distribution and is different from the prediction using a cutoff.

Enrichment: An estimate of enrichment, that is, the increased likelihood (versus random) of this sample being in the category.

Bayesian Score: The standard Laplacian-modified Bayesian score.

Mahalanobis Distance: The Mahalanobis distance (MD) is the distance to the center of the training data. The larger the MD, the less trustworthy the prediction.

Mahalanobis Distance p-value: The p-value gives the fraction of training data with an MD greater than or equal to the one for the given sample, assuming normally distributed data. The smaller the p-value, the less trustworthy the prediction. For highly non-normal X properties (e.g., fingerprints), the MD p-value is wildly inaccurate.

### Structural Similar Compounds

| Name               | Bicalutamide                                                        | Carbenicillin                                                       | Polythiazide                                                        |
|--------------------|---------------------------------------------------------------------|---------------------------------------------------------------------|---------------------------------------------------------------------|
| Structure          |                                                                     |                                                                     |                                                                     |
| Actual Endpoint    | Carcinogen                                                          | Non-Carcinogen                                                      | Non-Carcinogen                                                      |
| Predicted Endpoint | Carcinogen                                                          | Non-Carcinogen                                                      | Non-Carcinogen                                                      |
| Distance           | 0.572                                                               | 0.627                                                               | 0.632                                                               |
| Reference          | US FDA (Centre for Drug Eval.& Res./Off. Testing & Res.) Sept. 1997 | US FDA (Centre for Drug Eval.& Res./Off. Testing & Res.) Sept. 1997 | US FDA (Centre for Drug Eval.& Res./Off. Testing & Res.) Sept. 1997 |

### Model Applicability

Unknown features are fingerprint features in the query molecule, but not found or appearing too infrequently in the training set.

1. OPS PC7 out of range. Value: 5.8284. Training min, max, SD, explained variance: -5.7463, 5.4773, 2.041, 0.0388.

### Feature Contribution

#### Top features for positive contribution

| Fingerprint | Bit/Smiles | Feature Structure                                 | Score | Carcinogen in training set |
|-------------|------------|---------------------------------------------------|-------|----------------------------|
| SCFP_6      | -347048986 | <br>[*]C(=[*])N[c]1:[cH]:<br>[cH]:[*]:[cH]:[cH]:1 | 0.615 | 5 out of 7                 |

|                                               |                   |                                                                                                                                                   |              |                                   |
|-----------------------------------------------|-------------------|---------------------------------------------------------------------------------------------------------------------------------------------------|--------------|-----------------------------------|
| SCFP_6                                        | 814408713         | 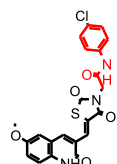<br><chem>[*]CC(=O)N(c1:[cH]:[cH]:[c]([*]):[cH]:[cH]):1</chem> | 0.603        | 2 out of 2                        |
| SCFP_6                                        | 2097618059        | <br><chem>[*]CC(=O)N(c1:[cH]:[*]):1</chem>                     | 0.437        | 7 out of 13                       |
| <b>Top Features for negative contribution</b> |                   |                                                                                                                                                   |              |                                   |
| <b>Fingerprint</b>                            | <b>Bit/Smiles</b> | <b>Feature Structure</b>                                                                                                                          | <b>Score</b> | <b>Carcinogen in training set</b> |
| SCFP_6                                        | 399659969         | <br><chem>[*]CN1C(=[*])[*]C1=O</chem>                          | -0.578       | 1 out of 8                        |
| SCFP_6                                        | 2102703671        | <br><chem>[*]C1=[*][c]([*]):[c](NC1=O):[cH]:[*]</chem>        | -0.496       | 0 out of 2                        |
| SCFP_6                                        | 1905487031        | <br><chem>[*][c]1:[cH]:[cH]:[c](Cl):[cH]:1</chem>            | -0.48        | 2 out of 12                       |

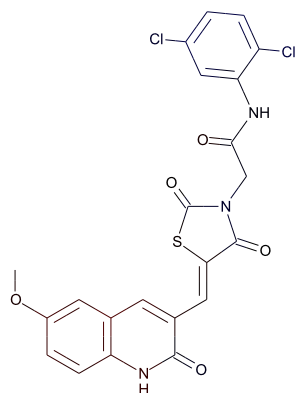

$C_{22}H_{15}Cl_2N_3O_5S$

Molecular Weight: 504.3426

ALogP: 3.479

Rotatable Bonds: 5

Acceptors: 6

Donors: 2

## Model Prediction

Prediction: Non-Carcinogen

Probability: 0.297

Enrichment: 0.89

Bayesian Score: -2.23

Mahalanobis Distance: 12.1

Mahalanobis Distance p-value: 0.0246

Prediction: Positive if the Bayesian score is above the estimated best cutoff value from minimizing the false positive and false negative rate.

Probability: The estimated probability that the sample is in the positive category. This assumes that the Bayesian score follows a normal distribution and is different from the prediction using a cutoff.

Enrichment: An estimate of enrichment, that is, the increased likelihood (versus random) of this sample being in the category.

Bayesian Score: The standard Laplacian-modified Bayesian score.

Mahalanobis Distance: The Mahalanobis distance (MD) is the distance to the center of the training data. The larger the MD, the less trustworthy the prediction.

Mahalanobis Distance p-value: The p-value gives the fraction of training data with an MD greater than or equal to the one for the given sample, assuming normally distributed data. The smaller the p-value, the less trustworthy the prediction. For highly non-normal X properties (e.g., fingerprints), the MD p-value is wildly inaccurate.

## Structural Similar Compounds

| Name               | Carbenicillin                                                       | Bicalutamide                                                        | Moricizine                                                          |
|--------------------|---------------------------------------------------------------------|---------------------------------------------------------------------|---------------------------------------------------------------------|
| Structure          |                                                                     |                                                                     |                                                                     |
| Actual Endpoint    | Non-Carcinogen                                                      | Carcinogen                                                          | Carcinogen                                                          |
| Predicted Endpoint | Non-Carcinogen                                                      | Carcinogen                                                          | Carcinogen                                                          |
| Distance           | 0.607                                                               | 0.625                                                               | 0.672                                                               |
| Reference          | US FDA (Centre for Drug Eval.& Res./Off. Testing & Res.) Sept. 1997 | US FDA (Centre for Drug Eval.& Res./Off. Testing & Res.) Sept. 1997 | US FDA (Centre for Drug Eval.& Res./Off. Testing & Res.) Sept. 1997 |

## Model Applicability

Unknown features are fingerprint features in the query molecule, but not found or appearing too infrequently in the training set.

1. OPS PC7 out of range. Value: 5.8042. Training min, max, SD, explained variance: -5.7463, 5.4773, 2.041, 0.0388.

## Feature Contribution

### Top features for positive contribution

| Fingerprint | Bit/Smiles | Feature Structure                                                | Score | Carcinogen in training set |
|-------------|------------|------------------------------------------------------------------|-------|----------------------------|
| SCFP_6      | 2097618059 | <br><chem>[*]CC(=O)N(c1c([cH]:[*])c([cH]:[*])cc1Cl)C(=O)N</chem> | 0.437 | 7 out of 13                |

|                                               |                   |                                                                                                                                                                                          |              |                                   |
|-----------------------------------------------|-------------------|------------------------------------------------------------------------------------------------------------------------------------------------------------------------------------------|--------------|-----------------------------------|
| SCFP_6                                        | -1971137145       | 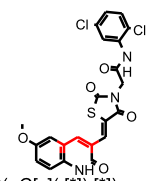<br><chem>[*]C(=C[c](:[*]):[*])</chem><br><chem>[*]</chem>                                            | 0.434        | 5 out of 9                        |
| SCFP_6                                        | 392579710         | <br><chem>[*]O[c]1:[c]1:[*]:[c]</chem><br><chem>([*]):[c](C=[*]):[cH]</chem><br><chem>:1</chem>       | 0.425        | 2 out of 3                        |
| <b>Top Features for negative contribution</b> |                   |                                                                                                                                                                                          |              |                                   |
| <b>Fingerprint</b>                            | <b>Bit/Smiles</b> | <b>Feature Structure</b>                                                                                                                                                                 | <b>Score</b> | <b>Carcinogen in training set</b> |
| SCFP_6                                        | 399659969         | <br><chem>[*]CN1C(=[*])[*]C1</chem><br><chem>=[*]</chem>                                              | -0.578       | 1 out of 8                        |
| SCFP_6                                        | 2102703671        | <br><chem>[*]C1=[*][c](:[*]):[c]</chem><br><chem>](NC1=O):[cH]:[*]</chem>                            | -0.496       | 0 out of 2                        |
| SCFP_6                                        | -345817764        | <br><chem>[*]C(=[*])N(c)[*]:[cH]:</chem><br><chem>[c]([*]):[*]:[cH]:[c]</chem><br><chem>:1Cl</chem> | -0.496       | 0 out of 2                        |

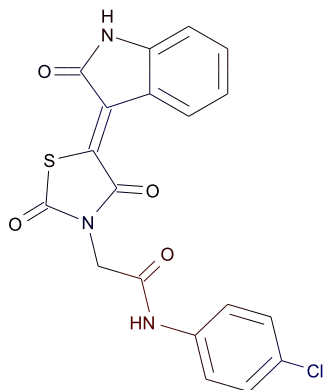

$C_{19}H_{12}ClN_3O_4S$

Molecular Weight: 413.83428

ALogP: 2.363

Rotatable Bonds: 3

Acceptors: 5

Donors: 2

## Model Prediction

Prediction: Non-Carcinogen

Probability: 0.312

Enrichment: 0.935

Bayesian Score: -1.62

Mahalanobis Distance: 9.5

Mahalanobis Distance p-value: 0.845

Prediction: Positive if the Bayesian score is above the estimated best cutoff value from minimizing the false positive and false negative rate.

Probability: The estimated probability that the sample is in the positive category. This assumes that the Bayesian score follows a normal distribution and is different from the prediction using a cutoff.

Enrichment: An estimate of enrichment, that is, the increased likelihood (versus random) of this sample being in the category.

Bayesian Score: The standard Laplacian-modified Bayesian score.

Mahalanobis Distance: The Mahalanobis distance (MD) is the distance to the center of the training data. The larger the MD, the less trustworthy the prediction.

Mahalanobis Distance p-value: The p-value gives the fraction of training data with an MD greater than or equal to the one for the given sample, assuming normally distributed data. The smaller the p-value, the less trustworthy the prediction. For highly non-normal X properties (e.g., fingerprints), the MD p-value is wildly inaccurate.

## Structural Similar Compounds

| Name               | Indapamide                                                          | Metolazone                                                          | Doxefazepam                                                         |
|--------------------|---------------------------------------------------------------------|---------------------------------------------------------------------|---------------------------------------------------------------------|
| Structure          |                                                                     |                                                                     |                                                                     |
| Actual Endpoint    | Non-Carcinogen                                                      | Non-Carcinogen                                                      | Carcinogen                                                          |
| Predicted Endpoint | Non-Carcinogen                                                      | Non-Carcinogen                                                      | Carcinogen                                                          |
| Distance           | 0.564                                                               | 0.571                                                               | 0.605                                                               |
| Reference          | US FDA (Centre for Drug Eval.& Res./Off. Testing & Res.) Sept. 1997 | US FDA (Centre for Drug Eval.& Res./Off. Testing & Res.) Sept. 1997 | US FDA (Centre for Drug Eval.& Res./Off. Testing & Res.) Sept. 1997 |

## Model Applicability

Unknown features are fingerprint features in the query molecule, but not found or appearing too infrequently in the training set.

1. All properties and OPS components are within expected ranges.

## Feature Contribution

### Top features for positive contribution

| Fingerprint | Bit/Smiles | Feature Structure                                 | Score | Carcinogen in training set |
|-------------|------------|---------------------------------------------------|-------|----------------------------|
| SCFP_6      | -347048986 | <br>[*]C(=[*])N[c]1:[cH]:<br>[cH]:[*]:[cH]:[cH]:1 | 0.615 | 5 out of 7                 |



|                                               |                   |                                                                                                                                                 |              |                                   |
|-----------------------------------------------|-------------------|-------------------------------------------------------------------------------------------------------------------------------------------------|--------------|-----------------------------------|
| SCFP_6                                        | 814408713         | 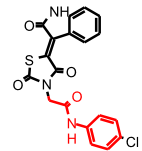<br><chem>[*]CC(=O)N(c1:[cH]:[cH]:[c]([*])[cH]:[cH]:1</chem> | 0.603        | 2 out of 2                        |
| SCFP_6                                        | 2097618059        | <br><chem>[*]CC(=O)N(c1:[cH]:[*])[cH]:[*]</chem>             | 0.437        | 7 out of 13                       |
| <b>Top Features for negative contribution</b> |                   |                                                                                                                                                 |              |                                   |
| <b>Fingerprint</b>                            | <b>Bit/Smiles</b> | <b>Feature Structure</b>                                                                                                                        | <b>Score</b> | <b>Carcinogen in training set</b> |
| SCFP_6                                        | 1798334293        | <br><chem>[*]C(=C1C(=[*])[*])[*]:[e]1:[*])[*]</chem>         | -0.674       | 0 out of 3                        |
| SCFP_6                                        | 399659969         | <br><chem>[*]CN1C(=[*])[*][*]C1=[*]</chem>                 | -0.578       | 1 out of 8                        |
| SCFP_6                                        | 2102703671        | <br><chem>[*]C1=[*][c](:[*]):[c](NC1=O):[cH]:[*]</chem>    | -0.496       | 0 out of 2                        |

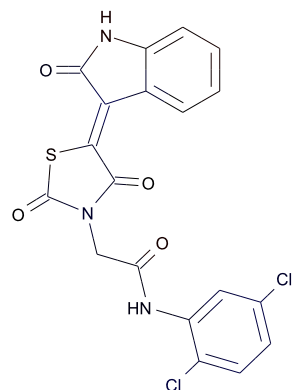

$C_{19}H_{11}Cl_2N_3O_4S$

Molecular Weight: 448.27933

ALogP: 3.028

Rotatable Bonds: 3

Acceptors: 5

Donors: 2

## Model Prediction

Prediction: Non-Carcinogen

Probability: 0.28

Enrichment: 0.838

Bayesian Score: -2.98

Mahalanobis Distance: 9.53

Mahalanobis Distance p-value: 0.835

Prediction: Positive if the Bayesian score is above the estimated best cutoff value from minimizing the false positive and false negative rate.

Probability: The estimated probability that the sample is in the positive category. This assumes that the Bayesian score follows a normal distribution and is different from the prediction using a cutoff.

Enrichment: An estimate of enrichment, that is, the increased likelihood (versus random) of this sample being in the category.

Bayesian Score: The standard Laplacian-modified Bayesian score.

Mahalanobis Distance: The Mahalanobis distance (MD) is the distance to the center of the training data. The larger the MD, the less trustworthy the prediction.

Mahalanobis Distance p-value: The p-value gives the fraction of training data with an MD greater than or equal to the one for the given sample, assuming normally distributed data. The smaller the p-value, the less trustworthy the prediction. For highly non-normal X properties (e.g., fingerprints), the MD p-value is wildly inaccurate.

## Structural Similar Compounds

| Name               | Indapamide                                                          | Metolazone                                                          | Bicalutamide                                                        |
|--------------------|---------------------------------------------------------------------|---------------------------------------------------------------------|---------------------------------------------------------------------|
| Structure          |                                                                     |                                                                     |                                                                     |
| Actual Endpoint    | Non-Carcinogen                                                      | Non-Carcinogen                                                      | Carcinogen                                                          |
| Predicted Endpoint | Non-Carcinogen                                                      | Non-Carcinogen                                                      | Carcinogen                                                          |
| Distance           | 0.611                                                               | 0.620                                                               | 0.637                                                               |
| Reference          | US FDA (Centre for Drug Eval.& Res./Off. Testing & Res.) Sept. 1997 | US FDA (Centre for Drug Eval.& Res./Off. Testing & Res.) Sept. 1997 | US FDA (Centre for Drug Eval.& Res./Off. Testing & Res.) Sept. 1997 |

## Model Applicability

Unknown features are fingerprint features in the query molecule, but not found or appearing too infrequently in the training set.

1. All properties and OPS components are within expected ranges.

## Feature Contribution

### Top features for positive contribution

| Fingerprint | Bit/Smiles | Feature Structure                        | Score | Carcinogen in training set |
|-------------|------------|------------------------------------------|-------|----------------------------|
| SCFP_6      | 2097618059 | <br>[*]CC(=O)N(c)[:-[cH]:[*]):-[cH]:[*]] | 0.437 | 7 out of 13                |

|                                               |                   |                                                                                                                                      |              |                                   |
|-----------------------------------------------|-------------------|--------------------------------------------------------------------------------------------------------------------------------------|--------------|-----------------------------------|
| SCFP_6                                        | 1655488245        | 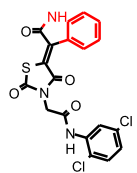<br>[*]1[*][c]2:[cH]:[cH]<br>:[cH]:[cH]:[c]:2N1   | 0.252        | 4 out of 9                        |
| SCFP_6                                        | -1375926917       | <br>[*]N[c]1:[cH]:[*]:[c]<br>([*]):[cH]:[cH]:1    | 0.251        | 11 out of 26                      |
| <b>Top Features for negative contribution</b> |                   |                                                                                                                                      |              |                                   |
| <b>Fingerprint</b>                            | <b>Bit/Smiles</b> | <b>Feature Structure</b>                                                                                                             | <b>Score</b> | <b>Carcinogen in training set</b> |
| SCFP_6                                        | 1798334293        | <br>[*]C(=C1C(=[*])[*])[*]<br>:[c]1:[*])[*]       | -0.674       | 0 out of 3                        |
| SCFP_6                                        | 399659969         | <br>[*]CN1C(=[*])[*][*]C1<br>=[*]                | -0.578       | 1 out of 8                        |
| SCFP_6                                        | 2102703671        | <br>[*]C1=[*][c](:[*]):[c]<br>](NC1=O):[cH]:[*] | -0.496       | 0 out of 2                        |

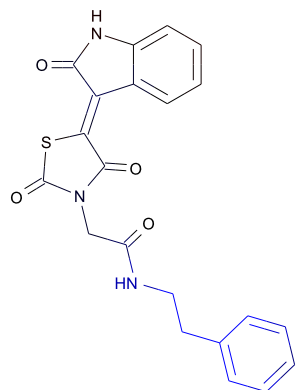

$C_{21}H_{17}N_3O_4S$

Molecular Weight: 407.44237

ALogP: 2.027

Rotatable Bonds: 5

Acceptors: 5

Donors: 2

## Model Prediction

Prediction: Non-Carcinogen

Probability: 0.186

Enrichment: 0.556

Bayesian Score: -8.37

Mahalanobis Distance: 13.3

Mahalanobis Distance p-value: 0.000591

Prediction: Positive if the Bayesian score is above the estimated best cutoff value from minimizing the false positive and false negative rate.

Probability: The estimated probability that the sample is in the positive category. This assumes that the Bayesian score follows a normal distribution and is different from the prediction using a cutoff.

Enrichment: An estimate of enrichment, that is, the increased likelihood (versus random) of this sample being in the category.

Bayesian Score: The standard Laplacian-modified Bayesian score.

Mahalanobis Distance: The Mahalanobis distance (MD) is the distance to the center of the training data. The larger the MD, the less trustworthy the prediction.

Mahalanobis Distance p-value: The p-value gives the fraction of training data with an MD greater than or equal to the one for the given sample, assuming normally distributed data. The smaller the p-value, the less trustworthy the prediction. For highly non-normal X properties (e.g., fingerprints), the MD p-value is wildly inaccurate.

## Structural Similar Compounds

| Name               | Bicalutamide                                                        | Acetohexamide                                                       | Indapamide                                                          |
|--------------------|---------------------------------------------------------------------|---------------------------------------------------------------------|---------------------------------------------------------------------|
| Structure          |                                                                     |                                                                     |                                                                     |
| Actual Endpoint    | Carcinogen                                                          | Non-Carcinogen                                                      | Non-Carcinogen                                                      |
| Predicted Endpoint | Carcinogen                                                          | Non-Carcinogen                                                      | Non-Carcinogen                                                      |
| Distance           | 0.567                                                               | 0.574                                                               | 0.615                                                               |
| Reference          | US FDA (Centre for Drug Eval.& Res./Off. Testing & Res.) Sept. 1997 | US FDA (Centre for Drug Eval.& Res./Off. Testing & Res.) Sept. 1997 | US FDA (Centre for Drug Eval.& Res./Off. Testing & Res.) Sept. 1997 |

## Model Applicability

Unknown features are fingerprint features in the query molecule, but not found or appearing too infrequently in the training set.

- OPS PC29 out of range. Value: -3.5892. Training min, max, SD, explained variance: -3.1746, 3.7825, 1.007, 0.0095.

## Feature Contribution

### Top features for positive contribution

| Fingerprint | Bit/Smiles | Feature Structure                               | Score | Carcinogen in training set |
|-------------|------------|-------------------------------------------------|-------|----------------------------|
| SCFP_6      | 1655488245 | <br>[*]1[*][c]2:[cH]:[cH]<br>:[cH]:[cH]:[c]:2N1 | 0.252 | 4 out of 9                 |

|                                               |                   |                                                                                                                               |              |                                   |
|-----------------------------------------------|-------------------|-------------------------------------------------------------------------------------------------------------------------------|--------------|-----------------------------------|
| SCFP_6                                        | -1375926917       | 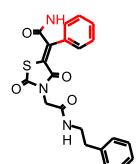<br>[*]N[c]1:[cH]:[*]:[c]([*]):[cH]:[cH]:1 | 0.251        | 11 out of 26                      |
| SCFP_6                                        | 1631845520        | <br>[*]C(=[*])N[c](:[*]):[*]               | 0.216        | 9 out of 22                       |
| <b>Top Features for negative contribution</b> |                   |                                                                                                                               |              |                                   |
| <b>Fingerprint</b>                            | <b>Bit/Smiles</b> | <b>Feature Structure</b>                                                                                                      | <b>Score</b> | <b>Carcinogen in training set</b> |
| SCFP_6                                        | -1211866396       | <br>[*]CC[c]1:[cH]:[cH]:[*]:[cH]:[cH]:1    | -1.1         | 2 out of 25                       |
| SCFP_6                                        | -1849236245       | <br>[*]NCC[c](:[cH]:[*]):[cH]:[*]         | -0.825       | 0 out of 4                        |
| SCFP_6                                        | -1640858361       | <br>[*]CC[c]1:[cH]:[cH]:[cH]:[cH]:[cH]:1 | -0.817       | 1 out of 11                       |

# Sorafenib

# TOPKAT\_Rat\_Male\_FDA\_None\_vs\_Carcinogen

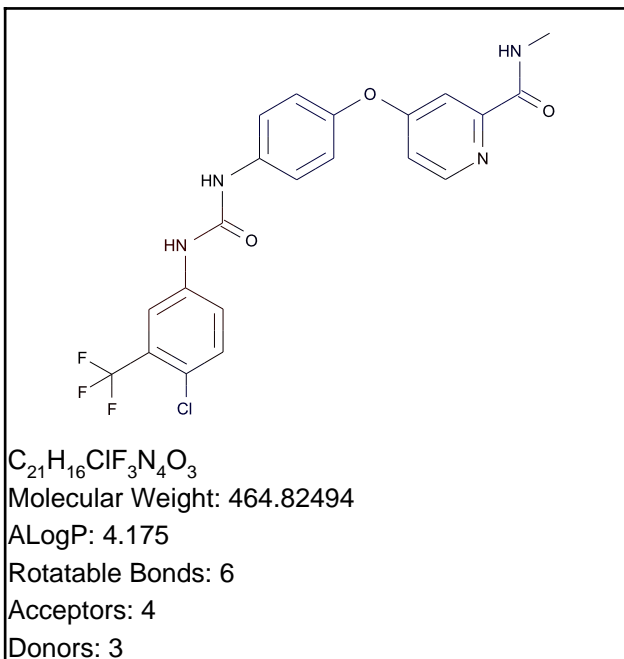

## Model Prediction

Prediction: Non-Carcinogen

Probability: 0.293

Enrichment: 0.878

Bayesian Score: -2.4

Mahalanobis Distance: 17.6

Mahalanobis Distance p-value: 1.1e-012

Prediction: Positive if the Bayesian score is above the estimated best cutoff value from minimizing the false positive and false negative rate.

Probability: The estimated probability that the sample is in the positive category. This assumes that the Bayesian score follows a normal distribution and is different from the prediction using a cutoff.

Enrichment: An estimate of enrichment, that is, the increased likelihood (versus random) of this sample being in the category.

Bayesian Score: The standard Laplacian-modified Bayesian score.

Mahalanobis Distance: The Mahalanobis distance (MD) is the distance to the center of the training data. The larger the MD, the less trustworthy the prediction.

Mahalanobis Distance p-value: The p-value gives the fraction of training data with an MD greater than or equal to the one for the given sample, assuming normally distributed data. The smaller the p-value, the less trustworthy the prediction. For highly non-normal X properties (e.g., fingerprints), the MD p-value is wildly inaccurate.

## Structural Similar Compounds

| Name               | Glyburide                                                                           | Glimepiride                                                                         | Fluvastatin                                                                         |
|--------------------|-------------------------------------------------------------------------------------|-------------------------------------------------------------------------------------|-------------------------------------------------------------------------------------|
| Structure          | 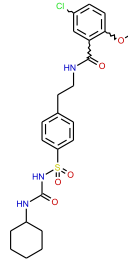 |  |  |
| Actual Endpoint    | Non-Carcinogen                                                                      | Non-Carcinogen                                                                      | Carcinogen                                                                          |
| Predicted Endpoint | Non-Carcinogen                                                                      | Non-Carcinogen                                                                      | Carcinogen                                                                          |
| Distance           | 0.593                                                                               | 0.600                                                                               | 0.615                                                                               |
| Reference          | US FDA (Centre for Drug Eval.& Res./Off. Testing & Res.) Sept. 1997                 | US FDA (Centre for Drug Eval.& Res./Off. Testing & Res.) Sept. 1997                 | US FDA (Centre for Drug Eval.& Res./Off. Testing & Res.) Sept. 1997                 |

## Model Applicability

Unknown features are fingerprint features in the query molecule, but not found or appearing too infrequently in the training set.

1. All properties and OPS components are within expected ranges.

## Feature Contribution

### Top features for positive contribution

| Fingerprint | Bit/Smiles | Feature Structure                                                                                                                               | Score | Carcinogen in training set |
|-------------|------------|-------------------------------------------------------------------------------------------------------------------------------------------------|-------|----------------------------|
| SCFP_6      | 347048986  | 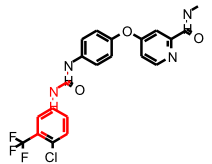<br><chem>[*]C(=[*])N[c]1:[cH]:[cH]:[*]:[cH]:[cH]:1</chem> | 0.615 | 5 out of 7                 |

|                                               |                   |                                                                                                                                                     |              |                                   |
|-----------------------------------------------|-------------------|-----------------------------------------------------------------------------------------------------------------------------------------------------|--------------|-----------------------------------|
| SCFP_6                                        | -754059116        | 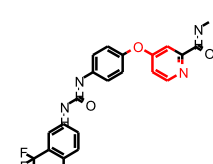<br>[*]O[c]1:[cH]:[*]:n:[cH]:[cH]:1                               | 0.415        | 1 out of 1                        |
| SCFP_6                                        | -531283893        | <br>[*]O[c]1:[cH]:[cH]:[c](NC(=[*])[*]):[cH]:[cH]:1              | 0.273        | 2 out of 4                        |
| <b>Top Features for negative contribution</b> |                   |                                                                                                                                                     |              |                                   |
| <b>Fingerprint</b>                            | <b>Bit/Smiles</b> | <b>Feature Structure</b>                                                                                                                            | <b>Score</b> | <b>Carcinogen in training set</b> |
| SCFP_6                                        | -827073191        | <br>[*]C(=[*])[c]1:[cH]:[*]:[cH]:[cH]:n:1                        | -0.674       | 0 out of 3                        |
| SCFP_6                                        | -975241316        | <br>[*][c]1:[cH]:[cH]:[c](O[c](:[cH]:[*]):[cH]:[*]):[cH]:[cH]:1 | -0.496       | 0 out of 2                        |
| SCFP_6                                        | -488587948        | <br>[*]:[e]([*])O[c]1:[cH]:[cH]:[*]:[cH]:[cH]:1                | -0.496       | 0 out of 2                        |

# Sunitinib

# TOPKAT\_Rat\_Male\_FDA\_None\_vs\_Carcinogen

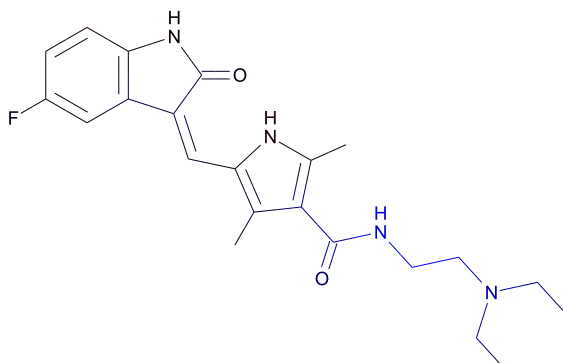

$C_{22}H_{27}FN_4O_2$

Molecular Weight: 398.47378

ALogP: 2.997

Rotatable Bonds: 7

Acceptors: 3

Donors: 3

## Model Prediction

Prediction: Non-Carcinogen

Probability: 0.217

Enrichment: 0.648

Bayesian Score: -6.26

Mahalanobis Distance: 15.7

Mahalanobis Distance p-value: 2.18e-008

Prediction: Positive if the Bayesian score is above the estimated best cutoff value from minimizing the false positive and false negative rate.

Probability: The estimated probability that the sample is in the positive category. This assumes that the Bayesian score follows a normal distribution and is different from the prediction using a cutoff.

Enrichment: An estimate of enrichment, that is, the increased likelihood (versus random) of this sample being in the category.

Bayesian Score: The standard Laplacian-modified Bayesian score.

Mahalanobis Distance: The Mahalanobis distance (MD) is the distance to the center of the training data. The larger the MD, the less trustworthy the prediction.

Mahalanobis Distance p-value: The p-value gives the fraction of training data with an MD greater than or equal to the one for the given sample, assuming normally distributed data. The smaller the p-value, the less trustworthy the prediction. For highly non-normal X properties (e.g., fingerprints), the MD p-value is wildly inaccurate.

## Structural Similar Compounds

| Name               | Fluvastatin                                                         | Metoclopramide                                                      | Flecainide                                                          |
|--------------------|---------------------------------------------------------------------|---------------------------------------------------------------------|---------------------------------------------------------------------|
| Structure          |                                                                     |                                                                     |                                                                     |
| Actual Endpoint    | Carcinogen                                                          | Non-Carcinogen                                                      | Non-Carcinogen                                                      |
| Predicted Endpoint | Carcinogen                                                          | Non-Carcinogen                                                      | Non-Carcinogen                                                      |
| Distance           | 0.599                                                               | 0.634                                                               | 0.643                                                               |
| Reference          | US FDA (Centre for Drug Eval.& Res./Off. Testing & Res.) Sept. 1997 | US FDA (Centre for Drug Eval.& Res./Off. Testing & Res.) Sept. 1997 | US FDA (Centre for Drug Eval.& Res./Off. Testing & Res.) Sept. 1997 |

## Model Applicability

Unknown features are fingerprint features in the query molecule, but not found or appearing too infrequently in the training set.

1. OPS PC28 out of range. Value: 3.8517. Training min, max, SD, explained variance: -3.142, 3.4791, 1.048, 0.0102.

## Feature Contribution

### Top features for positive contribution

| Fingerprint | Bit/Smiles  | Feature Structure                | Score | Carcinogen in training set |
|-------------|-------------|----------------------------------|-------|----------------------------|
| SCFP_6      | -1971137145 | <br>[*]C(=C[c](:[*]):[*])<br>[*] | 0.434 | 5 out of 9                 |



| SCFP_6                                 | 136686699   | 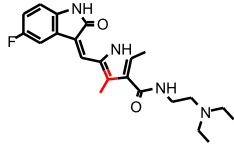<br><chem>[*]:[c](:[*])C</chem>                              | 0.287  | 17 out of 39               |
|----------------------------------------|-------------|-------------------------------------------------------------------------------------------------------------------------------------------------|--------|----------------------------|
| SCFP_6                                 | -1375926917 | <br><chem>[*]N[c]1:[cH]:[*]:[c]<br/>([*]):[cH]:[cH]:1</chem> | 0.251  | 11 out of 26               |
| Top Features for negative contribution |             |                                                                                                                                                 |        |                            |
| Fingerprint                            | Bit/Smiles  | Feature Structure                                                                                                                               | Score  | Carcinogen in training set |
| SCFP_6                                 | 1323614814  | <br><chem>[*]CCNC(=O)[c](:[*]):<br/>[*]</chem>               | -0.825 | 0 out of 4                 |
| SCFP_6                                 | 1798334293  | <br><chem>[*]C(=C1C(=[*])[*])<br/>:[c]1:[*])[*]</chem>      | -0.674 | 0 out of 3                 |
| SCFP_6                                 | -182283812  | <br><chem>[*]CN(C[*])CCN[*]</chem>                         | -0.674 | 0 out of 3                 |

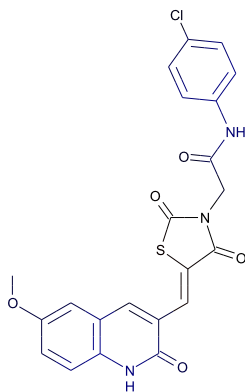

$C_{22}H_{16}ClN_3O_5S$

Molecular Weight: 469.89753

ALogP: 2.815

Rotatable Bonds: 5

Acceptors: 6

Donors: 2

## Model Prediction

Prediction: Non-Irritant

Probability: 0.0465

Enrichment: 0.0505

Bayesian Score: -6.3

Mahalanobis Distance: 13.4

Mahalanobis Distance p-value: 5.13e-009

Prediction: Positive if the Bayesian score is above the estimated best cutoff value from minimizing the false positive and false negative rate.

Probability: The estimated probability that the sample is in the positive category. This assumes that the Bayesian score follows a normal distribution and is different from the prediction using a cutoff.

Enrichment: An estimate of enrichment, that is, the increased likelihood (versus random) of this sample being in the category.

Bayesian Score: The standard Laplacian-modified Bayesian score.

Mahalanobis Distance: The Mahalanobis distance (MD) is the distance to the center of the training data. The larger the MD, the less trustworthy the prediction.

Mahalanobis Distance p-value: The p-value gives the fraction of training data with an MD greater than or equal to the one for the given sample, assuming normally distributed data. The smaller the p-value, the less trustworthy the prediction. For highly non-normal X properties (e.g., fingerprints), the MD p-value is wildly inaccurate.

## Structural Similar Compounds

| Name               | 2-Anthracenesulfonic acid, 1-amino-9,10-dihydro-9,10-dioxo-4-(2,4,6-trimethylanilino)-, monosodium salt                                            | Pregna-1,4-diene-3,20-dione, 21-(acetyloxy)-11-hydroxy-6-methyl-17-(1-oxopropoxy)-, (6- $\alpha$ ,11- $\beta$ )-                                                                 | Benzenesulfonic acid, 2,2'-(4,4'-biphenylenedivinylene)d i-, disodium salt                                |
|--------------------|----------------------------------------------------------------------------------------------------------------------------------------------------|----------------------------------------------------------------------------------------------------------------------------------------------------------------------------------|-----------------------------------------------------------------------------------------------------------|
| Structure          |                                                                                                                                                    |                                                                                                                                                                                  |                                                                                                           |
| Actual Endpoint    | Irritant                                                                                                                                           | Irritant                                                                                                                                                                         | Irritant                                                                                                  |
| Predicted Endpoint | Non-Irritant                                                                                                                                       | Irritant                                                                                                                                                                         | Non-Irritant                                                                                              |
| Distance           | 0.649                                                                                                                                              | 0.777                                                                                                                                                                            | 0.802                                                                                                     |
| Reference          | 85JCAE "Prehled Prumyslove Toxikologie; Organické Latky," Marhold, J., Prague, Czechoslovakia, Avicenum, 1986 Volume(issue)/page/year: -,1327,1986 | YACHDS Yakuri to Chiryō. Pharmacology and Therapeutics. (Raifu Saiensu Shup pan K.K., 2-5-13, Yaesu, Chuo-ku, Tokyo 104, Japan) V.1-1972- Volume(issue) /page/year: 19,3103,1991 | MVCRB3 MVC-Report. (Stockholm, Sweden) No.1-2, 1972-73. Discontinued. Volume(issue)/page/year: 2,193,1973 |

## Model Applicability

Unknown features are fingerprint features in the query molecule, but not found or appearing too infrequently in the training set.

1. All properties and OPS components are within expected ranges.

## Feature Contribution

### Top features for positive contribution

| Fingerprint | Bit/Smiles | Feature Structure | Score | Irritant in training set |
|-------------|------------|-------------------|-------|--------------------------|
|             |            |                   |       |                          |

| FCFP_12                                | -1986158408 | 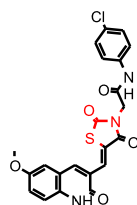<br>[*]N1[*][*]SC1=O                                  | 0.0821 | 13 out of 13             |
|----------------------------------------|-------------|-----------------------------------------------------------------------------------------------------------------------------------------|--------|--------------------------|
| FCFP_12                                | 436886043   | <br>[*]C=C(C=[*])C(=[*])[*]                          | 0.0804 | 129 out of 130           |
| FCFP_12                                | 1383817444  | <br>[*]=CC1=C(c)[c][c][c]:[*]<br>];[c]([*])[*]C1=[*] | 0.0772 | 7 out of 7               |
| Top Features for negative contribution |             |                                                                                                                                         |        |                          |
| Fingerprint                            | Bit/Smiles  | Feature Structure                                                                                                                       | Score  | Irritant in training set |
| FCFP_12                                | 1175665944  | <br>[*]C1=[*][c]([*]):[c]<br>](NC1=O):[cH]:[*]      | -1.02  | 2 out of 8               |
| FCFP_12                                | -1838187238 | <br>[*]C(=[*])N(c)1:[cH]:<br>[cH]:[*]:[cH]:[cH]:1  | -0.692 | 5 out of 12              |

|         |           |                                                                                                                                                                        |       |            |
|---------|-----------|------------------------------------------------------------------------------------------------------------------------------------------------------------------------|-------|------------|
| FCFP_12 | 451043714 | 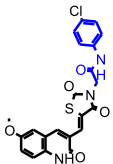 <p data-bbox="1262 272 1465 326">[*]CC(=O)N(c)1:[cH]:[cH]:[c]([*]):[cH]:[cH]:1</p> | -0.65 | 0 out of 1 |
|---------|-----------|------------------------------------------------------------------------------------------------------------------------------------------------------------------------|-------|------------|

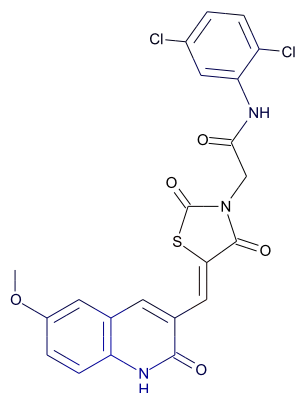

$C_{22}H_{15}Cl_2N_3O_5S$

Molecular Weight: 504.3426

ALogP: 3.479

Rotatable Bonds: 5

Acceptors: 6

Donors: 2

## Model Prediction

Prediction: Non-Irritant

Probability: 0.148

Enrichment: 0.161

Bayesian Score: -5.62

Mahalanobis Distance: 13.5

Mahalanobis Distance p-value: 4.1e-009

Prediction: Positive if the Bayesian score is above the estimated best cutoff value from minimizing the false positive and false negative rate.

Probability: The estimated probability that the sample is in the positive category. This assumes that the Bayesian score follows a normal distribution and is different from the prediction using a cutoff.

Enrichment: An estimate of enrichment, that is, the increased likelihood (versus random) of this sample being in the category.

Bayesian Score: The standard Laplacian-modified Bayesian score.

Mahalanobis Distance: The Mahalanobis distance (MD) is the distance to the center of the training data. The larger the MD, the less trustworthy the prediction.

Mahalanobis Distance p-value: The p-value gives the fraction of training data with an MD greater than or equal to the one for the given sample, assuming normally distributed data. The smaller the p-value, the less trustworthy the prediction. For highly non-normal X properties (e.g., fingerprints), the MD p-value is wildly inaccurate.

## Structural Similar Compounds

| Name               | 2-Anthracenesulfonic acid, 1-amino-9,10-dihydro-9,10-dioxo-4-(2,4,6-trimethylanilino)-, monosodium salt                                            | Benzenesulfonic acid, 2,2'-(4,4'-biphenylylene)divinylene)d i-, disodium salt                             | Pregna-1,4-diene-3,20-dione, 21-(acetyloxy)-11-hydroxy-6-methyl-17-(1-oxopropoxy)-, (6- $\alpha$ ,11- $\beta$ )-                                                                 |
|--------------------|----------------------------------------------------------------------------------------------------------------------------------------------------|-----------------------------------------------------------------------------------------------------------|----------------------------------------------------------------------------------------------------------------------------------------------------------------------------------|
| Structure          |                                                                                                                                                    |                                                                                                           |                                                                                                                                                                                  |
| Actual Endpoint    | Irritant                                                                                                                                           | Irritant                                                                                                  | Irritant                                                                                                                                                                         |
| Predicted Endpoint | Non-Irritant                                                                                                                                       | Non-Irritant                                                                                              | Irritant                                                                                                                                                                         |
| Distance           | 0.718                                                                                                                                              | 0.728                                                                                                     | 0.820                                                                                                                                                                            |
| Reference          | 85JCAE "Prehled Prumyslove Toxikologie; Organicke Latky," Marhold, J., Prague, Czechoslovakia, Avicenum, 1986 Volume(issue)/page/year: -,1327,1986 | MVCRB3 MVC-Report. (Stockholm, Sweden) No.1-2, 1972-73. Discontinued. Volume(issue)/page/year: 2,193,1973 | YACHDS Yakuri to Chiryō. Pharmacology and Therapeutics. (Raifu Saiensu Shup pan K.K., 2-5-13, Yaesu, Chuo-ku, Tokyo 104, Japan) V.1-1972- Volume(issue) /page/year: 19,3103,1991 |

## Model Applicability

Unknown features are fingerprint features in the query molecule, but not found or appearing too infrequently in the training set.

- All properties and OPS components are within expected ranges.

## Feature Contribution

### Top features for positive contribution

| Fingerprint | Bit/Smiles | Feature Structure | Score | Irritant in training set |
|-------------|------------|-------------------|-------|--------------------------|
|             |            |                   |       |                          |

|                                               |                   |                                                                                                                                                 |              |                                 |
|-----------------------------------------------|-------------------|-------------------------------------------------------------------------------------------------------------------------------------------------|--------------|---------------------------------|
| FCFP_12                                       | -1986158408       | 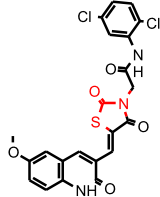<br><chem>[*]N1[*][*]SC1=O</chem>                            | 0.0821       | 13 out of 13                    |
| FCFP_12                                       | 436886043         | <br><chem>[*]C=C(C=[*])C(=[*])[*]</chem>                     | 0.0804       | 129 out of 130                  |
| FCFP_12                                       | 1383817444        | <br><chem>[*]=CC1=C[c](c[CH]:[*]):[c](c[*])[*]C1=[*]</chem>  | 0.0772       | 7 out of 7                      |
| <b>Top Features for negative contribution</b> |                   |                                                                                                                                                 |              |                                 |
| <b>Fingerprint</b>                            | <b>Bit/Smiles</b> | <b>Feature Structure</b>                                                                                                                        | <b>Score</b> | <b>Irritant in training set</b> |
| FCFP_12                                       | 1175665944        | <br><chem>[*]C1=[*][c](c[*]):[c](NC1=O):[cH]:[*]</chem>     | -1.02        | 2 out of 8                      |
| FCFP_12                                       | -1757681964       | <br><chem>[*][c]1:[cH]:[cH]:[c](OC):[cH]:[c]:1C=[*]</chem> | -0.627       | 1 out of 3                      |

|         |            |                                                                                                                                         |        |            |
|---------|------------|-----------------------------------------------------------------------------------------------------------------------------------------|--------|------------|
| FCFP_12 | 1783756416 | 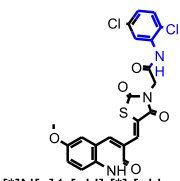<br><chem>[*]N(c1:[cH]:[*]:[cH]:[cH]:[cH]:1Cl</chem> | -0.509 | 4 out of 8 |
|---------|------------|-----------------------------------------------------------------------------------------------------------------------------------------|--------|------------|

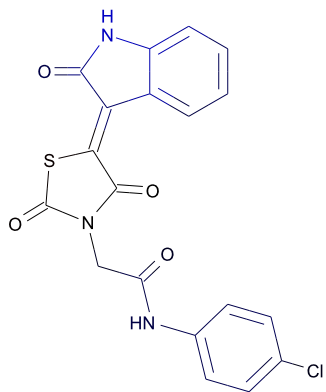

$C_{19}H_{12}ClN_3O_4S$

Molecular Weight: 413.83428

ALogP: 2.363

Rotatable Bonds: 3

Acceptors: 5

Donors: 2

## Model Prediction

Prediction: Non-Irritant

Probability: 0.0408

Enrichment: 0.0443

Bayesian Score: -6.37

Mahalanobis Distance: 11.4

Mahalanobis Distance p-value: 0.000388

Prediction: Positive if the Bayesian score is above the estimated best cutoff value from minimizing the false positive and false negative rate.

Probability: The estimated probability that the sample is in the positive category. This assumes that the Bayesian score follows a normal distribution and is different from the prediction using a cutoff.

Enrichment: An estimate of enrichment, that is, the increased likelihood (versus random) of this sample being in the category.

Bayesian Score: The standard Laplacian-modified Bayesian score.

Mahalanobis Distance: The Mahalanobis distance (MD) is the distance to the center of the training data. The larger the MD, the less trustworthy the prediction.

Mahalanobis Distance p-value: The p-value gives the fraction of training data with an MD greater than or equal to the one for the given sample, assuming normally distributed data. The smaller the p-value, the less trustworthy the prediction. For highly non-normal X properties (e.g., fingerprints), the MD p-value is wildly inaccurate.

## Structural Similar Compounds

| Name               | 2-Anthracenesulfonic acid, 1-amino-9,10-dihydro-9,10-dioxo-4-(2,4,6-trimethylanilino)-, monosodium salt                                            | Benzenesulfonic acid, 2-anilino-5-nitro-                                                                                                           | 5-Norbornene-2,3-dicarboxylic acid, 1,4,5,6,7,7-hexachloro-                                                                                       |
|--------------------|----------------------------------------------------------------------------------------------------------------------------------------------------|----------------------------------------------------------------------------------------------------------------------------------------------------|---------------------------------------------------------------------------------------------------------------------------------------------------|
| Structure          |                                                                                                                                                    |                                                                                                                                                    |                                                                                                                                                   |
| Actual Endpoint    | Irritant                                                                                                                                           | Irritant                                                                                                                                           | Irritant                                                                                                                                          |
| Predicted Endpoint | Non-Irritant                                                                                                                                       | Non-Irritant                                                                                                                                       | Irritant                                                                                                                                          |
| Distance           | 0.683                                                                                                                                              | 0.763                                                                                                                                              | 0.773                                                                                                                                             |
| Reference          | 85JCAE "Prehled Prumyslove Toxikologie; Organicke Latky," Marhold, J., Prague, Czechoslovakia, Avicenum, 1986 Volume(issue)/page/year: -,1327,1986 | 85JCAE "Prehled Prumyslove Toxikologie; Organicke Latky," Marhold, J., Prague, Czechoslovakia, Avicenum, 1986 Volume(issue)/page/year: -,1061,1986 | 85JCAE "Prehled Prumyslove Toxikologie; Organicke Latky," Marhold, J., Prague, Czechoslovakia, Avicenum, 1986 Volume(issue)/page/year: -,581,1986 |

## Model Applicability

Unknown features are fingerprint features in the query molecule, but not found or appearing too infrequently in the training set.

- All properties and OPS components are within expected ranges.

## Feature Contribution

### Top features for positive contribution

| Fingerprint | Bit/Smiles | Feature Structure | Score | Irritant in training set |
|-------------|------------|-------------------|-------|--------------------------|
|             |            |                   |       |                          |



|                                               |                   |                                                                                                                                    |              |                                 |
|-----------------------------------------------|-------------------|------------------------------------------------------------------------------------------------------------------------------------|--------------|---------------------------------|
| FCFP_12                                       | -1986158408       | 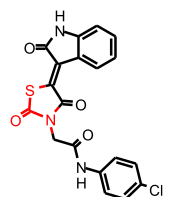<br>[*]N1[*][*]SC1=O                             | 0.0821       | 13 out of 13                    |
| FCFP_12                                       | 436915834         | <br>[*]C=C1/S[*][*]C1=[*]                       | 0.0756       | 6 out of 6                      |
| FCFP_12                                       | -1143715940       | <br>[*]=C1[*][*]C(=[*])S1                       | 0.0575       | 475 out of 490                  |
| <b>Top Features for negative contribution</b> |                   |                                                                                                                                    |              |                                 |
| <b>Fingerprint</b>                            | <b>Bit/Smiles</b> | <b>Feature Structure</b>                                                                                                           | <b>Score</b> | <b>Irritant in training set</b> |
| FCFP_12                                       | 1175665944        | <br>[*]C1=[*][c]([*]):[c]([*])N(C1=O):[cH]:[*] | -1.02        | 2 out of 8                      |
| FCFP_12                                       | -1838187238       | <br>[*]C(=[*])N[c]1:[cH]:[cH]:[*]:[cH]:[cH]:1 | -0.692       | 5 out of 12                     |

|         |           |                                                                                                                                                                        |       |            |
|---------|-----------|------------------------------------------------------------------------------------------------------------------------------------------------------------------------|-------|------------|
| FCFP_12 | 451043714 | 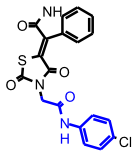 <p data-bbox="1262 272 1392 326">[*]CC(=O)N(c)1:[cH]:[cH]:[c]([*]):[cH]:[cH]:1</p> | -0.65 | 0 out of 1 |
|---------|-----------|------------------------------------------------------------------------------------------------------------------------------------------------------------------------|-------|------------|

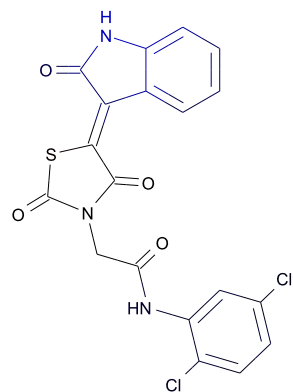

$C_{19}H_{11}Cl_2N_3O_4S$

Molecular Weight: 448.27933

ALogP: 3.028

Rotatable Bonds: 3

Acceptors: 5

Donors: 2

## Model Prediction

Prediction: Non-Irritant

Probability: 0.133

Enrichment: 0.145

Bayesian Score: -5.69

Mahalanobis Distance: 11.5

Mahalanobis Distance p-value: 0.000313

Prediction: Positive if the Bayesian score is above the estimated best cutoff value from minimizing the false positive and false negative rate.

Probability: The estimated probability that the sample is in the positive category. This assumes that the Bayesian score follows a normal distribution and is different from the prediction using a cutoff.

Enrichment: An estimate of enrichment, that is, the increased likelihood (versus random) of this sample being in the category.

Bayesian Score: The standard Laplacian-modified Bayesian score.

Mahalanobis Distance: The Mahalanobis distance (MD) is the distance to the center of the training data. The larger the MD, the less trustworthy the prediction.

Mahalanobis Distance p-value: The p-value gives the fraction of training data with an MD greater than or equal to the one for the given sample, assuming normally distributed data. The smaller the p-value, the less trustworthy the prediction. For highly non-normal X properties (e.g., fingerprints), the MD p-value is wildly inaccurate.

## Structural Similar Compounds

| Name               | 2-Anthracenesulfonic acid, 1-amino-9,10-dihydro-9,10-dioxo-4-(2,4,6-trimethylanilino)-, monosodium salt                                            | 5-Norbornene-2,3-dicarboxylic acid, 1,4,5,6,7,7-hexachloro-                                                                                       | 1-Amino-2-bromo-4-hydroxyanthraquinone |
|--------------------|----------------------------------------------------------------------------------------------------------------------------------------------------|---------------------------------------------------------------------------------------------------------------------------------------------------|----------------------------------------|
| Structure          |                                                                                                                                                    |                                                                                                                                                   |                                        |
| Actual Endpoint    | Irritant                                                                                                                                           | Irritant                                                                                                                                          | Non-Irritant                           |
| Predicted Endpoint | Non-Irritant                                                                                                                                       | Irritant                                                                                                                                          | Non-Irritant                           |
| Distance           | 0.695                                                                                                                                              | 0.791                                                                                                                                             | 0.824                                  |
| Reference          | 85JCAE "Prehled Prumyslove Toxikologie; Organicke Latky," Marhold, J., Prague, Czechoslovakia, Avicenum, 1986 Volume(issue)/page/year: -,1327,1986 | 85JCAE "Prehled Prumyslove Toxikologie; Organicke Latky," Marhold, J., Prague, Czechoslovakia, Avicenum, 1986 Volume(issue)/page/year: -,581,1986 | 28ZPAK -,83,72                         |

## Model Applicability

Unknown features are fingerprint features in the query molecule, but not found or appearing too infrequently in the training set.

1. All properties and OPS components are within expected ranges.

## Feature Contribution

### Top features for positive contribution

| Fingerprint | Bit/Smiles | Feature Structure | Score | Irritant in training set |
|-------------|------------|-------------------|-------|--------------------------|
|             |            |                   |       |                          |

|                                               |                   |                                                                                                                                             |              |                                 |
|-----------------------------------------------|-------------------|---------------------------------------------------------------------------------------------------------------------------------------------|--------------|---------------------------------|
| FCFP_12                                       | 1986158408        | 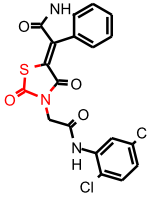<br><chem>[*]N1[*][*]SC1=O</chem>                        | 0.0821       | 13 out of 13                    |
| FCFP_12                                       | 436915834         | <br><chem>[*]C=C1/S[*][*]C1=[*]</chem>                   | 0.0756       | 6 out of 6                      |
| FCFP_12                                       | 562194858         | <br><chem>[*][c]1:[cH]:[c](Cl):[cH]:[cH]:[c]:1Cl</chem>  | 0.0583       | 2 out of 2                      |
| <b>Top Features for negative contribution</b> |                   |                                                                                                                                             |              |                                 |
| <b>Fingerprint</b>                            | <b>Bit/Smiles</b> | <b>Feature Structure</b>                                                                                                                    | <b>Score</b> | <b>Irritant in training set</b> |
| FCFP_12                                       | 1175665944        | <br><chem>[*]C1=[*][c](:[*]):[c](NC1=O):[cH]:[*]</chem> | -1.02        | 2 out of 8                      |
| FCFP_12                                       | 1783756416        | <br><chem>[*]N[c]1:[cH]:[*]:[cH]:[cH]:[c]:1Cl</chem>   | -0.509       | 4 out of 8                      |

|         |            |                                                                                                                                                             |        |              |
|---------|------------|-------------------------------------------------------------------------------------------------------------------------------------------------------------|--------|--------------|
| FCFP_12 | 1294255210 | 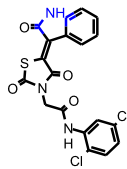<br><chem>[*]C(=[*])N(c1cc2cc(Cl)cc(Cl)c2c1):</chem><br><chem>[*]</chem> | -0.486 | 12 out of 22 |
|---------|------------|-------------------------------------------------------------------------------------------------------------------------------------------------------------|--------|--------------|

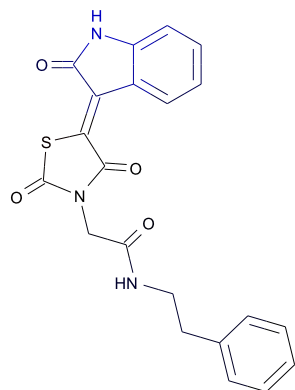

$C_{21}H_{17}N_3O_4S$

Molecular Weight: 407.44237

ALogP: 2.027

Rotatable Bonds: 5

Acceptors: 5

Donors: 2

## Model Prediction

Prediction: Non-Irritant

Probability: 0.189

Enrichment: 0.205

Bayesian Score: -5.45

Mahalanobis Distance: 12

Mahalanobis Distance p-value: 2.07e-005

Prediction: Positive if the Bayesian score is above the estimated best cutoff value from minimizing the false positive and false negative rate.

Probability: The estimated probability that the sample is in the positive category. This assumes that the Bayesian score follows a normal distribution and is different from the prediction using a cutoff.

Enrichment: An estimate of enrichment, that is, the increased likelihood (versus random) of this sample being in the category.

Bayesian Score: The standard Laplacian-modified Bayesian score.

Mahalanobis Distance: The Mahalanobis distance (MD) is the distance to the center of the training data. The larger the MD, the less trustworthy the prediction.

Mahalanobis Distance p-value: The p-value gives the fraction of training data with an MD greater than or equal to the one for the given sample, assuming normally distributed data. The smaller the p-value, the less trustworthy the prediction. For highly non-normal X properties (e.g., fingerprints), the MD p-value is wildly inaccurate.

## Structural Similar Compounds

| Name               | 2-Anthracenesulfonic acid, 1-amino-9,10-dihydro-9,10-dioxo-4-(2,4,6-trimethylanilino)-, monosodium salt                                            | Benzenesulfonic acid, 2-anilino-5-nitro-                                                                                                           | Benzenesulfonamide, 4-amino-N-(5,6-dimethoxy-4-pyrimidinyl)- |
|--------------------|----------------------------------------------------------------------------------------------------------------------------------------------------|----------------------------------------------------------------------------------------------------------------------------------------------------|--------------------------------------------------------------|
| Structure          |                                                                                                                                                    |                                                                                                                                                    |                                                              |
| Actual Endpoint    | Irritant                                                                                                                                           | Irritant                                                                                                                                           | Irritant                                                     |
| Predicted Endpoint | Non-Irritant                                                                                                                                       | Non-Irritant                                                                                                                                       | Non-Irritant                                                 |
| Distance           | 0.705                                                                                                                                              | 0.765                                                                                                                                              | 0.784                                                        |
| Reference          | 85JCAE "Prehled Prumyslove Toxikologie; Organicke Latky," Marhold, J., Prague, Czechoslovakia, Avicenum, 1986 Volume(issue)/page/year: -,1327,1986 | 85JCAE "Prehled Prumyslove Toxikologie; Organicke Latky," Marhold, J., Prague, Czechoslovakia, Avicenum, 1986 Volume(issue)/page/year: -,1061,1986 | FCTXAV 14,307,76                                             |

## Model Applicability

Unknown features are fingerprint features in the query molecule, but not found or appearing too infrequently in the training set.

- All properties and OPS components are within expected ranges.

## Feature Contribution

### Top features for positive contribution

| Fingerprint | Bit/Smiles | Feature Structure | Score | Irritant in training set |
|-------------|------------|-------------------|-------|--------------------------|
|             |            |                   |       |                          |

|                                               |                   |                                                                                                                                             |              |                                 |
|-----------------------------------------------|-------------------|---------------------------------------------------------------------------------------------------------------------------------------------|--------------|---------------------------------|
| FCFP_12                                       | -1986158408       | 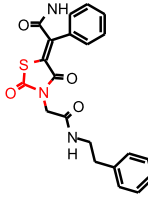<br><chem>[*]N1[*][*]SC1=O</chem>                        | 0.0821       | 13 out of 13                    |
| FCFP_12                                       | 436915834         | <br><chem>[*]C=C1/S[*][*]C1=[*]</chem>                   | 0.0756       | 6 out of 6                      |
| FCFP_12                                       | -1143715940       | <br><chem>[*]=C1[*][*]C(=[*])S1</chem>                   | 0.0575       | 475 out of 490                  |
| <b>Top Features for negative contribution</b> |                   |                                                                                                                                             |              |                                 |
| <b>Fingerprint</b>                            | <b>Bit/Smiles</b> | <b>Feature Structure</b>                                                                                                                    | <b>Score</b> | <b>Irritant in training set</b> |
| FCFP_12                                       | 1175665944        | <br><chem>[*]C1=[*][c](:[*]):[c](NC1=O):[cH]:[*]</chem> | -1.02        | 2 out of 8                      |
| FCFP_12                                       | -2002900105       | <br><chem>[*]NCC[c](:[cH]:[*]):[cH]:[*]</chem>         | -0.65        | 0 out of 1                      |

|         |            |                                                                                                                               |        |              |
|---------|------------|-------------------------------------------------------------------------------------------------------------------------------|--------|--------------|
| FCFP_12 | 1294255210 | 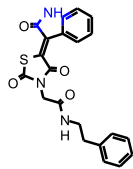<br><chem>*C(=*)N[C](:[*]):<br/>[*]</chem> | -0.486 | 12 out of 22 |
|---------|------------|-------------------------------------------------------------------------------------------------------------------------------|--------|--------------|



# Sorafenib

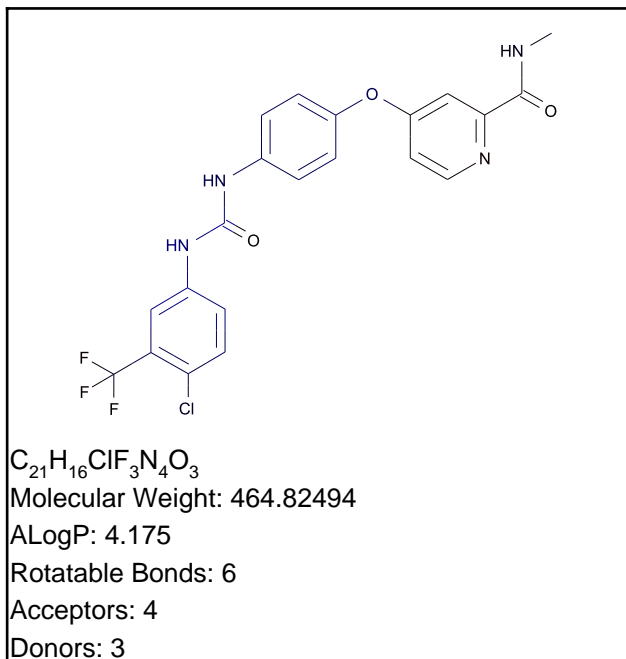

## Model Prediction

Prediction: Non-Irritant

Probability: 0.264

Enrichment: 0.287

Bayesian Score: -5.23

Mahalanobis Distance: 8.27

Mahalanobis Distance p-value: 0.791

Prediction: Positive if the Bayesian score is above the estimated best cutoff value from minimizing the false positive and false negative rate.

Probability: The estimated probability that the sample is in the positive category. This assumes that the Bayesian score follows a normal distribution and is different from the prediction using a cutoff.

Enrichment: An estimate of enrichment, that is, the increased likelihood (versus random) of this sample being in the category.

Bayesian Score: The standard Laplacian-modified Bayesian score.

Mahalanobis Distance: The Mahalanobis distance (MD) is the distance to the center of the training data. The larger the MD, the less trustworthy the prediction.

Mahalanobis Distance p-value: The p-value gives the fraction of training data with an MD greater than or equal to the one for the given sample, assuming normally distributed data. The smaller the p-value, the less trustworthy the prediction. For highly non-normal X properties (e.g., fingerprints), the MD p-value is wildly inaccurate.

# TOPKAT\_Skin\_Irritancy\_None\_vs\_Irritant

## Structural Similar Compounds

| Name               | 5-Norbornene-2,3-dicarboxylic acid, 1,4,5,6,7,7-hexachloro-                                                                                          | Benzenesulfonic acid, 2,2'-(4,4'-biphenylylene)di-, disodium salt                                         | Sulfide, bis(4-t-butyl-m-cresyl)-                                                                                                                                              |
|--------------------|------------------------------------------------------------------------------------------------------------------------------------------------------|-----------------------------------------------------------------------------------------------------------|--------------------------------------------------------------------------------------------------------------------------------------------------------------------------------|
| Structure          | 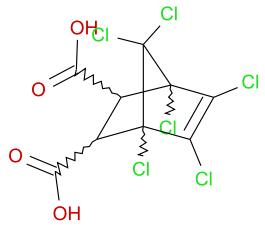                                                                  |                        |                                                                                             |
| Actual Endpoint    | Irritant                                                                                                                                             | Irritant                                                                                                  | Irritant                                                                                                                                                                       |
| Predicted Endpoint | Irritant                                                                                                                                             | Non-Irritant                                                                                              | Irritant                                                                                                                                                                       |
| Distance           | 0.844                                                                                                                                                | 0.871                                                                                                     | 0.884                                                                                                                                                                          |
| Reference          | 85JCAE "Prehled Prumyslove Toxikologie; Organické Latky," Marhold, J., Prague, Czechoslovakia, Avicenum, 1986<br>Volume(issue)/page/year: -,581,1986 | MVCRB3 MVC-Report. (Stockholm, Sweden) No.1-2, 1972-73. Discontinued. Volume(issue)/page/year: 2,193,1973 | AMIHBC AMA Archives of Industrial Hygiene and Occupational Medicine. (Chicago, IL) V.2-10, 1950-54. For publisher information, see AEHLAU. Volume(issue)/page/year: 5,311,1952 |

## Model Applicability

Unknown features are fingerprint features in the query molecule, but not found or appearing too infrequently in the training set.

1. All properties and OPS components are within expected ranges.

## Feature Contribution

### Top features for positive contribution

| Fingerprint | Bit/Smiles | Feature Structure | Score | Irritant in training set |
|-------------|------------|-------------------|-------|--------------------------|
|             |            |                   |       |                          |

|                                               |                   |                                                                                                                                         |              |                                 |
|-----------------------------------------------|-------------------|-----------------------------------------------------------------------------------------------------------------------------------------|--------------|---------------------------------|
| FCFP_12                                       | -124655670        | 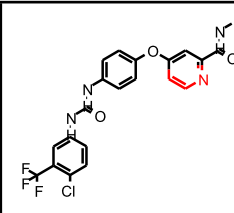<br>[*]:[cH]:[cH]:n:[*]                               | 0.0821       | 13 out of 13                    |
| FCFP_12                                       | -1539132615       | <br>[*]C(=[*])[c](-[cH]:[*]):n:[*]                   | 0.0795       | 9 out of 9                      |
| FCFP_12                                       | -1695756380       | <br>[*][c]1:[*]:[c]([*]):n:[cH]:[cH]:1               | 0.0772       | 7 out of 7                      |
| <b>Top Features for negative contribution</b> |                   |                                                                                                                                         |              |                                 |
| <b>Fingerprint</b>                            | <b>Bit/Smiles</b> | <b>Feature Structure</b>                                                                                                                | <b>Score</b> | <b>Irritant in training set</b> |
| FCFP_12                                       | -789307649        | <br>[*]O[c]1:[cH]:[cH]:[c](NC(=[*])[*]):[cH]:[cH]:1 | -1.54        | 0 out of 4                      |
| FCFP_12                                       | -1838187238       | <br>[*]C(=[*])N[c]1:[cH]:[cH]:[*]:[cH]:[cH]:1      | -0.692       | 5 out of 12                     |

|         |            |                                                                                                                                               |        |              |
|---------|------------|-----------------------------------------------------------------------------------------------------------------------------------------------|--------|--------------|
| FCFP_12 | 1294255210 | 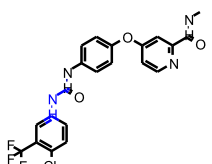<br><chem>[*]C(=[*])N(c(:[*])):</chem><br><chem>[*]</chem> | -0.486 | 12 out of 22 |
|---------|------------|-----------------------------------------------------------------------------------------------------------------------------------------------|--------|--------------|

# Sunitinib

# TOPKAT\_Skin\_Irritancy\_None\_vs\_Irritant

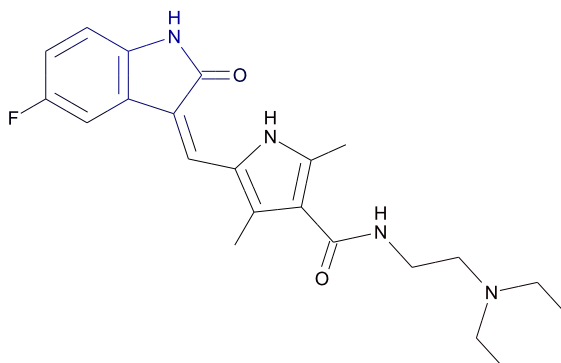

$C_{22}H_{27}FN_4O_2$

Molecular Weight: 398.47378

ALogP: 2.997

Rotatable Bonds: 7

Acceptors: 3

Donors: 3

## Model Prediction

Prediction: Non-Irritant

Probability: 0.856

Enrichment: 0.93

Bayesian Score: -3.16

Mahalanobis Distance: 10.1

Mahalanobis Distance p-value: 0.0541

Prediction: Positive if the Bayesian score is above the estimated best cutoff value from minimizing the false positive and false negative rate.

Probability: The estimated probability that the sample is in the positive category. This assumes that the Bayesian score follows a normal distribution and is different from the prediction using a cutoff.

Enrichment: An estimate of enrichment, that is, the increased likelihood (versus random) of this sample being in the category.

Bayesian Score: The standard Laplacian-modified Bayesian score.

Mahalanobis Distance: The Mahalanobis distance (MD) is the distance to the center of the training data. The larger the MD, the less trustworthy the prediction.

Mahalanobis Distance p-value: The p-value gives the fraction of training data with an MD greater than or equal to the one for the given sample, assuming normally distributed data. The smaller the p-value, the less trustworthy the prediction. For highly non-normal X properties (e.g., fingerprints), the MD p-value is wildly inaccurate.

## Structural Similar Compounds

| Name               | 5-Norbornene-2,3-dicarboxylic acid, 1,4,5,6,7,7-hexachloro-                                                                                       | Sulfide, bis(4-t-butyl-m-cresyl)-                                                                                                                                              | p-Acetophenetidine, 3'-(bis(2-hydroxyethyl)amino)- |
|--------------------|---------------------------------------------------------------------------------------------------------------------------------------------------|--------------------------------------------------------------------------------------------------------------------------------------------------------------------------------|----------------------------------------------------|
| Structure          |                                                                                                                                                   |                                                                                                                                                                                |                                                    |
| Actual Endpoint    | Irritant                                                                                                                                          | Irritant                                                                                                                                                                       | Non-Irritant                                       |
| Predicted Endpoint | Irritant                                                                                                                                          | Irritant                                                                                                                                                                       | Non-Irritant                                       |
| Distance           | 0.818                                                                                                                                             | 0.860                                                                                                                                                                          | 0.863                                              |
| Reference          | 85JCAE "Prehled Prumyslove Toxikologie; Organicke Latky," Marhold, J., Prague, Czechoslovakia, Avicenum, 1986 Volume(issue)/page/year: -,581,1986 | AMIHBC AMA Archives of Industrial Hygiene and Occupational Medicine. (Chicago, IL) V.2-10, 1950-54. For publisher information, see AEHLAU. Volume(issue)/page/year: 5,311,1952 | 28ZPAK -,100,72                                    |

## Model Applicability

Unknown features are fingerprint features in the query molecule, but not found or appearing too infrequently in the training set.

1. All properties and OPS components are within expected ranges.
2. Unknown FCFP\_2 feature: 203707511: [\*][c]1:[\*]:[\*]:[nH]:[c]:1C=[\*]

## Feature Contribution

### Top features for positive contribution

| Fingerprint | Bit/Smiles | Feature Structure | Score | Irritant in training set |
|-------------|------------|-------------------|-------|--------------------------|
|             |            |                   |       |                          |

|                                               |                   |                                                                                                                                             |              |                                 |
|-----------------------------------------------|-------------------|---------------------------------------------------------------------------------------------------------------------------------------------|--------------|---------------------------------|
| FCFP_12                                       | 1852108031        | 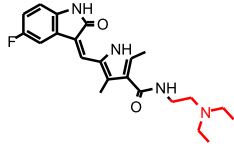<br><chem>[*]CCN(CC)CC</chem>                            | 0.0841       | 19 out of 19                    |
| FCFP_12                                       | 1851332093        | <br><chem>[*]CN(C[*])CC</chem>                           | 0.0795       | 9 out of 9                      |
| FCFP_12                                       | -371808660        | <br><chem>[*]CN(C[*])CCN[*]</chem>                       | 0.0785       | 8 out of 8                      |
| <b>Top Features for negative contribution</b> |                   |                                                                                                                                             |              |                                 |
| <b>Fingerprint</b>                            | <b>Bit/Smiles</b> | <b>Feature Structure</b>                                                                                                                    | <b>Score</b> | <b>Irritant in training set</b> |
| FCFP_12                                       | 1175665944        | <br><chem>[*]C1=[*][c](:[*]):[c](NC1=O):[cH]:[*]</chem> | -1.02        | 2 out of 8                      |
| FCFP_12                                       | 1294255210        | <br><chem>[*]C=[*]N[c](:[*]):[*]</chem>                | -0.486       | 12 out of 22                    |

|         |            |                                                                                                                                                  |        |              |
|---------|------------|--------------------------------------------------------------------------------------------------------------------------------------------------|--------|--------------|
| FCFP_12 | -773983804 | 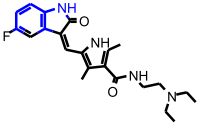<br><chem>C1CCN(CC1)CNC2=C(C)C(=O)N2C(=O)N3C=CC=C(F)N3</chem> | -0.444 | 46 out of 79 |
|---------|------------|--------------------------------------------------------------------------------------------------------------------------------------------------|--------|--------------|

10a

TOPKAT\_Carcinogenic\_Potency\_TD50\_Mouse

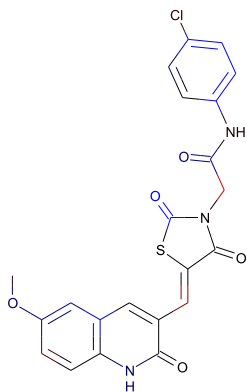
 $C_{22}H_{16}ClN_3O_5S$ 

Molecular Weight: 469.89753

ALogP: 2.815

Rotatable Bonds: 5

Acceptors: 6

Donors: 2

### Model Prediction

Prediction: 25.8

Unit: mg/kg\_body\_weight/day

Mahalanobis Distance: 14.4

Mahalanobis Distance p-value: 3.05e-011

Mahalanobis Distance: The Mahalanobis distance (MD) is a generalization of the Euclidean distance that accounts for correlations among the X properties. It is calculated as the distance to the center of the training data. The larger the MD, the less trustworthy the prediction.

Mahalanobis Distance p-value: The p-value gives the fraction of training data with an MD greater than or equal to the one for the given sample, assuming normally distributed data. The smaller the p-value, the less trustworthy the prediction. For highly non-normal X properties (e.g., fingerprints), the MD p-value is wildly inaccurate.

### Structural Similar Compounds

| Name                        | Ochratoxin A | 542     | 470     |
|-----------------------------|--------------|---------|---------|
| Structure                   |              |         |         |
| Actual Endpoint (-log C)    | 4.79932      | 4.79932 | 4.62839 |
| Predicted Endpoint (-log C) | 3.6353       | 3.6353  | 3.93264 |
| Distance                    | 0.650        | 0.650   | 0.710   |
| Reference                   | CPDB         | CPDB    | CPDB    |

### Model Applicability

Unknown features are fingerprint features in the query molecule, but not found or appearing too infrequently in the training set.

1. All properties and OPS components are within expected ranges.
2. Unknown ECFP\_2 feature: 2131425032: [\*]C=C(\C=[\*])/C(=[\*])[\*]
3. Unknown ECFP\_2 feature: 1182722866: [\*]C(=CC(=[\*])[\*])[\*]
4. Unknown ECFP\_2 feature: 1000552169: [\*]C=C\1/S[\*][\*]C1=[\*]
5. Unknown ECFP\_2 feature: -661097313: [\*]CN1C(=[\*])[\*][\*]C1=[\*]
6. Unknown ECFP\_2 feature: -37698365: [\*]N([\*])CC(=[\*])[\*]

### Feature Contribution

#### Top features for positive contribution

| Fingerprint | Bit/Smiles | Feature Structure | Score |
|-------------|------------|-------------------|-------|
| ECFP_6      | 1559650422 |                   | 0.203 |

|                                               |                   |                                                                                                                          |              |
|-----------------------------------------------|-------------------|--------------------------------------------------------------------------------------------------------------------------|--------------|
| ECFP_6                                        | -1925046727       | 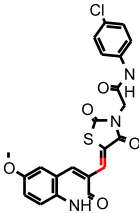<br>[*]C=[*]                          | 0.145        |
| ECFP_6                                        | -817402818        | <br>[*]Cl                             | 0.129        |
| <b>Top Features for negative contribution</b> |                   |                                                                                                                          |              |
| <b>Fingerprint</b>                            | <b>Bit/Smiles</b> | <b>Feature Structure</b>                                                                                                 | <b>Score</b> |
| ECFP_6                                        | 2106656448        | <br>[*]C(=O)[*]                       | -0.275       |
| ECFP_6                                        | 1996767644        | <br>[*][c](:[*]):[cH]:[cH]<br>]:[*] | -0.251       |
| ECFP_6                                        | 642810091         | <br>[*][c](:[*]):[*]                | -0.247       |





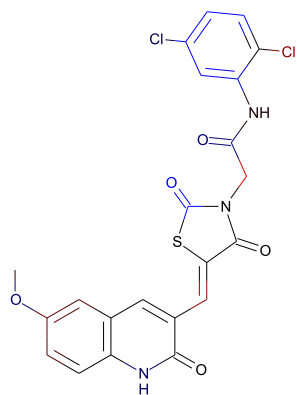

$C_{22}H_{15}Cl_2N_3O_5S$

Molecular Weight: 504.3426

ALogP: 3.479

Rotatable Bonds: 5

Acceptors: 6

Donors: 2

### Model Prediction

Prediction: 20.3

Unit: mg/kg\_body\_weight/day

Mahalanobis Distance: 14.4

Mahalanobis Distance p-value: 2.77e-011

Mahalanobis Distance: The Mahalanobis distance (MD) is a generalization of the Euclidean distance that accounts for correlations among the X properties. It is calculated as the distance to the center of the training data. The larger the MD, the less trustworthy the prediction.

Mahalanobis Distance p-value: The p-value gives the fraction of training data with an MD greater than or equal to the one for the given sample, assuming normally distributed data. The smaller the p-value, the less trustworthy the prediction. For highly non-normal X properties (e.g., fingerprints), the MD p-value is wildly inaccurate.

### Structural Similar Compounds

| Name                        | Ochratoxin A | 542     | 470     |
|-----------------------------|--------------|---------|---------|
| Structure                   |              |         |         |
| Actual Endpoint (-log C)    | 4.79932      | 4.79932 | 4.62839 |
| Predicted Endpoint (-log C) | 3.6353       | 3.6353  | 3.93264 |
| Distance                    | 0.665        | 0.665   | 0.748   |
| Reference                   | CPDB         | CPDB    | CPDB    |

### Model Applicability

Unknown features are fingerprint features in the query molecule, but not found or appearing too infrequently in the training set.

1. All properties and OPS components are within expected ranges.
2. Unknown ECFP\_2 feature: 2131425032: [\*]C=C(\C=[\*])/C(=[\*])[\*]
3. Unknown ECFP\_2 feature: 1182722866: [\*]C(=CC(=[\*])[\*])[\*]
4. Unknown ECFP\_2 feature: 1000552169: [\*]C=C\1/S[\*][\*]C1=[\*]
5. Unknown ECFP\_2 feature: -661097313: [\*]CN1C(=[\*])[\*][\*]C1=[\*]
6. Unknown ECFP\_2 feature: -37698365: [\*]N([\*])CC(=[\*])[\*]

### Feature Contribution

#### Top features for positive contribution

| Fingerprint | Bit/Smiles | Feature Structure | Score |
|-------------|------------|-------------------|-------|
| ECFP_6      | 1559650422 |                   | 0.203 |

|                                               |                   |                                                                                                                          |              |
|-----------------------------------------------|-------------------|--------------------------------------------------------------------------------------------------------------------------|--------------|
| ECFP_6                                        | -1925046727       | 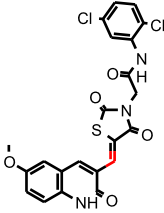<br>[*]C=[*]                          | 0.145        |
| ECFP_6                                        | -817402818        | <br>[*]Cl                             | 0.129        |
| <b>Top Features for negative contribution</b> |                   |                                                                                                                          |              |
| <b>Fingerprint</b>                            | <b>Bit/Smiles</b> | <b>Feature Structure</b>                                                                                                 | <b>Score</b> |
| ECFP_6                                        | 2106656448        | <br>[*]C(=O)[*]                       | -0.275       |
| ECFP_6                                        | 1996767644        | <br>[*][c](:[*]):[cH]:[cH]:[cH]:[*] | -0.251       |
| ECFP_6                                        | 642810091         | <br>[*][c](:[*]):[*]                | -0.247       |



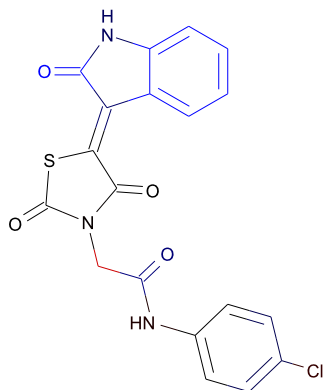

$C_{19}H_{12}ClN_3O_4S$

Molecular Weight: 413.83428

ALogP: 2.363

Rotatable Bonds: 3

Acceptors: 5

Donors: 2

### Model Prediction

Prediction: 54.6

Unit: mg/kg\_body\_weight/day

Mahalanobis Distance: 12.8

Mahalanobis Distance p-value: 3.04e-007

Mahalanobis Distance: The Mahalanobis distance (MD) is a generalization of the Euclidean distance that accounts for correlations among the X properties. It is calculated as the distance to the center of the training data. The larger the MD, the less trustworthy the prediction.

Mahalanobis Distance p-value: The p-value gives the fraction of training data with an MD greater than or equal to the one for the given sample, assuming normally distributed data. The smaller the p-value, the less trustworthy the prediction. For highly non-normal X properties (e.g., fingerprints), the MD p-value is wildly inaccurate.

### Structural Similar Compounds

| Name                        | Ochratoxin A | 542     | 470     |
|-----------------------------|--------------|---------|---------|
| Structure                   |              |         |         |
| Actual Endpoint (-log C)    | 4.79932      | 4.79932 | 4.62839 |
| Predicted Endpoint (-log C) | 3.6353       | 3.6353  | 3.93264 |
| Distance                    | 0.666        | 0.666   | 0.708   |
| Reference                   | CPDB         | CPDB    | CPDB    |

### Model Applicability

Unknown features are fingerprint features in the query molecule, but not found or appearing too infrequently in the training set.

1. All properties and OPS components are within expected ranges.
2. Unknown ECFP\_2 feature: -631778390: [\*]C(=C1S[\*])[\*]C1=[\*])[\*]
3. Unknown ECFP\_2 feature: -661097313: [\*]CN1C(=[\*])[\*][\*]C1=[\*]
4. Unknown ECFP\_2 feature: -37698365: [\*]N([\*])CC(=[\*])[\*]

### Feature Contribution

#### Top features for positive contribution

| Fingerprint | Bit/Smiles | Feature Structure | Score |
|-------------|------------|-------------------|-------|
| ECFP_6      | 1559650422 |                   | 0.203 |

|                                               |                   |                                                                                                                         |              |
|-----------------------------------------------|-------------------|-------------------------------------------------------------------------------------------------------------------------|--------------|
| ECFP_6                                        | -817402818        | 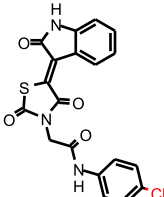<br>[*]Cl                            | 0.129        |
| ECFP_6                                        | -1897341097       | <br>[*]N[*]                          | 0.0284       |
| <b>Top Features for negative contribution</b> |                   |                                                                                                                         |              |
| <b>Fingerprint</b>                            | <b>Bit/Smiles</b> | <b>Feature Structure</b>                                                                                                | <b>Score</b> |
| ECFP_6                                        | 2106656448        | <br>[*]C(=O)[*]                      | -0.275       |
| ECFP_6                                        | 1996767644        | <br>[*][c](:[*]):[cH]:[cH<br>]:[*] | -0.251       |
| ECFP_6                                        | 642810091         | <br>[*][c](:[*]):[*]               | -0.247       |



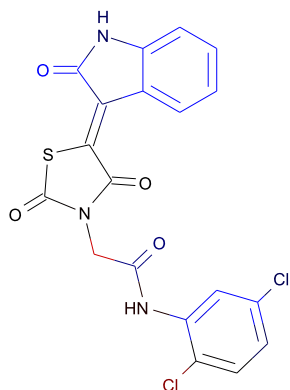

$C_{19}H_{11}Cl_2N_3O_4S$

Molecular Weight: 448.27933

ALogP: 3.028

Rotatable Bonds: 3

Acceptors: 5

Donors: 2

### Model Prediction

Prediction: 71.4

Unit: mg/kg\_body\_weight/day

Mahalanobis Distance: 13.1

Mahalanobis Distance p-value: 6.7e-008

Mahalanobis Distance: The Mahalanobis distance (MD) is a generalization of the Euclidean distance that accounts for correlations among the X properties. It is calculated as the distance to the center of the training data. The larger the MD, the less trustworthy the prediction.

Mahalanobis Distance p-value: The p-value gives the fraction of training data with an MD greater than or equal to the one for the given sample, assuming normally distributed data. The smaller the p-value, the less trustworthy the prediction. For highly non-normal X properties (e.g., fingerprints), the MD p-value is wildly inaccurate.

### Structural Similar Compounds

| Name                        | Ochratoxin A | 542     | C.I. pigment red 3 |
|-----------------------------|--------------|---------|--------------------|
| Structure                   |              |         |                    |
| Actual Endpoint (-log C)    | 4.79932      | 4.79932 | 0.937339           |
| Predicted Endpoint (-log C) | 3.6353       | 3.6353  | 3.17837            |
| Distance                    | 0.657        | 0.657   | 0.727              |
| Reference                   | CPDB         | CPDB    | CPDB               |

### Model Applicability

Unknown features are fingerprint features in the query molecule, but not found or appearing too infrequently in the training set.

1. All properties and OPS components are within expected ranges.
2. Unknown ECFP\_2 feature: -631778390: [\*]C(=C1S[\*])[\*]C1=[\*])[\*]
3. Unknown ECFP\_2 feature: -661097313: [\*]CN1C(=[\*])[\*][\*]C1=[\*]
4. Unknown ECFP\_2 feature: -37698365: [\*]N([\*])CC(=[\*])[\*]

### Feature Contribution

#### Top features for positive contribution

| Fingerprint | Bit/Smiles | Feature Structure | Score |
|-------------|------------|-------------------|-------|
| ECFP_6      | 1559650422 | <br>[*]C[*]       | 0.203 |



|                                               |                   |                                                                                                                          |              |
|-----------------------------------------------|-------------------|--------------------------------------------------------------------------------------------------------------------------|--------------|
| ECFP_6                                        | -817402818        | 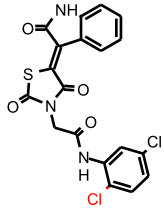<br>[*]Cl                             | 0.129        |
| ECFP_6                                        | -1897341097       | <br>[*]N[*]                           | 0.0284       |
| <b>Top Features for negative contribution</b> |                   |                                                                                                                          |              |
| <b>Fingerprint</b>                            | <b>Bit/Smiles</b> | <b>Feature Structure</b>                                                                                                 | <b>Score</b> |
| ECFP_6                                        | 2106656448        | <br>[*]C(=O)[*]                       | -0.275       |
| ECFP_6                                        | 1996767644        | <br>[*][c](:[*]):[cH]:[cH]:[cH]:[*] | -0.251       |
| ECFP_6                                        | 642810091         | <br>[*][c](:[*]):[*]                | -0.247       |



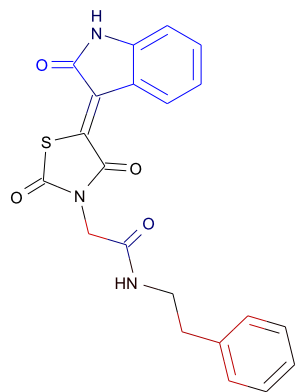

$C_{21}H_{17}N_3O_4S$

Molecular Weight: 407.44237

ALogP: 2.027

Rotatable Bonds: 5

Acceptors: 5

Donors: 2

### Model Prediction

Prediction: 59.4

Unit: mg/kg\_body\_weight/day

Mahalanobis Distance: 11.8

Mahalanobis Distance p-value: 4.61e-005

Mahalanobis Distance: The Mahalanobis distance (MD) is a generalization of the Euclidean distance that accounts for correlations among the X properties. It is calculated as the distance to the center of the training data. The larger the MD, the less trustworthy the prediction.

Mahalanobis Distance p-value: The p-value gives the fraction of training data with an MD greater than or equal to the one for the given sample, assuming normally distributed data. The smaller the p-value, the less trustworthy the prediction. For highly non-normal X properties (e.g., fingerprints), the MD p-value is wildly inaccurate.

### Structural Similar Compounds

| Name                        | Ochratoxin A | 542     | 470     |
|-----------------------------|--------------|---------|---------|
| Structure                   |              |         |         |
| Actual Endpoint (-log C)    | 4.79932      | 4.79932 | 4.62839 |
| Predicted Endpoint (-log C) | 3.6353       | 3.6353  | 3.93264 |
| Distance                    | 0.641        | 0.641   | 0.707   |
| Reference                   | CPDB         | CPDB    | CPDB    |

### Model Applicability

Unknown features are fingerprint features in the query molecule, but not found or appearing too infrequently in the training set.

1. OPS PC22 out of range. Value: 3.9887. Training min, max, SD, explained variance: -3.1587, 3.8589, 1.086, 0.0147.
2. Unknown ECFP\_2 feature: -631778390: [\*]C(=C1S[\*][\*]C1=[\*])[\*]
3. Unknown ECFP\_2 feature: -661097313: [\*]CN1C(=[\*])[\*][\*]C1=[\*]
4. Unknown ECFP\_2 feature: -37698365: [\*]N([\*])CC(=[\*])[\*]

### Feature Contribution

#### Top features for positive contribution

| Fingerprint | Bit/Smiles | Feature Structure | Score |
|-------------|------------|-------------------|-------|
| ECFP_6      | 1559650422 | <br>[*]C[*]       | 0.203 |

|                                               |                   |                                                                                                                                  |              |
|-----------------------------------------------|-------------------|----------------------------------------------------------------------------------------------------------------------------------|--------------|
| ECFP_6                                        | -2024255407       | 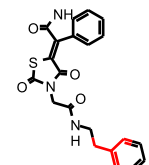<br><chem>[*]C[c](:[cH]:[*]):[cH]:[*]</chem>  | 0.172        |
| ECFP_6                                        | -1897341097       | <br><chem>[*]N[*]</chem>                      | 0.0284       |
| <b>Top Features for negative contribution</b> |                   |                                                                                                                                  |              |
| <b>Fingerprint</b>                            | <b>Bit/Smiles</b> | <b>Feature Structure</b>                                                                                                         | <b>Score</b> |
| ECFP_6                                        | 2106656448        | <br><chem>[*]C(=O)[*]</chem>                  | -0.275       |
| ECFP_6                                        | 1996767644        | <br><chem>[*][c](:[*]):[cH]:[cH]:[*]</chem> | -0.251       |
| ECFP_6                                        | 642810091         | <br><chem>[*][c](:[*]):[*]</chem>           | -0.247       |



# Sorafenib

# TOPKAT\_Carcinogenic\_Potency\_TD50\_Mouse

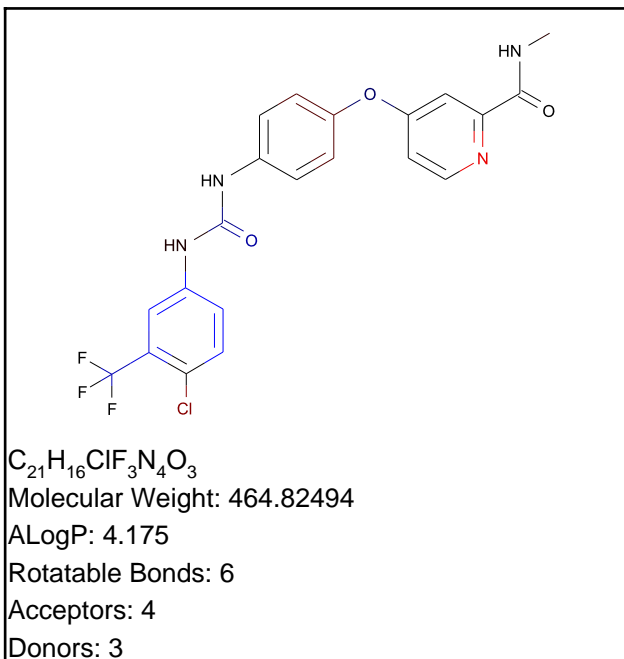

## Model Prediction

Prediction: 19.2

Unit: mg/kg\_body\_weight/day

Mahalanobis Distance: 12.4

Mahalanobis Distance p-value: 2.94e-006

Mahalanobis Distance: The Mahalanobis distance (MD) is a generalization of the Euclidean distance that accounts for correlations among the X properties. It is calculated as the distance to the center of the training data. The larger the MD, the less trustworthy the prediction.

Mahalanobis Distance p-value: The p-value gives the fraction of training data with an MD greater than or equal to the one for the given sample, assuming normally distributed data. The smaller the p-value, the less trustworthy the prediction. For highly non-normal X properties (e.g., fingerprints), the MD p-value is wildly inaccurate.

## Structural Similar Compounds

| Name                        | Ochratoxin A                                                                        | 542                                                                                 | 4-Chloro-6-(2,3-xylylidino)-2-pyridinylthio(N-b-hydroxy-ethyl) acetamide            |
|-----------------------------|-------------------------------------------------------------------------------------|-------------------------------------------------------------------------------------|-------------------------------------------------------------------------------------|
| Structure                   | 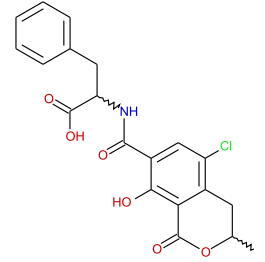 |  |  |
| Actual Endpoint (-log C)    | 4.79932                                                                             | 4.79932                                                                             | 3.91517                                                                             |
| Predicted Endpoint (-log C) | 3.6353                                                                              | 3.6353                                                                              | 3.92186                                                                             |
| Distance                    | 0.718                                                                               | 0.718                                                                               | 0.738                                                                               |
| Reference                   | CPDB                                                                                | CPDB                                                                                | CPDB                                                                                |

## Model Applicability

Unknown features are fingerprint features in the query molecule, but not found or appearing too infrequently in the training set.

- All properties and OPS components are within expected ranges.
- Unknown ECFP\_2 feature: 1338334141: [\*]C(=[\*])NC
- Unknown ECFP\_2 feature: 1413420509: [\*]C(=[\*])[c](:n:[\*]):c:[\*]

## Feature Contribution

### Top features for positive contribution

| Fingerprint | Bit/Smiles | Feature Structure                                                                                  | Score |
|-------------|------------|----------------------------------------------------------------------------------------------------|-------|
| ECFP_6      | 655739385  | 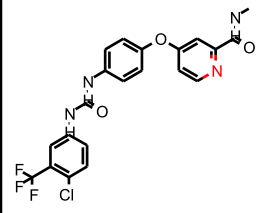<br>[*]:n:[*] | 0.229 |

|                                               |                   |                                                                                                                    |              |
|-----------------------------------------------|-------------------|--------------------------------------------------------------------------------------------------------------------|--------------|
| ECFP_6                                        | -817402818        | 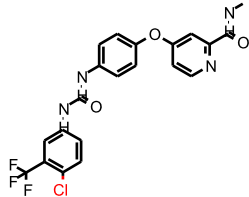<br>[*]Cl                       | 0.129        |
| ECFP_6                                        | -176455838        | <br>[*]O[c](:[cH]:[*]):[cH]:[*] | 0.0818       |
| <b>Top Features for negative contribution</b> |                   |                                                                                                                    |              |
| <b>Fingerprint</b>                            | <b>Bit/Smiles</b> | <b>Feature Structure</b>                                                                                           | <b>Score</b> |
| ECFP_6                                        | 1996767644        | <br>[*][c](:[*]):[cH]:[cH]:[*]  | -0.251       |
| ECFP_6                                        | 642810091         | <br>[*][c](:[*]):[*]          | -0.247       |
| ECFP_6                                        | -182236392        | <br>[*]:[cH]:[*]              | -0.232       |





# Sunitinib

# TOPKAT\_Carcinogenic\_Potency\_TD50\_Mouse

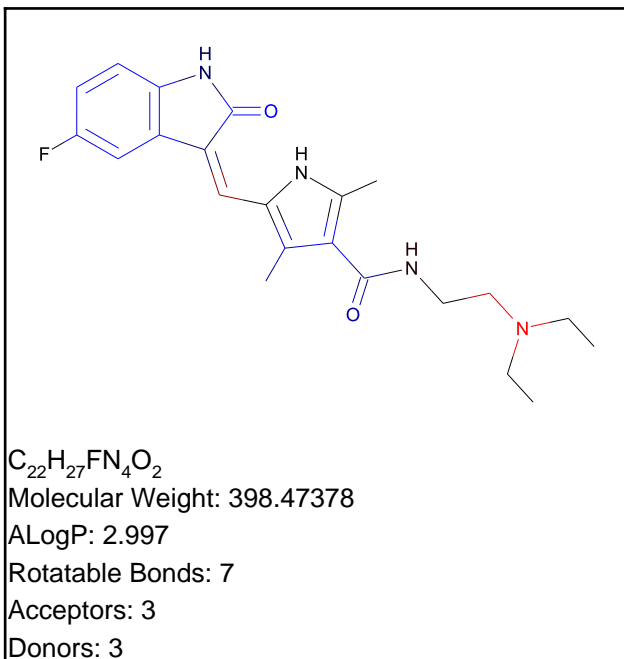

## Model Prediction

Prediction: 33.3

Unit: mg/kg\_body\_weight/day

Mahalanobis Distance: 13.2

Mahalanobis Distance p-value: 5.11e-008

Mahalanobis Distance: The Mahalanobis distance (MD) is a generalization of the Euclidean distance that accounts for correlations among the X properties. It is calculated as the distance to the center of the training data. The larger the MD, the less trustworthy the prediction.

Mahalanobis Distance p-value: The p-value gives the fraction of training data with an MD greater than or equal to the one for the given sample, assuming normally distributed data. The smaller the p-value, the less trustworthy the prediction. For highly non-normal X properties (e.g., fingerprints), the MD p-value is wildly inaccurate.

## Structural Similar Compounds

| Name                        | 455                                                                                 | 4-Chloro-6-(2,3-xylidino)-2-pyridinylthio(N-b-hydroxy-ethyl) acetamide              | 542                                                                                                                  |
|-----------------------------|-------------------------------------------------------------------------------------|-------------------------------------------------------------------------------------|----------------------------------------------------------------------------------------------------------------------|
| Structure                   | 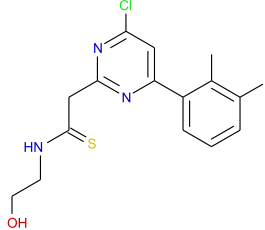 |  | <br><small>AND Enantiomer</small> |
| Actual Endpoint (-log C)    | 3.87681                                                                             | 3.91517                                                                             | 4.79932                                                                                                              |
| Predicted Endpoint (-log C) | 3.77582                                                                             | 3.92186                                                                             | 3.6353                                                                                                               |
| Distance                    | 0.676                                                                               | 0.729                                                                               | 0.751                                                                                                                |
| Reference                   | CPDB                                                                                | CPDB                                                                                | CPDB                                                                                                                 |

## Model Applicability

Unknown features are fingerprint features in the query molecule, but not found or appearing too infrequently in the training set.

1. All properties and OPS components are within expected ranges.
2. Unknown ECFP\_2 feature: -1658273810: [\*]C(=[\*])[c]1:[c]([\*]):[\*]:[\*]:[c]:1[\*]
3. Unknown ECFP\_2 feature: 980271847: [\*][c]1:[\*]:[\*]:[nH]:[c]:1C=[\*]
4. Unknown ECFP\_2 feature: 1791989338: [\*][c]1:[\*]:[\*]:[nH]:[c]:1C
5. Unknown ECFP\_2 feature: 1718013682: [\*]C=C\1/C(=[\*])[\*]:[c]1:[\*]
6. Unknown ECFP\_2 feature: 1182722866: [\*]C(=CC(=[\*])[\*])[\*]

## Feature Contribution

### Top features for positive contribution

| Fingerprint | Bit/Smiles | Feature Structure | Score |
|-------------|------------|-------------------|-------|
|             |            |                   |       |

|        |             |                                                                                                   |       |
|--------|-------------|---------------------------------------------------------------------------------------------------|-------|
| ECFP_6 | -1072294614 | 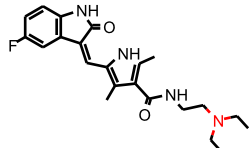<br>[*]N[*][*] | 0.428 |
| ECFP_6 | 1559650422  | <br>[*]C[*]    | 0.203 |
| ECFP_6 | -1925046727 | <br>[*]C=[*]   | 0.145 |

### Top Features for negative contribution

| Fingerprint | Bit/Smiles | Feature Structure                                                                                                       | Score  |
|-------------|------------|-------------------------------------------------------------------------------------------------------------------------|--------|
| ECFP_6      | 2106656448 | 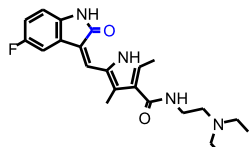<br>[*]C(=O)[*]                    | -0.275 |
| ECFP_6      | 1996767644 | <br>[*][c](:[*]):[cH]:[cH]<br>[:*] | -0.251 |

|        |           |                                                                                                                                           |        |
|--------|-----------|-------------------------------------------------------------------------------------------------------------------------------------------|--------|
| ECFP_6 | 642810091 | 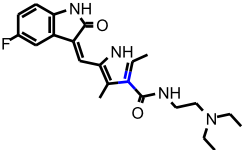 <p data-bbox="1402 305 1541 337">[*][c](-[*]):[*]</p> | -0.247 |
|--------|-----------|-------------------------------------------------------------------------------------------------------------------------------------------|--------|

10a

TOPKAT\_Carcinogenic\_Potency\_TD50\_Rat

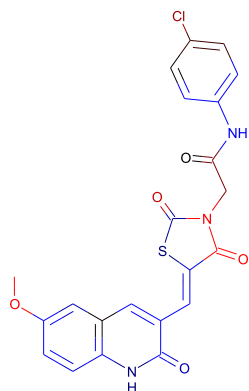
 $C_{22}H_{16}ClN_3O_5S$ 

Molecular Weight: 469.89753

ALogP: 2.815

Rotatable Bonds: 5

Acceptors: 6

Donors: 2

### Model Prediction

Prediction: 15

Unit: mg/kg\_body\_weight/day

Mahalanobis Distance: 15.3

Mahalanobis Distance p-value: 3.43e-012

Mahalanobis Distance: The Mahalanobis distance (MD) is a generalization of the Euclidean distance that accounts for correlations among the X properties. It is calculated as the distance to the center of the training data. The larger the MD, the less trustworthy the prediction.

Mahalanobis Distance p-value: The p-value gives the fraction of training data with an MD greater than or equal to the one for the given sample, assuming normally distributed data. The smaller the p-value, the less trustworthy the prediction. For highly non-normal X properties (e.g., fingerprints), the MD p-value is wildly inaccurate.

### Structural Similar Compounds

| Name                        | Ochratoxin A | 542     | Salicylazosulfapyridine |
|-----------------------------|--------------|---------|-------------------------|
| Structure                   |              |         |                         |
| Actual Endpoint (-log C)    | 6.47264      | 6.59334 | 2.39891                 |
| Predicted Endpoint (-log C) | 5.06501      | 5.06501 | 3.17598                 |
| Distance                    | 0.646        | 0.646   | 0.688                   |
| Reference                   | CPDB         | CPDB    | CPDB                    |

### Model Applicability

Unknown features are fingerprint features in the query molecule, but not found or appearing too infrequently in the training set.

1. OPS PC7 out of range. Value: -5.991. Training min, max, SD, explained variance: -5.0422, 6.1749, 1.868, 0.0335.
2. OPS PC16 out of range. Value: -3.9626. Training min, max, SD, explained variance: -3.6111, 5.345, 1.406, 0.0190.

### Feature Contribution

#### Top features for positive contribution

| Fingerprint | Bit/Smiles | Feature Structure | Score |
|-------------|------------|-------------------|-------|
| FCFP_6      | 136627117  |                   | 0.69  |

|                                               |                   |                                                                                                                                 |              |
|-----------------------------------------------|-------------------|---------------------------------------------------------------------------------------------------------------------------------|--------------|
| FCFP_6                                        | 565998553         | 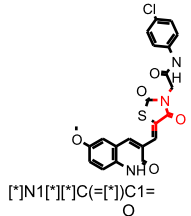<br><chem>[*]N1[*][*]C(=[*])C1=O</chem>      | 0.357        |
| FCFP_6                                        | 1                 | <br><chem>[*]=O</chem>                       | 0.234        |
| <b>Top Features for negative contribution</b> |                   |                                                                                                                                 |              |
| <b>Fingerprint</b>                            | <b>Bit/Smiles</b> | <b>Feature Structure</b>                                                                                                        | <b>Score</b> |
| FCFP_6                                        | 451847724         | <br><chem>[*]C(=CC(=[*]))[*][*]</chem>       | -0.436       |
| FCFP_6                                        | 436886043         | <br><chem>[*]C=C(C(=[*]))C(=[*])[*]</chem> | -0.383       |
| FCFP_6                                        | 16                | <br><chem>[*]:[cH]:[*]</chem>              | -0.354       |



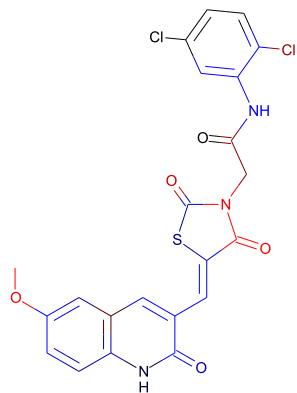
 $C_{22}H_{15}Cl_2N_3O_5S$ 

Molecular Weight: 504.3426

ALogP: 3.479

Rotatable Bonds: 5

Acceptors: 6

Donors: 2

### Model Prediction

Prediction: 13.6

Unit: mg/kg\_body\_weight/day

Mahalanobis Distance: 15.3

Mahalanobis Distance p-value: 3.4e-012

Mahalanobis Distance: The Mahalanobis distance (MD) is a generalization of the Euclidean distance that accounts for correlations among the X properties. It is calculated as the distance to the center of the training data. The larger the MD, the less trustworthy the prediction.

Mahalanobis Distance p-value: The p-value gives the fraction of training data with an MD greater than or equal to the one for the given sample, assuming normally distributed data. The smaller the p-value, the less trustworthy the prediction. For highly non-normal X properties (e.g., fingerprints), the MD p-value is wildly inaccurate.

### Structural Similar Compounds

| Name                        | Ochratoxin A | 542     | C.I. direct brown 95 |
|-----------------------------|--------------|---------|----------------------|
| Structure                   |              |         |                      |
| Actual Endpoint (-log C)    | 6.47264      | 6.59334 | 5.31387              |
| Predicted Endpoint (-log C) | 5.06501      | 5.06501 | 4.30266              |
| Distance                    | 0.666        | 0.666   | 0.717                |
| Reference                   | CPDB         | CPDB    | CPDB                 |

### Model Applicability

Unknown features are fingerprint features in the query molecule, but not found or appearing too infrequently in the training set.

1. OPS PC7 out of range. Value: -6.0165. Training min, max, SD, explained variance: -5.0422, 6.1749, 1.868, 0.0335.
2. OPS PC16 out of range. Value: -3.9832. Training min, max, SD, explained variance: -3.6111, 5.345, 1.406, 0.0190.

### Feature Contribution

#### Top features for positive contribution

| Fingerprint | Bit/Smiles | Feature Structure | Score |
|-------------|------------|-------------------|-------|
| FCFP_6      | 136627117  |                   | 0.69  |

|                                               |                   |                                                                                                                                 |              |
|-----------------------------------------------|-------------------|---------------------------------------------------------------------------------------------------------------------------------|--------------|
| FCFP_6                                        | 565998553         | 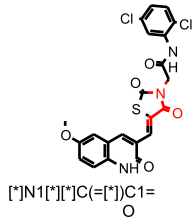<br><chem>[*]N1[*][*]C(=[*])C1=O</chem>      | 0.357        |
| FCFP_6                                        | 1                 | <br><chem>[*]=O</chem>                       | 0.234        |
| <b>Top Features for negative contribution</b> |                   |                                                                                                                                 |              |
| <b>Fingerprint</b>                            | <b>Bit/Smiles</b> | <b>Feature Structure</b>                                                                                                        | <b>Score</b> |
| FCFP_6                                        | 451847724         | <br><chem>[*]C(=CC(=[*]))[*][*]</chem>       | -0.436       |
| FCFP_6                                        | 436886043         | <br><chem>[*]C=C(C(=[*])C(=[*]))[*]</chem> | -0.383       |
| FCFP_6                                        | 16                | <br><chem>[*]:[cH]:[*]</chem>              | -0.354       |





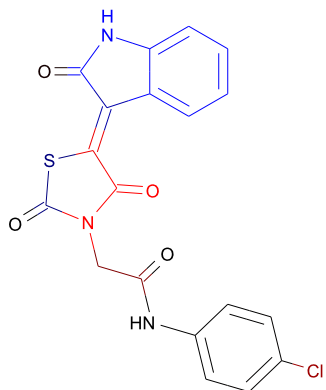

$C_{19}H_{12}ClN_3O_4S$

Molecular Weight: 413.83428

ALogP: 2.363

Rotatable Bonds: 3

Acceptors: 5

Donors: 2

### Model Prediction

Prediction: 14.3

Unit: mg/kg\_body\_weight/day

Mahalanobis Distance: 11.6

Mahalanobis Distance p-value: 0.0028

Mahalanobis Distance: The Mahalanobis distance (MD) is a generalization of the Euclidean distance that accounts for correlations among the X properties. It is calculated as the distance to the center of the training data. The larger the MD, the less trustworthy the prediction.

Mahalanobis Distance p-value: The p-value gives the fraction of training data with an MD greater than or equal to the one for the given sample, assuming normally distributed data. The smaller the p-value, the less trustworthy the prediction. For highly non-normal X properties (e.g., fingerprints), the MD p-value is wildly inaccurate.

### Structural Similar Compounds

| Name                        | Ochratoxin A | 542     | 1,2-Dihydro-2-(5-nitro-2-thi-enyl) quinazolin-4(3H)-one |
|-----------------------------|--------------|---------|---------------------------------------------------------|
| Structure                   |              |         |                                                         |
| Actual Endpoint (-log C)    | 6.47264      | 6.59334 | 5.25509                                                 |
| Predicted Endpoint (-log C) | 5.06501      | 5.06501 | 3.89291                                                 |
| Distance                    | 0.628        | 0.628   | 0.651                                                   |
| Reference                   | CPDB         | CPDB    | CPDB                                                    |

### Model Applicability

Unknown features are fingerprint features in the query molecule, but not found or appearing too infrequently in the training set.

- All properties and OPS components are within expected ranges.

### Feature Contribution

| Top features for positive contribution |            |                                    |       |
|----------------------------------------|------------|------------------------------------|-------|
| Fingerprint                            | Bit/Smiles | Feature Structure                  | Score |
| FCFP_6                                 | 565998553  | <br><chem>[*]N1[*]C(=O)C1=O</chem> | 0.357 |

|                                               |                   |                                                                                                                              |              |
|-----------------------------------------------|-------------------|------------------------------------------------------------------------------------------------------------------------------|--------------|
| FCFP_6                                        | 1                 | 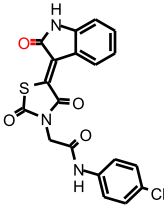<br>[*]=O                                 | 0.234        |
| FCFP_6                                        | 32                | <br>[*]Cl                                 | 0.154        |
| <b>Top Features for negative contribution</b> |                   |                                                                                                                              |              |
| <b>Fingerprint</b>                            | <b>Bit/Smiles</b> | <b>Feature Structure</b>                                                                                                     | <b>Score</b> |
| FCFP_6                                        | 991735244         | <br>[*][c]1:[*]:[cH]:[cH]<br>:[cH]:[cH]:1 | -0.422       |
| FCFP_6                                        | 16                | <br>[*]:[cH]:[*]                        | -0.354       |
| FCFP_6                                        | 590925877         | <br>[*]N[c](:[cH]:[*]):[c<br>H]:[*]     | -0.323       |



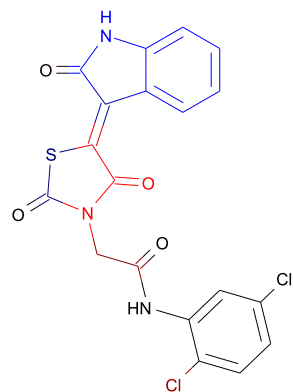
 $C_{19}H_{11}Cl_2N_3O_4S$ 

Molecular Weight: 448.27933

ALogP: 3.028

Rotatable Bonds: 3

Acceptors: 5

Donors: 2

### Model Prediction

Prediction: 13

Unit: mg/kg\_body\_weight/day

Mahalanobis Distance: 11.5

Mahalanobis Distance p-value: 0.00327

Mahalanobis Distance: The Mahalanobis distance (MD) is a generalization of the Euclidean distance that accounts for correlations among the X properties. It is calculated as the distance to the center of the training data. The larger the MD, the less trustworthy the prediction.

Mahalanobis Distance p-value: The p-value gives the fraction of training data with an MD greater than or equal to the one for the given sample, assuming normally distributed data. The smaller the p-value, the less trustworthy the prediction. For highly non-normal X properties (e.g., fingerprints), the MD p-value is wildly inaccurate.

### Structural Similar Compounds

| Name                        | Ochratoxin A | 542     | 1,2-Dihydro-2-(5-nitro-2-thienyl)quinazolin-4(3H)-one |
|-----------------------------|--------------|---------|-------------------------------------------------------|
| Structure                   |              |         |                                                       |
| Actual Endpoint (-log C)    | 6.47264      | 6.59334 | 5.25509                                               |
| Predicted Endpoint (-log C) | 5.06501      | 5.06501 | 3.89291                                               |
| Distance                    | 0.628        | 0.628   | 0.688                                                 |
| Reference                   | CPDB         | CPDB    | CPDB                                                  |

### Model Applicability

Unknown features are fingerprint features in the query molecule, but not found or appearing too infrequently in the training set.

- All properties and OPS components are within expected ranges.

### Feature Contribution

#### Top features for positive contribution

| Fingerprint | Bit/Smiles | Feature Structure                     | Score |
|-------------|------------|---------------------------------------|-------|
| FCFP_6      | 565998553  | <br><chem>[*]N1[*][*]C(=O)C1=O</chem> | 0.357 |

|                                               |                   |                                                                                                                              |              |
|-----------------------------------------------|-------------------|------------------------------------------------------------------------------------------------------------------------------|--------------|
| FCFP_6                                        | 1                 | 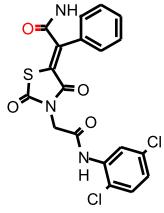<br>[*]=O                                 | 0.234        |
| FCFP_6                                        | 32                | <br>[*]Cl                                 | 0.154        |
| <b>Top Features for negative contribution</b> |                   |                                                                                                                              |              |
| <b>Fingerprint</b>                            | <b>Bit/Smiles</b> | <b>Feature Structure</b>                                                                                                     | <b>Score</b> |
| FCFP_6                                        | 991735244         | <br>[*][c]1:[*]:[cH]:[cH]<br>:[cH]:[cH]:1 | -0.422       |
| FCFP_6                                        | 16                | <br>[*]:[cH]:[*]                         | -0.354       |
| FCFP_6                                        | 590925877         | <br>[*]N[c](:[cH]:[*]):[cH]:[*]         | -0.323       |



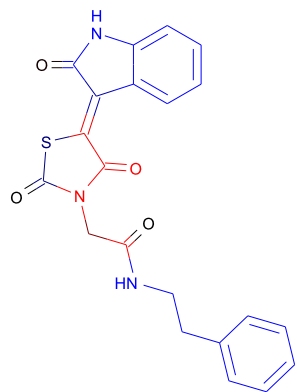

$C_{21}H_{17}N_3O_4S$

Molecular Weight: 407.44237

ALogP: 2.027

Rotatable Bonds: 5

Acceptors: 5

Donors: 2

### Model Prediction

Prediction: 121

Unit: mg/kg\_body\_weight/day

Mahalanobis Distance: 13

Mahalanobis Distance p-value: 5.66e-006

Mahalanobis Distance: The Mahalanobis distance (MD) is a generalization of the Euclidean distance that accounts for correlations among the X properties. It is calculated as the distance to the center of the training data. The larger the MD, the less trustworthy the prediction.

Mahalanobis Distance p-value: The p-value gives the fraction of training data with an MD greater than or equal to the one for the given sample, assuming normally distributed data. The smaller the p-value, the less trustworthy the prediction. For highly non-normal X properties (e.g., fingerprints), the MD p-value is wildly inaccurate.

### Structural Similar Compounds

| Name                        | Ochratoxin A | 542     | 4,4'-Sulfonylbisacetanilide |
|-----------------------------|--------------|---------|-----------------------------|
| Structure                   |              |         |                             |
| Actual Endpoint (-log C)    | 6.47264      | 6.59334 | 3.77655                     |
| Predicted Endpoint (-log C) | 5.06501      | 5.06501 | 3.55337                     |
| Distance                    | 0.608        | 0.608   | 0.669                       |
| Reference                   | CPDB         | CPDB    | CPDB                        |

### Model Applicability

Unknown features are fingerprint features in the query molecule, but not found or appearing too infrequently in the training set.

1. All properties and OPS components are within expected ranges.

### Feature Contribution

#### Top features for positive contribution

| Fingerprint | Bit/Smiles | Feature Structure                  | Score |
|-------------|------------|------------------------------------|-------|
| FCFP_6      | 565998553  | <br><chem>[*]N1[*]C(=O)C1=O</chem> | 0.357 |



|                                               |                   |                                                                                                                                 |              |
|-----------------------------------------------|-------------------|---------------------------------------------------------------------------------------------------------------------------------|--------------|
| FCFP_6                                        | 1                 | 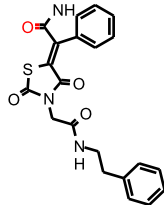<br>[*]=O                                    | 0.234        |
| FCFP_6                                        | -885550502        | <br>[*]CNC(=[*])[*]                          | 0.229        |
| <b>Top Features for negative contribution</b> |                   |                                                                                                                                 |              |
| <b>Fingerprint</b>                            | <b>Bit/Smiles</b> | <b>Feature Structure</b>                                                                                                        | <b>Score</b> |
| FCFP_6                                        | -1272709286       | <br>[*]CCN[*]                                | -0.526       |
| FCFP_6                                        | 991735244         | <br>[*][c]1:[*]:[cH]:[cH]<br>:[cH]:[cH]:1  | -0.422       |
| FCFP_6                                        | -2093839777       | <br>[*][c]1:[cH]:[cH]:[cH]<br>:[cH]:[cH]:1 | -0.378       |



# Sorafenib

# TOPKAT\_Carcinogenic\_Potency\_TD50\_Rat

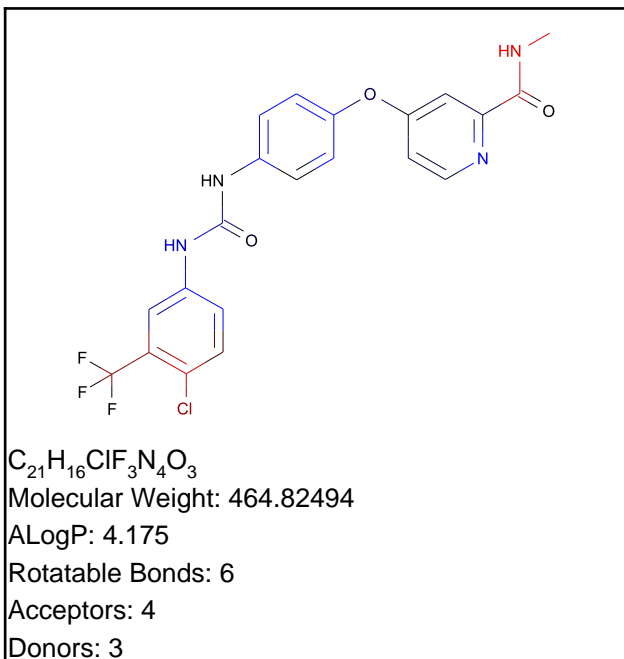

## Model Prediction

Prediction: 14.2

Unit: mg/kg\_body\_weight/day

Mahalanobis Distance: 20.4

Mahalanobis Distance p-value: 9.56e-031

Mahalanobis Distance: The Mahalanobis distance (MD) is a generalization of the Euclidean distance that accounts for correlations among the X properties. It is calculated as the distance to the center of the training data. The larger the MD, the less trustworthy the prediction.

Mahalanobis Distance p-value: The p-value gives the fraction of training data with an MD greater than or equal to the one for the given sample, assuming normally distributed data. The smaller the p-value, the less trustworthy the prediction. For highly non-normal X properties (e.g., fingerprints), the MD p-value is wildly inaccurate.

## Structural Similar Compounds

| Name                        | Fluvastatin                                                                         | 913                                                                                 | Ochratoxin A                                                                        |
|-----------------------------|-------------------------------------------------------------------------------------|-------------------------------------------------------------------------------------|-------------------------------------------------------------------------------------|
| Structure                   | 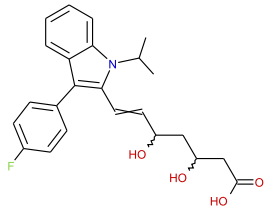 |  |  |
| Actual Endpoint (-log C)    | 3.51742                                                                             | 3.51742                                                                             | 6.47264                                                                             |
| Predicted Endpoint (-log C) | 5.41573                                                                             | 5.41573                                                                             | 5.06501                                                                             |
| Distance                    | 0.597                                                                               | 0.597                                                                               | 0.666                                                                               |
| Reference                   | CPDB                                                                                | CPDB                                                                                | CPDB                                                                                |

## Model Applicability

Unknown features are fingerprint features in the query molecule, but not found or appearing too infrequently in the training set.

- All properties and OPS components are within expected ranges.
- Unknown FCFP\_2 feature: -1029533685: [\*]:[c](:[\*])C(F)(F)F

## Feature Contribution

### Top features for positive contribution

| Fingerprint | Bit/Smiles | Feature Structure                                                                              | Score |
|-------------|------------|------------------------------------------------------------------------------------------------|-------|
| FCFP_6      | 1          | 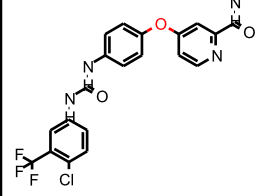<br>[*]=O | 0.234 |

|                                               |                   |                                                                                                                                 |              |
|-----------------------------------------------|-------------------|---------------------------------------------------------------------------------------------------------------------------------|--------------|
| FCFP_6                                        | -885550502        | 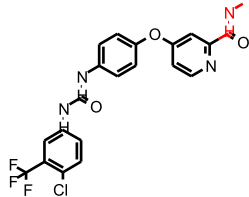<br>[*]CNC(=[*])[*]                          | 0.229        |
| FCFP_6                                        | 32                | <br>[*]Cl                                    | 0.154        |
| <b>Top Features for negative contribution</b> |                   |                                                                                                                                 |              |
| <b>Fingerprint</b>                            | <b>Bit/Smiles</b> | <b>Feature Structure</b>                                                                                                        | <b>Score</b> |
| FCFP_6                                        | 16                | <br>[*]:[cH]:[*]                             | -0.354       |
| FCFP_6                                        | 590925877         | <br>[*]N[c](:[cH]:[*]):[cH]:[*]            | -0.323       |
| FCFP_6                                        | 1674451008        | <br>[*]O[c]1:[cH]:[*]:[c]([*]):[cH]:[cH]:1 | -0.233       |



# Sunitinib

# TOPKAT\_Carcinogenic\_Potency\_TD50\_Rat

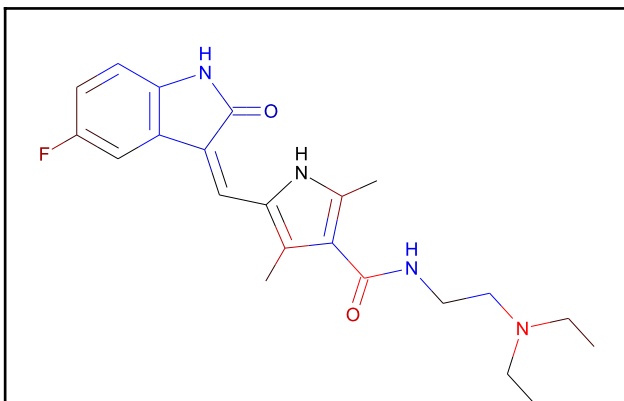

$C_{22}H_{27}FN_4O_2$   
 Molecular Weight: 398.47378  
 ALogP: 2.997  
 Rotatable Bonds: 7  
 Acceptors: 3  
 Donors: 3

## Model Prediction

Prediction: 4.13  
 Unit: mg/kg\_body\_weight/day  
 Mahalanobis Distance: 14  
 Mahalanobis Distance p-value: 2.69e-008

Mahalanobis Distance: The Mahalanobis distance (MD) is a generalization of the Euclidean distance that accounts for correlations among the X properties. It is calculated as the distance to the center of the training data. The larger the MD, the less trustworthy the prediction.

Mahalanobis Distance p-value: The p-value gives the fraction of training data with an MD greater than or equal to the one for the given sample, assuming normally distributed data. The smaller the p-value, the less trustworthy the prediction. For highly non-normal X properties (e.g., fingerprints), the MD p-value is wildly inaccurate.

## Structural Similar Compounds

| Name                        | 913                                                                                 | Fluvastatin                                                                         | 542                                                                                 |
|-----------------------------|-------------------------------------------------------------------------------------|-------------------------------------------------------------------------------------|-------------------------------------------------------------------------------------|
| Structure                   | 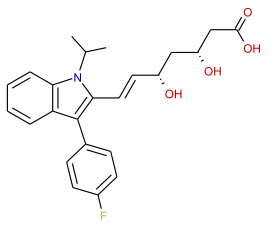 |  |  |
| Actual Endpoint (-log C)    | 3.51742                                                                             | 3.51742                                                                             | 6.59334                                                                             |
| Predicted Endpoint (-log C) | 5.41573                                                                             | 5.41573                                                                             | 5.06501                                                                             |
| Distance                    | 0.636                                                                               | 0.636                                                                               | 0.671                                                                               |
| Reference                   | CPDB                                                                                | CPDB                                                                                | CPDB                                                                                |

## Model Applicability

Unknown features are fingerprint features in the query molecule, but not found or appearing too infrequently in the training set.

- OPS PC18 out of range. Value: 6.1602. Training min, max, SD, explained variance: -4.1023, 4.8669, 1.305, 0.0164.

## Feature Contribution

### Top features for positive contribution

| Fingerprint | Bit/Smiles | Feature Structure                                                                                                  | Score |
|-------------|------------|--------------------------------------------------------------------------------------------------------------------|-------|
| FCFP_6      | 9          | 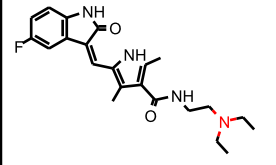<br><chem>[*]N([*])[*]</chem> | 0.385 |

|                                               |                   |                                                                                                                      |              |
|-----------------------------------------------|-------------------|----------------------------------------------------------------------------------------------------------------------|--------------|
| FCFP_6                                        | -587569116        | 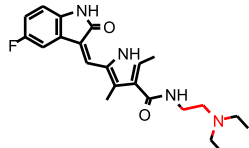<br>[*]CCN[*]                     | 0.319        |
| FCFP_6                                        | 1                 | <br>[*]=O                         | 0.234        |
| <b>Top Features for negative contribution</b> |                   |                                                                                                                      |              |
| <b>Fingerprint</b>                            | <b>Bit/Smiles</b> | <b>Feature Structure</b>                                                                                             | <b>Score</b> |
| FCFP_6                                        | -1272709286       | <br>[*]CCN[*]                     | -0.526       |
| FCFP_6                                        | 16                | <br>[*]:[cH]:[*]                | -0.354       |
| FCFP_6                                        | 590925877         | <br>[*]N[c](:[cH]:[*]):[cH]:[*] | -0.323       |





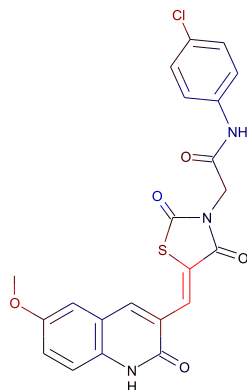

$C_{22}H_{16}ClN_3O_5S$

Molecular Weight: 469.89753

ALogP: 2.815

Rotatable Bonds: 5

Acceptors: 6

Donors: 2

### Model Prediction

Prediction: 0.00186

Unit: g/kg\_body\_weight

Mahalanobis Distance: 32.5

Mahalanobis Distance p-value: 3.17e-029

Mahalanobis Distance: The Mahalanobis distance (MD) is a generalization of the Euclidean distance that accounts for correlations among the X properties. It is calculated as the distance to the center of the training data. The larger the MD, the less trustworthy the prediction.

Mahalanobis Distance p-value: The p-value gives the fraction of training data with an MD greater than or equal to the one for the given sample, assuming normally distributed data. The smaller the p-value, the less trustworthy the prediction. For highly non-normal X properties (e.g., fingerprints), the MD p-value is wildly inaccurate.

### Structural Similar Compounds

| Name                        | GLIPIZIDE | GLYBURIDE | CHLORSULFURON                   |
|-----------------------------|-----------|-----------|---------------------------------|
| Structure                   |           |           |                                 |
| Actual Endpoint (-log C)    | 3.94991   | 4.21661   | 4.15566                         |
| Predicted Endpoint (-log C) | 3.95594   | 4.21035   | 3.79771                         |
| Distance                    | 0.604     | 0.613     | 0.643                           |
| Reference                   | NDA-17583 | UPJ-26452 | EPA COVER SHEET 0027;880301;(1) |

### Model Applicability

Unknown features are fingerprint features in the query molecule, but not found or appearing too infrequently in the training set.

1. OPS PC22 out of range. Value: -6.8151. Training min, max, SD, explained variance: -4.3287, 5.3383, 1.588, 0.0110.
2. Unknown ECFP\_6 feature: -154530762: [\*]N[\*]
3. Unknown ECFP\_6 feature: 912478223: [\*]S[\*]
4. Unknown ECFP\_6 feature: 99947387: [\*]:[c](:[\*])Cl
5. Unknown ECFP\_6 feature: -176494269: [\*]:[cH]:[c](Cl):[cH]:[\*]
6. Unknown ECFP\_6 feature: -177077903: [\*]N[c](:[cH]:[\*]):[cH]:[\*]
7. Unknown ECFP\_6 feature: 1335833675: [\*]N[c](:[cH]:[\*]):[c]([\*]):[\*]
8. Unknown ECFP\_6 feature: 1336666212: [\*][c](:[\*]):[c](C=[\*]):[cH]:[\*]
9. Unknown ECFP\_6 feature: 464808839: [\*]C(=C[c](:[\*]):[\*])[\*]
10. Unknown ECFP\_6 feature: 2131425032: [\*]\C=C(\C=[\*])/C(=[\*])[\*]
11. Unknown ECFP\_6 feature: 1298725959: [\*]NC(=O)C(=[\*])[\*]
12. Unknown ECFP\_6 feature: -1699286547: [\*]C(=[\*])N[c](:[\*]):[\*]
13. Unknown ECFP\_6 feature: 1182722866: [\*]C(=CC(=[\*])[\*])[\*]
14. Unknown ECFP\_6 feature: 1000552169: [\*]\C=C\1/S[\*][\*]C1=[\*]
15. Unknown ECFP\_6 feature: 1945129186: [\*]N1[\*][\*]C(=[\*])C1=O
16. Unknown ECFP\_6 feature: -661097313: [\*]CN1C(=[\*])[\*][\*]C1=[\*]
17. Unknown ECFP\_6 feature: 190445529: [\*]N1[\*][\*]SC1=O
18. Unknown ECFP\_6 feature: 2122741631: [\*]=C1[\*][\*]C(=[\*])S1

19. Unknown ECFP\_6 feature: -37698365: [\*]N[\*]CC(=[\*])[\*]
20. Unknown ECFP\_6 feature: 1731843802: [\*]CC(=O)N[\*]
21. Unknown ECFP\_6 feature: 1307307440: [\*]:[c](:[\*])OC

## Feature Contribution

### Top features for positive contribution

| Fingerprint | Bit/Smiles  | Feature Structure                                                                                                         | Score |
|-------------|-------------|---------------------------------------------------------------------------------------------------------------------------|-------|
| FCFP_6      | 451847724   | 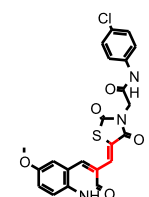<br><chem>[*]C(=CC(=[*])[*])[*]</chem> | 0.16  |
| FCFP_6      | -1143715940 | <br><chem>[*]=C1[*][*]C(=[*])S1</chem> | 0.13  |
| ECFP_6      | 1559650422  | <br><chem>[*]C[*]</chem>              | 0.129 |

### Top Features for negative contribution

| Fingerprint | Bit/Smiles | Feature Structure | Score |
|-------------|------------|-------------------|-------|
|             |            |                   |       |

|        |             |                                                                                                                                                     |         |
|--------|-------------|-----------------------------------------------------------------------------------------------------------------------------------------------------|---------|
| ECFP_6 | 2106656448  | 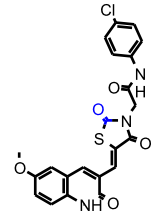 <p data-bbox="1428 324 1585 357">[*]C(=O)[*]</p>                | -0.11   |
| FCFP_6 | 1           |  <p data-bbox="1428 597 1585 630">[*]=O</p>                      | -0.102  |
| ECFP_6 | -1236483485 |  <p data-bbox="1428 865 1585 898">[*]C(=O)N(c[*])[*]<br/>[*]</p> | -0.0747 |

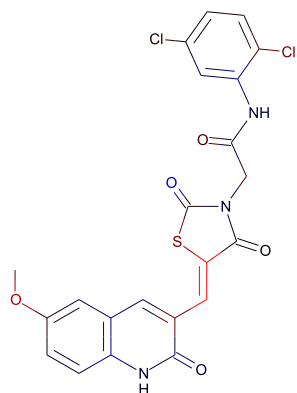

$C_{22}H_{15}Cl_2N_3O_5S$

Molecular Weight: 504.3426

ALogP: 3.479

Rotatable Bonds: 5

Acceptors: 6

Donors: 2

### Model Prediction

Prediction: 0.00163

Unit: g/kg\_body\_weight

Mahalanobis Distance: 32.6

Mahalanobis Distance p-value: 2.73e-029

Mahalanobis Distance: The Mahalanobis distance (MD) is a generalization of the Euclidean distance that accounts for correlations among the X properties. It is calculated as the distance to the center of the training data. The larger the MD, the less trustworthy the prediction.

Mahalanobis Distance p-value: The p-value gives the fraction of training data with an MD greater than or equal to the one for the given sample, assuming normally distributed data. The smaller the p-value, the less trustworthy the prediction. For highly non-normal X properties (e.g., fingerprints), the MD p-value is wildly inaccurate.

### Structural Similar Compounds

| Name                        | GLYBURIDE | GLIPIZIDE | CHLORSULFURON                   |
|-----------------------------|-----------|-----------|---------------------------------|
| Structure                   |           |           |                                 |
| Actual Endpoint (-log C)    | 4.21661   | 3.94991   | 4.15566                         |
| Predicted Endpoint (-log C) | 4.21035   | 3.95594   | 3.79771                         |
| Distance                    | 0.591     | 0.646     | 0.703                           |
| Reference                   | UPJ-26452 | NDA-17583 | EPA COVER SHEET 0027;880301;(1) |

### Model Applicability

Unknown features are fingerprint features in the query molecule, but not found or appearing too infrequently in the training set.

1. OPS PC22 out of range. Value: -6.8257. Training min, max, SD, explained variance: -4.3287, 5.3383, 1.588, 0.0110.
2. Unknown ECFP\_6 feature: -154530762: [\*]N[\*]
3. Unknown ECFP\_6 feature: 912478223: [\*]S[\*]
4. Unknown ECFP\_6 feature: 99947387: [\*]:[c](:[\*])Cl
5. Unknown ECFP\_6 feature: -176494269: [\*]:[cH]:[c](Cl):[cH]:[\*]
6. Unknown ECFP\_6 feature: 1335108269: [\*]N[c](:[cH]:[\*]):[c]([\*]):[\*]
7. Unknown ECFP\_6 feature: 1335833675: [\*]N[c](:[cH]:[\*]):[c]([\*]):[\*]
8. Unknown ECFP\_6 feature: 1336666212: [\*][c](:[\*]):[c](C=[\*]):[cH]:[\*]
9. Unknown ECFP\_6 feature: 464808839: [\*]C(=C[c](:[\*]):[\*])[\*]
10. Unknown ECFP\_6 feature: 2131425032: [\*]\C=C(\C=[\*])/C(=[\*])[\*]
11. Unknown ECFP\_6 feature: 1298725959: [\*]NC(=O)C(=[\*])[\*]
12. Unknown ECFP\_6 feature: -1699286547: [\*]C(=[\*])N[c](:[\*]):[\*]
13. Unknown ECFP\_6 feature: 1182722866: [\*]C(=CC(=[\*])[\*])[\*]
14. Unknown ECFP\_6 feature: 1000552169: [\*]\C=C\1/S[\*][\*]C1=[\*]
15. Unknown ECFP\_6 feature: 1945129186: [\*]N1[\*][\*]C(=[\*])C1=O
16. Unknown ECFP\_6 feature: -661097313: [\*]CN1C(=[\*])[\*][\*]C1=[\*]
17. Unknown ECFP\_6 feature: 190445529: [\*]N1[\*][\*]SC1=O
18. Unknown ECFP\_6 feature: 2122741631: [\*]=C1[\*][\*]C(=[\*])S1

19. Unknown ECFP\_6 feature: -37698365: [\*]N[\*]CC(=[\*])[\*]
20. Unknown ECFP\_6 feature: 1731843802: [\*]CC(=O)N[\*]
21. Unknown ECFP\_6 feature: 1307307440: [\*]:[c](:[\*])OC

## Feature Contribution

### Top features for positive contribution

| Fingerprint | Bit/Smiles  | Feature Structure                                                                                                         | Score |
|-------------|-------------|---------------------------------------------------------------------------------------------------------------------------|-------|
| FCFP_6      | 451847724   | 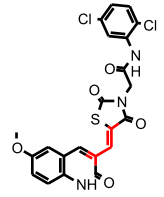<br><chem>[*]C(=CC(=[*])[*])[*]</chem> | 0.16  |
| FCFP_6      | -1143715940 | <br><chem>[*]=C1[*][*]C(=[*])S1</chem> | 0.13  |
| ECFP_6      | 1559650422  | <br><chem>[*]C[*]</chem>              | 0.129 |

### Top Features for negative contribution

| Fingerprint | Bit/Smiles | Feature Structure | Score |
|-------------|------------|-------------------|-------|
|             |            |                   |       |

|        |             |                                                                                                                     |         |
|--------|-------------|---------------------------------------------------------------------------------------------------------------------|---------|
| ECFP_6 | 2106656448  | 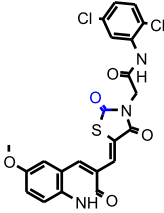<br>[*]C(=O)[*]                  | -0.11   |
| FCFP_6 | 1           | <br>[*]=O                        | -0.102  |
| ECFP_6 | -1236483485 | <br>[*]C(=[*])N[c](-[*]):<br>[*] | -0.0747 |

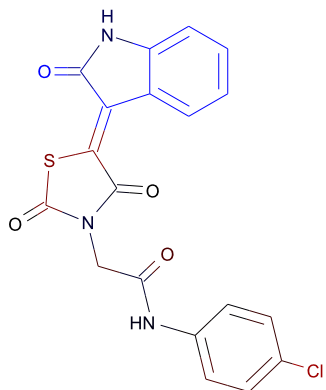

$C_{19}H_{12}ClN_3O_4S$

Molecular Weight: 413.83428

ALogP: 2.363

Rotatable Bonds: 3

Acceptors: 5

Donors: 2

### Model Prediction

Prediction: 0.0298

Unit: g/kg\_body\_weight

Mahalanobis Distance: 30.1

Mahalanobis Distance p-value: 8.84e-025

Mahalanobis Distance: The Mahalanobis distance (MD) is a generalization of the Euclidean distance that accounts for correlations among the X properties. It is calculated as the distance to the center of the training data. The larger the MD, the less trustworthy the prediction.

Mahalanobis Distance p-value: The p-value gives the fraction of training data with an MD greater than or equal to the one for the given sample, assuming normally distributed data. The smaller the p-value, the less trustworthy the prediction. For highly non-normal X properties (e.g., fingerprints), the MD p-value is wildly inaccurate.

### Structural Similar Compounds

| Name                        | CHLORSULFURON                   | PIROXICAM | DANTROLENE.NA |
|-----------------------------|---------------------------------|-----------|---------------|
| Structure                   |                                 |           |               |
| Actual Endpoint (-log C)    | 4.15566                         | 5.52028   | 4.19625       |
| Predicted Endpoint (-log C) | 3.79771                         | 4.06087   | 4.62637       |
| Distance                    | 0.587                           | 0.596     | 0.600         |
| Reference                   | EPA COVER SHEET 0027;880301;(1) | NDA-18147 | NDA-17443     |

### Model Applicability

Unknown features are fingerprint features in the query molecule, but not found or appearing too infrequently in the training set.

1. OPS PC22 out of range. Value: -4.9837. Training min, max, SD, explained variance: -4.3287, 5.3383, 1.588, 0.0110.
2. Unknown ECFP\_6 feature: -154530762: [\*]N[\*]
3. Unknown ECFP\_6 feature: 912478223: [\*]S[\*]
4. Unknown ECFP\_6 feature: 1997021792: [\*]:[cH]:[cH]:[cH]:[\*]
5. Unknown ECFP\_6 feature: 1335833675: [\*]N[c](:[cH]:[\*]):[c]([\*]):[\*]
6. Unknown ECFP\_6 feature: -1699286547: [\*]C(=[\*])N[c](:[\*]):[\*]
7. Unknown ECFP\_6 feature: 1298725959: [\*]NC(=O)C(=[\*])[\*]
8. Unknown ECFP\_6 feature: 1790105651: [\*]C(=C1C(=[\*])[\*]:[c]1:[\*])[\*]
9. Unknown ECFP\_6 feature: -631778390: [\*]C(=C1S[\*][\*]C1=[\*])[\*]
10. Unknown ECFP\_6 feature: 2122741631: [\*]=C1[\*][\*]C(=[\*])S1
11. Unknown ECFP\_6 feature: 190445529: [\*]N1[\*][\*]SC1=O
12. Unknown ECFP\_6 feature: -661097313: [\*]CN1C(=[\*])[\*][\*]C1=[\*]
13. Unknown ECFP\_6 feature: 1945129186: [\*]N1[\*][\*]C(=[\*])C1=O
14. Unknown ECFP\_6 feature: -37698365: [\*]N([\*])CC(=[\*])[\*]
15. Unknown ECFP\_6 feature: 1731843802: [\*]CC(=O)N[\*]
16. Unknown ECFP\_6 feature: -177077903: [\*]N[c](:[cH]:[\*]):[cH]:[\*]
17. Unknown ECFP\_6 feature: -176494269: [\*]:[cH]:[c](Cl):[cH]:[\*]
18. Unknown ECFP\_6 feature: 99947387: [\*]:[c](:[\*])Cl

## Feature Contribution

| Top features for positive contribution |             |                                                                                                                                         |        |
|----------------------------------------|-------------|-----------------------------------------------------------------------------------------------------------------------------------------|--------|
| Fingerprint                            | Bit/Smiles  | Feature Structure                                                                                                                       | Score  |
| FCFP_6                                 | -1143715940 | 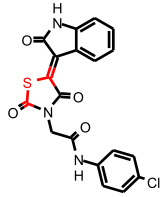<br><chem>[*]=C1[*][*]C(=[*])S1</chem>               | 0.13   |
| ECFP_6                                 | 1559650422  | <br><chem>[*]C[*]</chem>                             | 0.129  |
| FCFP_6                                 | 32          | <br><chem>[*]Cl</chem>                               | 0.101  |
| Top Features for negative contribution |             |                                                                                                                                         |        |
| Fingerprint                            | Bit/Smiles  | Feature Structure                                                                                                                       | Score  |
| FCFP_6                                 | 991735244   | <br><chem>[*][c]1:[*]:[cH]:[cH]:[cH]:[cH]:1</chem> | -0.134 |



|        |            |                                                                                                                                                                 |        |
|--------|------------|-----------------------------------------------------------------------------------------------------------------------------------------------------------------|--------|
| ECFP_6 | 1564392544 | 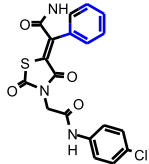 <p data-bbox="1381 284 1577 342">[*][c]1:[*]:[cH]:[cH]<br/>:[cH]:[cH]:1</p> | -0.133 |
| ECFP_6 | 2106656448 |  <p data-bbox="1430 589 1556 621">[*]C(=O)[*]</p>                            | -0.11  |

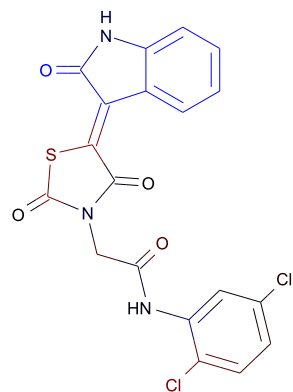

$C_{19}H_{11}Cl_2N_3O_4S$

Molecular Weight: 448.27933

ALogP: 3.028

Rotatable Bonds: 3

Acceptors: 5

Donors: 2

### Model Prediction

Prediction: 0.0284

Unit: g/kg\_body\_weight

Mahalanobis Distance: 30.1

Mahalanobis Distance p-value: 7.98e-025

Mahalanobis Distance: The Mahalanobis distance (MD) is a generalization of the Euclidean distance that accounts for correlations among the X properties. It is calculated as the distance to the center of the training data. The larger the MD, the less trustworthy the prediction.

Mahalanobis Distance p-value: The p-value gives the fraction of training data with an MD greater than or equal to the one for the given sample, assuming normally distributed data. The smaller the p-value, the less trustworthy the prediction. For highly non-normal X properties (e.g., fingerprints), the MD p-value is wildly inaccurate.

### Structural Similar Compounds

| Name                        | CHLORSULFURON                   | DANTROLENE.NA | PIROXICAM |
|-----------------------------|---------------------------------|---------------|-----------|
| Structure                   |                                 |               |           |
| Actual Endpoint (-log C)    | 4.15566                         | 4.19625       | 5.52028   |
| Predicted Endpoint (-log C) | 3.79771                         | 4.62637       | 4.06087   |
| Distance                    | 0.634                           | 0.656         | 0.668     |
| Reference                   | EPA COVER SHEET 0027;880301;(1) | NDA-17443     | NDA-18147 |

### Model Applicability

Unknown features are fingerprint features in the query molecule, but not found or appearing too infrequently in the training set.

1. OPS PC22 out of range. Value: -4.9943. Training min, max, SD, explained variance: -4.3287, 5.3383, 1.588, 0.0110.
2. Unknown ECFP\_6 feature: -154530762: [\*]N[\*]
3. Unknown ECFP\_6 feature: 912478223: [\*]S[\*]
4. Unknown ECFP\_6 feature: 1997021792: [\*]:[cH]:[cH]:[cH]:[\*]
5. Unknown ECFP\_6 feature: 1335833675: [\*]N[c](:[cH]:[\*]):[c]([\*]):[\*]
6. Unknown ECFP\_6 feature: -1699286547: [\*]C(=[\*])N[c](:[\*]):[\*]
7. Unknown ECFP\_6 feature: 1298725959: [\*]NC(=O)C(=[\*])[\*]
8. Unknown ECFP\_6 feature: 1790105651: [\*]C(=C1C(=[\*])[\*]:[c]1:[\*])[\*]
9. Unknown ECFP\_6 feature: -631778390: [\*]C(=C1S[\*][\*]C1=[\*])[\*]
10. Unknown ECFP\_6 feature: 2122741631: [\*]=C1[\*][\*]C(=[\*])S1
11. Unknown ECFP\_6 feature: 190445529: [\*]N1[\*][\*]SC1=O
12. Unknown ECFP\_6 feature: -661097313: [\*]CN1C(=[\*])[\*][\*]C1=[\*]
13. Unknown ECFP\_6 feature: 1945129186: [\*]N1[\*][\*]C(=[\*])C1=O
14. Unknown ECFP\_6 feature: -37698365: [\*]N([\*])CC(=[\*])[\*]
15. Unknown ECFP\_6 feature: 1731843802: [\*]CC(=O)N[\*]
16. Unknown ECFP\_6 feature: 1335108269: [\*]N[c](:[cH]:[\*]):[c]([\*]):[\*]
17. Unknown ECFP\_6 feature: -176494269: [\*]:[cH]:[c](Cl):[cH]:[\*]
18. Unknown ECFP\_6 feature: 99947387: [\*]:[c](:[\*])Cl

## Feature Contribution

| Top features for positive contribution |            |                                                                                                                                              |        |
|----------------------------------------|------------|----------------------------------------------------------------------------------------------------------------------------------------------|--------|
| Fingerprint                            | Bit/Smiles | Feature Structure                                                                                                                            | Score  |
| FCFP_6                                 | 1143715940 | 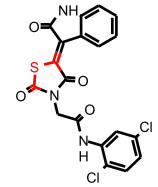<br><chem>[*]=C1[*][*]C(=[*])S1</chem>                    | 0.13   |
| ECFP_6                                 | 1559650422 | <br><chem>[*]C[*]</chem>                                  | 0.129  |
| FCFP_6                                 | 32         | <br><chem>[*]Cl</chem>                                    | 0.101  |
| Top Features for negative contribution |            |                                                                                                                                              |        |
| Fingerprint                            | Bit/Smiles | Feature Structure                                                                                                                            | Score  |
| FCFP_6                                 | 991735244  | <br><chem>[*][c]1:[*]:[cH]:[cH]:[cH]:[cH]:[cH]:1</chem> | -0.134 |

|        |            |                                                                                                                                                            |        |
|--------|------------|------------------------------------------------------------------------------------------------------------------------------------------------------------|--------|
| ECFP_6 | 1564392544 | 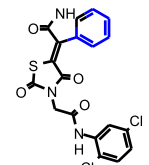 <p data-bbox="1386 284 1575 341">[*][c]1:[*]:[cH]:[cH]:[cH]:[cH]:1</p> | -0.133 |
| ECFP_6 | 2106656448 |  <p data-bbox="1428 584 1554 617">[*]C(=O)[*]</p>                       | -0.11  |

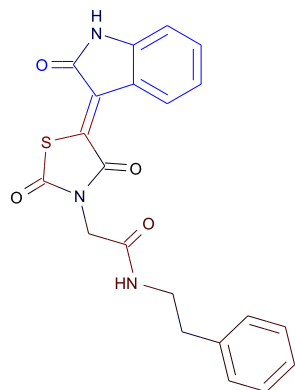

$C_{21}H_{17}N_3O_4S$

Molecular Weight: 407.44237

ALogP: 2.027

Rotatable Bonds: 5

Acceptors: 5

Donors: 2

### Model Prediction

Prediction: 0.0695

Unit: g/kg\_body\_weight

Mahalanobis Distance: 32.5

Mahalanobis Distance p-value: 3.22e-029

Mahalanobis Distance: The Mahalanobis distance (MD) is a generalization of the Euclidean distance that accounts for correlations among the X properties. It is calculated as the distance to the center of the training data. The larger the MD, the less trustworthy the prediction.

Mahalanobis Distance p-value: The p-value gives the fraction of training data with an MD greater than or equal to the one for the given sample, assuming normally distributed data. The smaller the p-value, the less trustworthy the prediction. For highly non-normal X properties (e.g., fingerprints), the MD p-value is wildly inaccurate.

### Structural Similar Compounds

| Name                        | GLIPIZIDE | DANTROLENE.NA | CHLORSULFURON                   |
|-----------------------------|-----------|---------------|---------------------------------|
| Structure                   |           |               |                                 |
| Actual Endpoint (-log C)    | 3.94991   | 4.19625       | 4.15566                         |
| Predicted Endpoint (-log C) | 3.95594   | 4.62637       | 3.79771                         |
| Distance                    | 0.583     | 0.600         | 0.614                           |
| Reference                   | NDA-17583 | NDA-17443     | EPA COVER SHEET 0027;880301;(1) |

### Model Applicability

Unknown features are fingerprint features in the query molecule, but not found or appearing too infrequently in the training set.

1. OPS PC22 out of range. Value: -5.6255. Training min, max, SD, explained variance: -4.3287, 5.3383, 1.588, 0.0110.
2. Unknown ECFP\_6 feature: -154530762: [\*]N[\*]
3. Unknown ECFP\_6 feature: 912478223: [\*]S[\*]
4. Unknown ECFP\_6 feature: 1997021792: [\*]:[cH]:[cH]:[cH]:[\*]
5. Unknown ECFP\_6 feature: 1335833675: [\*]N[c](:[cH]:[\*]):[c]([\*]):[\*]
6. Unknown ECFP\_6 feature: -1699286547: [\*]C(=[\*])N[c](:[\*]):[\*]
7. Unknown ECFP\_6 feature: 1298725959: [\*]NC(=O)C(=[\*])[\*]
8. Unknown ECFP\_6 feature: 1790105651: [\*]C(=C1C(=[\*])[\*]:[c]1:[\*])[\*]
9. Unknown ECFP\_6 feature: -631778390: [\*]C(=C1S[\*][\*]C1=[\*])[\*]
10. Unknown ECFP\_6 feature: 2122741631: [\*]=C1[\*][\*]C(=[\*])S1
11. Unknown ECFP\_6 feature: 190445529: [\*]N1[\*][\*]SC1=O
12. Unknown ECFP\_6 feature: -661097313: [\*]CN1C(=[\*])[\*][\*]C1=[\*]
13. Unknown ECFP\_6 feature: 1945129186: [\*]N1[\*][\*]C(=[\*])C1=O
14. Unknown ECFP\_6 feature: -37698365: [\*]N([\*])CC(=[\*])[\*]
15. Unknown ECFP\_6 feature: 1731843802: [\*]CC(=O)N[\*]
16. Unknown ECFP\_6 feature: 497523368: [\*]CNC(=[\*])[\*]
17. Unknown ECFP\_6 feature: -1791034651: [\*]CCN[\*]
18. Unknown ECFP\_6 feature: -1795525632: [\*]CC[c](:[\*]):[\*]

## Feature Contribution

| Top features for positive contribution |             |                                                                                                                                         |        |
|----------------------------------------|-------------|-----------------------------------------------------------------------------------------------------------------------------------------|--------|
| Fingerprint                            | Bit/Smiles  | Feature Structure                                                                                                                       | Score  |
| FCFP_6                                 | -1143715940 | 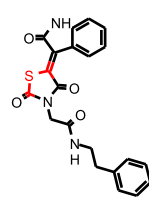<br><chem>[*]=C1[*][*]C(=[*])S1</chem>               | 0.13   |
| ECFP_6                                 | 1559650422  | <br><chem>[*]C[*]</chem>                             | 0.129  |
| FCFP_6                                 | 3           | <br><chem>[*]N[*]</chem>                             | 0.0924 |
| Top Features for negative contribution |             |                                                                                                                                         |        |
| Fingerprint                            | Bit/Smiles  | Feature Structure                                                                                                                       | Score  |
| FCFP_6                                 | 991735244   | <br><chem>[*][c]1:[*]:[cH]:[cH]:[cH]:[cH]:1</chem> | -0.134 |

|        |            |                                                                                                                                                            |        |
|--------|------------|------------------------------------------------------------------------------------------------------------------------------------------------------------|--------|
| ECFP_6 | 1564392544 | 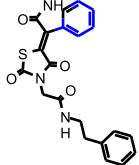 <p data-bbox="1386 284 1575 341">[*][c]1:[*]:[cH]:[cH]:[cH]:[cH]:1</p> | -0.133 |
| ECFP_6 | 2106656448 |  <p data-bbox="1428 592 1554 625">[*]C(=O)[*]</p>                       | -0.11  |

# Sorafenib

# TOPKAT\_Chronic\_LOAEL

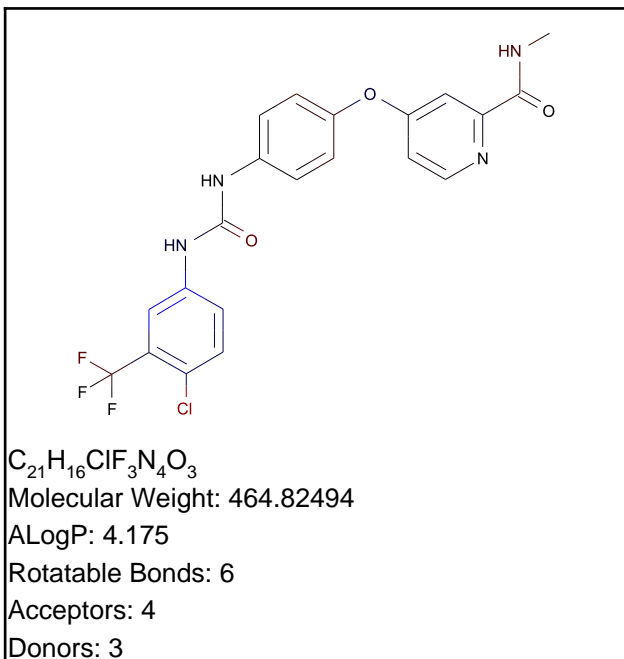

## Model Prediction

Prediction: 0.00483

Unit: g/kg\_body\_weight

Mahalanobis Distance: 30

Mahalanobis Distance p-value: 1.21e-024

Mahalanobis Distance: The Mahalanobis distance (MD) is a generalization of the Euclidean distance that accounts for correlations among the X properties. It is calculated as the distance to the center of the training data. The larger the MD, the less trustworthy the prediction.

Mahalanobis Distance p-value: The p-value gives the fraction of training data with an MD greater than or equal to the one for the given sample, assuming normally distributed data. The smaller the p-value, the less trustworthy the prediction. For highly non-normal X properties (e.g., fingerprints), the MD p-value is wildly inaccurate.

## Structural Similar Compounds

| Name                        | GLYBURIDE                                                                           | D & C RED 9                                                                         | SODIUM ACIFLUORFEN                                                                  |
|-----------------------------|-------------------------------------------------------------------------------------|-------------------------------------------------------------------------------------|-------------------------------------------------------------------------------------|
| Structure                   | 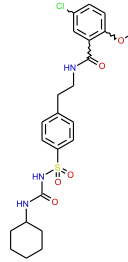 |  |  |
| Actual Endpoint (-log C)    | 4.21661                                                                             | 3.87715                                                                             | 4.16036                                                                             |
| Predicted Endpoint (-log C) | 4.21035                                                                             | 3.6546                                                                              | 4.65915                                                                             |
| Distance                    | 0.636                                                                               | 0.722                                                                               | 0.736                                                                               |
| Reference                   | UPJ-26452                                                                           | NTP REPORT # 225                                                                    | EPA COVER SHEET 0192;891101;(1)                                                     |

## Model Applicability

Unknown features are fingerprint features in the query molecule, but not found or appearing too infrequently in the training set.

1. All properties and OPS components are within expected ranges.
2. Unknown ECFP\_6 feature: -1046436026: [\*]F
3. Unknown ECFP\_6 feature: 99947387: [\*]:c(:[\*])Cl
4. Unknown ECFP\_6 feature: 226796801: [\*]C([\*])([\*])F
5. Unknown ECFP\_6 feature: 1305253718: [\*]:c(:[\*])O[c(:[\*]):[\*]]
6. Unknown ECFP\_6 feature: -677309799: [\*]:c(:[\*]):n:[cH]:[\*]
7. Unknown ECFP\_6 feature: 1338334141: [\*]C(=[\*])NC
8. Unknown ECFP\_6 feature: -177077903: [\*]N[c(:[cH]:[\*]):[cH]:[\*]]
9. Unknown ECFP\_6 feature: 1336678434: [\*]:c(:[\*]):c(:[cH]:[\*])C([\*])([\*])[\*]
10. Unknown ECFP\_6 feature: -649580166: [\*]NC(=O)N[\*]
11. Unknown ECFP\_6 feature: -1952889961: [\*]:c(:[\*])C(F)(F)F
12. Unknown ECFP\_6 feature: 1413420509: [\*]C(=[\*])[c(:[cH]:[\*]):n:[\*]]
13. Unknown ECFP\_6 feature: 1996163143: [\*]:[cH]:[cH]:n:[\*]
14. Unknown ECFP\_6 feature: 1430169877: [\*]NC(=O)[c(:[\*]):[\*]]
15. Unknown ECFP\_6 feature: 864287155: [\*]NC

## Feature Contribution

Top features for positive contribution



| Fingerprint                                   | Bit/Smiles | Feature Structure                                                                                                                    | Score  |
|-----------------------------------------------|------------|--------------------------------------------------------------------------------------------------------------------------------------|--------|
| ECFP_6                                        | -176455838 | 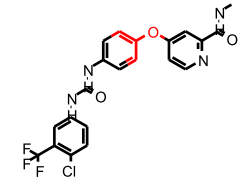<br><chem>[*]O[c](:[cH]:[*]):[c<br/>H]:[*]</chem> | 0.106  |
| FCFP_6                                        | 32         | <br><chem>[*]Cl</chem>                            | 0.101  |
| FCFP_6                                        | 3          | <br><chem>[*]N[*]</chem>                          | 0.0924 |
| <b>Top Features for negative contribution</b> |            |                                                                                                                                      |        |
| Fingerprint                                   | Bit/Smiles | Feature Structure                                                                                                                    | Score  |
| FCFP_6                                        | 1          | <br><chem>[*]=O</chem>                          | -0.102 |

|               |                   |                                                                                                                                                         |                |
|---------------|-------------------|---------------------------------------------------------------------------------------------------------------------------------------------------------|----------------|
| <p>ECFP_6</p> | <p>1236483485</p> | 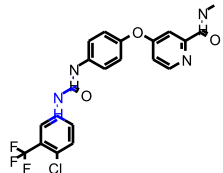 <p><chem>[*]C(=O)N(c1ccc(Oc2cc(O)nc2)cc1)c3ccc(Cl)c(F)c3</chem></p> | <p>-0.0747</p> |
| <p>FCFP_6</p> | <p>203677720</p>  |  <p><chem>[*][c]1ccc(Cl)c(F)c1N2C(=O)NCC2</chem></p>                 | <p>-0.0713</p> |

# Sunitinib

# TOPKAT\_Chronic\_LOAEL

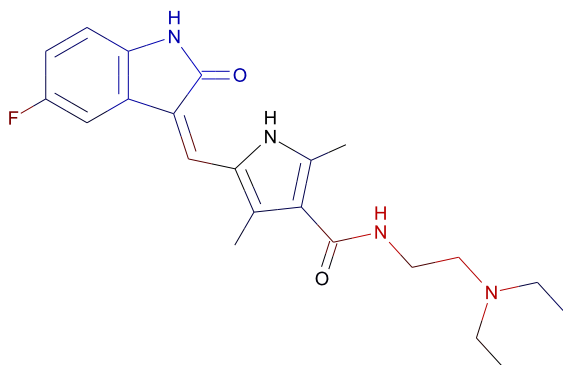

$C_{22}H_{27}FN_4O_2$

Molecular Weight: 398.47378

ALogP: 2.997

Rotatable Bonds: 7

Acceptors: 3

Donors: 3

## Model Prediction

Prediction: 0.0397

Unit: g/kg\_body\_weight

Mahalanobis Distance: 38.1

Mahalanobis Distance p-value: 6.11e-039

Mahalanobis Distance: The Mahalanobis distance (MD) is a generalization of the Euclidean distance that accounts for correlations among the X properties. It is calculated as the distance to the center of the training data. The larger the MD, the less trustworthy the prediction.

Mahalanobis Distance p-value: The p-value gives the fraction of training data with an MD greater than or equal to the one for the given sample, assuming normally distributed data. The smaller the p-value, the less trustworthy the prediction. For highly non-normal X properties (e.g., fingerprints), the MD p-value is wildly inaccurate.

## Structural Similar Compounds

| Name                        | METOCLOPRAMIDE | PROPAFENONE.HCL | ISOXABEN                        |
|-----------------------------|----------------|-----------------|---------------------------------|
| Structure                   |                |                 |                                 |
| Actual Endpoint (-log C)    | 4.47683        | 3.10196         | 3.81665                         |
| Predicted Endpoint (-log C) | 3.8785         | 2.93237         | 4.42315                         |
| Distance                    | 0.630          | 0.693           | 0.693                           |
| Reference                   | NDA-17854      | NDA-19151       | EPA COVER SHEET 0339;881201;(1) |

## Model Applicability

Unknown features are fingerprint features in the query molecule, but not found or appearing too infrequently in the training set.

1. All properties and OPS components are within expected ranges.
2. Unknown ECFP\_6 feature: -1046436026: [\*]F
3. Unknown ECFP\_6 feature: -152683720: [\*]:[nH]:[\*]
4. Unknown ECFP\_6 feature: -154530762: [\*]N[\*]
5. Unknown ECFP\_6 feature: 220735655: [\*]:[c]:[\*]F
6. Unknown ECFP\_6 feature: -1866225067: [\*]CN(C[\*])C[\*]
7. Unknown ECFP\_6 feature: 558201926: [\*][c]1:[\*]:[\*]:[c]([\*]):[nH]:1
8. Unknown ECFP\_6 feature: 497523368: [\*]CNC(=[\*])[\*]
9. Unknown ECFP\_6 feature: -1699286547: [\*]C(=[\*])N[c](:[\*]):[\*]
10. Unknown ECFP\_6 feature: -1789942192: [\*]CCN([\*])[\*]
11. Unknown ECFP\_6 feature: -1658273810: [\*]C(=[\*])[c]1:[c]([\*]):[\*]:[\*]:[c]:1[\*]
12. Unknown ECFP\_6 feature: 1576255326: [\*][c]1:[\*]:[\*]:[c]([\*]):[c]:1C
13. Unknown ECFP\_6 feature: 980271847: [\*][c]1:[\*]:[\*]:[nH]:[c]:1C=[\*]
14. Unknown ECFP\_6 feature: -1791034651: [\*]CCN[\*]
15. Unknown ECFP\_6 feature: 1791989338: [\*][c]1:[\*]:[\*]:[nH]:[c]:1C
16. Unknown ECFP\_6 feature: -949131419: [\*]N([\*])CC
17. Unknown ECFP\_6 feature: 1430169877: [\*]NC(=O)[c](:[\*]):[\*]
18. Unknown ECFP\_6 feature: 1718013682: [\*]C=C\1/C(=[\*])[\*]:[\*]:[c]1:[\*]
19. Unknown ECFP\_6 feature: 1182722866: [\*]C(=CC(=[\*])[\*])[\*]

20. Unknown ECFP\_6 feature: 1335833675: [\*]N[c](:[cH]:[\*]):[c]([\*]):[\*]  
 21. Unknown ECFP\_6 feature: 1298725959: [\*]NC(=O)C(=[\*])[\*]  
 22. Unknown ECFP\_6 feature: -176686665: [\*]:[cH]:[c](F):[cH]:[\*]

## Feature Contribution

### Top features for positive contribution

| Fingerprint | Bit/Smiles | Feature Structure                                                                               | Score  |
|-------------|------------|-------------------------------------------------------------------------------------------------|--------|
| ECFP_6      | 1559650422 | 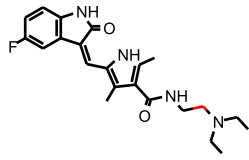<br>[*]C[*]  | 0.129  |
| FCFP_6      | 32         | <br>[*]Cl    | 0.101  |
| FCFP_6      | 3          | <br>[*]N[*] | 0.0924 |

### Top Features for negative contribution

| Fingerprint | Bit/Smiles | Feature Structure | Score |
|-------------|------------|-------------------|-------|
|             |            |                   |       |

|        |            |                                                                                                                                      |         |
|--------|------------|--------------------------------------------------------------------------------------------------------------------------------------|---------|
| ECFP_6 | 2106656448 | 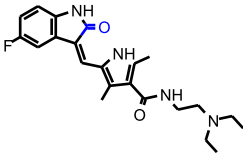 <p data-bbox="1417 300 1543 341">[*]C(=O)[*]</p> | -0.11   |
| FCFP_6 | 1          |  <p data-bbox="1459 568 1533 609">[*]=O</p>       | -0.102  |
| FCFP_6 | 136597326  |  <p data-bbox="1459 836 1533 876">[*]CC</p>       | -0.0815 |

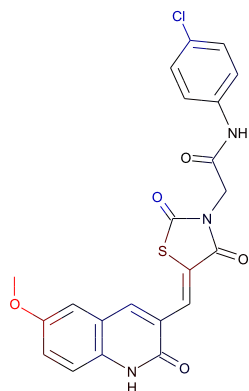

$C_{22}H_{16}ClN_3O_5S$

Molecular Weight: 469.89753

ALogP: 2.815

Rotatable Bonds: 5

Acceptors: 6

Donors: 2

### Model Prediction

Prediction: 0.0264

Unit: g/kg\_body\_weight

Mahalanobis Distance: 11.5

Mahalanobis Distance p-value: 1.06e-007

Mahalanobis Distance: The Mahalanobis distance (MD) is a generalization of the Euclidean distance that accounts for correlations among the X properties. It is calculated as the distance to the center of the training data. The larger the MD, the less trustworthy the prediction.

Mahalanobis Distance p-value: The p-value gives the fraction of training data with an MD greater than or equal to the one for the given sample, assuming normally distributed data. The smaller the p-value, the less trustworthy the prediction. For highly non-normal X properties (e.g., fingerprints), the MD p-value is wildly inaccurate.

### Structural Similar Compounds

| Name                        | FUROSEMIDE     | SALICYLAZOSULFAPYRIDINE | COUMAPHOS     |
|-----------------------------|----------------|-------------------------|---------------|
| Structure                   |                |                         |               |
| Actual Endpoint (-log C)    | 4.04236        | 3.375                   | 5.60537       |
| Predicted Endpoint (-log C) | 2.8614         | 2.80292                 | 4.15004       |
| Distance                    | 0.665          | 0.740                   | 0.766         |
| Reference                   | NCI/NTP TR-356 | NCI/NTP TR-457          | NCI/NTP TR-96 |

### Model Applicability

Unknown features are fingerprint features in the query molecule, but not found or appearing too infrequently in the training set.

1. OPS PC5 out of range. Value: 5.3542. Training min, max, SD, explained variance: -3.3892, 5.0834, 1.644, 0.0611.

### Feature Contribution

| Top features for positive contribution |            |                   |       |
|----------------------------------------|------------|-------------------|-------|
| Fingerprint                            | Bit/Smiles | Feature Structure | Score |
| FCFP_2                                 | 136627117  | <br>[*]OC         | 0.173 |

|                                               |                   |                                                                                                                                        |              |
|-----------------------------------------------|-------------------|----------------------------------------------------------------------------------------------------------------------------------------|--------------|
| FCFP_2                                        | -1143715940       | 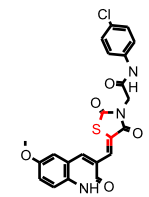<br><chem>[*]=C1[*][*]C(=[*])S1</chem>              | 0.095        |
| FCFP_2                                        | 1036089772        | <br><chem>[*]:[c](:[*])OC</chem>                    | 0.0749       |
| <b>Top Features for negative contribution</b> |                   |                                                                                                                                        |              |
| <b>Fingerprint</b>                            | <b>Bit/Smiles</b> | <b>Feature Structure</b>                                                                                                               | <b>Score</b> |
| FCFP_2                                        | 71476542          | <br><chem>[*]:[c](:[*])Cl</chem>                    | -0.134       |
| FCFP_2                                        | 1872154524        | <br><chem>[*]C(=O)[*]</chem>                      | -0.105       |
| FCFP_2                                        | 203677720         | <br><chem>[*][c](:[*]):[c](C=[*]):[cH]:[*]</chem> | -0.0829      |





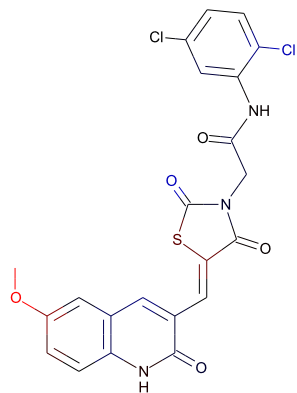
 $C_{22}H_{15}Cl_2N_3O_5S$ 

Molecular Weight: 504.3426

ALogP: 3.479

Rotatable Bonds: 5

Acceptors: 6

Donors: 2

### Model Prediction

Prediction: 0.0211

Unit: g/kg\_body\_weight

Mahalanobis Distance: 11.6

Mahalanobis Distance p-value: 6.59e-008

Mahalanobis Distance: The Mahalanobis distance (MD) is a generalization of the Euclidean distance that accounts for correlations among the X properties. It is calculated as the distance to the center of the training data. The larger the MD, the less trustworthy the prediction.

Mahalanobis Distance p-value: The p-value gives the fraction of training data with an MD greater than or equal to the one for the given sample, assuming normally distributed data. The smaller the p-value, the less trustworthy the prediction. For highly non-normal X properties (e.g., fingerprints), the MD p-value is wildly inaccurate.

### Structural Similar Compounds

| Name                        | FUROSEMIDE     | SALICYLAZOSULFAPYRIDINE | COUMAPHOS     |
|-----------------------------|----------------|-------------------------|---------------|
| Structure                   |                |                         |               |
| Actual Endpoint (-log C)    | 4.04236        | 3.375                   | 5.60537       |
| Predicted Endpoint (-log C) | 2.8614         | 2.80292                 | 4.15004       |
| Distance                    | 0.730          | 0.759                   | 0.783         |
| Reference                   | NCI/NTP TR-356 | NCI/NTP TR-457          | NCI/NTP TR-96 |

### Model Applicability

Unknown features are fingerprint features in the query molecule, but not found or appearing too infrequently in the training set.

1. OPS PC5 out of range. Value: 5.472. Training min, max, SD, explained variance: -3.3892, 5.0834, 1.644, 0.0611.
2. OPS PC9 out of range. Value: 3.4423. Training min, max, SD, explained variance: -2.8548, 3.3954, 1.263, 0.0360.

### Feature Contribution

#### Top features for positive contribution

| Fingerprint | Bit/Smiles | Feature Structure | Score |
|-------------|------------|-------------------|-------|
| FCFP_2      | 136627117  | <br>[*]OC         | 0.173 |

|                                               |                   |                                                                                                                                       |              |
|-----------------------------------------------|-------------------|---------------------------------------------------------------------------------------------------------------------------------------|--------------|
| FCFP_2                                        | -1143715940       | 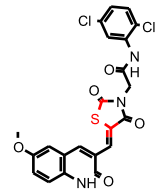<br><chem>[*]=C1[*][*]C(=[*])S1</chem>             | 0.095        |
| FCFP_2                                        | 1036089772        | <br><chem>[*]:[c](:[*])OC</chem>                   | 0.0749       |
| <b>Top Features for negative contribution</b> |                   |                                                                                                                                       |              |
| <b>Fingerprint</b>                            | <b>Bit/Smiles</b> | <b>Feature Structure</b>                                                                                                              | <b>Score</b> |
| FCFP_2                                        | 71476542          | <br><chem>[*]:[c](:[*])Cl</chem>                   | -0.134       |
| FCFP_2                                        | 1872154524        | <br><chem>[*]C(=O)[*]</chem>                     | -0.105       |
| FCFP_2                                        | 203677720         | <br><chem>[*][c](:[*]):[c](C=[*])[cH]:[*]</chem> | -0.0829      |



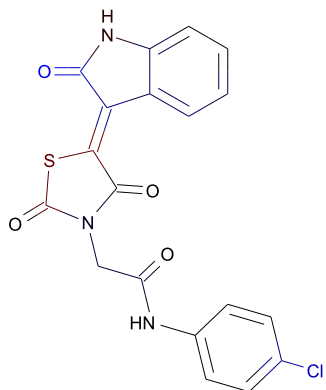

$C_{19}H_{12}ClN_3O_4S$

Molecular Weight: 413.83428

ALogP: 2.363

Rotatable Bonds: 3

Acceptors: 5

Donors: 2

### Model Prediction

Prediction: 0.0592

Unit: g/kg\_body\_weight

Mahalanobis Distance: 10.1

Mahalanobis Distance p-value: 2.57e-005

Mahalanobis Distance: The Mahalanobis distance (MD) is a generalization of the Euclidean distance that accounts for correlations among the X properties. It is calculated as the distance to the center of the training data. The larger the MD, the less trustworthy the prediction.

Mahalanobis Distance p-value: The p-value gives the fraction of training data with an MD greater than or equal to the one for the given sample, assuming normally distributed data. The smaller the p-value, the less trustworthy the prediction. For highly non-normal X properties (e.g., fingerprints), the MD p-value is wildly inaccurate.

### Structural Similar Compounds

| Name                        | FUROSEMIDE     | DAPSONE       | ACETOHEXAMIDE  |
|-----------------------------|----------------|---------------|----------------|
| Structure                   |                |               |                |
| Actual Endpoint (-log C)    | 4.04236        | 3.66258       | 2.55683        |
| Predicted Endpoint (-log C) | 2.8614         | 3.26993       | 3.62413        |
| Distance                    | 0.586          | 0.644         | 0.661          |
| Reference                   | NCI/NTP TR-356 | NCI/NTP TR-20 | NCI/NTP TR-050 |

### Model Applicability

Unknown features are fingerprint features in the query molecule, but not found or appearing too infrequently in the training set.

- OPS PC5 out of range. Value: 5.5028. Training min, max, SD, explained variance: -3.3892, 5.0834, 1.644, 0.0611.

### Feature Contribution

#### Top features for positive contribution

| Fingerprint | Bit/Smiles  | Feature Structure                      | Score |
|-------------|-------------|----------------------------------------|-------|
| FCFP_2      | -1143715940 | <br><chem>[*]=C1[*][*]C(=[*])S1</chem> | 0.095 |

|                                               |                   |                                                                                                                                       |              |
|-----------------------------------------------|-------------------|---------------------------------------------------------------------------------------------------------------------------------------|--------------|
| FCFP_2                                        | 3                 | 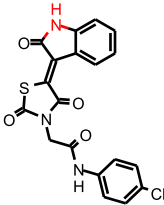<br><chem>[*]N[*]</chem>                           | 0.0737       |
| FCFP_2                                        | 565998553         | <br><chem>[*]N1[*][*]C(=[*])C1=O</chem>            | 0.00813      |
| <b>Top Features for negative contribution</b> |                   |                                                                                                                                       |              |
| <b>Fingerprint</b>                            | <b>Bit/Smiles</b> | <b>Feature Structure</b>                                                                                                              | <b>Score</b> |
| FCFP_2                                        | 71476542          | <br><chem>[*]:[c](:[*])Cl</chem>                   | -0.134       |
| FCFP_2                                        | 1872154524        | <br><chem>[*]C(=O)[*]</chem>                     | -0.105       |
| FCFP_2                                        | 203677720         | <br><chem>[*][c](:[*]):[c](C=[*])[cH]:[*]</chem> | -0.0829      |



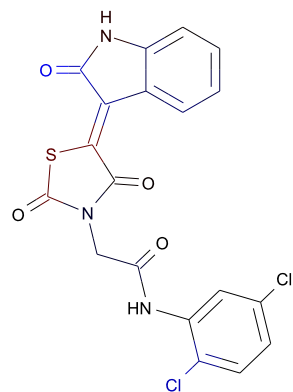
 $C_{19}H_{11}Cl_2N_3O_4S$ 

Molecular Weight: 448.27933

ALogP: 3.028

Rotatable Bonds: 3

Acceptors: 5

Donors: 2

### Model Prediction

Prediction: 0.0478

Unit: g/kg\_body\_weight

Mahalanobis Distance: 10.2

Mahalanobis Distance p-value: 1.82e-005

Mahalanobis Distance: The Mahalanobis distance (MD) is a generalization of the Euclidean distance that accounts for correlations among the X properties. It is calculated as the distance to the center of the training data. The larger the MD, the less trustworthy the prediction.

Mahalanobis Distance p-value: The p-value gives the fraction of training data with an MD greater than or equal to the one for the given sample, assuming normally distributed data. The smaller the p-value, the less trustworthy the prediction. For highly non-normal X properties (e.g., fingerprints), the MD p-value is wildly inaccurate.

### Structural Similar Compounds

| Name                        | FUROSEMIDE     | 1-AMINO-2,4-DIBROMOANTHRAQUINONE | OXAZEPAM       |
|-----------------------------|----------------|----------------------------------|----------------|
| Structure                   |                |                                  |                |
| Actual Endpoint (-log C)    | 4.04236        | 2.82966                          | 3.05262        |
| Predicted Endpoint (-log C) | 2.8614         | 3.92444                          | 3.13073        |
| Distance                    | 0.639          | 0.676                            | 0.696          |
| Reference                   | NCI/NTP TR-356 | NCI/NTP TR-383                   | NCI/NTP TR-468 |

### Model Applicability

Unknown features are fingerprint features in the query molecule, but not found or appearing too infrequently in the training set.

- OPS PC5 out of range. Value: 5.6206. Training min, max, SD, explained variance: -3.3892, 5.0834, 1.644, 0.0611.

### Feature Contribution

#### Top features for positive contribution

| Fingerprint | Bit/Smiles  | Feature Structure                      | Score |
|-------------|-------------|----------------------------------------|-------|
| FCFP_2      | -1143715940 | <br><chem>[*]=C1[*][*]C(=[*])S1</chem> | 0.095 |

|                                               |                   |                                                                                                                                       |              |
|-----------------------------------------------|-------------------|---------------------------------------------------------------------------------------------------------------------------------------|--------------|
| FCFP_2                                        | 3                 | 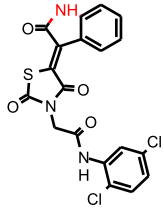<br><chem>[*]N[*]</chem>                           | 0.0737       |
| FCFP_2                                        | 565998553         | <br><chem>[*]N1[*][*]C(=O)C1=O</chem>              | 0.00813      |
| <b>Top Features for negative contribution</b> |                   |                                                                                                                                       |              |
| <b>Fingerprint</b>                            | <b>Bit/Smiles</b> | <b>Feature Structure</b>                                                                                                              | <b>Score</b> |
| FCFP_2                                        | 71476542          | <br><chem>[*]:[c](:[*])Cl</chem>                   | -0.134       |
| FCFP_2                                        | 1872154524        | <br><chem>[*]C(=O)[*]</chem>                      | -0.105       |
| FCFP_2                                        | 203677720         | <br><chem>[*][c](:[*]):[c](C=[*])[cH]:[*]</chem> | -0.0829      |





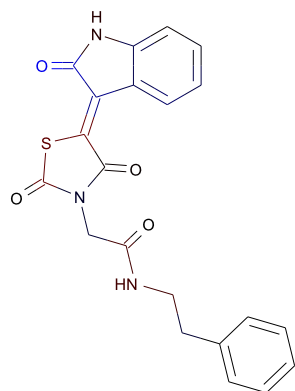

$C_{21}H_{17}N_3O_4S$

Molecular Weight: 407.44237

ALogP: 2.027

Rotatable Bonds: 5

Acceptors: 5

Donors: 2

### Model Prediction

Prediction: 0.0423

Unit: g/kg\_body\_weight

Mahalanobis Distance: 11.7

Mahalanobis Distance p-value: 4.23e-008

Mahalanobis Distance: The Mahalanobis distance (MD) is a generalization of the Euclidean distance that accounts for correlations among the X properties. It is calculated as the distance to the center of the training data. The larger the MD, the less trustworthy the prediction.

Mahalanobis Distance p-value: The p-value gives the fraction of training data with an MD greater than or equal to the one for the given sample, assuming normally distributed data. The smaller the p-value, the less trustworthy the prediction. For highly non-normal X properties (e.g., fingerprints), the MD p-value is wildly inaccurate.

### Structural Similar Compounds

| Name                        | FUROSEMIDE     | ACETOHEXAMIDE  | DAPSONE       |
|-----------------------------|----------------|----------------|---------------|
| Structure                   |                |                |               |
| Actual Endpoint (-log C)    | 4.04236        | 2.55683        | 3.66258       |
| Predicted Endpoint (-log C) | 2.8614         | 3.62413        | 3.26993       |
| Distance                    | 0.613          | 0.631          | 0.666         |
| Reference                   | NCI/NTP TR-356 | NCI/NTP TR-050 | NCI/NTP TR-20 |

### Model Applicability

Unknown features are fingerprint features in the query molecule, but not found or appearing too infrequently in the training set.

1. All properties and OPS components are within expected ranges.

### Feature Contribution

#### Top features for positive contribution

| Fingerprint | Bit/Smiles | Feature Structure   | Score |
|-------------|------------|---------------------|-------|
| FCFP_2      | -885550502 | <br>[*]CNC(=[*])[*] | 0.115 |

|                                               |                   |                                                                                                                                        |              |
|-----------------------------------------------|-------------------|----------------------------------------------------------------------------------------------------------------------------------------|--------------|
| FCFP_2                                        | -1143715940       | 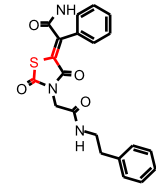<br><chem>[*]=C1[*][*]C(=[*])S1</chem>              | 0.095        |
| FCFP_2                                        | 3                 | <br><chem>[*]N[*]</chem>                            | 0.0737       |
| <b>Top Features for negative contribution</b> |                   |                                                                                                                                        |              |
| <b>Fingerprint</b>                            | <b>Bit/Smiles</b> | <b>Feature Structure</b>                                                                                                               | <b>Score</b> |
| FCFP_2                                        | 1872154524        | <br><chem>[*]C(=O)[*]</chem>                        | -0.105       |
| FCFP_2                                        | 203677720         | <br><chem>[*][c](:[*]):[c](C=[*]):[cH]:[*]</chem> | -0.0829      |
| FCFP_2                                        | 1                 | <br><chem>[*]=O</chem>                            | -0.0796      |



# Sorafenib

# TOPKAT\_Rat\_Maximum\_Tolerated\_Dose\_Feed

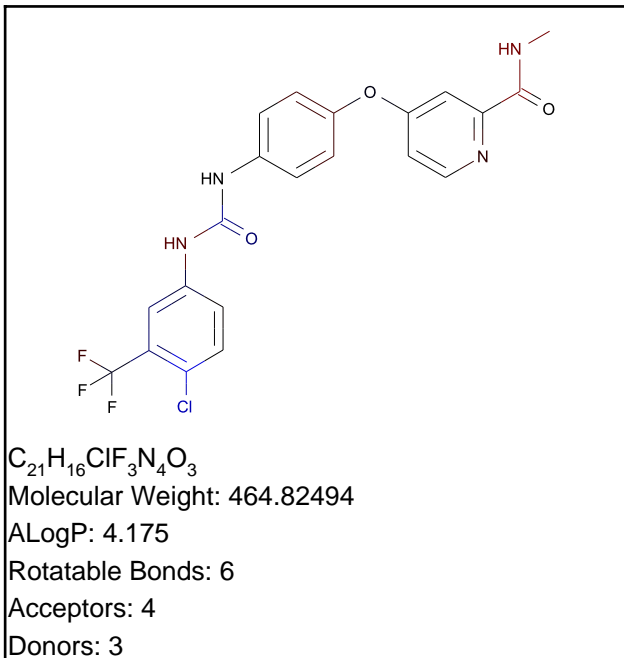

## Model Prediction

Prediction: 0.0885

Unit: g/kg\_body\_weight

Mahalanobis Distance: 12.4

Mahalanobis Distance p-value: 1.76e-009

Mahalanobis Distance: The Mahalanobis distance (MD) is a generalization of the Euclidean distance that accounts for correlations among the X properties. It is calculated as the distance to the center of the training data. The larger the MD, the less trustworthy the prediction.

Mahalanobis Distance p-value: The p-value gives the fraction of training data with an MD greater than or equal to the one for the given sample, assuming normally distributed data. The smaller the p-value, the less trustworthy the prediction. For highly non-normal X properties (e.g., fingerprints), the MD p-value is wildly inaccurate.

## Structural Similar Compounds

| Name                        | FUROSEMIDE                                                                          | PHENOLPHTHALEIN                                                                     | DISPERSE YELLOW 3                                                                   |
|-----------------------------|-------------------------------------------------------------------------------------|-------------------------------------------------------------------------------------|-------------------------------------------------------------------------------------|
| Structure                   | 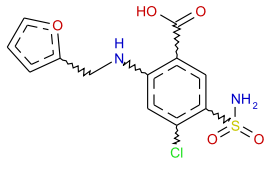 |  |  |
| Actual Endpoint (-log C)    | 4.04236                                                                             | 2.20184                                                                             | 2.77703                                                                             |
| Predicted Endpoint (-log C) | 2.8614                                                                              | 2.8857                                                                              | 2.80195                                                                             |
| Distance                    | 0.741                                                                               | 0.780                                                                               | 0.799                                                                               |
| Reference                   | NCI/NTP TR-356                                                                      | NCI/NTP TR-465                                                                      | NCI/NTP TR-222                                                                      |

## Model Applicability

Unknown features are fingerprint features in the query molecule, but not found or appearing too infrequently in the training set.

- All properties and OPS components are within expected ranges.

## Feature Contribution

### Top features for positive contribution

| Fingerprint | Bit/Smiles | Feature Structure                                                                                                     | Score |
|-------------|------------|-----------------------------------------------------------------------------------------------------------------------|-------|
| FCFP_2      | -885550502 | 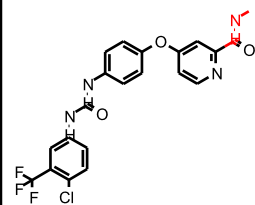<br><chem>[*]CNC(=[*])[*]</chem> | 0.115 |

|                                               |                   |                                                                                                                               |              |
|-----------------------------------------------|-------------------|-------------------------------------------------------------------------------------------------------------------------------|--------------|
| FCFP_2                                        | 3                 | 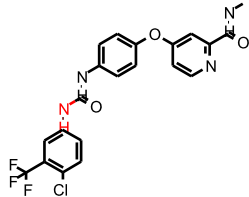<br>[*]N[*]                                | 0.0737       |
| FCFP_2                                        | 332760439         | <br>[*]O[c](:[cH]:[*]):[c<br>H]:[*]        | 0.0611       |
| <b>Top Features for negative contribution</b> |                   |                                                                                                                               |              |
| <b>Fingerprint</b>                            | <b>Bit/Smiles</b> | <b>Feature Structure</b>                                                                                                      | <b>Score</b> |
| FCFP_2                                        | 71476542          | <br>[*]:[c](:[*])Cl                        | -0.134       |
| FCFP_2                                        | 1872154524        | <br>[*]C(=O)[*]                          | -0.105       |
| FCFP_2                                        | 203677720         | <br>[*][c](:[*]):[c](C=[*<br>]):[cH]:[*] | -0.0829      |



# Sunitinib

# TOPKAT\_Rat\_Maximum\_Tolerated\_Dose\_Feed

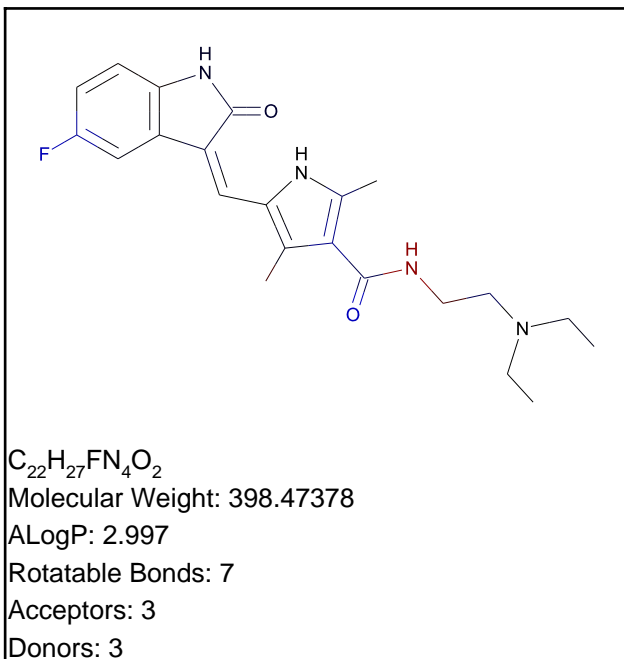

## Model Prediction

Prediction: 0.178

Unit: g/kg\_body\_weight

Mahalanobis Distance: 9.78

Mahalanobis Distance p-value: 9.94e-005

Mahalanobis Distance: The Mahalanobis distance (MD) is a generalization of the Euclidean distance that accounts for correlations among the X properties. It is calculated as the distance to the center of the training data. The larger the MD, the less trustworthy the prediction.

Mahalanobis Distance p-value: The p-value gives the fraction of training data with an MD greater than or equal to the one for the given sample, assuming normally distributed data. The smaller the p-value, the less trustworthy the prediction. For highly non-normal X properties (e.g., fingerprints), the MD p-value is wildly inaccurate.

## Structural Similar Compounds

| Name                        | CHLORPROPAMIDE                                                                      | DISPERSE YELLOW 3                                                                   | TOLBUTAMIDE                                                                         |
|-----------------------------|-------------------------------------------------------------------------------------|-------------------------------------------------------------------------------------|-------------------------------------------------------------------------------------|
| Structure                   | 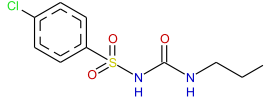 |  |  |
| Actual Endpoint (-log C)    | 3.0107                                                                              | 2.77703                                                                             | 2.3985                                                                              |
| Predicted Endpoint (-log C) | 3.18321                                                                             | 2.80195                                                                             | 3.32272                                                                             |
| Distance                    | 0.657                                                                               | 0.661                                                                               | 0.672                                                                               |
| Reference                   | NCI/NTP TR-045                                                                      | NCI/NTP TR-222                                                                      | NCI/NTP TR-031                                                                      |

## Model Applicability

Unknown features are fingerprint features in the query molecule, but not found or appearing too infrequently in the training set.

1. All properties and OPS components are within expected ranges.

## Feature Contribution

### Top features for positive contribution

| Fingerprint | Bit/Smiles | Feature Structure                                                                                                     | Score |
|-------------|------------|-----------------------------------------------------------------------------------------------------------------------|-------|
| FCFP_2      | -885550502 | 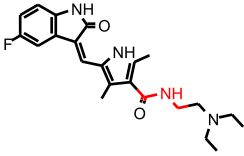<br><chem>[*]CNC(=[*])[*]</chem> | 0.115 |



|                                               |                   |                                                                                                                               |              |
|-----------------------------------------------|-------------------|-------------------------------------------------------------------------------------------------------------------------------|--------------|
| FCFP_2                                        | 3                 | 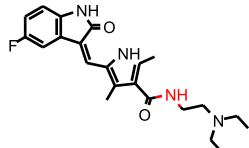<br>[*]N[*]                                | 0.0737       |
| FCFP_2                                        | 136120670         | <br>[*]:[c](:[*])C                         | 0.064        |
| <b>Top Features for negative contribution</b> |                   |                                                                                                                               |              |
| <b>Fingerprint</b>                            | <b>Bit/Smiles</b> | <b>Feature Structure</b>                                                                                                      | <b>Score</b> |
| FCFP_2                                        | 71476542          | <br>[*]:[c](:[*])Cl                        | -0.134       |
| FCFP_2                                        | 1872154524        | <br>[*]C(=O)[*]                          | -0.105       |
| FCFP_2                                        | 203677720         | <br>[*][c](:[*]):[c](C=[*]<br>):[cH]:[*] | -0.0829      |



10a

TOPKAT\_Rat\_Maximum\_Tolerated\_Dose\_Gavage

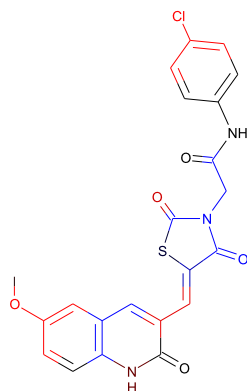C<sub>22</sub>H<sub>16</sub>ClN<sub>3</sub>O<sub>5</sub>S

Molecular Weight: 469.89753

ALogP: 2.815

Rotatable Bonds: 5

Acceptors: 6

Donors: 2

### Model Prediction

Prediction: 0.000779

Unit: g/kg\_body\_weight

Mahalanobis Distance: 11.7

Mahalanobis Distance p-value: 2.5e-008

Mahalanobis Distance: The Mahalanobis distance (MD) is a generalization of the Euclidean distance that accounts for correlations among the X properties. It is calculated as the distance to the center of the training data. The larger the MD, the less trustworthy the prediction.

Mahalanobis Distance p-value: The p-value gives the fraction of training data with an MD greater than or equal to the one for the given sample, assuming normally distributed data. The smaller the p-value, the less trustworthy the prediction. For highly non-normal X properties (e.g., fingerprints), the MD p-value is wildly inaccurate.

### Structural Similar Compounds

| Name                        | OCHRATOXIN     | PENICILLIN VK  | SULFISOOXAZOLE |
|-----------------------------|----------------|----------------|----------------|
| Structure                   |                |                |                |
| Actual Endpoint (-log C)    | 6.28396        | 2.54455        | 2.82494        |
| Predicted Endpoint (-log C) | 5.12358        | 3.9702         | 3.0705         |
| Distance                    | 0.628          | 0.725          | 0.908          |
| Reference                   | NCI/NTP TR-358 | NCI/NTP TR-336 | NCI/NTP TR-138 |

### Model Applicability

Unknown features are fingerprint features in the query molecule, but not found or appearing too infrequently in the training set.

1. Molecular\_Weight out of range. Value: 469.9. Training min, max, mean, SD: 68.074, 434.63, 171.13, 85.06.
2. OPS PC5 out of range. Value: -4.1326. Training min, max, SD, explained variance: -3.4, 4.1587, 1.489, 0.0686.
3. OPS PC10 out of range. Value: 2.8975. Training min, max, SD, explained variance: -3.9696, 2.3971, 0.982, 0.0298.
4. Unknown FCFP\_2 feature: 436915834: [\*]\C=C1/S[\*][\*]C1=[\*]
5. Unknown FCFP\_2 feature: -1986158408: [\*]N1[\*][\*]SC1=O

### Feature Contribution

#### Top features for positive contribution

| Fingerprint | Bit/Smiles | Feature Structure | Score |
|-------------|------------|-------------------|-------|
|             |            |                   |       |

|                                               |                   |                                                                                                                                       |              |
|-----------------------------------------------|-------------------|---------------------------------------------------------------------------------------------------------------------------------------|--------------|
| FCFP_2                                        | 332760439         | 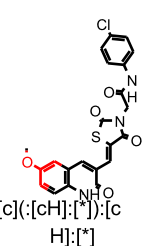<br><chem>[*]O[c](:[cH]:[*]):[cH]:[*]</chem>        | 0.672        |
| FCFP_2                                        | 32                | <br><chem>[*]Cl</chem>                             | 0.526        |
| FCFP_2                                        | 1                 | <br><chem>[*]=O</chem>                             | 0.511        |
| <b>Top Features for negative contribution</b> |                   |                                                                                                                                       |              |
| <b>Fingerprint</b>                            | <b>Bit/Smiles</b> | <b>Feature Structure</b>                                                                                                              | <b>Score</b> |
| FCFP_2                                        | 203677720         | <br><chem>[*][c](:[*]):[c](C=[*]):[cH]:[*]</chem> | -0.406       |
| FCFP_2                                        | 565998553         | <br><chem>[*]N1[*]C(=[*])C1=O</chem>             | -0.348       |

|        |            |                                                                                                                                                                                                                                                                                                                                                                                                                                                                                                    |        |
|--------|------------|----------------------------------------------------------------------------------------------------------------------------------------------------------------------------------------------------------------------------------------------------------------------------------------------------------------------------------------------------------------------------------------------------------------------------------------------------------------------------------------------------|--------|
| FCFP_2 | 1872154524 | 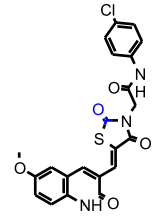 <p>The chemical structure shows a thioamide group (-C(=S)-NH-) attached to a benzimidazole ring system. The benzimidazole ring has a chlorine atom at the 2-position and a hydroxyl group at the 4-position. The thioamide nitrogen is further substituted with a 4-chlorophenyl group. The nitrogen atom in the thioamide group is highlighted in blue.</p> <chem>Oc1ccc2c(c1)nc(c2)C(=S)Nc3ccc(Cl)cc3</chem> | -0.307 |
|--------|------------|----------------------------------------------------------------------------------------------------------------------------------------------------------------------------------------------------------------------------------------------------------------------------------------------------------------------------------------------------------------------------------------------------------------------------------------------------------------------------------------------------|--------|

[\*]C(=O)[\*]

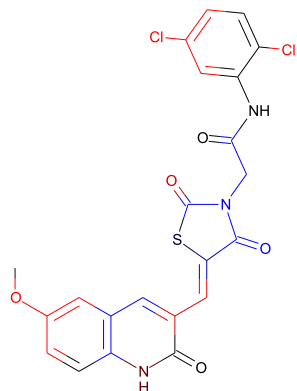

$C_{22}H_{15}Cl_2N_3O_5S$

Molecular Weight: 504.3426

ALogP: 3.479

Rotatable Bonds: 5

Acceptors: 6

Donors: 2

### Model Prediction

Prediction: 0.00054

Unit: g/kg\_body\_weight

Mahalanobis Distance: 12

Mahalanobis Distance p-value: 1.01e-008

Mahalanobis Distance: The Mahalanobis distance (MD) is a generalization of the Euclidean distance that accounts for correlations among the X properties. It is calculated as the distance to the center of the training data. The larger the MD, the less trustworthy the prediction.

Mahalanobis Distance p-value: The p-value gives the fraction of training data with an MD greater than or equal to the one for the given sample, assuming normally distributed data. The smaller the p-value, the less trustworthy the prediction. For highly non-normal X properties (e.g., fingerprints), the MD p-value is wildly inaccurate.

### Structural Similar Compounds

| Name                        | OCHRATOXIN     | PENICILLIN VK  | SULFISOOXAZOLE |
|-----------------------------|----------------|----------------|----------------|
| Structure                   |                |                |                |
| Actual Endpoint (-log C)    | 6.28396        | 2.54455        | 2.82494        |
| Predicted Endpoint (-log C) | 5.12358        | 3.9702         | 3.0705         |
| Distance                    | 0.667          | 0.808          | 0.994          |
| Reference                   | NCI/NTP TR-358 | NCI/NTP TR-336 | NCI/NTP TR-138 |

### Model Applicability

Unknown features are fingerprint features in the query molecule, but not found or appearing too infrequently in the training set.

1. Molecular\_Weight out of range. Value: 504.34. Training min, max, mean, SD: 68.074, 434.63, 171.13, 85.06.
2. OPS PC5 out of range. Value: -4.1507. Training min, max, SD, explained variance: -3.4, 4.1587, 1.489, 0.0686.
3. OPS PC10 out of range. Value: 2.77. Training min, max, SD, explained variance: -3.9696, 2.3971, 0.982, 0.0298.
4. Unknown FCFP\_2 feature: 436915834: [\*]\C=C\1/S[\*][\*]C1=[\*]
5. Unknown FCFP\_2 feature: -1986158408: [\*]N1[\*][\*]SC1=O

### Feature Contribution

#### Top features for positive contribution

| Fingerprint | Bit/Smiles | Feature Structure | Score |
|-------------|------------|-------------------|-------|
|             |            |                   |       |

|                                               |                   |                                                                                                                                        |              |
|-----------------------------------------------|-------------------|----------------------------------------------------------------------------------------------------------------------------------------|--------------|
| FCFP_2                                        | 332760439         | 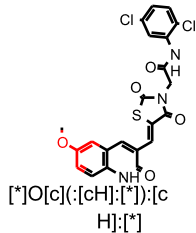<br><chem>[*]O[c](:[cH]:[*]):[cH]:[*]</chem>        | 0.672        |
| FCFP_2                                        | 32                | <br><chem>[*]Cl</chem>                              | 0.526        |
| FCFP_2                                        | 1                 | <br><chem>[*]=O</chem>                              | 0.511        |
| <b>Top Features for negative contribution</b> |                   |                                                                                                                                        |              |
| <b>Fingerprint</b>                            | <b>Bit/Smiles</b> | <b>Feature Structure</b>                                                                                                               | <b>Score</b> |
| FCFP_2                                        | 203677720         | <br><chem>[*][c](:[*]):[c](C=[*]):[cH]:[*]</chem> | -0.406       |
| FCFP_2                                        | 565998553         | <br><chem>[*]N1[*]C(=[*])C1=O</chem>              | -0.348       |

|        |            |                                                                                                                                                                                                                                                                                                                                                                                                                                                                                                                                                            |        |
|--------|------------|------------------------------------------------------------------------------------------------------------------------------------------------------------------------------------------------------------------------------------------------------------------------------------------------------------------------------------------------------------------------------------------------------------------------------------------------------------------------------------------------------------------------------------------------------------|--------|
| FCFP_2 | 1872154524 | 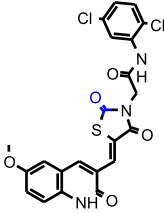 <p>The chemical structure shows a benzimidazole ring system. One of the imidazole nitrogens is substituted with a thioamide group (-NH-C(=S)-). The other imidazole nitrogen is substituted with a dichlorophenyl group (-C<sub>6</sub>H<sub>3</sub>Cl<sub>2</sub>). The benzimidazole ring also has a methoxy group (-OCH<sub>3</sub>) and a hydrogen atom on the benzene ring. The thioamide group is further substituted with a methyl group (-CH<sub>3</sub>).</p> | -0.307 |
|--------|------------|------------------------------------------------------------------------------------------------------------------------------------------------------------------------------------------------------------------------------------------------------------------------------------------------------------------------------------------------------------------------------------------------------------------------------------------------------------------------------------------------------------------------------------------------------------|--------|

[\*]C(=O)[\*]



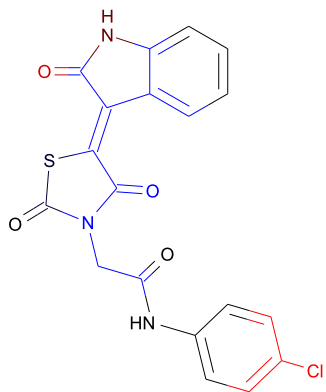

$C_{19}H_{12}ClN_3O_4S$

Molecular Weight: 413.83428

ALogP: 2.363

Rotatable Bonds: 3

Acceptors: 5

Donors: 2

### Model Prediction

Prediction: 0.0146

Unit: g/kg\_body\_weight

Mahalanobis Distance: 8.45

Mahalanobis Distance p-value: 0.000601

Mahalanobis Distance: The Mahalanobis distance (MD) is a generalization of the Euclidean distance that accounts for correlations among the X properties. It is calculated as the distance to the center of the training data. The larger the MD, the less trustworthy the prediction.

Mahalanobis Distance p-value: The p-value gives the fraction of training data with an MD greater than or equal to the one for the given sample, assuming normally distributed data. The smaller the p-value, the less trustworthy the prediction. For highly non-normal X properties (e.g., fingerprints), the MD p-value is wildly inaccurate.

### Structural Similar Compounds

| Name                        | OCHRATOXIN     | PENICILLIN VK  | SULFISOOXAZOLE |
|-----------------------------|----------------|----------------|----------------|
| Structure                   |                |                |                |
| Actual Endpoint (-log C)    | 6.28396        | 2.54455        | 2.82494        |
| Predicted Endpoint (-log C) | 5.12358        | 3.9702         | 3.0705         |
| Distance                    | 0.624          | 0.691          | 0.703          |
| Reference                   | NCI/NTP TR-358 | NCI/NTP TR-336 | NCI/NTP TR-138 |

### Model Applicability

Unknown features are fingerprint features in the query molecule, but not found or appearing too infrequently in the training set.

1. OPS PC5 out of range. Value: -3.9678. Training min, max, SD, explained variance: -3.4, 4.1587, 1.489, 0.0686.
2. OPS PC10 out of range. Value: 2.9633. Training min, max, SD, explained variance: -3.9696, 2.3971, 0.982, 0.0298.
3. Unknown FCFP\_2 feature: -1678275541: [\*]C(=C1C(=[\*])[\*][\*]:[c]1:[\*])[\*]
4. Unknown FCFP\_2 feature: 436915834: [\*]C=C1/S[\*][\*]C1=[\*]
5. Unknown FCFP\_2 feature: -1986158408: [\*]N1[\*][\*]SC1=O

### Feature Contribution

#### Top features for positive contribution

| Fingerprint | Bit/Smiles | Feature Structure | Score |
|-------------|------------|-------------------|-------|
| FCFP_2      | 32         | <br>[*]Cl         | 0.526 |

|                                               |                   |                                                                                                                             |              |
|-----------------------------------------------|-------------------|-----------------------------------------------------------------------------------------------------------------------------|--------------|
| FCFP_2                                        | 1                 | 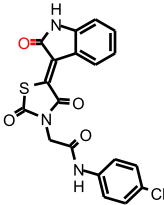<br>[*]=O                                | 0.511        |
| FCFP_2                                        | 367998008         | <br>[*]:[cH]:[c](Cl):[cH]<br>:[*]        | 0.413        |
| <b>Top Features for negative contribution</b> |                   |                                                                                                                             |              |
| <b>Fingerprint</b>                            | <b>Bit/Smiles</b> | <b>Feature Structure</b>                                                                                                    | <b>Score</b> |
| FCFP_2                                        | 203677720         | <br>[*][c](:[*]):[c](C=[*]<br>):[cH]:[*] | -0.406       |
| FCFP_2                                        | 565998553         | <br>[*]N1[*]C(=[*])C1=O                | -0.348       |
| FCFP_2                                        | 1872154524        | <br>[*]C(=O)[*]                        | -0.307       |



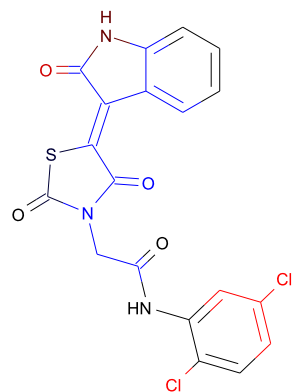

$C_{19}H_{11}Cl_2N_3O_4S$

Molecular Weight: 448.27933

ALogP: 3.028

Rotatable Bonds: 3

Acceptors: 5

Donors: 2

### Model Prediction

Prediction: 0.0102

Unit: g/kg\_body\_weight

Mahalanobis Distance: 8.86

Mahalanobis Distance p-value: 0.000184

Mahalanobis Distance: The Mahalanobis distance (MD) is a generalization of the Euclidean distance that accounts for correlations among the X properties. It is calculated as the distance to the center of the training data. The larger the MD, the less trustworthy the prediction.

Mahalanobis Distance p-value: The p-value gives the fraction of training data with an MD greater than or equal to the one for the given sample, assuming normally distributed data. The smaller the p-value, the less trustworthy the prediction. For highly non-normal X properties (e.g., fingerprints), the MD p-value is wildly inaccurate.

### Structural Similar Compounds

| Name                        | OCHRATOXIN     | PENICILLIN VK  | SULFISOOXAZOLE |
|-----------------------------|----------------|----------------|----------------|
| Structure                   |                |                |                |
| Actual Endpoint (-log C)    | 6.28396        | 2.54455        | 2.82494        |
| Predicted Endpoint (-log C) | 5.12358        | 3.9702         | 3.0705         |
| Distance                    | 0.622          | 0.756          | 0.795          |
| Reference                   | NCI/NTP TR-358 | NCI/NTP TR-336 | NCI/NTP TR-138 |

### Model Applicability

Unknown features are fingerprint features in the query molecule, but not found or appearing too infrequently in the training set.

1. Molecular\_Weight out of range. Value: 448.28. Training min, max, mean, SD: 68.074, 434.63, 171.13, 85.06.
2. OPS PC5 out of range. Value: -3.9859. Training min, max, SD, explained variance: -3.4, 4.1587, 1.489, 0.0686.
3. OPS PC10 out of range. Value: 2.8356. Training min, max, SD, explained variance: -3.9696, 2.3971, 0.982, 0.0298.
4. Unknown FCFP\_2 feature: -1678275541: [\*]C(=C1C(=[\*])[\*][\*]:[c]1:[\*])[\*]
5. Unknown FCFP\_2 feature: 436915834: [\*]C=C\1/S[\*][\*]C1=[\*]
6. Unknown FCFP\_2 feature: -1986158408: [\*]N1[\*][\*]SC1=O

### Feature Contribution

#### Top features for positive contribution

| Fingerprint | Bit/Smiles | Feature Structure | Score |
|-------------|------------|-------------------|-------|
|             |            |                   |       |

|                                               |                   |                                                                                                                               |              |
|-----------------------------------------------|-------------------|-------------------------------------------------------------------------------------------------------------------------------|--------------|
| FCFP_2                                        | 32                | 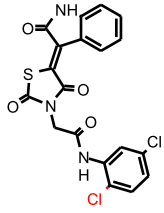<br>[*]Cl                                  | 0.526        |
| FCFP_2                                        | 1                 | <br>[*]=O                                  | 0.511        |
| FCFP_2                                        | 367998008         | <br>[*]:[cH]:[c](Cl):[cH]<br>:[*]          | 0.413        |
| <b>Top Features for negative contribution</b> |                   |                                                                                                                               |              |
| <b>Fingerprint</b>                            | <b>Bit/Smiles</b> | <b>Feature Structure</b>                                                                                                      | <b>Score</b> |
| FCFP_2                                        | 203677720         | <br>[*][c](:[*]):[c](C=[*]<br>):[cH]:[*] | -0.406       |
| FCFP_2                                        | 565998553         | <br>[*]N1[*]C(=O)C1=O                    | -0.348       |

|        |            |                                                                                                                                                                                                                                                                                                                                                                                                                                                                                                                                                                                               |        |
|--------|------------|-----------------------------------------------------------------------------------------------------------------------------------------------------------------------------------------------------------------------------------------------------------------------------------------------------------------------------------------------------------------------------------------------------------------------------------------------------------------------------------------------------------------------------------------------------------------------------------------------|--------|
| FCFP_2 | 1872154524 | 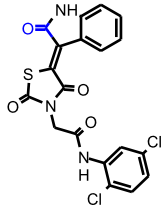 <p>The chemical structure shows a central carbon atom double-bonded to a sulfur atom (S) and single-bonded to a nitrogen atom (NH) which is part of a benzamide group. The central carbon is also single-bonded to a nitrogen atom (N) which is part of a thioamide group (C=S). This nitrogen is further bonded to a methylene group (-CH2-), which is connected to another nitrogen atom (NH) that is part of a 2,4-dichlorophenyl group. The sulfur atom is also bonded to a carbonyl group (C=O).</p> | -0.307 |
|--------|------------|-----------------------------------------------------------------------------------------------------------------------------------------------------------------------------------------------------------------------------------------------------------------------------------------------------------------------------------------------------------------------------------------------------------------------------------------------------------------------------------------------------------------------------------------------------------------------------------------------|--------|

[\*]C(=O)[\*]

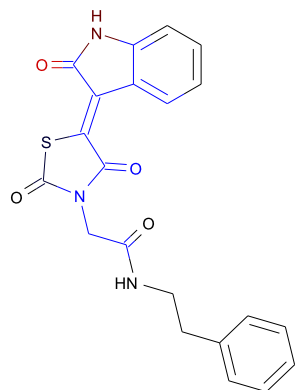

$C_{21}H_{17}N_3O_4S$

Molecular Weight: 407.44237

ALogP: 2.027

Rotatable Bonds: 5

Acceptors: 5

Donors: 2

### Model Prediction

Prediction: 0.33

Unit: g/kg\_body\_weight

Mahalanobis Distance: 7.34

Mahalanobis Distance p-value: 0.0112

Mahalanobis Distance: The Mahalanobis distance (MD) is a generalization of the Euclidean distance that accounts for correlations among the X properties. It is calculated as the distance to the center of the training data. The larger the MD, the less trustworthy the prediction.

Mahalanobis Distance p-value: The p-value gives the fraction of training data with an MD greater than or equal to the one for the given sample, assuming normally distributed data. The smaller the p-value, the less trustworthy the prediction. For highly non-normal X properties (e.g., fingerprints), the MD p-value is wildly inaccurate.

### Structural Similar Compounds

| Name                        | PENICILLIN VK  | OCHRATOXIN     | SULFISOOXAZOLE |
|-----------------------------|----------------|----------------|----------------|
| Structure                   |                |                |                |
| Actual Endpoint (-log C)    | 2.54455        | 6.28396        | 2.82494        |
| Predicted Endpoint (-log C) | 3.9702         | 5.12358        | 3.0705         |
| Distance                    | 0.626          | 0.630          | 0.700          |
| Reference                   | NCI/NTP TR-336 | NCI/NTP TR-358 | NCI/NTP TR-138 |

### Model Applicability

Unknown features are fingerprint features in the query molecule, but not found or appearing too infrequently in the training set.

1. All properties and OPS components are within expected ranges.
2. Unknown FCFP\_2 feature: -1678275541: [\*]C(=C1C(=[\*])[\*]:[c]1:[\*])[\*]
3. Unknown FCFP\_2 feature: 436915834: [\*]C=C1/S[\*][\*]C1=[\*]
4. Unknown FCFP\_2 feature: -1986158408: [\*]N1[\*][\*]SC1=O

### Feature Contribution

#### Top features for positive contribution

| Fingerprint | Bit/Smiles | Feature Structure | Score |
|-------------|------------|-------------------|-------|
| FCFP_2      | 1          |                   | 0.511 |

|                                               |                   |                                                                                                                         |              |
|-----------------------------------------------|-------------------|-------------------------------------------------------------------------------------------------------------------------|--------------|
| FCFP_2                                        | 3                 | 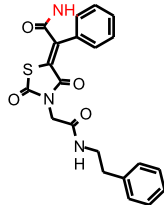<br>[*]N[*]                          | 0.104        |
| <b>Top Features for negative contribution</b> |                   |                                                                                                                         |              |
| <b>Fingerprint</b>                            | <b>Bit/Smiles</b> | <b>Feature Structure</b>                                                                                                | <b>Score</b> |
| FCFP_2                                        | 203677720         | <br>[*][c](:[*]):[c](C=[*]):[cH]:[*] | -0.406       |
| FCFP_2                                        | 565998553         | <br>[*]N1[*]C(=[*])C1=O              | -0.348       |
| FCFP_2                                        | 1872154524        | <br>[*]C(=O)[*]                    | -0.307       |



# Sorafenib

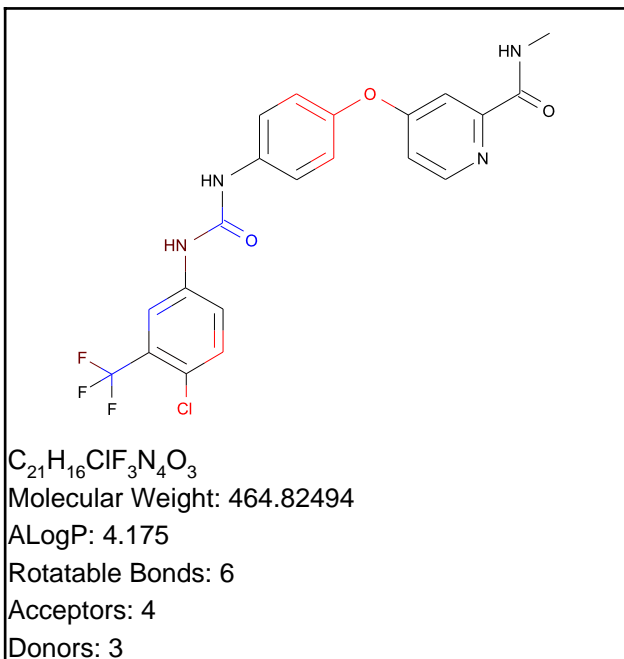

## Model Prediction

Prediction: 0.000918

Unit: g/kg\_body\_weight

Mahalanobis Distance: 12.2

Mahalanobis Distance p-value: 4.69e-009

Mahalanobis Distance: The Mahalanobis distance (MD) is a generalization of the Euclidean distance that accounts for correlations among the X properties. It is calculated as the distance to the center of the training data. The larger the MD, the less trustworthy the prediction.

Mahalanobis Distance p-value: The p-value gives the fraction of training data with an MD greater than or equal to the one for the given sample, assuming normally distributed data. The smaller the p-value, the less trustworthy the prediction. For highly non-normal X properties (e.g., fingerprints), the MD p-value is wildly inaccurate.

# TOPKAT\_Rat\_Maximum\_Tolerated\_Dose\_Gavage

## Structural Similar Compounds

| Name                        | OCHRATOXIN                                                                          | SULFISOOXAZOLE                                                                      | PENICILLIN VK                                                                       |
|-----------------------------|-------------------------------------------------------------------------------------|-------------------------------------------------------------------------------------|-------------------------------------------------------------------------------------|
| Structure                   | 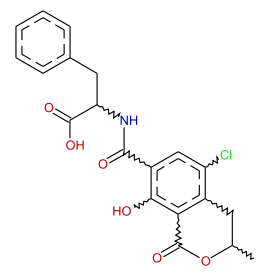 |  |  |
| Actual Endpoint (-log C)    | 6.28396                                                                             | 2.82494                                                                             | 2.54455                                                                             |
| Predicted Endpoint (-log C) | 5.12358                                                                             | 3.0705                                                                              | 3.9702                                                                              |
| Distance                    | 0.758                                                                               | 0.997                                                                               | 1.159                                                                               |
| Reference                   | NCI/NTP TR-358                                                                      | NCI/NTP TR-138                                                                      | NCI/NTP TR-336                                                                      |

## Model Applicability

Unknown features are fingerprint features in the query molecule, but not found or appearing too infrequently in the training set.

1. Molecular\_Weight out of range. Value: 464.82. Training min, max, mean, SD: 68.074, 434.63, 171.13, 85.06.
2. Num\_AromaticRings out of range. Value: 3. Training min, max, mean, SD: 0, 2, 0.5625, 0.693.
3. OPS\_PC5 out of range. Value: -3.5737. Training min, max, SD, explained variance: -3.4, 4.1587, 1.489, 0.0686.
4. OPS\_PC7 out of range. Value: -3.8342. Training min, max, SD, explained variance: -2.8003, 2.9332, 1.16, 0.0416.
5. Unknown FCFP\_2 feature: 1499521844: [\*]NC(=O)N[\*]
6. Unknown FCFP\_2 feature: -1029533685: [\*]:[c](:[\*])C(F)(F)F
7. Unknown FCFP\_2 feature: 136686699: [\*]NC

## Feature Contribution

### Top features for positive contribution

| Fingerprint | Bit/Smiles | Feature Structure | Score |
|-------------|------------|-------------------|-------|
|             |            |                   |       |

|                                               |                   |                                                                                                                                        |              |
|-----------------------------------------------|-------------------|----------------------------------------------------------------------------------------------------------------------------------------|--------------|
| FCFP_2                                        | 332760439         | 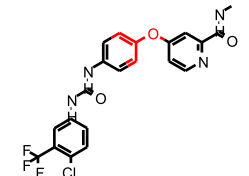<br><chem>[*]O[c](:[cH]:[*]);[cH]:[*]</chem>        | 0.672        |
| FCFP_2                                        | 32                | <br><chem>[*]Cl</chem>                              | 0.526        |
| FCFP_2                                        | 1                 | <br><chem>[*]=O</chem>                              | 0.511        |
| <b>Top Features for negative contribution</b> |                   |                                                                                                                                        |              |
| <b>Fingerprint</b>                            | <b>Bit/Smiles</b> | <b>Feature Structure</b>                                                                                                               | <b>Score</b> |
| FCFP_2                                        | 203677720         | <br><chem>[*][c](:[*]);[c](C=[*]):[cH]:[*]</chem> | -0.406       |
| FCFP_2                                        | 1872154524        | <br><chem>[*]C(=O)[*]</chem>                      | -0.307       |

FCFP\_2

0

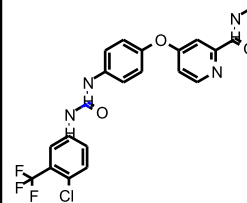

[\*]C=[\*]

0.29

# Sunitinib

# TOPKAT\_Rat\_Maximum\_Tolerated\_Dose\_Gavage

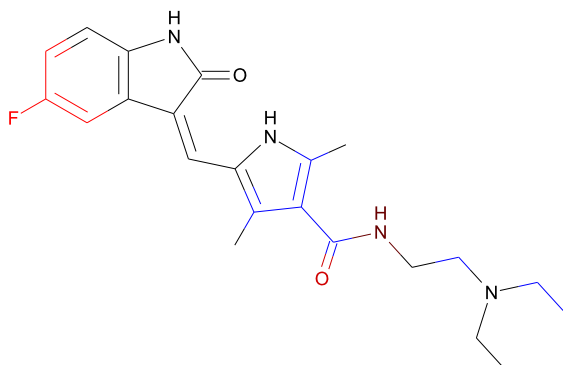

$C_{22}H_{27}FN_4O_2$

Molecular Weight: 398.47378

ALogP: 2.997

Rotatable Bonds: 7

Acceptors: 3

Donors: 3

## Model Prediction

Prediction: 0.161

Unit: g/kg\_body\_weight

Mahalanobis Distance: 9.68

Mahalanobis Distance p-value: 1.53e-005

Mahalanobis Distance: The Mahalanobis distance (MD) is a generalization of the Euclidean distance that accounts for correlations among the X properties. It is calculated as the distance to the center of the training data. The larger the MD, the less trustworthy the prediction.

Mahalanobis Distance p-value: The p-value gives the fraction of training data with an MD greater than or equal to the one for the given sample, assuming normally distributed data. The smaller the p-value, the less trustworthy the prediction. For highly non-normal X properties (e.g., fingerprints), the MD p-value is wildly inaccurate.

## Structural Similar Compounds

| Name                        | OCHRATOXIN                                                                          | SULFISOOXAZOLE                                                                      | PROBENECID                                                                          |
|-----------------------------|-------------------------------------------------------------------------------------|-------------------------------------------------------------------------------------|-------------------------------------------------------------------------------------|
| Structure                   | 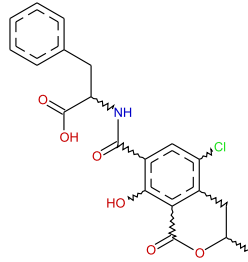 |  |  |
| Actual Endpoint (-log C)    | 6.28396                                                                             | 2.82494                                                                             | 2.85333                                                                             |
| Predicted Endpoint (-log C) | 5.12358                                                                             | 3.0705                                                                              | 2.4258                                                                              |
| Distance                    | 0.784                                                                               | 0.908                                                                               | 0.912                                                                               |
| Reference                   | NCI/NTP TR-358                                                                      | NCI/NTP TR-138                                                                      | NCI/NTP TR-395                                                                      |

## Model Applicability

Unknown features are fingerprint features in the query molecule, but not found or appearing too infrequently in the training set.

1. OPS PC7 out of range. Value: -3.6239. Training min, max, SD, explained variance: -2.8003, 2.9332, 1.16, 0.0416.
2. Unknown FCFP\_2 feature: 19: [\*]:[nH]:[\*]
3. Unknown FCFP\_2 feature: 2005402822: [\*][c]1:[\*]:[\*]:[c]([\*]):[nH]:1
4. Unknown FCFP\_2 feature: 203707511: [\*][c]1:[\*]:[\*]:[nH]:[c]:1C=[\*]
5. Unknown FCFP\_2 feature: -1678275541: [\*]C(=C1C(=[\*])[\*]:[c]1:[\*])[\*]

## Feature Contribution

### Top features for positive contribution

| Fingerprint | Bit/Smiles | Feature Structure                                                                              | Score |
|-------------|------------|------------------------------------------------------------------------------------------------|-------|
| FCFP_2      | 32         | 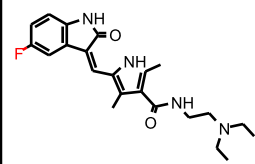<br>[*]Cl | 0.526 |

|                                               |                   |                                                                                                                               |              |
|-----------------------------------------------|-------------------|-------------------------------------------------------------------------------------------------------------------------------|--------------|
| FCFP_2                                        | 1                 | 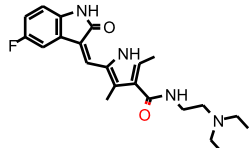<br>[*]=O                                  | 0.511        |
| FCFP_2                                        | 367998008         | <br>[*]:[cH]:[c](Cl):[cH]<br>:[*]          | 0.413        |
| <b>Top Features for negative contribution</b> |                   |                                                                                                                               |              |
| <b>Fingerprint</b>                            | <b>Bit/Smiles</b> | <b>Feature Structure</b>                                                                                                      | <b>Score</b> |
| FCFP_2                                        | 136597326         | <br>[*]CC                                  | -0.489       |
| FCFP_2                                        | 203677720         | <br>[*][c](:[*]):[c](C=[*]<br>):[cH]:[*] | -0.406       |
| FCFP_2                                        | 1872154524        | <br>[*]C(=O)[*]                          | -0.307       |



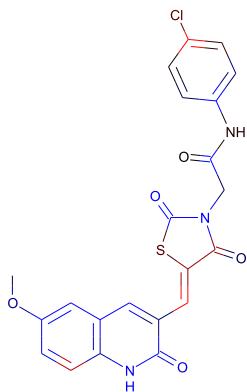

$C_{22}H_{16}ClN_3O_5S$

Molecular Weight: 469.89753

ALogP: 2.815

Rotatable Bonds: 5

Acceptors: 6

Donors: 2

### Model Prediction

Prediction: 0.936

Unit: g/kg\_body\_weight

Mahalanobis Distance: 24.1

Mahalanobis Distance p-value: 4.69e-026

Mahalanobis Distance: The Mahalanobis distance (MD) is a generalization of the Euclidean distance that accounts for correlations among the X properties. It is calculated as the distance to the center of the training data. The larger the MD, the less trustworthy the prediction.

Mahalanobis Distance p-value: The p-value gives the fraction of training data with an MD greater than or equal to the one for the given sample, assuming normally distributed data. The smaller the p-value, the less trustworthy the prediction. For highly non-normal X properties (e.g., fingerprints), the MD p-value is wildly inaccurate.

### Structural Similar Compounds

| Name                        | PIRETANIDE      | ETHYL-bis-COUMACETATE | OCHRATOXIN A    |
|-----------------------------|-----------------|-----------------------|-----------------|
| Structure                   |                 |                       |                 |
| Actual Endpoint (-log C)    | 1.811           | 2.687                 | 4.305           |
| Predicted Endpoint (-log C) | 1.83976         | 2.7054                | 3.03558         |
| Distance                    | 0.600           | 0.612                 | 0.614           |
| Reference                   | DRFUD4 2;393;77 | FEPRA7 10;303;51      | FCTXAV 6;479;68 |

### Model Applicability

Unknown features are fingerprint features in the query molecule, but not found or appearing too infrequently in the training set.

1. OPS PC58 out of range. Value: -4.1027. Training min, max, SD, explained variance: -4.0974, 5.4085, 1.034, 0.0039.
2. Unknown ECFP\_2 feature: 2131425032: [\*]\C=C(\C=[\*])/C(=[\*])[\*]
3. Unknown ECFP\_2 feature: 1000552169: [\*]\C=C\1/S[\*][\*]C1=[\*]
4. Unknown FCFP\_6 feature: 16: [\*]:[cH]:[\*]
5. Unknown FCFP\_6 feature: 71476542: [\*]:[c](:[\*])Cl
6. Unknown FCFP\_6 feature: 1618154665: [\*][c](:[\*]):[cH]:[cH]:[\*]
7. Unknown FCFP\_6 feature: 451371068: [\*]C(=C[c](:[\*]):[\*])[\*]

### Feature Contribution

#### Top features for positive contribution

| Fingerprint | Bit/Smiles | Feature Structure | Score |
|-------------|------------|-------------------|-------|
|             |            |                   |       |

| ECFP_6                                 | 642810091   | 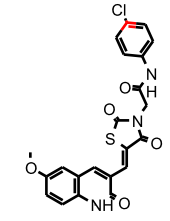<br>[*][c](:[*]):[*]         | 0.281  |
|----------------------------------------|-------------|-----------------------------------------------------------------------------------------------------------------|--------|
| ECFP_6                                 | -1897341097 | <br>[*]N[*]                  | 0.216  |
| FCFP_6                                 | 436915834   | <br>[*]C=C1/S[*][*]C1=<br>'] | 0.184  |
| Top Features for negative contribution |             |                                                                                                                 |        |
| Fingerprint                            | Bit/Smiles  | Feature Structure                                                                                               | Score  |
| ECFP_6                                 | 2106656448  | <br>[*]C(=O)[*]             | -0.352 |
| ECFP_6                                 | -817402818  | <br>[*]Cl                  | -0.263 |



|        |           |                                                                                                                        |       |
|--------|-----------|------------------------------------------------------------------------------------------------------------------------|-------|
| ECFP_6 | 176455838 | 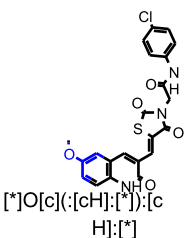<br>[*]O[c](:[cH]:[*]):[c<br>H]:[*] | 0.257 |
|--------|-----------|------------------------------------------------------------------------------------------------------------------------|-------|

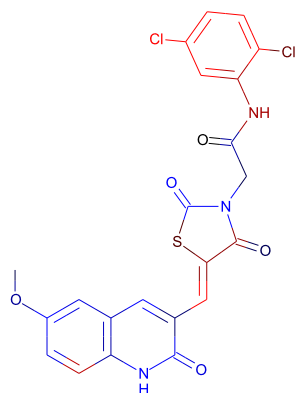

$C_{22}H_{15}Cl_2N_3O_5S$

Molecular Weight: 504.3426

ALogP: 3.479

Rotatable Bonds: 5

Acceptors: 6

Donors: 2

### Model Prediction

Prediction: 0.316

Unit: g/kg\_body\_weight

Mahalanobis Distance: 24.1

Mahalanobis Distance p-value: 3.74e-026

Mahalanobis Distance: The Mahalanobis distance (MD) is a generalization of the Euclidean distance that accounts for correlations among the X properties. It is calculated as the distance to the center of the training data. The larger the MD, the less trustworthy the prediction.

Mahalanobis Distance p-value: The p-value gives the fraction of training data with an MD greater than or equal to the one for the given sample, assuming normally distributed data. The smaller the p-value, the less trustworthy the prediction. For highly non-normal X properties (e.g., fingerprints), the MD p-value is wildly inaccurate.

### Structural Similar Compounds

| Name                        | OCHRATOXIN A    | BROMOFENOXIME   | ETHYL-bis-COUMACETATE |
|-----------------------------|-----------------|-----------------|-----------------------|
| Structure                   |                 |                 |                       |
| Actual Endpoint (-log C)    | 4.305           | 2.622           | 2.687                 |
| Predicted Endpoint (-log C) | 3.03558         | 3.41798         | 2.7054                |
| Distance                    | 0.647           | 0.662           | 0.666                 |
| Reference                   | FCTXAV 6;479;68 | 85ARAE 2;203;77 | FEPRA7 10;303;51      |

### Model Applicability

Unknown features are fingerprint features in the query molecule, but not found or appearing too infrequently in the training set.

1. OPS PC58 out of range. Value: -4.1222. Training min, max, SD, explained variance: -4.0974, 5.4085, 1.034, 0.0039.
2. Unknown ECFP\_2 feature: 2131425032: [\*]\C=C(\C=[\*])/C(=[\*])[\*]
3. Unknown ECFP\_2 feature: 1000552169: [\*]\C=C\1/S[\*][\*]C1=[\*]
4. Unknown FCFP\_6 feature: 16: [\*]:[cH]:[\*]
5. Unknown FCFP\_6 feature: 71476542: [\*]:[c](:[\*])Cl
6. Unknown FCFP\_6 feature: 1618154665: [\*][c](:[\*]):[cH]:[cH]:[\*]
7. Unknown FCFP\_6 feature: 451371068: [\*]C(=C[c](:[\*]):[\*])[\*]

### Feature Contribution

#### Top features for positive contribution

| Fingerprint | Bit/Smiles | Feature Structure | Score |
|-------------|------------|-------------------|-------|
|             |            |                   |       |

| ECFP_6                                 | 642810091   | 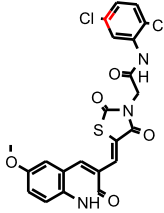<br>[*][c]:[*]:[*]                          | 0.281  |
|----------------------------------------|-------------|--------------------------------------------------------------------------------------------------------------------------------|--------|
| ECFP_6                                 | -1897341097 | <br>[*]N[*]                                 | 0.216  |
| ECFP_6                                 | 577592657   | <br>[*][c]1:[*]:[cH]:[cH]<br>:c](Cl):[cH]:1 | 0.194  |
| Top Features for negative contribution |             |                                                                                                                                |        |
| Fingerprint                            | Bit/Smiles  | Feature Structure                                                                                                              | Score  |
| ECFP_6                                 | 2106656448  | <br>[*]C(=O)[*]                            | -0.352 |
| ECFP_6                                 | -817402818  | <br>[*]Cl                                 | -0.263 |

|        |            |                                                                                                                        |        |
|--------|------------|------------------------------------------------------------------------------------------------------------------------|--------|
| ECFP_6 | -176455838 | 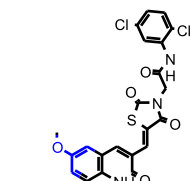<br>[*]O[c](:[cH]:[*]);[c<br>H]:[*] | -0.257 |
|--------|------------|------------------------------------------------------------------------------------------------------------------------|--------|

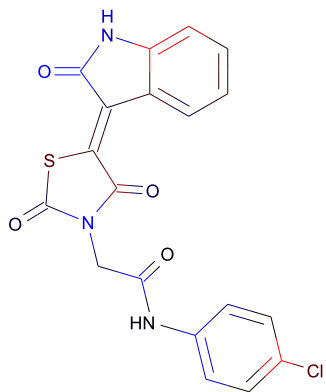

$C_{19}H_{12}ClN_3O_4S$

Molecular Weight: 413.83428

ALogP: 2.363

Rotatable Bonds: 3

Acceptors: 5

Donors: 2

### Model Prediction

Prediction: 1.67

Unit: g/kg\_body\_weight

Mahalanobis Distance: 21.3

Mahalanobis Distance p-value: 2.24e-013

Mahalanobis Distance: The Mahalanobis distance (MD) is a generalization of the Euclidean distance that accounts for correlations among the X properties. It is calculated as the distance to the center of the training data. The larger the MD, the less trustworthy the prediction.

Mahalanobis Distance p-value: The p-value gives the fraction of training data with an MD greater than or equal to the one for the given sample, assuming normally distributed data. The smaller the p-value, the less trustworthy the prediction. For highly non-normal X properties (e.g., fingerprints), the MD p-value is wildly inaccurate.

### Structural Similar Compounds

| Name                        | PIRETANIDE      | 1H-1,4-BENZODIAZEPINE-1-CARBOXAMIDE; 2,3-DIHYDRO-N-METHYL-7-NITRO-2-OXO-5-PHENYL- | PIROXICAM         |
|-----------------------------|-----------------|-----------------------------------------------------------------------------------|-------------------|
| Structure                   |                 |                                                                                   |                   |
| Actual Endpoint (-log C)    | 1.811           | 2.171                                                                             | 3.186             |
| Predicted Endpoint (-log C) | 1.83976         | 2.64752                                                                           | 2.63418           |
| Distance                    | 0.568           | 0.610                                                                             | 0.623             |
| Reference                   | DRFUD4 2;393;77 | TAKHAA 29;153;70                                                                  | ARZNAD 28;1714;78 |

### Model Applicability

Unknown features are fingerprint features in the query molecule, but not found or appearing too infrequently in the training set.

1. All properties and OPS components are within expected ranges.
2. Unknown FCFP\_6 feature: 16: [\*]:[cH]:[\*]
3. Unknown FCFP\_6 feature: 1618154665: [\*][c](:[\*]):[cH]:[cH]:[\*]
4. Unknown FCFP\_6 feature: -1678275541: [\*]C(=C1C(=[\*])[\*][\*]:[c]1:[\*])[\*]
5. Unknown FCFP\_6 feature: 71476542: [\*]:[c](:[\*])Cl

### Feature Contribution

#### Top features for positive contribution

| Fingerprint | Bit/Smiles | Feature Structure | Score |
|-------------|------------|-------------------|-------|
|             |            |                   |       |

| ECFP_6                                 | 642810091   | 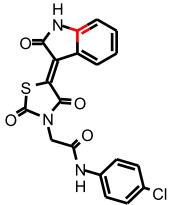<br>[*][c](:[*]):[*]       | 0.281  |
|----------------------------------------|-------------|---------------------------------------------------------------------------------------------------------------|--------|
| ECFP_6                                 | -1897341097 | <br>[*]N[*]                | 0.216  |
| FCFP_6                                 | 436915834   | <br>[*]C=C1/S[*]C1=[<br>'] | 0.184  |
| Top Features for negative contribution |             |                                                                                                               |        |
| Fingerprint                            | Bit/Smiles  | Feature Structure                                                                                             | Score  |
| ECFP_6                                 | 2106656448  | <br>[*]C(=O)[*]           | -0.352 |
| ECFP_6                                 | -817402818  | <br>[*]Cl                | -0.263 |

|        |           |                                                                                                                                                                                                                                                                                                                                                                                                                                                                                                                                                                       |        |
|--------|-----------|-----------------------------------------------------------------------------------------------------------------------------------------------------------------------------------------------------------------------------------------------------------------------------------------------------------------------------------------------------------------------------------------------------------------------------------------------------------------------------------------------------------------------------------------------------------------------|--------|
| FCFP_6 | 566058135 | 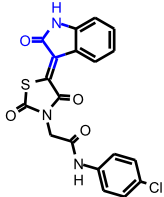 <p>The chemical structure shows a thiazolidine ring system. The nitrogen atom at the top of the ring is highlighted in blue. A carbonyl group is attached to the carbon atom adjacent to the blue nitrogen. The sulfur atom is at the bottom of the ring. A methylene group (-CH2-) is attached to the carbon atom at the right side of the ring, which is further connected to a secondary amine group (-NH-). This secondary amine is attached to a para-chlorophenyl ring.</p> | -0.216 |
|--------|-----------|-----------------------------------------------------------------------------------------------------------------------------------------------------------------------------------------------------------------------------------------------------------------------------------------------------------------------------------------------------------------------------------------------------------------------------------------------------------------------------------------------------------------------------------------------------------------------|--------|

[\*]NC(=O)C(=[\*])[\*]

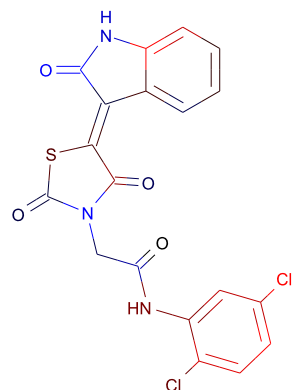

$C_{19}H_{11}Cl_2N_3O_4S$

Molecular Weight: 448.27933

ALogP: 3.028

Rotatable Bonds: 3

Acceptors: 5

Donors: 2

### Model Prediction

Prediction: 0.707

Unit: g/kg\_body\_weight

Mahalanobis Distance: 21.3

Mahalanobis Distance p-value: 2.05e-013

Mahalanobis Distance: The Mahalanobis distance (MD) is a generalization of the Euclidean distance that accounts for correlations among the X properties. It is calculated as the distance to the center of the training data. The larger the MD, the less trustworthy the prediction.

Mahalanobis Distance p-value: The p-value gives the fraction of training data with an MD greater than or equal to the one for the given sample, assuming normally distributed data. The smaller the p-value, the less trustworthy the prediction. For highly non-normal X properties (e.g., fingerprints), the MD p-value is wildly inaccurate.

### Structural Similar Compounds

| Name                        | PIRETANIDE      | OCHRATOXIN A    | CLONITRALID        |
|-----------------------------|-----------------|-----------------|--------------------|
| Structure                   |                 |                 |                    |
| Actual Endpoint (-log C)    | 1.811           | 4.305           | 2.816              |
| Predicted Endpoint (-log C) | 1.83976         | 3.03558         | 2.74335            |
| Distance                    | 0.618           | 0.623           | 0.640              |
| Reference                   | DRFUD4 2;393;77 | FCTXAV 6;479;68 | 85ARAE 3;103;76/77 |

### Model Applicability

Unknown features are fingerprint features in the query molecule, but not found or appearing too infrequently in the training set.

1. All properties and OPS components are within expected ranges.
2. Unknown FCFP\_6 feature: 16: [\*]:[cH]:[\*]
3. Unknown FCFP\_6 feature: 1618154665: [\*][c](:[\*]):[cH]:[cH]:[\*]
4. Unknown FCFP\_6 feature: -1678275541: [\*]C(=C1C(=[\*])[\*][\*]:[c]1:[\*])[\*]
5. Unknown FCFP\_6 feature: 71476542: [\*]:[c](:[\*])Cl

### Feature Contribution

#### Top features for positive contribution

| Fingerprint | Bit/Smiles | Feature Structure    | Score |
|-------------|------------|----------------------|-------|
| ECFP_6      | 642810091  | <br>[*][c](:[*]):[*] | 0.281 |



|                                               |                   |                                                                                                                                                    |              |
|-----------------------------------------------|-------------------|----------------------------------------------------------------------------------------------------------------------------------------------------|--------------|
| ECFP_6                                        | -1897341097       | 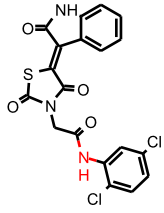<br><chem>[*]N[*]</chem>                                        | 0.216        |
| ECFP_6                                        | 577592657         | <br><chem>[*][c]1:[*]:[cH]:[cH]:[cH]:[cH]:[c](Cl):[cH]:1</chem> | 0.194        |
| <b>Top Features for negative contribution</b> |                   |                                                                                                                                                    |              |
| <b>Fingerprint</b>                            | <b>Bit/Smiles</b> | <b>Feature Structure</b>                                                                                                                           | <b>Score</b> |
| ECFP_6                                        | 2106656448        | <br><chem>[*]C(=O)[*]</chem>                                    | -0.352       |
| ECFP_6                                        | -817402818        | <br><chem>[*]Cl</chem>                                         | -0.263       |
| FCFP_6                                        | 566058135         | <br><chem>[*]NC(=O)C(=[*])[*]</chem>                          | -0.216       |



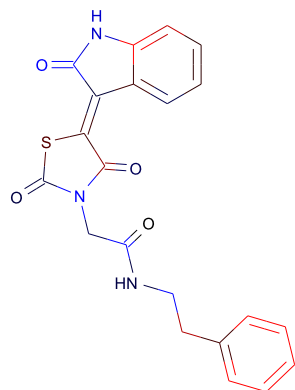
 $C_{21}H_{17}N_3O_4S$ 

Molecular Weight: 407.44237

ALogP: 2.027

Rotatable Bonds: 5

Acceptors: 5

Donors: 2

### Model Prediction

Prediction: 1.93

Unit: g/kg\_body\_weight

Mahalanobis Distance: 23.3

Mahalanobis Distance p-value: 2.09e-022

Mahalanobis Distance: The Mahalanobis distance (MD) is a generalization of the Euclidean distance that accounts for correlations among the X properties. It is calculated as the distance to the center of the training data. The larger the MD, the less trustworthy the prediction.

Mahalanobis Distance p-value: The p-value gives the fraction of training data with an MD greater than or equal to the one for the given sample, assuming normally distributed data. The smaller the p-value, the less trustworthy the prediction. For highly non-normal X properties (e.g., fingerprints), the MD p-value is wildly inaccurate.

### Structural Similar Compounds

| Name                        | PIRETANIDE      | CARBAMIC ACID; [1-[(5-CYANOPENTYL)CARBAMOYL]BENZIMIDAZOL-2-YL]-; METHYL ESTER | PENICILLIN G; POTASSIUM SALT (K STRIPPED) |
|-----------------------------|-----------------|-------------------------------------------------------------------------------|-------------------------------------------|
| Structure                   |                 |                                                                               |                                           |
| Actual Endpoint (-log C)    | 1.811           | 2.12                                                                          | 1.698                                     |
| Predicted Endpoint (-log C) | 1.83976         | 1.78415                                                                       | 1.80749                                   |
| Distance                    | 0.521           | 0.571                                                                         | 0.617                                     |
| Reference                   | DRFUD4 2;393;77 | 85ARAE 4;118;76/77                                                            | AIPTAK 123;295;60                         |

### Model Applicability

Unknown features are fingerprint features in the query molecule, but not found or appearing too infrequently in the training set.

1. All properties and OPS components are within expected ranges.
2. Unknown FCFP\_6 feature: 16: [\*]:[cH]:[\*]
3. Unknown FCFP\_6 feature: 1618154665: [\*][c](:[\*]):[cH]:[cH]:[\*]
4. Unknown FCFP\_6 feature: -1678275541: [\*]C(=C1C(=[\*])[\*][\*]:[c]1:[\*])[\*]

### Feature Contribution

#### Top features for positive contribution

| Fingerprint | Bit/Smiles | Feature Structure    | Score |
|-------------|------------|----------------------|-------|
| ECFP_6      | 642810091  | <br>[*][c](:[*]):[*] | 0.281 |

|                                               |                   |                                                                                                                             |              |
|-----------------------------------------------|-------------------|-----------------------------------------------------------------------------------------------------------------------------|--------------|
| ECFP_6                                        | -1897341097       | 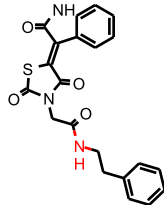<br>[*]N[*]                              | 0.216        |
| ECFP_6                                        | 1571214559        | <br>[*]1:[cH]:[cH]:[cH]:[cH]:[cH]:[cH]:1 | 0.19         |
| <b>Top Features for negative contribution</b> |                   |                                                                                                                             |              |
| <b>Fingerprint</b>                            | <b>Bit/Smiles</b> | <b>Feature Structure</b>                                                                                                    | <b>Score</b> |
| ECFP_6                                        | 2106656448        | <br>[*]C(=O)[*]                          | -0.352       |
| ECFP_6                                        | 497523368         | <br>[*]CNC(=[*])[*]                    | -0.301       |
| FCFP_6                                        | 566058135         | <br>[*]NC(=O)C(=[*])[*]                | -0.216       |



# Sorafenib

TOPKAT\_Rat\_Oral\_LD50

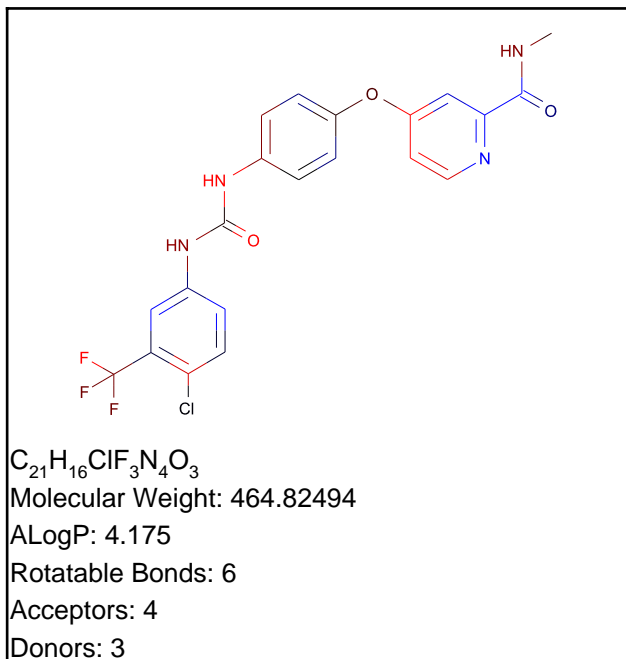

## Model Prediction

Prediction: 0.823

Unit: g/kg\_body\_weight

Mahalanobis Distance: 21

Mahalanobis Distance p-value: 1.93e-012

Mahalanobis Distance: The Mahalanobis distance (MD) is a generalization of the Euclidean distance that accounts for correlations among the X properties. It is calculated as the distance to the center of the training data. The larger the MD, the less trustworthy the prediction.

Mahalanobis Distance p-value: The p-value gives the fraction of training data with an MD greater than or equal to the one for the given sample, assuming normally distributed data. The smaller the p-value, the less trustworthy the prediction. For highly non-normal X properties (e.g., fingerprints), the MD p-value is wildly inaccurate.

## Structural Similar Compounds

| Name                        | FLUBENDAZOLE                                                                        | PHOSPHORAMIDOTHIOIC ACID; ACETIMIDOYL-; O; O-bis-(p-CHLOROPHENYL)ESTER              | BEZAFIBRATE                                                                         |
|-----------------------------|-------------------------------------------------------------------------------------|-------------------------------------------------------------------------------------|-------------------------------------------------------------------------------------|
| Structure                   | 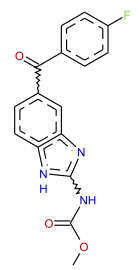 |  |  |
| Actual Endpoint (-log C)    | 2.088                                                                               | 5.006                                                                               | 1.946                                                                               |
| Predicted Endpoint (-log C) | 2.69288                                                                             | 3.23989                                                                             | 2.54395                                                                             |
| Distance                    | 0.697                                                                               | 0.703                                                                               | 0.721                                                                               |
| Reference                   | YRTMA6 9;11;78                                                                      | FMCHA2 -;C149;89                                                                    | ARZNAD 30;2023;80                                                                   |

## Model Applicability

Unknown features are fingerprint features in the query molecule, but not found or appearing too infrequently in the training set.

1. All properties and OPS components are within expected ranges.
2. Unknown FCFP\_6 feature: 16: [\*]:[cH]:[\*]
3. Unknown FCFP\_6 feature: 71476542: [\*]:[c](:[\*])Cl
4. Unknown FCFP\_6 feature: 1747237384: [\*][c](:[\*]):n:[cH]:[\*]
5. Unknown FCFP\_6 feature: 1618154665: [\*][c](:[\*]):[cH]:[cH]:[\*]
6. Unknown FCFP\_6 feature: 136686699: [\*]NC

## Feature Contribution

### Top features for positive contribution

| Fingerprint | Bit/Smiles | Feature Structure | Score |
|-------------|------------|-------------------|-------|
|             |            |                   |       |

| FCFP_6                                 | 71953198    | 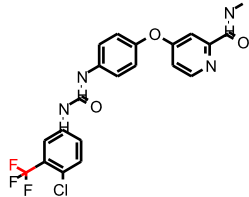<br>[*]C[*]F    | 0.392  |
|----------------------------------------|-------------|----------------------------------------------------------------------------------------------------|--------|
| ECFP_6                                 | -1046436026 | <br>[*]F        | 0.349  |
| ECFP_6                                 | 642810091   | <br>[*]c[*]:[*] | 0.281  |
| Top Features for negative contribution |             |                                                                                                    |        |
| Fingerprint                            | Bit/Smiles  | Feature Structure                                                                                  | Score  |
| ECFP_6                                 | 226796801   | <br>[*]C[*]F   | -0.32  |
| ECFP_6                                 | -817402818  | <br>[*]Cl     | -0.263 |

|        |            |                                                                                                                                                                                                             |        |
|--------|------------|-------------------------------------------------------------------------------------------------------------------------------------------------------------------------------------------------------------|--------|
| ECFP_6 | -176455838 | 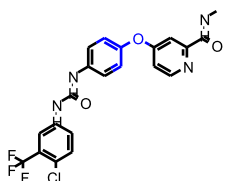<br><chem>C1=NC2=C(N1)C=CC=C2C3=CC=C(C=C3)C(F)FClC4=CC=C(C=C4)N5C=CC(=C5)C6=CC=C(C=C6)OC7=CC=C(C=C7)N8C=CC(=C8)Cl</chem> | -0.257 |
|--------|------------|-------------------------------------------------------------------------------------------------------------------------------------------------------------------------------------------------------------|--------|



# Sunitinib

TOPKAT\_Rat\_Oral\_LD50

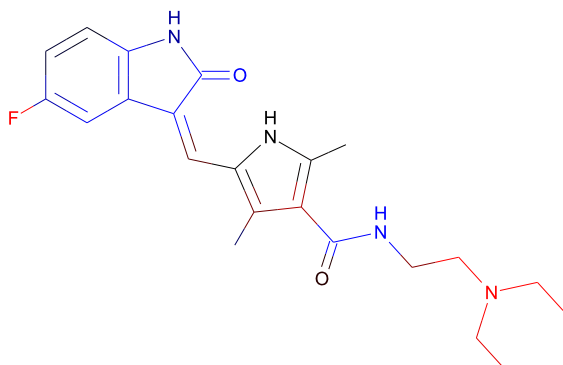

$C_{22}H_{27}FN_4O_2$

Molecular Weight: 398.47378

ALogP: 2.997

Rotatable Bonds: 7

Acceptors: 3

Donors: 3

## Model Prediction

Prediction: 2.88

Unit: g/kg\_body\_weight

Mahalanobis Distance: 23.7

Mahalanobis Distance p-value: 3.38e-024

Mahalanobis Distance: The Mahalanobis distance (MD) is a generalization of the Euclidean distance that accounts for correlations among the X properties. It is calculated as the distance to the center of the training data. The larger the MD, the less trustworthy the prediction.

Mahalanobis Distance p-value: The p-value gives the fraction of training data with an MD greater than or equal to the one for the given sample, assuming normally distributed data. The smaller the p-value, the less trustworthy the prediction. For highly non-normal X properties (e.g., fingerprints), the MD p-value is wildly inaccurate.

## Structural Similar Compounds

| Name                        | METHYLERGONOVINE | CLEBOPRIDE; MALATE SALT (MALATE STRIPPED) | DOMPERIDONE      |
|-----------------------------|------------------|-------------------------------------------|------------------|
| Structure                   |                  |                                           |                  |
| Actual Endpoint (-log C)    | 3.562            | 2.168                                     | 1.91             |
| Predicted Endpoint (-log C) | 2.94539          | 2.89926                                   | 2.49077          |
| Distance                    | 0.567            | 0.599                                     | 0.601            |
| Reference                   | 27ZIAQ -;163;73  | OYYAA2 25;803;83                          | YACHDS 8;3991;80 |

## Model Applicability

Unknown features are fingerprint features in the query molecule, but not found or appearing too infrequently in the training set.

1. All properties and OPS components are within expected ranges.
2. Unknown ECFP\_2 feature: 980271847: [\*][c]1:[\*]:[\*]:[nH]:[c]:1C=[\*]
3. Unknown FCFP\_6 feature: 19: [\*]:[nH]:[\*]
4. Unknown FCFP\_6 feature: 16: [\*]:[cH]:[\*]
5. Unknown FCFP\_6 feature: 71476542: [\*]:[c](:[\*])Cl
6. Unknown FCFP\_6 feature: 2005402822: [\*][c]1:[\*]:[\*]:[c]([\*]):[nH]:1
7. Unknown FCFP\_6 feature: 203707511: [\*][c]1:[\*]:[\*]:[nH]:[c]:1C=[\*]
8. Unknown FCFP\_6 feature: -1678275541: [\*]C(=C1C(=[\*])[\*]:[c]1:[\*])[\*]
9. Unknown FCFP\_6 feature: 451371068: [\*]C(=C[c](:[\*]):[\*])[\*]
10. Unknown FCFP\_6 feature: 1618154665: [\*][c](:[\*]):[cH]:[cH]:[\*]

## Feature Contribution

### Top features for positive contribution

| Fingerprint | Bit/Smiles | Feature Structure | Score |
|-------------|------------|-------------------|-------|
|             |            |                   |       |

|        |             |                                                                                                         |       |
|--------|-------------|---------------------------------------------------------------------------------------------------------|-------|
| ECFP_6 | -1046436026 | 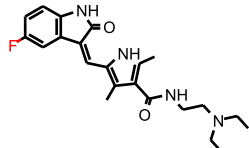<br>[*]F             | 0.349 |
| ECFP_6 | 642810091   | <br>[*][c](:[*]):[*] | 0.281 |
| FCFP_6 | 1852108031  | <br>[*]CCN(CC)CC     | 0.226 |

**Top Features for negative contribution**

| Fingerprint | Bit/Smiles | Feature Structure                                                                                        | Score  |
|-------------|------------|----------------------------------------------------------------------------------------------------------|--------|
| ECFP_6      | 2106656448 | 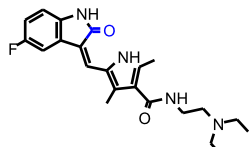<br>[*]C(=O)[*]     | -0.352 |
| ECFP_6      | 497523368  | <br>[*]CNC(=[*])[*] | -0.301 |

|        |           |                                                                                                                                              |        |
|--------|-----------|----------------------------------------------------------------------------------------------------------------------------------------------|--------|
| FCFP_6 | 566058135 | 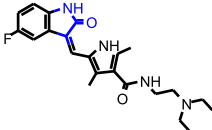 <p data-bbox="1386 292 1554 316">[*]NC(=O)C(=[*])[*]</p> | -0.216 |
|--------|-----------|----------------------------------------------------------------------------------------------------------------------------------------------|--------|
